# Supplementary material for: The role of automated evaluation techniques in online professional translator training
Source: PeerJ Comput Sci. 2021 Oct 4;7:e706. doi: 10.7717/peerj-cs.706 (PMC8507487; doi:10.7717/peerj-cs.706)
Supplement: Supplemental Information 2 — Raw data with calculated automatic metrics and their residuals (alternate file) [file peerj-cs-07-706-s002.xlsx]

## Sheet: Data
id_document	sequence	id	source_text	mt_text	pemt_text	reht_text	PER_MT	WER_MT	HTER_MT	TER_MT	CDER_MT	BLEU_1_MT	BLEU_2_MT	BLUE_3_MT	BLEU_4_MT	PER_PEMT	WER_PEMT	HTER_PEMT	TER_PEMT	CDER_PEMT	BLEU_1_PEMT	BLEU_2_PEMT	BLUE_3_PEMT	BLEU_4_PEMT	PER_PE-MT	WER_PE-MT	HTER_PE-MT	TER_PE-MT	CDER_PE-MT	BLEU_1_PE-MT	BLEU_2_PE-MT	BLUE_3_PE-MT	BLEU_4_PE-MT	grade_PT
125	1	d125s1	Aarhus, Denmark: what to see, plus the best restaurants, bars and hotels	Aarhus, Dánsko: to, čo vidieť, plus tie najlepšie reštaurácie, bary a hotely	Aarhus, Dánsko: čo vidieť, plus tie najlepšie reštaurácie, bary a hotely	AARHUS, DÁNSKO: ČO MUSÍTE VIDIEŤ A ZOZNAM NAJLEPŠÍCH REŠTAURÁCIÍ, BAROV A HOTELOV	0.5	0.667	0.667	0.667	0.667	0.41	0.09	0	0	0.5	0.583	0.583	0.583	0.583	0.41	0.18	0.1	0	0	-0.084	-0.084	-0.084	-0.084	0	0.09	0.1	0	A
125	2	d125s2	The 2017 European Capital of Culture has cool museums and galleries, and a wide range of modern Nordic food and drink, all within a compact walkable city centre	2017 Európske hlavné mesto kultúry má chladné múzeí a galérií a širokú škálu moderného nórskeho jedla a pitia, to všetko v kompaktnom schodný centra mesta	Európske hlavné mesto kultúry 2017 má štýlové múzeá a galérie a širokú škálu moderného nórskeho jedla a pitia, to všetko v kompaktnom schodnom centre mesta	V KOMPAKTNOM CENTRE EURÓPSKÉHO HLAVNÉHO MESTA KULTÚRY ROKU 2017 NÁJDETE ŠTÝLOVÉ MÚZEÁ A GALÉRIE A ŠIROKÚ ŠKÁLU SEVERSKÉHO JEDLA A NÁPOJOV	0.667	1	1	1	0.714	0.44	0.16	0.04	0	0.476	0.857	0.857	0.857	0.524	0.6	0.33	0.21	0.18	-0.191	-0.143	-0.143	-0.143	-0.19	0.16	0.17	0.17	0.18	A
125	3	d125s3	The Guardian - James Clasper, Saturday 4 February 2017 07.00 GMT,	The Guardian - James Clasper, v sobotu 04.2.2017 07.00 GMT,	The Guardian - James Clasper, v sobotu 04.2.2017 07.00 GMT,	The Guardian - James Clasper, Sobota 4. február 2017 07.00 GMT	0.364	0.364	0.364	0.364	0.364	0.63	0.5	0.34	0.25	0.364	0.364	0.364	0.364	0.364	0.63	0.5	0.34	0.25	0	0	0	0	0	0	0	0	0	A
125	4	d125s4	When Aarhus was named joint European Capital of Culture for 2017, even seasoned travellers had to reach for an atlas.	Wsliepky Aarhus bol menovaný spoločný Európske hlavné mesto kultúry pre rok 2017, aj ostrieľaní cestujúci museli siahnuť po atlas.	Keď bol Aarhus menovaný za Európske hlavné mesto kultúry pre rok 2017, aj ostrieľaní cestujúci museli siahnuť po atlas.	Keď bol Aarhus vyhlásený za európske hlavné mesto kultúry na rok 2017, po atlase museli siahnuť aj tí najskúsenejší cestovatelia.	0.4	0.65	0.65	0.65	0.6	0.59	0.26	0.11	0.05	0.3	0.45	0.45	0.45	0.45	0.7	0.42	0.22	0.11	-0.1	-0.2	-0.2	-0.2	-0.15	0.11	0.16	0.11	0.06	A
125	5	d125s5	Denmark’s second city has long lived in Copenhagen’s shadow, but its cultural coronation has put a spring in its step, and increasing numbers of visitors have started succumbing to its charms.	Dánsku druhé najväčšie mesto už dlho žil v Kodani tieni, ale jej kultúrne korunovácie dal na jar vo svojom kroku, a zvyšujúce sa počty návštevníkov začali podľahol svojmu kúzlu.	Dánske druhé najväčšie mesto už dlho žilo v tieni Kodane, ale jeho kultúrne korunovanie mesto vzpružilo a zvyšujúce sa počty návštevníkov začali podľahať jeho kúzlam.	Druhé najväčšie mesto Dánska sa po dlhé roky skrývalo v tieni Kodane, avšak vďaka nedávnej kultúrnej korunovácii znova ožilo a čoraz väčšie množstvo turistov začalo podliehať jeho šarmu.	0.786	0.893	0.893	0.893	0.893	0.24	0.07	0.03	0	0.679	0.75	0.75	0.75	0.75	0.39	0.14	0.07	0	-0.107	-0.143	-0.143	-0.143	-0.143	0.15	0.07	0.04	0	A
125	6	d125s6	One of which is its size.	Jedným z nich je jej veľkosť.	Jedným z nich je jeho veľkosť.	K jedným z pôvabov mesta patrí jeho rozloha.	0.75	0.75	0.75	0.75	0.75	0.25	0.15	0	0	0.625	0.625	0.625	0.625	0.625	0.37	0.15	0	0	-0.125	-0.125	-0.125	-0.125	-0.125	0.12	0	0	0	A
125	7	d125s7	A small, compact city, with a population of just 330,000, Aarhus’s attractions are easily explored on foot or bicycle.	Malý, kompaktný mesto, s populáciou len 330,000, Aarhus atrakcie sú ľahko dostupné pešo alebo na bicykli.	Malé, kompaktné mesto, s populáciou len 330,000, atrakcie Aarhusu sú ľahko dostupné pešo alebo na bicykli.	Je to malé, kompaktné mesto, kde žije len 330 000 obyvateľov. K hlavným atrakciám Aarhusu sa môžete ľahko dostať či už pešo alebo na bicykli.	0.72	0.72	0.72	0.72	0.68	0.28	0.12	0.09	0.04	0.6	0.6	0.6	0.6	0.6	0.4	0.21	0.13	0.04	-0.12	-0.12	-0.12	-0.12	-0.08	0.12	0.09	0.04	0	A
125	8	d125s8	They include:	Patria medzi ne:	Patria medzi ne:	Medzi ne patrí napríklad	0.5	0.75	0.75	0.75	0.75	0.5	0.37	0	0	0.5	0.75	0.75	0.75	0.75	0.5	0.37	0	0	0	0	0	0	0	0	0	0	0	A
125	9	d125s9	ARoS, the contemporary art museum whose rainbow-coloured roof installation can be seen from all over town; the cutting-edge architecture of the revitalised harbour area; the gobsmacking redevelopment of Godsbanen, a goods station turned cultural centre; and the medieval streets of the Latin Quarter.	ARoS, Múzeum súčasného umenia, ktorého dúhovom strešné inštalácie možno vidieť z celého mesta; špičková architektúra revitalizovaného oblasti prístavu; gobsmacking sanácie Godsbanen, stanica tovar otočil kultúrne centrum; a stredoveké uličky Latinskej štvrti.	ARoS, Múzeum súčasného umenia, ktorého dúhovo sfarbené strešné inštalácie možno vidieť z celého mesta; špičková architektúra zrekonštruovanej oblasti prístavu; obdivuhodná rekonštrukcia nákladnej stanice Godsbanen, z ktorej vzniklo kultúrne centrum; a stredoveké uličky Latinskej štvrti.	ARoS, múzeum súčasného umenia, ktoré je vďaka svojej dúhovo sfarbenej strešnej konštrukcii viditeľné z každého kúta mesta, moderná, inovatívna architektúra zrekonštruovanej prístavnej štrvte, obdivuhodná rekonštrukcia nákladnej stanice Godsbanen, z ktorej sa stalo kultúrne centrum, či stredoveké uličky v Latinskej Štvrti.	0.625	0.65	0.65	0.65	0.65	0.35	0.15	0.05	0.02	0.45	0.475	0.475	0.475	0.475	0.54	0.33	0.18	0.13	-0.175	-0.175	-0.175	-0.175	-0.175	0.19	0.18	0.13	0.11	A
125	10	d125s10	A bike also comes in handy for making the most of the city’s location on the Jutland peninsula.	Bicykel tiež príde vhod pre čo najlepšie využitie lokality mesta na Jutskom polostrove.	Bicykel tiež príde vhod pre čo najlepšie využitie lokality mesta na Jutskom polostrove.	V meste sa vám zíde bicykel, aby ste tak mohli vidieť čo najviac z toho, čo vám ponúka Jutský polostrov, na ktorom sa mesto nachádza.	0.88	0.92	0.92	0.92	0.88	0.08	0	0	0	0.88	0.92	0.92	0.92	0.88	0.08	0	0	0	0	0	0	0	0	0	0	0	0	A
125	11	d125s11	On two wheels, you’re barely 15 minutes from a forest or beach.	Na dvoch kolesách, ty si sotva 15 minút od lesa alebo pláž.	Na dvoch kolesách ste sotva 15 minút od lesa alebo pláže.	Bicyklom sa z mesta dopravíte na pláž alebo k lesu len za 15 minút.	0.643	1	1	1	0.857	0.35	0.07	0	0	0.714	1	1	1	0.857	0.28	0.07	0	0	0.071	0	0	0	0	-0.07	0	0	0	A
125	12	d125s12	Despite its size and provincial mien, Aarhus is a lively place.	Napriek svojej veľkosti a provinčné výzoru, Aarhus je živé miesto.	Napriek svojej veľkosti a provinčnému výzoru je Aarhus živé miesto.	Napriek svojej rozlohe a malomestskému prostrediu je Aarhus živé mesto.	0.4	0.6	0.6	0.6	0.6	0.6	0.11	0	0	0.4	0.4	0.4	0.4	0.4	0.6	0.33	0.12	0	0	-0.2	-0.2	-0.2	-0.2	0	0.22	0.12	0	A
125	13	d125s13	Students comprise more than 10% of the population, making it Denmark’s youngest city.	Študenti tvorí viac ako 10% populácie, čo je Dánska najmladší mesto.	Študenti tvoria viac ako 10% populácie, čo je najmladšie mesto Dánska.	Študenti tu predstavujú 10% obyvateľstva, čo z Aarhusu robí najmladšie mesto Dánska	0.583	0.75	0.75	0.75	0.75	0.41	0	0	0	0.5	0.583	0.583	0.583	0.583	0.5	0.18	0.1	0	-0.083	-0.167	-0.167	-0.167	-0.167	0.09	0.18	0.1	0	A
125	14	d125s14	And it’s getting younger.	A je to čím ďalej mladšie.	A je čím ďalej mladšie.	a stále mladne.	1	1	1	1	1	0.16	0	0	0	1	1	1	1	1	0.2	0	0	0	0	0	0	0	0	0.04	0	0	0	A
125	16	d125s16	Another sign of the times is the “buggy park” at the new public library, which rings a tubular bell every time a baby is born in Aarhus – a metaphor, perhaps, for the city’s renaissance.	Ďalším znamením doby je "kočík park" v novej verejnej knižnice, pričom tieto kruhy rúrkového Bell zakaždým, keď sa dieťa narodí v Aarhuse - metaforou, snáď pre renesanciu mesta.	Ďalším znamením doby je "kočíkový park" v novej verejnej knižnici, kde sa zvoní na trubicové zvony zakaždým, keď sa v Aarhuse narodí dieťa - snáď metafora pre renesanciu mesta.	Ďaľším znakom moderných zvyklostí je tzv. buginový park, ktorý sa nachádza v novej verejnej knižnici a kde sa zvoní na trubicové zvony vždy, keď sa v Aarhuse narodí dieťa, čo môže byť metaforou pre renesanciu mesta.	0.528	0.694	0.694	0.694	0.667	0.41	0.17	0.05	0	0.389	0.417	0.417	0.417	0.389	0.58	0.43	0.32	0.21	-0.139	-0.277	-0.277	-0.277	-0.278	0.17	0.26	0.27	0.21	A
125	17	d125s17	Visiting families will appreciate free entrance to city museums for under-18s.	Navštevujúci rodiny ocenia voľný vstup do mestských múzeí pre osoby mladšie ako 18 rokov.	Navštevujúce rodiny ocenia voľný vstup do mestských múzeí pre osoby mladšie ako 18 rokov.	Rodiny ocenia voľný vstup do mestského múzea pre deti do 18 rokov.	0.417	0.5	0.5	0.5	0.5	0.57	0.38	0.25	0.18	0.417	0.5	0.5	0.5	0.5	0.57	0.38	0.25	0.18	0	0	0	0	0	0	0	0	0	A
125	18	d125s18	Aarhus is buzzing with new bars, cafes and restaurants – many of which showcase New Nordic cuisine, including a trio of Michelin-starred restaurants.	Aarhus je bzučanie s novými barov, kaviarní a reštaurácií - z ktorých mnohí predstavia New severskú kuchyňu, vrátane trojice michelinskými reštauráciami.	Aarhus sa hemží s novými barmi, kaviarňami a reštauráciami - z ktorých mnohé predstavujú novú severskú kuchyňu, vrátane trojice michelinských reštaurácií.	V Aarhuse sa to hemží novými barmi, kaviarňami a reštauráciami, z ktorých mnohé ponúkajú novú severskú kuchyňu. Medzi ne patria napríklad aj tri reštaurácie, ktoré sa pýšia michellinovskou hviezdou.	0.759	0.828	0.828	0.828	0.793	0.24	0.07	0	0	0.517	0.621	0.621	0.621	0.586	0.44	0.28	0.19	0.08	-0.242	-0.207	-0.207	-0.207	-0.207	0.2	0.21	0.19	0.08	A
125	19	d125s19	While for visitors on tighter budgets, there’s a new street-food market in town.	Zatiaľ čo pre návštevníkov na krátenie rozpočtov, je tu nový trh ulice jedlo v meste.	Pre návštevníkov s nízkym rozpočtom je tu nový trh s pouličným jedlom.	Pre turistov s nižším rozpočtom je k dispozícii novopostavený trh s pouličným jedlom.	0.923	1	1	1	0.923	0.2	0	0	0	0.385	0.385	0.385	0.385	0.385	0.61	0.33	0.18	0.1	-0.538	-0.615	-0.615	-0.615	-0.538	0.41	0.33	0.18	0.1	A
125	20	d125s20	But it’s the city’s year-long status as Capital of Culture that has lifted local spirits.	Ale je to celoročná status mesto je ako hlavné mesto kultúry, ktorá zrušila miestne liehoviny.	Je to však celoročný status mesta ako hlavného mesta kultúry, ktorý povzbudil miestneho ducha.	To, čo povzbudilo miestneho ducha je však už spomínaný celoročný status hlavného kultúrneho mesta Európy.	0.8	1	1	1	0.867	0.26	0	0	0	0.4	1	1	1	0.733	0.66	0.14	0	0	-0.4	0	0	0	-0.134	0.4	0.14	0	0	A
125	21	d125s21	A highlight of the jam-packed calendar is Red Serpent, which promises to be the largest outdoor show staged in Denmark.	Vrcholom zaplnenom kalendári je červený had, ktorý sľubuje, že bude najväčší vonkajší prehliadka koná v Dánsku.	Vrcholom zaplneného kalendára je Červený had, ktorý sľubuje, že bude najväčším vonkajším predstavením v Dánsku.	Hlavnou udalosťou preplneného kalendára je predstavenie Red Serpent, ktoré ako sa zdá, bude najväčším divadelným predstavením v Dánsku konajúcim sa pod šírym nebom.	0.826	0.87	0.87	0.87	0.826	0.17	0.04	0	0	0.696	0.696	0.696	0.696	0.652	0.3	0.18	0.05	0	-0.13	-0.174	-0.174	-0.174	-0.174	0.13	0.14	0.05	0	A
125	22	d125s22	Held on the dramatic sloping roof of the Moesgaard Museum, it will feature Viking battles, fire and galloping horses – and should certainly put Aarhus on the map.	Sa konalo v dňoch dramatickej šikmú strechu Moesgaard múzea, bude to patrí Viking bitky, oheň a cválajúca kone - a mal by určite dať Aarhus na mape.	Bude sa konať na dramatickej šikmej streche Moesgaardskeho múzea, bude predvádzať vikingské vojny, oheň a cválajúce kone - a mal by určite dať Aarhus na mapu.	Odohrávať sa bude na dramatickej šikmej streche Moesgaardskeho múzea, kde budú predvádzať vikingské vojny, oheň a cválajúce kone. Aj vďaka tomu, sa Aarhus dostane do povedomia ľudí.	0.63	0.815	0.815	0.815	0.778	0.37	0.03	0	0	0.37	0.481	0.481	0.481	0.444	0.7	0.42	0.36	0.29	-0.26	-0.334	-0.334	-0.334	-0.334	0.33	0.39	0.36	0.29	A
126	1	d126s1	Manchester United’s Zlatan Ibrahimovic:	Manchester United je Zlatan Ibrahimovič:	Zlatan Ibrahimovič z Manchester United:	Zlatan Ibrahimovič z Manchester United:	0.2	1	1	1	0.8	0.8	0.5	0	0	0	0	0	0	0	1	1	1	1	-0.2	-1	-1	-1	-0.8	0.2	0.5	1	1	C
126	2	d126s2	I am like Indiana Jones	Som ako Indiana Jones	Som ako Indiana Jones	Som ako Indiana Jones	0	0	0	0	0	1	1	1	1	0	0	0	0	0	1	1	1	1	0	0	0	0	0	0	0	0	0	C
126	3	d126s3	The Manchester United striker Zlatan Ibrahimovic has compared his history of success to the fictional archaeologist and adventurer Indiana Jones.	Manchester United útočník Zlatan Ibrahimovič sa oproti svojej histórii úspechov fiktívneho archeológa a dobrodruha Indiana Jones.	Z Manchesteru United útočník Zlatan Ibrahimovič sa prirovnal k histórii úspechov fiktívneho archeológa a dobrodruha Indiana Jonesa.	Útočník anglického tímu Manchester United Zlatan Ibrahimovič prirovnal svoje úspechy k fiktívnej postave archeológa a dobrodruha Indiana Jonesa.	0.5	0.611	0.611	0.611	0.611	0.5	0.29	0.12	0.06	0.389	0.611	0.611	0.611	0.556	0.61	0.29	0.18	0.13	-0.111	0	0	0	-0.055	0.11	0	0.06	0.07	C
126	4	d126s4	The 35-year-old has lived up to the hype since arriving at Old Trafford in the summer and took his goal tally to 23 in all competitions on Thursday.	35-ročný žije až do humbuk od svojho príchodu na Old Trafford v lete a vzala ju za bránkovú zhodujú až 23 vo všetkých súťažiach vo štvrtok.	35-ročný účtočník zažíva humbuk od svojho príchodu na Old Trafford v lete, strelil až 23 gólov vo všetkých súťažiach do štvrtku.	Tento tridsaťpäťročný útočník napĺňal vízie verejnosti už od leta, kedy po prvýkrát vstúpil na štadión Old Trafford a vo všetkých súťažiach do tohto štvrtku stihol nastrieľať 23 gólov.	0.643	0.964	0.964	0.964	0.75	0.39	0.11	0.03	0	0.607	0.821	0.821	0.821	0.679	0.39	0.18	0.07	0.04	-0.036	-0.143	-0.143	-0.143	-0.071	0	0.07	0.04	0.04	C
126	5	d126s5	Ibrahimovic’s first hat-trick for the club saw St Étienne put to the sword at Old Trafford as José Mourinho’s men ran out 3-0 victory in the first leg of their Europa League last-32 tie.	Ibrahimovič prvý hetrik pre klub videl St Etienne ostrím meča na Old Trafford ako José Mourinho muži došli 3-0 víťazstvo v prvej etape svojho Europa League posledný-32 kravatou.	Ibrahimovičov prvý hetrik videl klub St Etienne na Old Trafford ako Josého Mourinho muži vydobyli 3-0 víťazstvo v prvej etape Európskej ligy v 32 kole.	Jeho prvý hattrick za nový klub padol do brány francúzskeho St Étienne na Old Strafford, kde domáci tím Josého Mourinho vyhral 3:0, v 32. kole prvej etapy Európskej ligy.	0.724	0.862	0.862	0.862	0.793	0.27	0.03	0	0	0.552	0.759	0.759	0.759	0.621	0.48	0.17	0.03	0	-0.172	-0.103	-0.103	-0.103	-0.172	0.21	0.14	0.03	0	C
126	6	d126s6	United are favourites to win the competition, just as they are for the upcoming EFL Cup final against Southampton, and the veteran Swede is determined to win more silverware.	United sú obľúbené vyhrať súťaž, rovnako ako oni sú pre nadchádzajúce EFL Cupu proti Southamptonu a veterán Švéd je určená na výhru väčšie striebro.	United sú favoritmi vyhrať súťaž, rovnako ako v nadchádzajúcom finále anglického pohára proti Southamptonu a veterán Švéd si trúfa na vyššie umiestnenie ako na striebro.	United sú najväčšími favoritmi súťaže, rovnako je tomu i v nadchádzajúcom finálovom zápase anglického pohára proti Southamptonu, v ktorom si švédsky veterán trúfa na víťaznú pozíciu.	0.692	0.808	0.808	0.808	0.808	0.34	0.08	0	0	0.423	0.692	0	0	0.615	0.57	0.24	0.08	0.04	-0.269	-0.116	-0.808	-0.808	-0.193	0.23	0.16	0.08	0.04	C
126	7	d126s7	“Every trophy for me is incredible, everywhere I came I won so if I can win something here I will be super happy,” he said.	"Každá trofej je pre mňa neuveriteľné, všade som prišiel som vyhral, takže či môžem niečo vyhrať tu budem mimoriadne spokojný," povedal.	"Každá trofej je pre mňa výnimočná, všade, kde som prišiel, som vyhral, takže ak môžem niečo vyhrať tu, budem mimoriadne spokojný," povedal.	“Každá trofej je pre mňa dôležitá. Všade, kde som bol, sa mi podarilo zvíťaziť. Tak ak vyhrám aj tu, budem veľmi šťastný”, hovorí.	0.652	0.652	0.652	0.652	0.609	0.39	0.18	0.09	0.05	0.565	0.609	0.609	0.609	0.565	0.47	0.27	0.14	0.05	-0.087	-0.043	-0.043	-0.043	-0.044	0.08	0.09	0.05	0	C
126	8	d126s8	“People that know me know that I play in many clubs and I try to do my best.	"Ľudia, ktorí ma poznajú, vedia, že hrám v mnohých kluboch a snažím sa robiť to najlepšie.	"Ľudia, ktorí ma poznajú, vedia, že hrám v mnohých kluboch a snažím sa robiť to najlepšie.	“Ľudia, ktorí ma poznajú, vedia, že v každom tíme v ktorom hrám, skúšam zo seba vydať to najlepšie.	0.444	0.556	0.556	0.556	0.5	0.5	0.29	0.19	0.13	0.444	0.556	0.556	0.556	0.5	0.5	0.29	0.19	0.13	0	0	0	0	0	0	0	0	0	C
126	9	d126s9	Wherever I went I won, so I am like Indiana Jones.”	Kamkoľvek som išiel som vyhral, takže som ako Indiana Jones. "	Kamkoľvek som išiel, som vyhral, takže som ako Indiana Jones. "	Vyhral som zatiaľ všade, takže som ako Indiana Jones."	0.333	0.444	0.444	0.444	0.333	0.8	0.44	0.37	0.28	0.333	0.444	0.444	0.444	0.333	0.8	0.44	0.37	0.28	0	0	0	0	0	0	0	0	0	C
126	10	d126s10	Thursday’s hat-trick was the 17th of his career and took his goal tally against St Étienne alone to 17.	Štvrtkové hat-trick bol 17. v jeho kariére a vzala ju za bránkovú zhodujú proti St Etienne sám až 17.	Štvrtkový hetrik bol 17. v jeho kariére a do brány St Etienne sám strelil až 17 gólov.	Štvrtkovým trojgólovým úspechom Ibrabimovič nie len zaznamenal sedemnásty hattrick v kariére, ale tiež i sedemnásty gól do siete klubu St Étienne.	0.905	1	1	1	0.905	0.09	0	0	0	0.857	1	1	1	0.857	0.14	0	0	0	-0.048	0	0	0	-0.048	0.05	0	0	0	C
126	11	d126s11	“It feels good,” Ibrahimovic said.	"Je to dobrý pocit," povedal Ibrahimovič.	"Je to dobrý pocit," povedal Ibrahimovič.	“Je to dobrý pocit,” povedal.	0.6	0.6	0.6	0.6	0.4	0.5	0.2	0	0	0.6	0.6	0.6	0.6	0.4	0.5	0.2	0	0	0	0	0	0	0	0	0	0	0	C
126	12	d126s12	“I got a lot of help from my team-mates.	"Mám veľa pomoci od svojich spoluhráčov.	"Mám veľa pomoci od svojich spoluhráčov.	“Veľmi mi pomohli moji spoluhráči.	1	1	1	1	1	0	0	0	0	1	1	1	1	1	0	0	0	0	0	0	0	0	0	0	0	0	0	C
126	13	d126s13	We played an open game and it was important to get a good result so we can take it into the second leg.	Hrali sme otvorenú hru a to bolo dôležité získať dobrý výsledok, takže môžeme vziať ho do druhej etapy.	Hrali sme otvorenú hru, bolo dôležité získať dobrý výsledok, aby sme mohli pokračovať v druhej etape.	Hrali sme otvorenú hru a bolo pre nás veľmi dôležité uhrať naozaj dobrý výsledok, a tým sa dostať do druhej polovice súťaže.	0.455	0.545	0.545	0.545	0.545	0.5	0.28	0.15	0.1	0.591	0.591	0.591	0.591	0.591	0.45	0.19	0.1	0.05	0.136	0.046	0.046	0.046	0.046	-0.05	-0.09	-0.05	-0.05	C
126	14	d126s14	We won 3-0 and I got to score the three goals so I am happy for that.	Vyhrali sme 3-0 a dostal som sa streliť tri góly, takže som rád za to.	Vyhrali sme 3-0 a ja som strelil tri góly, takže som rád za to.	Vyhrali sme 3-0 a ja som strelil tri góly, čo ma teší.“	0.667	0.667	0.667	0.667	0.583	0.53	0.28	0.15	0.08	0.417	0.417	0.417	0.417	0.333	0.71	0.61	0.58	0.54	-0.25	-0.25	-0.25	-0.25	-0.25	0.18	0.33	0.43	0.46	C
126	15	d126s15	Not everybody wearing red on Thursday can say they did their job, leading Mourinho to express his anger at their first-half display.	Nie každý na sebe červené štvrtok Dá sa povedať, že robili svoju prácu, čo vedie k Mourinho vyjadriť svoj hnev na ich prvej polovice displeja.	Nie každý na sebe s červeným, štvrtok povedal, že si hráči robili svoju prácu, aj tréner Mourinho vyjadriť svoj hnev počas prvej polovice zápasu.	Nie každý fanúšik anglického tímu mal počas zápasu úsmev na tvári. Na čele s trénerom Mourinhom, ktorý ukázal svoju nespokojnosť v prvom polčase.	0.87	1	1	1	0.87	0.2	0.04	0	0	0.739	1	1	1	0.87	0.28	0.04	0	0	-0.131	0	0	0	0	0.08	0	0	0	C
126	16	d126s16	It was in the end, though, a solid first-leg victory against a decent side that few expect to overturn the deficit in France next Wednesday.	Bolo to na konci, keď solídny first-noha víťazstvo proti slušnej strane, ktorá málokto očakával zvrátiť deficit vo Francúzsku budúcu stredu.	Nakoniec to bolo solídne víťazstvo prvej etapy súťaže proti slušnej protistrane a málokto očakáva zvrátenie deficitu vo Francúzsku budúcu stredu.	Nakoniec to však bola celkom slušná výhra prvej etapy súťaže proti slušnému súperovi. Už len ťažko dúfať, že odplatný zápas vo Francúzsku budúcu stredu dokáže obrátiť skóre.	0.778	0.778	0.778	0.778	0.741	0.22	0.11	0.08	0.04	0.63	0.63	0.63	0.63	0.63	0.37	0.27	0.16	0.08	-0.148	-0.148	-0.148	-0.148	-0.111	0.15	0.16	0.08	0.04	C
126	17	d126s17	Put to Ibrahimovic that a clean sheet was important, the former Paris St Germain striker said:	Daný k Ibrahimovič, že čistý list bol dôležitý, bývalý Paris St Germain útočník povedal:	Podľa Ibrahimoviča čisté konto bolo dôležité, bývalý útočník Parížu St Germain povedal:	Podľa bývalého hráča Parížu St Germain bolo veľmi dôležité udržať čisté konto:	1	1	1	1	0.833	0.14	0.07	0	0	0.333	0.917	0.917	0.917	0.667	0.66	0.27	0.1	0	-0.667	-0.083	-0.083	-0.083	-0.166	0.52	0.2	0.1	0	C
126	18	d126s18	“Exactly.	"Presne tak.	"Presne tak.	"Presne,	1	1	1	1	1	0	0	0	0	1	1	1	1	1	0	0	0	0	0	0	0	0	0	0	0	0	0	C
126	21	d126s21	It was important today to get a good result.	Bolo dôležité dnes získať dobrý výsledok.	Bolo dôležité dnes získať dobrý výsledok.	Dnes bolo veľmi dôležité získať dobrý výsledok.	0.143	0.429	0.429	0.429	0.429	0.85	0.34	0.21	0	0.143	0.429	0.429	0.429	0.429	0.85	0.34	0.21	0	0	0	0	0	0	0	0	0	0	C
127	1	d127s1	Six endangered wild horses moved to Russian reserve	Šesť ohrozené divé kone sa sťahoval do ruskej rezervy	Šesť ohrozených divokých koní presťahovali do ruskej rezervácie	Šesť ohrozených divokých koní presťahovali do ruskej rezervácie	0.75	0.75	0.75	0.75	0.75	0.33	0.12	0	0	0	0	0	0	0	1	1	1	1	-0.75	-0.75	-0.75	-0.75	-0.75	0.67	0.88	1	1	B
127	2	d127s2	It is hoped that eventually 100 of the Przewalski’s horse will live in the Orenburg Reserves – the largest strictly protected plot of virgin steppe in Russia.	Predpokladá sa, že nakoniec 100 zo koňa Przewalského bude žiť v Orenburg rezervách - najväčší prísne chránenú dej panenského stepi v Rusku.	Predpokladá sa, že nakoniec 100 jedincov koňa Przewalského bude žiť v Orenburgských rezerváciách - najväčších prísne chránených panenských stepiach v Rusku.	Veríme, že bude časom žiť 100 jedincov plemena kôň Przewalského v Orenburgských rezerváciách – v najväčšom prísne chránenom území panenských stepí v Rusku.	0.565	0.826	0.826	0.826	0.739	0.39	0.04	0	0	0.391	0.652	0.652	0.652	0.565	0.56	0.18	0.04	0	-0.174	-0.174	-0.174	-0.174	-0.174	0.17	0.14	0.04	0	B
127	3	d127s3	Six of the world’s few surviving wild horses, born at a reserve in the south of France, are spending their first winter in a flagship reintroduction project for the endangered animals in Russia.	Šesť svetových mála zachovaných divokých koní, narodených v rezerve na juhu Francúzska, trávia svoj prvý zimu vo vlajkovej lodi znovuzavedenie projektu ohrozených zvierat v Rusko.	Šesť divokých koní, narodených v rezervácii na juhu Francúzska, trávi svoju prvú zimu pod záštitou vlajkového projektu reintrodukcie pre ohrozené zvieratá v Rusku.	Šesť divokých koní, narodených v rezervácii na juhu Francúzska, trávi svoju prvú zimu pod záštitou vlajkového projektu reintrodukcie pre ohrozené zvieratá v Rusku.	0.609	0.696	0.696	0.696	0.609	0.44	0.2	0.13	0.04	0	0	0	0	0	1	1	1	1	-0.609	-0.696	-0.696	-0.696	-0.609	0.56	0.8	0.87	0.96	B
127	4	d127s4	https://www.theguardian.com/world/russia	https://www.theguardian.com/world/russia	https://www.theguardian.com/world/russia	https://www.theguardian.com/world/russia	1	1	0	1	0	0	0	0	0	1	1	0	1	0	0	0	0	0	0	0	0	0	0	0	0	0	0	B
127	5	d127s5	Scientists hope 100 of the species known as Przewalski’s horse will live on the site in the Orenburg Reserves, a cluster of six strictly protected nature areas along the border with Kazakhstan.	Vedci dúfajú, 100 druhov známych ako kone Przewalského bude žiť na mieste v Orenburg rezerv, zhluk šiestich prísne chránených prírodných oblastí pozdĺž hranice s Kazachstanom.	Vedci veria, že 100 jedincov druhu známeho ako kôň Przewalského bude žiť v Orenburgských rezerváciách, ktoré sú zhlukom šiestich prísne chránených prírodných oblastí pozdĺž hraníc s Kazachstanom.	Vedci veria, že 100 jedincov druhu známeho ako kôň Przewalského bude žiť v Orenburgských rezerváciách, ktoré sú zhlukom chránených prírodných území pozdĺž hraníc s Kazachstanom.	0.52	0.6	0.6	0.6	0.56	0.48	0.16	0.04	0	0.16	0.16	0.16	0.16	0.12	0.85	0.74	0.61	0.52	-0.36	-0.44	-0.44	-0.44	-0.44	0.37	0.58	0.57	0.52	B
127	6	d127s6	The area, spanning more than 16,500 hectares (40,770 acres), is “the largest unbroken, strictly protected plot of virgin steppe in Russia”, said Przewalski’s horse expert Tatjana Zharkikh, who heads the reintroduction project.	Územie s rozlohou viac ako 16,500 hektárov (40,770 akrov), je "najväčší neporušenú, prísne chránená plot panenského stepi v Rusku," povedal Kone Przewalského expert Tatjana Zharkikh, ktorý stojí na čele projektu reintrodukce.	Územie s rozlohou viac ako 16,500 hektárov (40,770 akrov), je "najväčším neporušeným, prísne chráneným územím panenských stepí v Rusku," povedala Tatjana Zharkikhová, expertka na kone Przewalského, ktorá stojí na čele projektu reintrodukcie.	Táto oblasť pokrýva viac než 16,500 hektárov (40,770 akrov) a je „najväčším nedotknutým a prísne chráneným územím panenských stepí v Rusku,” povedala Tatjana Zharkikhová, expertka na kone Przewalského, ktorá vedie tento projekt reintrodukcie.	0.636	0.758	0.758	0.758	0.697	0.36	0.12	0.06	0.03	0.364	0.394	0.394	0.394	0.364	0.66	0.46	0.38	0.3	-0.272	-0.364	-0.364	-0.364	-0.333	0.3	0.34	0.32	0.27	B
127	7	d127s7	“They are quite happy,” she told AFP, despite the harsh climate.”	"Sú celkom spokojný," povedala AFP, a to napriek drsnému klímy. "	"I napriek drsnému podnebiu sú celkom spokojné," povedala pre AFP.	Ako dodala pre tlačovú agentúru AFP: „I napriek drsnému podnebiu sú celkom šťastné.”	0.692	0.846	0.846	0.846	0.769	0.3	0.17	0	0	0.538	0.846	0.846	0.846	0.615	0.46	0.34	0.28	0.21	-0.154	0	0	0	-0.154	0.16	0.17	0.28	0.21	B
127	8	d127s8	The area is safeguarded by the fact that it belonged to the military for decades.	Táto oblasť je zabezpečená tým, že patrila k armáde po celé desaťročia.	Táto oblasť je sama o sebe chránená tým, že po celé desaťročia patrila k armáde.	Toto územie je samo o sebe chránené, pretože niekoľko desaťročí patrilo armáde.	0.833	0.917	0.917	0.917	0.833	0.16	0	0	0	0.917	0.917	0.917	0.917	0.667	0.26	0.07	0	0	0.084	0	0	0	-0.166	0.1	0.07	0	0	B
127	9	d127s9	“The animals enjoy rolling around in the snow and scratching their backs on the crusty surface,” she said.	"Zvieratá baví váľali v snehu a škrabanie chrbtom k chrumkavého povrchu," povedala.	"Zvieratá baví váľanie v snehu a škrabanie chrbtov o kôrnatý povrch," povedala.	Zharkikhová dodáva: „Zvieratá si užívajú váľanie v snehu a škrabanie chrbtov o kôrnatú zem.	0.714	0.786	0.786	0.786	0.714	0.28	0.23	0.17	0.09	0.5	0.571	0.571	0.571	0.5	0.5	0.46	0.42	0.38	-0.214	-0.215	-0.215	-0.215	-0.214	0.22	0.23	0.25	0.29	B
127	10	d127s10	“They are not afraid of wind, snow, cold … if the Przewalski’s horse has enough food, it is practically invincible.”	"Oni sa neboja vietor, sneh, zima ..., ak do Kone Przewalského má dostatok potravy, je prakticky neporaziteľný."	"Neboja sa vetra, snehu či chladu. Ak má kôň Przewalského dostatok potravy, je prakticky neporaziteľný."	Neboja sa vetra, snehu či chladu. Ak má kôň Przewalského dostatok jedla, je prakticky neporaziteľný.”	0.6	0.733	0.733	0.733	0.667	0.47	0.06	0	0	0.133	0.133	0.133	0.133	0.133	0.86	0.78	0.69	0.66	-0.467	-0.6	-0.6	-0.6	-0.534	0.39	0.72	0.69	0.66	B
127	11	d127s11	Despite its hardiness and efforts by conservationists, there is “still a long way before the Przewalski’s horse can be considered saved from extinction”, said Frederic Joly of the Association for the Przewalski’s horse in France, which provided the animals for the project.	Napriek svojej vytrvalosti a úsilia zo strany pamiatkarov, tam je "ešte dlhá cesta pred tým, než Kone Przewalského možno považovať zachránil pred vyhynutím," povedal Frederic Joly zo Združenia pre kone Przewalského vo Francúzsku, ktorá poskytla zvierat pre projekt.	Napriek svojej vytrvalosti a úsilia zo strany ochranárov je "ešte dlhá cesta predtým, než budeme môcť kone Przewalského považovať za zachránené pred vyhynutím," povedal Frederic Joly z Asociácie pre kone Przewalského vo Francúzsku, ktorá poskytla zvieratá pre projekt.	I napriek odvahe a snahe ochranárov „stále je pred nami dlhá cesta, než budeme môcť kone Przewalského považovať za zachránené pred vyhynutím,” povedal Frederic Joly z Asociácie pre kone Przewalského vo Francúzsku, ktorá poskytla zvieratá pre tento projekt.	0.41	0.538	0.538	0.538	0.513	0.58	0.26	0.16	0.11	0.205	0.308	0.308	0.308	0.282	0.76	0.57	0.51	0.47	-0.205	-0.23	-0.23	-0.23	-0.231	0.18	0.31	0.35	0.36	B
127	12	d127s12	Native to China, the stocky, tan-coloured horse with a spiky mane once inhabited the Eurasian steppe from Mongolia to Russia.	Pochádza z Číny, podsaditý, béžová kôň s špicaté hrivou kedysi obýval euroázijskou step z Mongolska do Ruska.	Zavalitý kôň béžovej farby pôvodom z Číny s ostnatou hrivou kedysi obýval euroázijské stepi od Mongolska až po Rusko.	Zavalitý kôň béžovej farby pôvodom z Číny s ostnatou hrivou začal obývať Euroázijské stepi od Mongolska až po Rusko.	0.684	0.842	0	0	0.737	0.36	0.05	0	0	0.105	0.105	0.105	0.105	0.105	0.89	0.83	0.76	0.68	-0.579	-0.737	0.105	0.105	-0.632	0.53	0.78	0.76	0.68	B
127	13	d127s13	All 2,000 animals living today are descendants of just 12 wild-caught horses.	Všetky 2,000 zvieratá žijúce dnes sú potomkovia iba 12 koní divokých ulovených.	Všetkých 2,000 zvierat, ktoré dnes žijú, sú potomkami 12 divokých odchytených koní.	Všetkých 2000 zvierat, ktoré dnes žijú, sú potomkami dvanástich divokých odchytených koní.	0.667	0.917	0.917	0.917	0.75	0.33	0	0	0	0.167	0.167	0.167	0.167	0.167	0.83	0.63	0.5	0.33	-0.5	-0.75	-0.75	-0.75	-0.583	0.5	0.63	0.5	0.33	B
127	14	d127s14	The species was discovered by Russian explorer Nikolai Przhevalsky who described it in the 19th century, leading to a surge of interest in Europe, followed by a brutal campaign to capture them.	Druh bol objavený ruský cestovateľ Nikolaj Prževalskij ktorý ju opísané v 19. storočí, čo viedlo k výraznému nárastu záujmu v Európe, nasleduje brutálny kampaň zachytiť.	Druh bol objavený ruským bádateľom Nikolaiom Przhevalskym, ktorý ho popísal v 19. storočí, čo viedlo k výraznému nárastu záujmu v Európe, nasledovanému brutálnou kampaňou za ich odchytenie.	Tento druh objavil ruský bádateľ Nikolai Przhevalsky, ktorý ho popísal v 19. storočí. To viedlo k nárastu záujmu v Európe a za ním nasledovala brutálna kampaň za ich odchytenie.	0.552	0.621	0.621	0.621	0.586	0.44	0.21	0.11	0.03	0.414	0.517	0.517	0.517	0.483	0.55	0.39	0.26	0.15	-0.138	-0.104	-0.104	-0.104	-0.103	0.11	0.18	0.15	0.12	B
127	15	d127s15	Although the Russian project meant to set the horses completely free in the wild, scientists eventually rejected this idea as too risky after studying the experience of other reintroduction centres, opting instead to build a fence around the entire area.	Hoci ruský projekt znamenal pre nastavenie kone vo voľnej prírode úplne zadarmo, vedci nakoniec odmietol túto myšlienku po preštudovaní skúseností z iných reintrodukce centier, optovat namiesto toho postaviť plot okolo celého areálu ako príliš riskantné.	Hoci bolo cieľom projektu vypustiť kone do voľnej prírody, vedci nakoniec túto myšlienku zamietli. Po preštudovaní skúseností iných reintrodukčných centier sa im to zdalo príliš riskantné a rozhodli sa, že radšej postavia okolo celého územia plot.	Hoci bolo cieľom ruského projektu vypustiť zvieratá voľne do prírody, vedci nakoniec túto myšlienku zamietli. Po preštudovaní skúseností iných reintrodukčných centier sa im to zdalo príliš riskantné a rozhodli sa, že radšej postavia plot okolo celého územia.	0.595	0.838	0.838	0.838	0.757	0.4	0.19	0.05	0	0.081	0.162	0.162	0.162	0.162	0.91	0.77	0.68	0.61	-0.514	-0.676	-0.676	-0.676	-0.595	0.51	0.58	0.63	0.61	B
128	1	d128s1	China builds world's biggest solar farm in journey to become green superpower	Čína buduje najväčší svetový solárny farma v ceste, aby sa stala zelenou veľmocou	Čína buduje svetovo najväčšiu solárnu farmu s cieľom, stať sa zelenou veľmocou	Čína stavia najväčšiu solárnu farmu na svete, aby sa stala zelenou superveľmocou.	0.667	0.667	0.667	0.667	0.667	0.38	0.25	0.18	0.1	0.5	0.583	0.583	0.583	0.583	0.5	0.18	0.1	0	-0.167	-0.084	-0.084	-0.084	-0.084	0.12	-0.07	-0.08	-0.1	B
128	2	d128s2	igh on the Tibetan plateau, a giant poster of the Chinese president, Xi Jinping, guards the entrance to one of the greatest monuments to Beijing’s quest to become a clean energy colossus.	VPN na tibetskej plošine, obrie plagát čínskeho prezidenta Xi Jinping, strážia vstup do jednej z najväčších pamiatok do Pekingu pátrania, aby sa stal čistej energie kolos.	Vysoko na tibetskej plošine, obrí plagát čínskeho prezidenta Xi Jinpinga, strážia vstup do jednej z najväčších pamiatok do Pekingu s cieľom, aby sa stal čistej energie kolosom.	Vysoko na Tibetskej náhornej plošine chráni obrovský plagát čínskeho prezidenta, Xi Jinpinga, vchod do jedného z najúžasnejších pamiatok pri Pekingu, aby sa stal kolosom čistej energie.	0.385	0.5	0.5	0.5	0.462	0.65	0.28	0.12	0.04	0.308	0.462	0.462	0.462	0.423	0.74	0.34	0.2	0.08	-0.077	-0.038	-0.038	-0.038	-0.039	0.09	0.06	0.08	0.04	B
128	4	d128s4	To Xi’s right, on the road leading to what is reputedly the biggest solar farm on earth, a billboard greets visitors with the slogan:	Xi pravicu, na ceste vedúcej k tomu, čo je údajne najväčší solárny farma na zemi, billboard pozdraví návštevníkov s heslom:	Po Xiho pravici, na ceste vedúcej k tomu, čo je údajne najväčšia solárna farma na zemi, zdraví billboard návštevníkov heslom:	Po Xiho pravici, na ceste vedúcej k údajne najväčšej solárnej farme na zemi, víta návštevníkov bildoard so sloganom:	0.667	0.778	0.778	0.778	0.611	0.4	0.21	0.11	0.05	0.556	0.611	0.611	0.611	0.5	0.52	0.35	0.26	0.22	-0.111	-0.167	-0.167	-0.167	-0.111	0.12	0.14	0.15	0.17	B
128	6	d128s6	Develop clean energy!”	Vyvinúť čistú energiu! "	Vyvíjajte čistú energiu!"	Vytvárajte čistú energiu!“	0.667	0.667	0.667	0.667	0.333	0.33	0	0	0	0.667	0.667	0.667	0.667	0.333	0.33	0	0	0	0	0	0	0	0	0	0	0	0	B
128	7	d128s7	Behind him, a sea of nearly 4m deep blue panels flows towards a spectacular horizon of snow-capped mountains – mile after mile of silicon cells tilting skywards from what was once a barren, wind-swept cattle ranch.	Za ním more takmer 4m tmavomodrých panelov prúdi smerom k veľkolepej horizonte zasneženými horami - míľu po míľu kremíkových článkov sklápania nebi z toho, čo bolo kedysi neplodná, strapatý dobytok ranč.	Za ním more takmer 4m tmavomodrých panelov prúdi smerom k veľkolepému horizontu so zasneženými horami - míľa po míľou kremíkových článkov je otočená k nebu tam, kde bol kedysi neplodný, vetrom ošľahaný ranč dobytka.	Za ním, takmer štvormetrové more modrých panelov stúpa k úžasnému obzoru hôr so zasneženými štítmi. Každý jeden kilometer kremíkových článkov sa nakláňa k nebu z miesta, ktoré bolo kedysi pustou, vetrom ošľahanou dobytčou farmou.	0.6	0.771	0.771	0.771	0.771	0.37	0.08	0	0	0.571	0.714	0.714	0.714	0.714	0.42	0.11	0	0	-0.029	-0.057	-0.057	-0.057	-0.057	0.05	0.03	0	0	B
128	8	d128s8	“It’s big!	"Je velke!	"Je to veľké!	„Je to veľké!	1	1	1	1	0.667	0	0	0	0	0.333	0.333	0.333	0.333	0	0.66	0.5	0	0	-0.667	-0.667	-0.667	-0.667	-0.667	0.66	0.5	0	0	B
128	9	d128s9	Yeah!	Yeah!	Áno!	Áno!	1	1	1	1	0	0	0	0	0	0	0	0	0	0	1	0	0	0	-1	-1	-1	-1	0	1	0	0	0	B
128	10	d128s10	Big!”	Veľký! "	Veľké!"	Veľké!"	1	1	1	1	0	0	0	0	0	0	0	0	0	0	1	0	0	0	-1	-1	-1	-1	0	1	0	0	0	B
128	11	d128s11	Gu Bin, one of the engineers responsible for building the Longyangxia Dam Solar Park in the western province of Qinghai, enthused with a heavy dose of understatement during a rare tour of the mega-project.	Gu Bin, jeden z inžinierov zodpovedných za budovanie Longyangxia Dam solárny park v západnej provincii Qinghai, rozplýval sa silnou dávkou podhodnoteniu počas vzácneho prehliadke mega-projektom.	Gu Bin, jeden z inžinierov zodpovedných za budovanie solárneho parku Longyangxia Dam v západnej provincii Qinghai, sa rozplýval silnou dávkou podhodnotenia počas vzácnej prehliadky mega-projektu.	To boli slová Gu Bina, jedného z inžinierov zodpovedných za stavbu Longyangxieho priehradnej solárnej farmy v západnej provincii Qinghai, počas výnimočnej prehliadky tohto megalomanského projektu, ktoré však jeho úžas zďaleka nevystihli.	0.677	0.71	0.71	0.71	0.71	0.32	0.2	0.14	0.07	0.645	0.742	0.742	0.742	0.71	0.35	0.2	0.13	0.07	-0.032	0.032	0.032	0.032	0	0.03	0	-0.01	0	B
128	12	d128s12	The remote, 27-square-kilometre solar farm tops an ever-expanding roll call of supersized symbols that underline China’s determination to transform itself from climate villain to green superpower.	Diaľkové, 27 štvorcových kilometrov solárne farmy topy stále sa rozširujúcej role volanie superveľkých symbolov, ktoré zdôrazňujú Číny odhodlania transformovať seba od klimatických darebák na zelenú veľmoci.	V diaľke, 27 štvorcových kilometrov solárnej farmy je na vrchole stále sa rozširujúcej role zvýraznením superveľkých symbolov, ktoré zdôrazňujú odhodlanie Číny transformovať sa z klimatických darebákov na zelenú veľmoc.	Vzdialená solárna farma s rozlohou 27 km2 presahuje stále sa zväčšujúci zástup nadrozmerných symbolov, ktoré podčiarkujú odhodlanie Číny zmeniť sa z klimatického zloducha na zelenú veľmoc.	0.667	0.815	0.815	0.815	0.778	0.29	0.11	0	0	0.63	0.667	0.667	0.667	0.593	0.44	0.21	0.03	0	-0.037	-0.148	-0.148	-0.148	-0.185	0.15	0.1	0.03	0	B
128	13	d128s13	Built at a cost of about 6bn yuan (L721.3m) and in almost constant expansion since construction began in 2013, Longyangxia now has the capacity to produce a massive 850MW of power – enough to supply up to 200,000 households – and stands on the front line of a global photovoltaic revolution being spearheaded by a country that is also the world’s greatest polluter.	Postavený za cenu okolo 6 miliárd juanov (L 721,3 m) a takmer v neustálom rozširovaní, pretože stavba začala v roku 2013, Longyangxia má teraz schopnosť produkovať masívne 850MW energie - dosť dodávať až 200.000 domácností - a stojí na frontovej línii globálneho fotovoltaického revolúcia je v čele krajiny, ktorá je zároveň najväčšou znečisťovateľ na svete.	Stavba začala v roku 2013, postavená za cenu okolo 6 miliárd juanov (L 721,3m) a takmer neustále rozširovaná, Longyangxia má teraz schopnosť produkovať 850MW energie - dosť na dodávanie až do 200.000 domácností - a stojí v prvej línii globálnej fotovoltaickej revolúcie v čele krajiny, ktorá je zároveň najväčším znečisťovateľom na svete.	Farma bola postavená za približne 6 miliárd yenov (721,3 milióna libier) a takmer neustále rastie od začiatku jej výstavba v roku 2013. Longyangxia je momentálne schopná vyprodukovať 850MW energie, čo stačí na zásobovanie 200 000 domácností, a je na čele celosvetovej fotovoltaickej revolúcii vedenej krajinou, ktorá je zároveň svetovo najväčším znečisťovateľom prostredia.	0.635	0.788	0.788	0.788	0.712	0.41	0.14	0.05	0.01	0.5	0.808	0.808	0.808	0.712	0.5	0.19	0.06	0	-0.135	0.02	0.02	0.02	0	0.09	0.05	0.01	-0.01	B
128	14	d128s14	“The development of clean energy is very important if we are to keep the promises made in the Paris agreement,” Xie Xiaoping, the chairman of Huanghe Hydropower Development, the state-run company behind the park, said during an interview at its headquarters in Xining, the provincial capital.	"Vývoj čistej energie je veľmi dôležité, ak chceme dodržať sľuby urobené v dohode o Paríži," Xie Xiaoping, predseda Huanghe Vodná energia rozvoj, štátny podnik za parku, povedal počas rozhovoru v jeho sídle v Xining, hlavného mesta provincie.	"Vývoj čistej energie je veľmi dôležitý, ak chceme dodržať prísľuby v Parížskej dohode ," povedal počas rozhovoru Xie Xiaoping, predseda Rozvoja vodnej energie v Huanghe, štátnom podniku za parkom v sídle v Xining, hlavnom meste provincie .	„Rozvoj čistej energie je veľmi dôležitý ak splníme všetko čo sme sľúbili v Parížskej dohode,“ povedal Xie Xiaoping, predseda Huangheského hydroenergetického rozvoja, štátnej spoločnosti, ktorá stavia park, počas rozhovoru v ústredí Xining, hlavného mesta provincie.	0.571	0.629	0.629	0.629	0.571	0.48	0.27	0.17	0.05	0.571	0.714	0.714	0.714	0.6	0.55	0.24	0.13	0.08	0	0.085	0.085	0.085	0.029	0.07	-0.03	-0.04	0.03	B
128	15	d128s15	Xie said that unlike Donald Trump, a climate denier whose election as US president has alarmed scientists and campaigners, he was convinced global warming was a real and present danger that would wreak havoc on the world unless urgent action was taken.	Xie povedal, že na rozdiel od Donald Trump, klimatické popieračov, ktorého zvolenie americkým prezidentom bol zdesený vedci a aktivisti, bol presvedčený, globálne otepľovanie bola skutočná a prítomné nebezpečenstvo, že by spôsobiť katastrofu na svete, ak sa prijali naliehavé opatrenia.	Xie povedal, že na rozdiel od Donalda Trumpa, klimatického popierača, ktorého zvolenie za amerického prezidenta bolo zdesením pre vedcov a aktivistov, bol presvedčený, že globálne otepľovanie bolo skutočné a prítomné nebezpečenstvo, ktoré by spôsobilo katastrofu na svete, ak by sa neprijali naliehavé opatrenia.	Xie povedal, že na rozdiel od Donalda Trumpa, ktorý popiera klimatické zmeny, a ktorého zvolenie v amerických voľbách znepokojilo vedcov a účastníkov kampaní, je presvedčený, že globálne otepľovanie so sebou prináša hrozbu skutočného nebezpečenstva, ktoré môže spôsobiť chaos v celom svete, ak urýchlene nepodnikneme potrebné opatrenia.	0.587	0.63	0.63	0.63	0.63	0.43	0.17	0.09	0.07	0.543	0.63	0.63	0.63	0.609	0.47	0.28	0.18	0.14	-0.044	0	0	0	-0.021	0.04	0.11	0.09	0.07	B
129	1	d129s1	From Frankenstein to feminism: how electricity powered our imaginations	Od Frankenstein k feminizmu: Ako elektrinou poháňané naša predstavivosť	Od Frankensteina k feminizmu: Ako je elektrinou poháňaná naša predstavivosť	Od Frankensteina k feminizmu. Ako elektrina poháňa naše predstavy.	0.667	0.667	0.667	0.667	0.667	0.33	0	0	0	0.667	0.667	0.667	0.667	0.667	0.4	0.22	0.12	0	0	0	0	0	0	0.07	0.22	0.12	0	E
129	2	d129s2	A new exhibition charts the changing place of electricity in our lives, our homes and in literature	Nová expozícia grafy meniace Miesto elektrickej energie v našich životoch, naše domovy a v literatúre	Nová expozícia mapuje meniace sa miesto elektrickej energie v našich životoch, domovoch a v literatúre	Nová výstava mapuje meniace sa miesto elektriny v našich životoch, domovoch a v literatúre	0.429	0.5	0.5	0.5	0.5	0.6	0.28	0.15	0	0.214	0.214	0.214	0.214	0.214	0.8	0.64	0.53	0.41	-0.215	-0.286	-0.286	-0.286	-0.286	0.2	0.36	0.38	0.41	E
129	3	d129s3	I magine an invisible power.	Aj Magin neviditeľnú silu.	Predstavujem si neviditeľnú silu.	Predstavte si neviditeľnú silu.	0.5	0.5	0.5	0.5	0.25	0.5	0.33	0	0	0.25	0.25	0.25	0.25	0	0.75	0.66	0.5	0	-0.25	-0.25	-0.25	-0.25	-0.25	0.25	0.33	0.5	0	E
129	4	d129s4	A force that can affect the world at a great distance, cause damage and healing, bring objects to you, show you images of faraway lands, cast light in dark places, even – sometimes – bring the dead back to life.	Sila, ktorá môže mať vplyv na svet na veľkú vzdialenosť, spôsobiť poškodenie a liečenie, prinášajú predmety na vás, ukázať vám predstavy o ďalekých krajov, zliatinové svetlo v tmavých miestach, dokonca - občas - priviesť mŕtve späť k životu.	Sila, ktorá môže mať vplyv na svet na veľkú vzdialenosť, spôsobiť poškodenie a liečenie, prinášať vám predmety, ukázať vám ďaleké krajiny, zaliať svetlom tmavé miesta, dokonca - občas - priviesť mŕtvych späť k životu.	Silu, ktorá môže ovplyvniť svet na veľké vzdialenosti, ničiť i liečiť, priniesť vám predmety, ukázať ďaleké krajiny, osvetliť temné miesta, niekedy, dokonca oživiť mŕtvych.	1	1	1	1	0.833	0.26	0.05	0	0	0.917	0.958	0.958	0.958	0.708	0.41	0.15	0.03	0	-0.083	-0.042	-0.042	-0.042	-0.125	0.15	0.1	0.03	0	E
129	5	d129s5	There used to be a name for a force like that; the name was magic.	Tam býval meno pre platnosť takého; meno bolo mágie.	Existovalo meno pre tieto sily, bola to mágia.	Kedysi existovalo meno pre tieto sily - mágia.	0.875	0.875	0.875	0.875	0.75	0.33	0.12	0	0	0.25	0.375	0.375	0.375	0.375	0.75	0.57	0.5	0.4	-0.625	-0.5	-0.5	-0.5	-0.375	0.42	0.45	0.5	0.4	E
129	6	d129s6	But of course, that flexible, useful, intangible power has now been our servant for decades, in the form of electricity.	Ale samozrejme, že flexibilné, užitočné, nehmotné sila je teraz naším sluhom po celé desaťročia, vo forme elektrickej energie.	Ale samozrejme, že táto flexibilná, užitočná, nehmotná sila je naším sluhom po celé desaťročia, vo forme elektrickej energie.	Táto poddajná, užitočná, nehmotná sila nám slúži v podobe elektrickej energie po celé desaťročia.	0.857	1	1	1	0.786	0.33	0.17	0.06	0	0.643	1	1	1	0.643	0.5	0.29	0.12	0	-0.214	0	0	0	-0.143	0.17	0.12	0.06	0	E
129	7	d129s7	In my novel, The Power, I imagine the changes that come to pass when all of a sudden almost all the women in the world develop the power to electrify – and electrocute – people at will.	V mojom románe, sila, som si predstaviť, že zmeny, ktoré budú diať, keď zrazu takmer všetky ženy na svete vyvinúť silu elektrifikácia - a Electrocute - ľudí podľa ľubovôle.	V mojom románe, Sila, si predstavujem zmeny, ktoré sa budú diať, keď sa zrazu takmer u všetkých žien na svete vyvinie silu elektrifikácie a zelektrizovať ľudí podľa ľubovôle.	V mojom románe, The Power, opisujem zmeny, ktoré nastali po tom, čo takmer všetky ženy vo svete nadobudli moc, silou vôle, vytvárať elektrinu a zároveň ňou aj zraniť.	0.679	0.75	0.75	0.75	0.714	0.34	0.17	0.07	0	0.714	0.786	0.786	0.786	0.786	0.28	0.11	0.03	0	0.035	0.036	0.036	0.036	0.072	-0.06	-0.06	-0.04	0	E
129	8	d129s8	I liked the idea as soon as I thought of it; it seemed supple enough to bear some metaphorical weight, and less comic than giving women enormous muscles or the ability to emit poisonous gas from their nostrils.	Páčila sa mi predstava, akonáhle som o tom premýšľal; zdalo dosť niesť nejakú váhu metaforický vláčnu a menej komický než aby ženy obrovské svaly alebo schopnosť vysielať jedovatý plyn zo svojich nozdier.	Páčila sa mi tá predstava hneď od začiatku. Zdala sa dostatočná pre váhu metafory a menej komický než ženy s obrovskými svalmi alebo schopnosťou vysielať jedovatý plyn zo svojich nozdier.	Tento nápad sa mi ihneď zapáčil. Plný námetov pre metafory, zároveň nie taký komický, ako dať ženám obrovské svaly alebo schopnosť vylučovať jedovatý plyn nosnými dierkami.	0.885	0.923	0.923	0.923	0.692	0.28	0.16	0.06	0.03	0.923	0.962	0.962	0.962	0.808	0.23	0.06	0	0	0.038	0.039	0.039	0.039	0.116	-0.05	-0.1	-0.06	-0.03	E
129	9	d129s9	But the more I’ve learned about the history of electricity – fact and fiction – the more I’ve understood why the image of the electrified woman was such a perfect fit.	Ale čím viac som sa dozvedel o histórii elektriny - fakty a fikcia - čím viac som pochopil, prečo obraz elektrifikované ženy bol taký perfektný.	Ale čím viac som sa dozvedela o histórii elektriny, faktov i fikcie, tým viac som chápala, prečo obraz elektrifikovanej ženy bol taký perfektný.	Čím viac faktov a fikcie som sa dozvedela o histórii elektrickej energie, tým viac som vedela, že obraz ženy ovládajúcej elektrinu bol skvelou voľbou.	0.542	0.792	0.792	0.792	0.667	0.52	0.25	0	0	0.375	0.625	0.625	0.625	0.583	0.62	0.34	0.18	0.09	-0.167	-0.167	-0.167	-0.167	-0.084	0.1	0.09	0.18	0.09	E
129	10	d129s10	It’s about women and magic, about women’s liberation via the promise of the “electrified home”, and about the way that electric power makes the weak strong.	Je to o ženách a mágie, o oslobodenie žien cez prísľub "elektrifikované domácnosti", a o spôsobe, akým elektrickej energie činí slabé silné.	Je to o ženách a mágii, o oslobodení žien cez prísľub "elektrifikovaných domácností", a o spôsobe, akým elektrická energia činí slabých silnými.	Ide o tému ženy a mágie, o oslobodenie žien cez prísľub "elektrifikovaných domovov" a o tom ako elektrická energia robí slabých silnými.	0.545	0.591	0.591	0.591	0.545	0.45	0.33	0.25	0.21	0.409	0.455	0.455	0.455	0.409	0.59	0.28	0.1	0.05	-0.136	-0.136	-0.136	-0.136	-0.136	0.14	-0.05	-0.15	-0.16	E
129	11	d129s11	Although I hadn’t put this all together when I started work on the novel, I’m not the first person to imagine women’s empowerment as literally electric.	Aj keď som nemal dať to všetko dohromady, keď som začal pracovať na románe, nie som prvá osoba, ktorá má predstaviť posilnenie postavenia žien ako doslova elektrizujúca.	Aj keď som ešte nemala všetko pohromade, keď som začala pracovať na románe, nie som prvá osoba, ktorú predstava posilnenia postavenia žien doslova elektrizuje.	Hoci som v čase, keď som začala pracovať na románe, som nemala ešte kompletnú predstavu, nie som prvá, čo si predstavuje ženskú moc ako, doslova, elektrizujúcu.	0.577	0.808	0.808	0.808	0.654	0.44	0.26	0.08	0	0.462	0.692	0.692	0.692	0.615	0.53	0.32	0.2	0.13	-0.115	-0.116	-0.116	-0.116	-0.039	0.09	0.06	0.12	0.13	E
129	12	d129s12	There’s a new exhibition at the Wellcome Collection, entitled The Spark of Life, which deals with all of these themes.	K dispozícii je nová expozícia v Wellcome Collection pod názvom The iskra života, ktorá sa zaoberá všetkými týmito témami.	K dispozícii je nová expozícia vo Wellcome Collection pod názvom Iskra života, ktorá sa zaoberá všetkými týmito témami.	Nová výstava po záštitou Welcome collection, s názvom Iskra života (The Spark of Life) sa venuje všetkým týmto témam.	0.684	0.895	0.895	0.895	0.789	0.31	0.05	0	0	0.684	0.842	0.842	0.842	0.737	0.31	0.11	0.05	0	0	-0.053	-0.053	-0.053	-0.052	0	0.06	0.05	0	E
129	13	d129s13	It charts the changing place of electricity in our lives, our homes and our imaginations.	Mapuje meniace Namiesto elektrickej energie v našich životoch, našich domovov a našej predstavivosti.	Mapuje meniace sa miesto elektrickej energie v našich životoch, našich domovov a našej predstavivosti.	Mapuje meniace sa miesto elektriny v našich životoch, domovoch, v našej predstavivosti.	0.417	0.5	0.5	0.5	0.5	0.61	0.33	0.09	0	0.333	0.417	0.417	0.417	0.417	0.71	0.46	0.25	0.09	-0.084	-0.083	-0.083	-0.083	-0.083	0.1	0.13	0.16	0.09	E
129	14	d129s14	It brings together objects as diverse as a voltaic pile – an original form of the battery – posters advertising the new electrified kitchen, and images of pylons being pulled upright by horses.	Združuje objekty tak rozmanité ako galvanického článku - originálne podobu batérie - plagáty inzerujúca novú elektrifikovaná kuchyňu, a obrazy pylónov sa vytiahol vo vzpriamenej polohe koňmi.	Združuje rozmanité objekty, od galvanického článku, originálne podobu batérie, cez plagáty inzerujúce novú elektrifikovanú kuchyňu, po obrazy pylónov stavaných koňmi.	Združuje rôzne veci ako Voltov stĺp, čiže pôvodnú podobu batérie, plagáty nových elektrifikovaných kuchýň a obrazy elektrických stĺpov stavaných koňmi.	0.9	0.9	0.9	0.9	0.8	0.3	0.08	0	0	0.65	0.75	0.75	0.75	0.75	0.35	0.1	0	0	-0.25	-0.15	-0.15	-0.15	-0.05	0.05	0.02	0	0	E
129	15	d129s15	These objects make that most mundane of events, flicking a switch, turning on a light, seem once again strange, wonderful … and ever so slightly magical.	Tieto objekty robiť, že väčšina všedný udalostí, oháňal prepínač, zapnutím svetla, zdajú sa opäť podivné, úžasné ... a niekedy tak trochu čarovné.	Tieto objekty robia väčšinu všedných udalostí ako vypínanie a zapínanie svetla, opäť podivnými, úžasnými ... a niekedy tak trochu čarovnými.	To umožňuje znovu vidieť tie nejbežnejšie činnosti, cvaknutie vypínača, zapnutie svetla, ako zvláštne, nádherné a niekedy aj trochu čarovné.	0.895	0.895	0.895	0.895	0.737	0.22	0.09	0	0	0.789	0.842	0.842	0.842	0.789	0.3	0.05	0	0	-0.106	-0.053	-0.053	-0.053	0.052	0.08	-0.04	0	0	E
129	16	d129s16	https://www.theguardian.com/science/the-h-word/2015/feb/18/alessandro-volta-anniversary-electricity-history-science	https://www.theguardian.com/science/the-h-word/2015/feb/18/alessandro-volta-anniversary-electricity-history-science	https://www.theguardian.com/science/the-h-word/2015/feb/18/alessandro-volta-anniversary-electricity-history-science	https://www.theguardian.com/science/the-h-word/2015/feb/18/alessandro-volta-anniversary-electricity-history-science	0	0	0	0	0	1	0	0	0	0	0	0	0	0	1	0	0	0	0	0	0	0	0	0	0	0	0	E
129	16	d129s16	https://www.theguardian.com/science/the-h-word/2015/feb/18/alessandro-volta-anniversary-electricity-history-science	https://www.theguardian.com/science/the-h-word/2015/feb/18/alessandro-volta-anniversary-electricity-history-science	https://www.theguardian.com/science/the-h-word/2015/feb/18/alessandro-volta-anniversary-electricity-history-science	https://www.theguardian.com/science/the-h-word/2015/feb/18/alessandro-volta-anniversary-electricity-history-science	0	0	0	0	0	1	0	0	0	0	0	0	0	0	1	0	0	0	0	0	0	0	0	0	0	0	0	E
130	1	d130s1	My life is full of religion and education – but no men	Môj život je plný náboženstvo a vzdelanie - ale žiadni muži	Môj život je plný náboženstva a vzdelania - ale žiadnych mužov	Veľa vedomostí a viery, ale málo mužov.	1	1	1	1	0.857	0.18	0	0	0	1	1	1	1	0.857	0.18	0	0	0	0	0	0	0	0	0	0	0	0	C
130	2	d130s2	The dilemma I think I am having a midlife crisis – at 27.	dilema Myslím, že som s krízy stredného veku - na 27.	Dilema myslím, že som v kríze stredného veku - v 27.	Mám 27 a trápi ma kríza stredného veku.	1	1	1	1	0.75	0.27	0.1	0	0	1	1	1	1	0.75	0.27	0.1	0	0	0	0	0	0	0	0	0	0	0	C
130	3	d130s3	I was brought up in a Victorian girls-only school with nuns, and my parents were extremely conservative.	Bol som vychovaný vo viktoriánskej dievčatá-jediná škola s mníškami, a moji rodičia boli veľmi konzervatívne.	Bola som vychovaná vo viktoriánskej dievčenskej škole mníškami, a moji rodičia boli veľmi konzervatívni.	Navštevovala som Viktoriánsku dievčenskú školu, v ktorej ma vychovávali mníšky, aj moji rodičia boli veľmi konzervatívni.	0.688	0.688	0.688	0.688	0.625	0.31	0.2	0.14	0.07	0.625	0.625	0.625	0.625	0.563	0.37	0.26	0.21	0.15	-0.063	-0.063	-0.063	-0.063	-0.062	0.06	0.06	0.07	0.08	C
130	4	d130s4	I graduated from university with top honours.	Vyštudovala som vysokú školu s vyznamenaním.	Vyštudovala som vysokú školu s vyznamenaním.	Školu som skončila s vyznamenaním.	0.4	0.6	0.6	0.6	0.4	0.66	0.2	0	0	0.4	0.6	0.6	0.6	0.4	0.66	0.2	0	0	0	0	0	0	0	0	0	0	0	C
130	5	d130s5	A master’s degree with merit and distinction followed.	Magisterský stupeň sa zásluh a rozlíšenie nasledoval.	Nasledoval magisterský stupeň so zásluhou a pochvala.	Potom nasledoval magisterský stupeň s pochvalou a vyznamenaním.	0.5	0.75	0.75	0.75	0.75	0.5	0.14	0	0	0.5	0.5	0.5	0.5	0.5	0.5	0.29	0.17	0	0	-0.25	-0.25	-0.25	-0.25	0	0.15	0.17	0	C
130	6	d130s6	This should make me happy, but I am starting to hate my life because I have no boyfriends.	To by mi radosť, ale ja začínam nenávidieť svoj život, pretože nemám milencov.	To by mi malo radosť, ale ja začínam nenávidieť svoj život, pretože nemám milencov.	Mala by som byť šťastná, ale namiesto toho stále viac neznášam svoj život. Chýba mi mužská spoločnosť.	0.706	0.765	0.765	0.765	0.706	0.29	0.06	0	0	0.706	0.765	0.765	0.765	0.706	0.29	0.06	0	0	0	0	0	0	0	0	0	0	0	C
130	7	d130s7	I cannot differentiate between lust, love and crush!	Nemôžem rozlíšiť chtíč, lásky a zamilovanosti!	Nedokážem rozlíšiť chtíč, lásku a zamilovanosť!	Nedokážem rozlišovať túžbu, lásku a sympatie.	0.833	0.833	0.833	0.833	0.667	0.16	0	0	0	0.5	0.5	0.5	0.5	0.5	0.5	0.2	0	0	-0.333	-0.333	-0.333	-0.333	-0.167	0.34	0.2	0	0	C
130	7	d130s7	I cannot differentiate between lust, love and crush!	Nemôžem rozlíšiť chtíč, lásky a zamilovanosti!	Nedokážem rozlíšiť chtíč, lásku a zamilovanosť!	Nedokážem rozlišovať túžbu, lásku a sympatie.	0.833	0.833	0.833	0.833	0.667	0.16	0	0	0	0.5	0.5	0.5	0.5	0.5	0.5	0.2	0	0	-0.333	-0.333	-0.333	-0.333	-0.167	0.34	0.2	0	0	C
130	8	d130s8	I was engaged once to a promiscuous man whom I loved madly.	Raz som bol zapojený do promiskuitného muža, ktorého som miloval šialene.	Raz som bola zasnúbená s promiskuitným mužom, ktorého som milovala šialene.	Bola som zasnúbená s promiskuitným chlapom, šialene som ho milovala.	0.8	0.9	0.9	0.9	0.8	0.27	0	0	0	0.3	0.6	0.6	0.6	0.5	0.72	0.2	0.11	0	-0.5	-0.3	-0.3	-0.3	-0.3	0.45	0.2	0.11	0	C
130	9	d130s9	I feel isolated and alienated.	Cítim sa izolovaný a odcudzení.	Cítim sa izolovaná a odcudzená.	No trápil ma pocit samoty a odcudzenia.	0.857	0.857	0.857	0.857	0.714	0.14	0	0	0	0.857	0.857	0.857	0.857	0.714	0.14	0	0	0	0	0	0	0	0	0	0	0	0	C
130	10	d130s10	Girls reach my age with numerous adventures and I feel that if I had had multiple boyfriends, I would have been happier.	Dievčatá dosahujú môjho veku s početnými dobrodružstvách a mám pocit, že keby som mal viac milencov, bol by som šťastnejší.	Dievčatá dosahujú môjho veku s početnými dobrodružstvami a mám pocit, že keby som mala viac milencov, bola by som šťastnejšia.	Dievčatá v mojom veku zažívajú rôzne dobrodružstvá. Cítim, že ak by som mala viac milencov, bola by som šťastnejšia.	0.579	0.684	0.684	0.684	0.632	0.4	0.1	0	0	0.421	0.526	0.526	0.526	0.474	0.55	0.36	0.33	0.29	-0.158	-0.158	-0.158	-0.158	-0.158	0.15	0.26	0.33	0.29	C
130	11	d130s11	I have crushes on almost every man I meet, even my violin tutor who is eight years my junior.	Mám drví na takmer každého človeka stretnem, dokonca aj svoje husle lektorom, ktorý je osem rokov môj juniorský.	Je mi sympatický takmer každý človek, ktorého stretnem, dokonca aj môj lektor huslí, ktorý je o osem rokov odo mňa mladší.	Je mi sympatický každý chlap, ktorého stretnem, dokonca aj môj učiteľ huslí, ktorý je odo mňa mladší o 8 rokov.	0.6	0.75	0.75	0.75	0.7	0.35	0.15	0.05	0	0.2	0.45	0.45	0.45	0.35	0.8	0.5	0.31	0.11	-0.4	-0.3	-0.3	-0.3	-0.35	0.45	0.35	0.26	0.11	C
130	12	d130s12	Having sex before marriage is against my family and Christian beliefs, but I am dying to live as other girls do.	Mať sex pred manželstvom je proti mojej rodine a kresťanskej viery, ale ja umieram žiť ako ostatné dievčatá robiť.	Mať sex pred manželstvom je proti mojej rodine a kresťanskej viere, ale ja umieram od túžby žiť ako ostatné dievčatá.	Pre moju rodinu je predmanželský sex tabu, ale ja netúžim žiť ako ostatné dievčatá.	0.786	0.857	0.857	0.857	0.571	0.42	0.22	0.11	0.06	0.857	0.929	0.929	0.929	0.571	0.4	0.21	0.11	0.05	0.071	0.072	0.072	0.072	0	-0.02	-0.01	0	-0.01	C
130	13	d130s13	Mariella replies That’s not a midlife crisis.	Mariella odpovie To nie je kríza stredného veku.	Mariella odpovie To nie je kríza stredného veku.	Mariella odpovedá. Toto nie je kríza stredného veku.	0.25	0.25	0.25	0.25	0.25	0.75	0.57	0.5	0.4	0.25	0.25	0.25	0.25	0.25	0.75	0.57	0.5	0.4	0	0	0	0	0	0	0	0	0	C
130	14	d130s14	That’s just growing up, which is an exercise in perpetual evolution if you’re doing it right.	To je práve vyrastá, čo je cvičenie v neustálom vývoji, ak to robíte správne.	To je len dospievanie, čo je cvičenie v neustálom vývoji, ak to robíte správne.	Je to len dospievanie, ak viete ako na to, stáva sa z toho neustály vývoj.	0.733	0.933	0.933	0.933	0.867	0.33	0	0	0	0.6	0.867	0.867	0.867	0.733	0.46	0.07	0	0	-0.133	-0.066	-0.066	-0.066	-0.134	0.13	0.07	0	0	C
130	15	d130s15	Judging by the values you’ve inherited, and had foisted on you, you’ve been an impeccable daughter and have rewarded your parents for their investment in your education.	Súdiac podľa hodnôt, ktoré ste zdedili, a mal vnuceného vás, že ste bol bezvadný dcéra a odmenila svojim rodičom za ich investície do svojho vzdelania.	Súdiac podľa hodnôt, ktoré ste zdedili, a vnucovali do vás, že ste bola vzorná dcéra a odmenila svojim rodičom za ich investície do vášho vzdelania.	Posudzujete ľudí na základe hodnôt, ktoré vám vštepili a vnucovali. Boli ste vzornou dcérou a vážili ste si svojich rodičov, pretože vám financovali vzdelávanie.	0.792	0.917	0.917	0.917	0.833	0.24	0.04	0	0	0.75	0.875	0.875	0.875	0.792	0.28	0.08	0	0	-0.042	-0.042	-0.042	-0.042	-0.041	0.04	0.04	0	0	C
130	16	d130s16	Luckily, however, we live in a free world and you can now choose the life you want to lead, the values you cherish and the boundaries of your own morality.	Našťastie však žijeme v slobodnom svete a teraz si môžete vybrať život, ktorý chcete viesť, hodnoty, ktoré pestovať a hranice svoje vlastné morálky.	Našťastie však žijeme v slobodnom svete a teraz si môžete vybrať život, ktorý chcete viesť, hodnoty, ktoré chcete pestovať a hranice svojej vlastnej morálky.	Ale našťastie žijeme vo svete slobody a vy máte možnosť vybrať si vlastnú cestu životom, hodnoty, ktoré si vážite a hranice vlastných zásad.	0.522	0.739	0.739	0.739	0.696	0.43	0.09	0	0	0.565	0.739	0.739	0.739	0.696	0.41	0.08	0	0	0.043	0	0	0	0	-0.02	-0.01	0	0	C
130	18	d130s18	It’s worth mentioning that, for a brief period in my teens, feeling lost, alone and trying to fit in among my Catholic contemporaries, I did start sneaking off to mass, and would stay at school late to attend folk rock prayer meetings.	Za zmienku stojí, že pre krátke obdobie v mojom dospievania, cítil stratený, sám a snaží sa zapadnúť medzi svojich vrstovníkov katolíckych, som sa začať tajne off na omšu, a zostane v škole neskoro zúčastňovať sa na schôdzach folk rockové modlitebné.	Za zmienku stojí, že za krátke obdobie v mojom dospievaní, cítila som sa stratená, sama a snažila sa zapadnúť medzi svojich katolíckych rovesníkov,začala som tajne chodiť na omšu, a zostávala v škole neskoro, aby som sa zúčastňovala na folk rockových modlitebných stretnutiach.	Stojí za mienku spomenúť, že istú dobu počas svojho dospievania, som sa cítila beznádejne, osamelo a snažila som sa zapadnúť medzi svojich rovesníkov-katolíkov. Prestala som chodiť na omše a ostávala som v škole dlhšie, aby som sa mohla zúčastňovať modlitebných folklórno-rockových stretnutí.	0.5	0.762	0.762	0.762	0.714	0.45	0.12	0.05	0.02	0.452	0.667	0.667	0.667	0.619	0.58	0.19	0.07	0.02	-0.048	-0.095	-0.095	-0.095	-0.095	0.13	0.07	0.02	0	C
130	19	d130s19	My horrified atheist parents caught me in my extracurricular worship and banned me from further immersion in Bible-bashing rock and attending church.	Moji zdesení ateistické rodičia ma chytili v mojej mimoškolské uctievanie a zakázal mi z ďalšieho ponorenie do Biblie-mlátiť skalu a navštevovať kostol.	Moji zdesení ateistickí rodičia ma prichytili pri mojom mimoškolskom uctievaní a zakázali mi ďalšie ponorenie do Biblie - odhodiť rock a navštevovať kostol.	Mojich rodičov - ateistov, to vydesilo. Prichytili ma na jednej mimoškolskej omši a zakázali mi čítať bibliu, rock a navštevovanie kostola.	0.857	1	1	1	0.857	0.18	0	0	0	0.714	0.905	0.905	0.905	0.714	0.34	0.13	0.04	0	-0.143	-0.095	-0.095	-0.095	-0.143	0.16	0.13	0.04	0	C
130	20	d130s20	I say all this to reassure you that there are many ways to live your life, endless opportunities to rebel and a very long time in which to change your opinions, many times over.	Hovorím to všetko, aby vás uistiť, že existuje mnoho spôsobov, ako žiť svoj život, nekonečné možnosti búriť a veľmi dlhá doba na to, aby zmeniť svoje názory, mnohokrát cez.	Hovorím to všetko, aby som vás uistila, že existuje mnoho spôsobov, ako žiť svoj život, nekonečné možnosti búriť sa a veľmi dlhá doba na to, aby ste zmenili svoje názory, mnohokrát.	Hovorím to preto, aby som vás uistila, že existuje veľa spôsobov, ako si užívať život. Máte nekonečné množstvo príležitostí na vzoprenie sa a veľmi veľa času na menenie svojich názorov stále dookola.	0.563	0.656	0.656	0.656	0.625	0.46	0.12	0	0	0.469	0.563	0.563	0.563	0.531	0.56	0.29	0.16	0.1	-0.094	-0.093	-0.093	-0.093	-0.094	0.1	0.17	0.16	0.1	C
130	21	d130s21	You sound like you’ve been immersed in your studies and could do with letting off some steam – but don’t let it be fuelled by misplaced notions of how the other half lives.	Hovoríš ako ste boli ponorení do svojich štúdiách a mohol robiť s nechať niektoré páry - ale nenechajte malo byť poháňaný stratená predstavy o tom, ako ostatní polčasy.	Hovoríte ako by ste boli ponorení do svojich štúdií a mohli ich robiť s uvoľnením - ale nenechajte, aby to poháňalo vaše stratené predstavy o tom, ako žijú ostatní.	Vyzerá to, ako by ste boli ponorená do svojho štúdia a nič vás v tom nedokázalo zastaviť - ale nenechajte sa poháňať mylnými predstavami o tom, ako žijú ostatní.	0.552	0.655	0.655	0.655	0.621	0.41	0.17	0.07	0	0.448	0.586	0.586	0.586	0.517	0.51	0.32	0.22	0.11	-0.104	-0.069	-0.069	-0.069	-0.104	0.1	0.15	0.15	0.11	C
131	2	d131s2	More than 300 LA flights cancelled and hundreds of homes evacuated over mud slide fears in one of state’s strongest storms in years	Viac ako 300 LA zrušených letov a stovky domov evakuovaní cez bahenné klzných obáv v jednom z najsilnejších búrok štátu v rokoch	Viac ako 300 zrušených letov v LA a stovky evakuovaných domácnosí z dôvodu jednej z najsilnejších búrok v štáte	Jedna z najsilnejších búrok za posledné roky má za následok viac než 300 zrušených letov v Los Angeles a stovky evakuovaných domácností z dôvodu možných zosuvov bahna.	0.593	0.963	0.963	0.963	0.815	0.4	0.15	0.04	0	0.519	0.741	0.741	0.741	0.63	0.51	0.31	0.16	0.04	-0.074	-0.222	-0.222	-0.222	-0.185	0.11	0.16	0.12	0.04	B
131	3	d131s3	A firefighter carries a woman from her car after it was caught in street flooding.	Hasič nesie ženu od jej aute po tom, čo bol chytený v ulici povodní.	Hasič nesie ženu z jej auta po tom, ako uviazla v povodni.	Hasič zachraňuje ženu z auta po tom, ako uviazla v prívale vody na ulici.	0.571	0.786	0.786	0.786	0.786	0.42	0.07	0	0	0.357	0.429	0.429	0.429	0.429	0.64	0.46	0.34	0.28	-0.214	-0.357	-0.357	-0.357	-0.357	0.22	0.39	0.34	0.28	B
131	4	d131s4	Photograph:	fotografie:	fotografia:	Fotografia:	1	1	1	1	0	0	0	0	0	0	0	0	0	0	1	0	0	0	-1	-1	-1	-1	0	1	0	0	0	B
131	6	d131s6	Saturday 18 February 2017 09.52 GMT	Sobota 18.február 2017 09,52 GMT	Sobota 18.február 2017 09,52 GMT	sobota 18. februára 2017	0.75	1	1	1	0.75	0.4	0	0	0	0.75	1	1	1	0.75	0.4	0	0	0	0	0	0	0	0	0	0	0	0	B
131	7	d131s7	At least two people have died after one of California’s strongest storms in years brought torrential rain and flash floods to the state.	Najmenej dvaja ľudia zomreli po jednom z kalifornských najsilnejších búrok v rokoch priniesli prívalové dažde a záplavy štátu.	Najmenej dvaja ľudia zomreli po tom,ako jedna z najsilnejších kalifornských búrok priniesla prívalové dažde a záplavy.	Jedna z najsilnejších kalifornských búrok za posledné roky, sprevádzaná prívalovým dažďom a povodňami, priniesla minimálne dve obete.	0.765	1	1	1	0.824	0.27	0	0	0	0.647	1	1	1	0.765	0.38	0.17	0.12	0.06	-0.118	0	0	0	-0.059	0.11	0.17	0.12	0.06	B
131	8	d131s8	More than 100 homes have been evacuated over fears of mud slides near Los Angeles after the pacific storm, dubbed a “bombogenesis” or “weather bomb”, parked itself over southern California, opening sinkholes and cutting power to thousands of people.	Viac ako 100 domov bolo evakuovaných cez obavy z bahna snímok blízko Los Angeles po pacifiku búrke, daboval "bombogenesis" alebo "počasie bombu", zaparkované seba cez južnej Kalifornii, otvoril závrty a prerušenia prívodu energie tisícom ľudí.	Viac ako 100 domov bolo evakuovaných z dôvodu možných zosuvov bahna v blízkosti Los Angeles po tichomorskej búrke, prezývanej "bombogenesis" alebo "bomba počasia ", ktorá zasiahla južnú Kaliforniu, vytvárajúc diery v pôde a spôsobujúc odstávky energie.	Viac ako 100 domácností bolo evakuovaných z dôvodu možných zosuvov bahna v blízkosti Los Angeles po tichomorskej búrke, prezývanej aj „bombogenéza“ alebo „bomba počasia“, ktorá zasiahla južnú Kaliforniu a spôsobila diery v pôde, a zanechala tisíce obyvateľov bez dodávky elektriny.	0.659	0.707	0.707	0.707	0.707	0.31	0.12	0.05	0	0.293	0.366	0.366	0.366	0.366	0.68	0.55	0.46	0.37	-0.366	-0.341	-0.341	-0.341	-0.341	0.37	0.43	0.41	0.37	B
131	9	d131s9	https://www.theguardian.com/us-news/california	https://www.theguardian.com/us-news/california	https://www.theguardian.com/us-news/california	https://www.theguardian.com/us-news/california	0	0	1	0	0	1	0	0	0	0	0	1	0	0	1	0	0	0	0	0	0	0	0	0	0	0	0	B
131	10	d131s10	More than 300 flights at Los Angeles international airport have also been cancelled or delayed.	Viac ako 300 rokmi v Los Angeles medzinárodné letisko boli tiež zrušené alebo odložené.	Viac ako 300 letov na medzinárodnom letisku v Los Angeles bolo tiež zrušených alebo odložených.	Viac než 300 letov na medzinárodnom letisku v Los Angeles bolo zrušených alebo mali meškanie.	0.6	0.8	0.8	0.8	0.667	0.4	0.14	0.07	0	0.333	0.4	0.4	0.4	0.4	0.7	0.43	0.26	0.14	-0.267	-0.4	-0.4	-0.4	-0.267	0.3	0.29	0.19	0.14	B
131	11	d131s11	The storm stretched far out into the ocean and was at its strongest late on Friday afternoon.	Búrka tiahla ďaleko do oceánu a bola u jeho najsilnejšia neskoro v piatok popoludní.	Búrka sa tiahla ďaleko do oceánu a najintenzívnejšia bola v piatok popoludní.	Búrka sa ťahala do diaľky až po oceán a najväčšiu intenzitu dosiahla v piatok popoludní.	0.6	0.667	0.667	0.667	0.667	0.4	0.14	0.07	0	0.533	0.6	0.6	0.6	0.6	0.46	0.21	0.08	0	-0.067	-0.067	-0.067	-0.067	-0.067	0.06	0.07	0.01	0	B
131	12	d131s12	It is expected to last until Saturday afternoon.	Očakáva sa, že trvať až do sobotňajšieho popoludnia.	Očakáva sa, že bude trvať až do sobotňajšieho popoludnia.	Očakáva sa, že bude trvať až do sobotného popoludnia.	0.222	0.222	0.222	0.222	0.222	0.77	0.5	0.29	0	0.111	0.111	0.111	0.111	0.111	0.88	0.75	0.71	0.66	-0.111	-0.111	-0.111	-0.111	-0.111	0.11	0.25	0.42	0.66	B
131	13	d131s13	One man was found dead in a submerged vehicle in the desert town of Victorville after several cars were washed down a flooded street, San Bernardino county fire spokesman Eric Sherwin said.	Jeden muž bol nájdený mŕtvy v ponorené vozidla v púštnom meste Victorville po niekoľkých vozy boli spláchol zatopenej ulici, povedal San Bernardino County Hasičský hovorca Eric Sherwin.	Jeden muž bol nájdený mŕtvy v ponorenom vozidle v púštnom meste Victorville po tom, ako bolo niekoľko vozidiel zmietnutých záplavami povedal hasičský hovorca San Bernardino County Eric Sherwin.	Podľa hovorcu hasičského zboru okresu San Bernardino Erica Sherwina bol v opustenom meste Victorville v zaplavenom vozidle nájdený mŕtvy muž po tom, ako boli viaceré autá zmietnuté záplavami.	0.571	0.929	0.929	0.929	0.821	0.42	0.11	0	0	0.5	1	1	1	0.714	0.51	0.17	0.03	0	-0.071	0.071	0.071	0.071	-0.107	0.09	0.06	0.03	0	B
131	14	d131s14	A second man was electrocuted in the Sherman Oaks area of LA when a tree falling in heavy rain downed power lines that hit a car.	Druhý muž bol elektrickým prúdom v oblasti Sherman Oaks LA keď strom padajúci v hustom daždi zostrelil elektrické vedenie, ktoré zasiahli auto.	Druhý muž bol zasiahnutý elektrickým prúdom v oblasti Sherman Oaks LA,po tom ako strom padajúci v hustom daždi zhodil elektrické vedenie, ktoré zasiahlo auto.	Druhý muž zomrel v Sherman Oaks v blízkosti Los Angeles v dôsledku zasiahnutia elektrickým prúdom po tom, ako pád stromu v silnej búrke spôsobil kontakt elektrického vedenia s autom.	0.655	0.862	0.862	0.862	0.828	0.27	0.1	0	0	0.586	0.793	0.793	0.793	0.793	0.34	0.14	0	0	-0.069	-0.069	-0.069	-0.069	-0.035	0.07	0.04	0	0	B
131	15	d131s15	Later in the same neighbourhood, a sinkhole swallowed two cars, the second on live TV as viewers watched it teeter on the edge before plunging in.	Neskôr v rovnakej štvrti, je závrty prehltnúť dve autá, druhý v živom televíznom vysielaní, ako diváci ju sledoval balansovať na hrane pred vrhať v.	Neskôr v rovnakej štvrti, pohltila diera dve autá, druhé v živom televíznom vysielaní, zatiaľ čo diváci ho sledovali balansovať na hrane pred tým, ako bolo vtiahnuté.	O niečo neskôr v tej istej oblasti pohltila diera na ceste dve autá, pričom pád druhého auta zaznamenali televízne kamery v priamom prenose a diváci tak mali možnosť sledovať, ako vozidlo balansovalo na okraji jamy pred tým, ako bolo nakoniec vtiahnuté dovnútra.	0.738	0.833	0.833	0.833	0.833	0.23	0.04	0	0	0.619	0.69	0.69	0.69	0.69	0.33	0.14	0.05	0.02	-0.119	-0.143	-0.143	-0.143	-0.143	0.1	0.1	0.05	0.02	B
131	16	d131s16	Firefighters rescued one person from the first car, and the driver escaped from the second vehicle before it fell into the hole.	Hasiči zachránili jednu osobu od prvého vozidla a vodič ušiel z druhého vozidla pred tým, než sa dostal do diera.	Hasiči zachránili jednu osobu z prvého vozidla a vodič ušiel z druhého vozidla pred tým, než spadlo do diery.	Hasiči zachránili osobu z prvého vozidla a vodičovi z druhého vozidla sa podarilo utiecť tesne predtým, ako samotné vozidlo spadlo do diery.	0.455	0.636	0.636	0.636	0.636	0.5	0.23	0.1	0	0.409	0.5	0.5	0.5	0.5	0.59	0.43	0.25	0.1	-0.046	-0.136	-0.136	-0.136	-0.136	0.09	0.2	0.15	0.1	B
131	17	d131s17	Inland at the Cajon Pass, the shoulder of a road crumbled and sent a parked fire truck spilling over the side, but no one was injured.	Vo vnútrozemí v Cajon Pass, rameno cesty rozpadol a poslal zaparkovaného hasičský voz rozliatiu cez okraj, ale nikto nebol zranený.	Vo vnútrozemí v Cajon Pass, sa rameno cesty rozpadlo a vykolajilo zaparkované hasičské vozidlo, ale nikto sa nezranil.	Vo vnútrozemskom Cajon Pass sa rozpadla krajnica cesty a hasičské vozidlo, ktoré na nej bolo zaparkované, sa zrútilo na stranu, ale nikto nebol zranený.	0.625	0.708	0.708	0.708	0.708	0.37	0.17	0.09	0.04	0.5	0.708	0.708	0.708	0.708	0.5	0.17	0.04	0	-0.125	0	0	0	0	0.13	0	-0.05	-0.04	B
131	18	d131s18	In LA’s Sun Valley, 10 cars were trapped in swift-moving water on a road and 15 people had to be rescued.	V LA Sun Valley, 10 vozy boli uväznení v rýchlom sa pohybujúce vody na ceste a 15 ľudí muselo byť zachránené.	V LA Sun Valley, bolo 10 vozidiel uväznených v rýchlo sapohybujúcej vode na ceste a 15 ľudí muselo byť zachránených.	V losangelskom Sun Valley bolo vo valiacej sa vode uväznených 10 áut a pätnástich ľudí sa podarilo vyslobodiť.	0.722	0.833	0.833	0.833	0.722	0.38	0.05	0	0	0.611	0.778	0.778	0.778	0.667	0.5	0.1	0.05	0	-0.111	-0.055	-0.055	-0.055	-0.055	0.12	0.05	0.05	0	B
132	1	d132s1	The most expensive library in the world?	Najdrahšie knižnica na svete?	Najdrahšie knižnica na svete?	Najdrahšia knižnica na svete?	0.25	0.25	0.25	0.25	0	0.75	0.66	0.5	0	0.25	0.25	0.25	0.25	0	0.75	0.66	0.5	0	0	0	0	0	0	0	0	0	0	E
132	2	d132s2	Book Capella opens for Russian elite	Book Capella otvára pre ruskú elitu	Knižnica Book Capella otvára pre ruskú elitu	Knižnaja Kapella otvára svoje brány pre ruskú elitu	0.5	0.5	0.5	0.5	0.375	0.5	0.3	0.18	0	0.5	0.625	0.625	0.625	0.5	0.5	0.29	0.17	0	0	0.125	0.125	0.125	0.125	0	-0.01	-0.01	0	E
132	3	d132s3	Charging around L100 per visit to its pricey collection, it’s not clear if this is an actual library or just a novel spot for wealthy Russians to hold meetings.	Nabíjanie okolo L 100 za návštevu jej drahý zbierky, to nie je jasné, či ide o skutočný knižnicu alebo len nový spot pre bohatí Rusi organizovať stretnutia.	Knižničný poplatok za návštevu jej drahej zbierky je L 100 , nie je však jasné, či ide o skutočnú knižnicu alebo je to len nové miesto pre stretnutia pre bohatých Rusov.	Knižnica si za jednu návštevu svojej drahej kolekcie pýta účtuje 100 libier. Nie je jasné, či je to knižnica alebo len neobvyklé miesto stretávania sa bohatých Rusov.	0.593	0.852	0.852	0.852	0.778	0.37	0.15	0.08	0.04	0.667	0.778	0.778	0.778	0.593	0.48	0.12	0	0	0.074	-0.074	-0.074	-0.074	-0.185	0.11	-0.03	-0.08	-0.04	E
132	4	d132s4	Tapestries , leather armchairs, candelabras, sculpted woodwork and figures of the apostles:	Tapisérie, koženými kreslami, svietniky, vyrezávané z dreva a postavy apoštolov:	Gobelíny, kožené kreslá, svietniky, vyrezávané drevené časti a postavy apoštolov:	Gobelíny, kožené kreslá, svietniky, sochy z dreva a postavy apoštolov.	0.5	0.5	0.5	0.5	0.4	0.5	0.33	0.25	0.14	0.4	0.4	0.4	0.4	0.4	0.6	0.44	0.25	0.14	-0.1	-0.1	-0.1	-0.1	0	0.1	0.11	0	0	E
132	5	d132s5	Book Capella, a newly built, gothic-inspired library in central St Petersburg, is complete with all the expected luxuries of an ancient athenaeum – and a price tag to match.	Book Capella, novo postavený, gotický-inšpiroval knižnica v centre Petrohradu, je kompletný so všetkými očakávanými luxus starovekého Athenaeum - a cenovka, aby zodpovedal.	Book Capella je novo postavená, gotický-inšpiroval knižnica v centre Petrohradu. Dokončili ju podľa všetkých očakávaní luxusnej starovekej univerzity Athenaeum, čomu zodpovedá aj suma.	Knižnaja Kapella je novo vybudovaná, goticky inšpirovaná knižnica V Sant Peterburgu. Dokončili ju podľa všetkých očakávaní luxusnej starovekej univerzity Antheneum, čomu zodpovedá aj cena.	0.833	0.875	0.875	0.875	0.833	0.16	0.04	0	0	0.375	0.375	0.375	0.375	0.333	0.62	0.47	0.31	0.23	-0.458	-0.5	-0.5	-0.5	-0.5	0.46	0.43	0.31	0.23	E
132	6	d132s6	To enjoy the library’s collection and atmosphere, you have to pay a ticket of just under L100 for a four-hour reading session – a markedly different experience to the free access readers can enjoy in Russia’s public libraries.	Ak chcete využívať knižnicu zbierku a atmosféru, budete musieť zaplatiť cestovný lístok tesne pod 100 L pre čítanie relácii štvorhodinovej - výrazne odlišné skúsenosti s čitateľmi bezplatný prístup teraz v ruskom verejných knižniciach.	Ak si chcete vychutnať jej knižnú zbierku a atmosféru, budete musieť zaplatiť za štvorhodinový vstup tesne pod 100 L. Pre čitateľov je to výrazne odlišná skúsenosť oproti bezplatnému vstupu do verejných knižníc.	Na to aby ste si vychutnali jej kolekciu a atmosféru, musíte za štvorhodinový vstup zaplatiť sumu takmer 100 libier, čo je v porovnaní s bezplatným vstupom v ruských verejných knižniciach výrazný rozdiel.	0.75	0.969	0.969	0.969	0.813	0.24	0.06	0	0	0.656	0.906	0.906	0.906	0.844	0.36	0.06	0	0	-0.094	-0.063	-0.063	-0.063	0.031	0.12	0	0	0	E
132	7	d132s7	Book Capella’s 5,000-odd book collection is entirely published by St Petersburg-based publishing house Alfaret – also the owner and initiator of the project.	5000-nepárna kolekcie v knihe Capella je úplne publikovaný St Petersburg báze nakladateľstvo Alfaret - tiež vlastníkom a iniciátor projektu.	Knižná kolekcia Book Cappela má okolo 5000 kníh, ktoré sú publikované nakladateľstvom Alfaret v Sant Peterburgu - tiež vlastník a iniciátor projektu.	Knižnaja Kapella vlastní kolekciu s približne 5000 knihami, publikovanými petrohradským vydavateľstvom Alfaret, ktoré je zároveň vlastníkom a iniciátorom projektu.	0.789	0.842	0.842	0.842	0.789	0.21	0.05	0	0	0.947	1	1	1	0.789	0.21	0	0	0	0.158	0.158	0.158	0.158	0	0	-0.05	0	0	E
132	8	d132s8	The individual books have an average price of between 30,000 and 50,000 rubles, the equivalent of L400 to L700.	Jednotlivé knihy majú priemernú cenu vo výške medzi 30.000 a 50.000 rubľov, čo je ekvivalent 400 L do 700 L.	Jednotlivé knihy majú priemernú cenu vo výške medzi 30.000 a 50.000 rubľov, čo je zhruba 400 L až 700 L.	Každá jedna kniha má priemerne hodnotu 30 000 až 50 000 rubľov, čo je asi 400 až 700 libier.	0.789	0.789	0.789	0.789	0.737	0.25	0.1	0.05	0	0.684	0.737	0.737	0.737	0.684	0.3	0.15	0.05	0	-0.105	-0.052	-0.052	-0.052	-0.053	0.05	0.05	0	0	E
132	9	d132s9	All the books date from between the 16th and 19th centuries and are displayed in thematic rooms with names including The Book of Wars and The Book of Travels.	Všetky knihy sa datujú od medzi 16. a 19. storočia a sú zobrazené v tematických izieb s názvami vrátane The Book of Wars a Kniha jázd.	Všetky knihy sa datujú od 16. a 19. storočia a sú zobrazené v tematických miestnostiach s názvami vrátane Vojnových kníh a Cestopisných kníh.	Všetky knihy pochádzajú z obdobia od 16. do 19. storočia a sú vystavené v tematických miestnostiach s názvami napríklad Vojnové knihy alebo Cestopisy.	0.565	0.652	0.652	0.652	0.565	0.53	0.24	0.08	0.04	0.391	0.478	0.478	0.478	0.478	0.65	0.4	0.23	0.15	-0.174	-0.174	-0.174	-0.174	-0.087	0.12	0.16	0.15	0.11	E
132	10	d132s10	Its motto is a phrase from Jorge Luis Borges:	Jeho mottom je veta od Jorge Luis Borges:	Jej mottom je veta od Jorgea Luisa Borgesa:	Mottom knižnice je citát Jorga Luisa Borgesa:	0.857	1	1	1	0.857	0.25	0	0	0	0.571	0.714	0.714	0.714	0.571	0.5	0.14	0	0	-0.286	-0.286	-0.286	-0.286	-0.286	0.25	0.14	0	0	E
132	11	d132s11	“I have always imagined paradise as a library.”	"Vždy som si predstavoval raj ako knižnica."	"Vždy som si predstavoval raj ako knižnicu."	"Raj som si vždy predstavoval ako knižnicu."	0.143	0.571	0.571	0.571	0.429	0.85	0.16	0	0	0	0.429	0.429	0.429	0.286	1	0.33	0	0	-0.143	-0.142	-0.142	-0.142	-0.143	0.15	0.17	0	0	E
132	12	d132s12	“One hundred pounds per visit is certainly not a low price, but it is less expensive than tickets to the opera or ballet,” said Irina Khoteshova, the project director.	"Sto libier za návštevu rozhodne nie je nízka cena, ale je to lacnejšie ako lístky na operu alebo balet," hovorí Irina Khoteshova, riaditeľ projektu.	"Sto libier za návštevu rozhodne nie je nízka cena, ale je to lacnejšie ako lístky na operu alebo balet," hovorí Irina Chotešovová, riaditeľ projektu.	Riaditeľka projektu, Irina Khoteshova, povedala: "Sto libier nie je malá čiastka, no stále menšia ako za lístok do opery či divadla.	0.714	1	1	1	0.905	0.41	0.13	0	0	0.762	1	1	1	0.905	0.37	0.08	0	0	0.048	0	0	0	0	-0.04	-0.05	0	0	E
132	13	d132s13	“People aren’t really surprised by the price itself.	"Ľudia sú naozaj prekvapený samotnou cenou.	"Ľudia nie sú prekvapený samotnou cenou.	Ľudí však táto suma neprekvapuje.	1	1	1	1	1	0	0	0	0	1	1	1	1	1	0	0	0	0	0	0	0	0	0	0	0	0	0	E
132	14	d132s14	They are surprised that it’s the price for a visit to a library.”	Oni sú prekvapení, že je to cena pre návštevu knižnice. "	Skôr ich prekvapuje, že je to cena za návštevu knižnice."	Skôr sú zaskočení tým, že je to za návštevu knižnice."	0.4	0.5	0.5	0.5	0.4	0.6	0.33	0.12	0	0.3	0.4	0.4	0.4	0.4	0.7	0.44	0.25	0	-0.1	-0.1	-0.1	-0.1	0	0.1	0.11	0.13	0	E
132	15	d132s15	While it may not be the only library in the world to charge for entry – the London Library charges between L255 and L510 for annual membership (and up to L22,000 to a lifetime subscription), while the Portico library in Manchester lifetime subscription will set one back L4,667 (discounted to L3,271 for those over 60) – Book Capella is comparatively exorbitant.	I keď to nemusí byť jedinou knižnicu na svete, aby poplatok za vstup - poplatkov London Knižnica medzi L 255 a 510 L na ročné členstvo (a až L 22,000 k odberu celoživotné), zatiaľ čo knižnica Portico v Manchestri doživotné predplatné nastaviť jeden späť 4.667 L (so zľavou až 3271 L pre tie staršie 60 rokov) - Book Capella je pomerne premrštené.	I keď to nemusí byť jediná knižnica na svete, ktorá vyberá poplatok za vstup - ročné členstvo do Londýnskej knižnice stojí medzi L 255 a 510 L (a až L 22,000 za doživotné predplatné ), zatiaľ čo v knižnici Portico v Manchestri stojí doživotné predplatné 4.667 L (so zľavou až 3271 L pre tie ľudí starších ako 60 rokov). Ceny v Book Capella sú pomerne prehnané.	Nie je to však jediná knižnica na svete, ktorá si účtuje vstupný poplatok. Ročné členstvo v Londýnskej knižnici stojí od 225 libier do 510 libier (a vyše 22 000 libier za doživotné predplatné). Knižnica Portico v Manchestri si za celoživotné predplatné účtuje 4 668 libier (zľavnenú sumu 3 241 libier platia návštevníci nad 60 rokov). Ceny v Knižnaja Kapelle sú nemenej prehnané..	0.603	0.873	0.873	0.873	0.81	0.46	0.11	0.03	0.01	0.571	0.714	0.714	0.714	0.619	0.61	0.2	0.1	0.04	-0.032	-0.159	-0.159	-0.159	-0.191	0.15	0.09	0.07	0.03	E
132	16	d132s16	Its “Book Apostle” yearly card costs 230,000 rubles (L3,209), while the “Preacher’s Book Apostle”, a lifetime subscription, can cost up to 5m rubles (L69,000).	Jeho "Kniha apoštol" ročná karta stojí 230.000 rubľov (L 3209), zatiaľ čo "kazateľov Book apoštol", predplatné životnosť, môže stáť až do 5 rubľov (L 69,000).	Jeho ročná karta "Kniha apoštolov "stojí 230.000 rubľov (L 3209), zatiaľ čo doživotné predplatné karta do "Kazateľových kníh apoštolových", môže stáť až 5 000 000 rubľov (L 69,000).	Ročná členská karta, Kniha apoštolov, stojí 230 tisíc rubľov (3 209 libier) a doživotné členstvo, Kazateľská kniha apoštolov, môže stáť až 5 miliónov rubľov (69 000 libier).	0.593	0.778	0.778	0.778	0.741	0.37	0.07	0.04	0	0.519	0.741	0.741	0.741	0.63	0.51	0.17	0.11	0.03	-0.074	-0.037	-0.037	-0.037	-0.111	0.14	0.1	0.07	0.03	E
132	17	d132s17	Khoteshova said that the library, which opened in December, is mainly used by book collectors, historians and scientists – as well as businesspeople, who want to have meetings in a quiet space that also serves as an exotic change from their usual haunts.	Khoteshova povedal, že knižnica, ktorá bola otvorená v decembri, je používaný hlavne knihy kolektory, historikov a vedcov - rovnako ako podnikatelia, ktorí chcú mať stretnutie v pokojnom priestore, ktorý zároveň slúži ako exotická zmena od svojej obvyklej straší.	Chotešovová povedal, že knižnicu, ktorá bola otvorená v decembri, navštevujú najmä hlavne knižný zberatelia, historici a vedci - rovnako ako podnikatelia, ktorí chcú mať stretnutie v pokojnom priestore, ktoré zároveň slúži ako príjemná zmena od stereotypu.	Khoteshova povedala, že knižnicu otvorenú v decembri navštevujú najmä zberatelia kníh, historici, vedci ako aj podnikatelia, ktorí sa chcú stretnúť na inom tichom nezvyčajnom mieste.	1	1	1	1	0.8	0.26	0.05	0	0	0.92	1	1	1	0.64	0.41	0.14	0.05	0.03	-0.08	0	0	0	-0.16	0.15	0.09	0.05	0.03	E
132	18	d132s18	When asked how academics, who earn less than the average per capita income in Russia, would afford such a pricey ticket, she said:	Na otázku, ako akademikmi, ktorí zarábajú menej ako je priemer za príjem na hlavu v Rusku, by si dovoliť takú drahú letenku, povedala:	Na otázku, ako akademici, ktorí zarábajú menej ako je priemer za príjem na obyvateľa v Rusku, si môžu dovoliť taký drahý vstup, povedala:	Na otázku ako si akademici, ktorí zarábajú menej ako je v Rusku priemerný príjem na osobu môžu dovoliť tak drahý vstup odpovedala:	0.409	0.636	0.636	0.636	0.545	0.6	0.36	0.19	0.1	0.227	0.455	0.455	0.455	0.364	0.78	0.5	0.23	0.15	-0.182	-0.181	-0.181	-0.181	-0.181	0.18	0.14	0.04	0.05	E
132	19	d132s19	“Some of the young professionals who recently graduated from universities and are just beginning their serious research would not be able to afford the membership, we understand that.	"Niektorí z mladých odborníkov, ktorí nedávno absolvovali vysokých škôl a len začínajú ich seriózne výskumy nebude môcť dovoliť členstvo, chápeme, že.	"Niektorí mladý odborníci, ktorí nedávno absolvovali vysokú školu a len začínajú ich výskumy si nebudú môcť dovoliť členstvo, to je nám jasné.	"Rozumieme, že mladí odborníci, ktorí len nedávno ukončili štúdium na univerzitách a začínajú so svojím výskumom si vstup dovoliť nemôžu.	0.7	0.9	0.9	0.9	0.8	0.33	0	0	0	0.75	0.95	0.95	0.95	0.75	0.34	0.04	0	0	0.05	0.05	0.05	0.05	-0.05	0.01	0.04	0	0	E
132	20	d132s20	But academics, professors, professionals who lead and create a historical transmission often become buyers of our books.”	Ale akademici, profesori, odborníci, ktorí vedú a vytvárajú historickú prenos sa často stávajú kupci našich kníh. "	Ale akademici, profesori, odborníci, ktorí vedú a vytvárajú historický prenos sa často stávajú kupcami našich kníh. "	Avšak, akademici, profesori a odborníci, ktorí vedú a vytvárajú historický vývin sa stávajú kupcami našich kníh.	0.25	0.375	0.375	0.375	0.313	0.68	0.4	0.21	0.15	0.125	0.25	0.25	0.25	0.188	0.81	0.6	0.42	0.3	-0.125	-0.125	-0.125	-0.125	-0.125	0.13	0.2	0.21	0.15	E
132	21	d132s21	Some of the library’s most expensive items include facsimiles of manuscript atlases of the main provinces of the Russian empire in the 1760s, as well as a complete edition of the pre-revolutionary Russian Niva magazines, which are much sought-after collectibles and hunted by private collectors around the world.	Niektoré z knižnice najdrahších položiek, patrí faksimile rukopisu atlasov hlavných provincií Ruskej ríše v roku 1760, rovnako ako kompletné vydanie predrevolučnej ruskej Niva časopisy, ktoré sú veľa vyhľadávané zberateľské predmety a lovil zo súkromných zberatelia po celom svete.	Do jedna z najdrahších položiek, patrí presný rukopis atlasov hlavných provincií Ruskej ríše v roku 1760, rovnako ako kompletné vydanie predrevolučných ruských časopisov NIva, ktoré sú vyhľadávané zberateľské predmety a zháňané súkromnými zberateľmi po celom svete.	Jedným z najdrahších diel je presná kópia rukopisov, hlavných provincií ruského impéria, z roku 1760. Ako aj kompletná zbierka predrevolučných ruských časopisov Niva, ktoré patria medzi veľmi vyhľadávané kúsky súkromnými zberateľmi po celom svete.	0.706	0.824	0.824	0.824	0.706	0.34	0.1	0.02	0	0.559	0.647	0.647	0.647	0.559	0.47	0.27	0.11	0.05	-0.147	-0.177	-0.177	-0.177	-0.147	0.13	0.17	0.09	0.05	E
132	22	d132s22	Founded in 2006, Alfaret mainly publishes traditional Russian and western history and art history books in luxury editions of around 100 copies, as well as print-on-demand titles; the kind of books that those who are more interested in power than culture would seek, for the purpose of putting on show.	Spoločnosť bola založená v roku 2006, Alfaret publikuje predovšetkým tradičnej ruskej a západnej histórii a dejiny umenia knihy v luxusných vydaniach okolo 100 kópií, rovnako ako tituly print-on-demand; druh kníh, že tí, ktorí sa viac zaujímajú o spotrebu energie oproti kultúre by sa snažiť, s cieľom uvedenia na show.	Nakladateľstvo Alfaret bolo založená v roku 2006, publikuje predovšetkým tradičnú ruskú a západnú históriu v v luxusných vydaniach okolo 100 kópií, rovnako ako tituly na vyžiadanie. Knihy, ktoré sú zaujímavé pre tých, ktorí vyhľadávajú moc ako samotné umenie.	Alfaret založené v roku 2006 publikuje najmä luxusné 100 kusové vydania tradičných ruských kníh, západných historických kníh, kníh dejín umenia ako aj knihy tlačené na objednávku. Také knihy, ktoré zaujmú ľudí túžiacich po moci, viac ako po kultúre.	0.842	1	1	1	0.868	0.28	0.04	0.02	0	0.711	0.842	0.842	0.842	0.816	0.33	0.07	0.02	0	-0.131	-0.158	-0.158	-0.158	-0.052	0.05	0.03	0	0	E
132	23	d132s23	“Book Capella is not a library in the traditional sense, and it is not a museum, although elements of the museum are presented.	"Kniha Capella nie je knižnica v tradičnom slova zmysle, a to nie je múzeum, hoci prvky múzea sú prezentované.	"Kniha Capella nie je knižnica v tradičnom slova zmysle, a nie je to múzeum, hoci tu sa tu prvky múzea nachádzajú.	Khoteshova povedala: "Knižnaja Kapella nie je tradičnou knižnicou, ani múzeom, aj keď znaky múzea nesie.	1	1	1	1	0.867	0.26	0.11	0	0	1	1	1	1	0.8	0.21	0.09	0	0	0	0	0	0	-0.067	-0.05	-0.02	0	0	E
132	24	d132s24	It’s also not the bookstore, although you can buy our books here.	Je to tiež nie je kníhkupectvo, aj keď si môžete kúpiť tu naše knihy.	Nie je to kníhkupectvo, aj keď si môžete knihy zakúpiť.	Taktiež to nie je kníhkupectvo, aj keď si tu knihy môžete zakúpiť.	0.333	0.583	0.583	0.583	0.417	0.78	0.38	0.33	0.27	0.167	0.417	0.417	0.417	0.417	0.83	0.37	0.2	0.11	-0.166	-0.166	-0.166	-0.166	0	0.05	-0.01	-0.13	-0.16	E
132	25	d132s25	[It] is a new way for people to communicate with rare books,” Khoteshova said.	[To] je nový spôsob, ako ľudia komunikovať s vzácnymi knihami, "povedal Khoteshova.	Je to spôsob ako sa ľudia dostanú k ojedinelým knihám " povedala Chotoševová.	Je to spôsob, akým sa ľudia dostanú k ojedinelým knihám."	0.8	1	1	1	0.9	0.33	0	0	0	0.5	0.5	0.5	0.5	0.3	0.61	0.5	0.36	0.3	-0.3	-0.5	-0.5	-0.5	-0.6	0.28	0.5	0.36	0.3	E
133	1	d133s1	Protesters in Barcelona urge Spain to take in more refugees	Demonštranti v Barcelone naliehala na Španielsko, aby sa vo viac utečencov	Demonštranti v Barcelone naliehali na Španielsko, aby prijalo viac utečencov.	Demonštranti v Barcelone tlačia na Španielsko, aby prijali viac utečencov	0.3	0.3	0.3	0.3	0.3	0.72	0.5	0.22	0	0.2	0.2	0.2	0.2	0.2	0.8	0.55	0.25	0	-0.1	-0.1	-0.1	-0.1	-0.1	0.08	0.05	0.03	0	E
133	2	d133s2	Mayor tells residents to ‘fill the streets’ to challenge the government over ‘shameful’ failure to accept country’s quota of migrants.	Starosta hovorí obyvateľov do "zaplavia ulice" napádať vládu nad "zahanbujúceho" neprijatie kvótu krajiny migrantov.	Starostka hovorí obyvateľom, aby "zaplavili ulice" a vyzvali vládu kvôli "zahanbujúcemu" zlyhaniu prijať svoju kvótu migrantov.	Primátorka hovorí obyvateľom, aby "zaplnili" ulice a vzniesli tým námietky voči "hanebnej" neschopnosti vlády akceptovať svoju kvótu migrantov.	0.778	0.833	0.833	0.833	0.778	0.22	0	0	0	0.556	0.556	0.556	0.556	0.5	0.44	0.29	0.12	0	-0.222	-0.277	-0.277	-0.277	-0.278	0.22	0.29	0.12	0	E
133	3	d133s3	Tens of thousands of people marched through Barcelona on Saturday urging the Spanish government to immediately meet its pledge to take in thousands of refugees.	Desiatky tisíc ľudí pochodovali cez Barcelona v sobotu naliehal na španielsku vládu, aby okamžite splniť svoj záväzok prijať v tisíce utečencov.	Desiatky tisíc ľudí pochodovali cez Barcelonu v sobotu a naliehali na španielsku vládu, aby okamžite splnila svoj záväzok prijať tisíce utečencov.	V sobotu pochodovali cez Barcelonu desiatky tisíc ľudí.Naliehali na španielsku vládu, aby okamžite splnila svoj záväzok a prijala tisícky utečencov.	0.35	0.55	0.55	0.55	0.5	0.71	0.4	0.15	0.11	0.2	0.5	0.5	0.5	0.45	0.8	0.55	0.36	0.27	-0.15	-0.05	-0.05	-0.05	-0.05	0.09	0.15	0.21	0.16	E
133	4	d133s4	Ada Colau, the mayor of Spain’s second city, had called on Barcelona residents to “fill the streets” and march under the slogan volem acollir (“We want to welcome them” in Catalan).	Ada cola, starosta španielskeho druhé mesto, vyzval obyvateľov Barcelona "zaplavia ulice" a pochod pod heslom volom acollir ( "Chceme privítať" v katalánčine).	Ada Colau, starostka druhého španielskeho mesta vyzvala obyvateľov Barcelony, aby "zaplavili ulice" a pochodovali pod heslom volem acollir ( "Chceme ich privítať" v Katalánsku).	Primátor druhého najväčšieho mesta Španielska, Ada Colau, vyzval obyvateľov Barcelony, aby „zaplnili ulice" a pochodovali pod sloganom „volem acollir“ („chceme ich privítať" po katalánsky).	0.708	0.75	0.75	0.75	0.708	0.29	0.08	0	0	0.458	0.667	0.667	0.667	0.583	0.54	0.3	0.13	0.04	-0.25	-0.083	-0.083	-0.083	-0.125	0.25	0.22	0.13	0.04	E
133	5	d133s5	Local police said approximately 160,000 people had heeded her call.	Miestna polícia asi 160.000 ľudí sa dbal jej volanie.	Miestna polícia uviedla, že pochodu sa zúčastnilo asi 160 000 ľudí.	Miestna polícia uviedla, že ju vypočulo približne 160 000 ľudí.	0.7	0.8	0.8	0.8	0.8	0.3	0.11	0	0	0.4	0.4	0.4	0.4	0.4	0.63	0.5	0.33	0.12	-0.3	-0.4	-0.4	-0.4	-0.4	0.33	0.39	0.33	0.12	E
133	6	d133s6	Many of those flooding the major Via Laietana thoroughfare carried signs reading “Enough excuses, welcome them now”.	Mnohí z tých, zatopenie hlavné Via Laietana tepnou vykonáva znamenie čítanie "Dosť výhovorky, vitajte je teraz".	Mnohí z protestujúcich, ktorí pochodovali cez hlavnú ulicu Laietana niesli so sebou plagáty "Dosť bolo výhovoriek, uvítajte ich teraz".	Ľudia zaplnili hlavnú ulicu Via Laietana a mnohí niesli plagáty s nápisom: „dosť bolo výhovoriek, privítajte ich hneď“.	0.833	0.944	0.944	0.944	0.889	0.16	0.05	0	0	0.611	0.889	0.889	0.889	0.667	0.45	0.1	0	0	-0.222	-0.055	-0.055	-0.055	-0.222	0.29	0.05	0	0	E
133	7	d133s7	The protest comes after Spain pledged to take in about 16,000 asylum seekers from other EU countries under a quota system agreed in 2015, as the continent struggled with its biggest migration crisis since the second world war.	Protest prichádza po tom, čo Španielsko zaviazala prijať asi 16.000 žiadateľov o azyl z iných krajín EÚ v rámci systému kvót dohodnutej v roku 2015, ako kontinent zápasil s jeho najväčší migračná kríza od druhej svetovej vojny.	Ľudia začali protestovať potom, čo sa Španielsko zaviazalo prijať asi 16 000 žiadateľov o azyl z iných krajín EÚ v rámci systému kvót dohodnutej v roku 2015, v čase ked kontinent zápasil s najväčšou migračnou krízou od druhej svetovej vojny.	Protest sa začal potom, čo sa Španielsko zaviazalo, že v rámci systému kvót príjme okolo 16 000 žiadateľov o azyl z krajín EÚ. Na tomto sa dohodlo v roku 2015, v čase kedy kontinent bojoval s najväčšou migračnou krízou od konca druhej svetovej vojny.	0.477	0.659	0.659	0.659	0.614	0.5	0.25	0.14	0.04	0.25	0.432	0.432	0.432	0.364	0.7	0.53	0.38	0.24	-0.227	-0.227	-0.227	-0.227	-0.25	0.2	0.28	0.24	0.2	E
133	8	d133s8	https://www.theguardian.com/world/2015/sep/22/eu-governments-divisive-quotas-deal-share-120000-refugees	https://www.theguardian.com/world/2015/sep/22/eu-governments-divisive-quotas-deal-share-120000-refugees	https://www.theguardian.com/world/2015/sep/22/eu-governments-divisive-quotas-deal-share-120000-refugees	https://www.theguardian.com/world/2015/sep/22/eu-governments-divisive-quotas-deal-share-120000-refugees	0	0	0	0	0	1	0	0	0	0	0	0	0	0	1	0	0	0	0	0	0	0	0	0	0	0	0	E
133	9	d133s9	Like other EU members, Spain has fallen far short of this target, with only 1,100 resettled in the country so far.	Rovnako ako ostatní členovia EÚ, Španielsko ani zďaleka nedosahoval tohto cieľa, len s 1100 presídlil v krajine tak ďaleko.	Rovnako ako ostatní členovia EÚ, Španielsko ani zďaleka nedosiahlo svoj cieľ a presídlil len 1100 žiadateľov.	Ako aj iné členské štáty Európskej únie, Španielsko tento cieľ nesplnilo a doteraz prijalo iba 1100 utečencov.	0.941	1	1	1	0.882	0.15	0	0	0	0.706	0.824	0.824	0.824	0.765	0.29	0	0	0	-0.235	-0.176	-0.176	-0.176	-0.117	0.14	0	0	0	E
133	10	d133s10	https://www.theguardian.com/world/spain	https://www.theguardian.com/world/spain	https://www.theguardian.com/world/spain	https://www.theguardian.com/world/spain	0	0	0	0	0	1	0	0	0	0	0	0	0	0	1	0	0	0	0	0	0	0	0	0	0	0	0	E
133	11	d133s11	Jacint Comelles, a 62-year-old potter who joined the protest with friends and family, said not enough was being done to help people who have fled conflict hoping to start a new life in Europe.	Jacint Comelles, 62-ročný Potter, ktorý sa pripojil k protestu s priateľmi a rodinou, povedal nestačí bola vykonaná na pomoc ľuďom, ktorí utiekli v nádeji, že konflikt začať nový život v Európe.	Jacint Comelles, 62-ročný hrnčiar, ktorý sa pripojil k protestu s priateľmi a rodinou, povedal, že nebola poskytnutá dostatočná pomoc ľuďom, ktorí utiekli pred konfliktom v nádeji, že začnú nový život v Európe.	Jacint Comelles, 62-ročný hrnčiar, ktorý sa pridal k protestom s priateľmi a rodinou povedal, že nebola poskytnutá dostatočná pomoc ľuďom, ktorí utiekli pred konfliktom s nádejou, že začnú svoj nový život v Európe.	0.333	0.394	0.394	0.394	0.394	0.63	0.4	0.25	0.13	0.121	0.152	0.152	0.152	0.152	0.87	0.71	0.61	0.53	-0.212	-0.242	-0.242	-0.242	-0.242	0.24	0.31	0.36	0.4	E
133	12	d133s12	“We demand this minimum amount of dignity – that at least this number of refugees (16,000) can come,” he said.	"Žiadame, aby tieto minimálne množstvá dôstojnosť - že aspoň tento počet utečencov (16,000) môže prísť," povedal.	"Žiadame minimum dôstojnosti, aby aspoň tento počet utečencov (16,000) mohol prísť," povedal.	„Žiadame aspoň o trochu dôstojnosti, nech príde aspoň 16000 utečencov ", povedal.	0.917	1	1	1	0.833	0.25	0	0	0	0.583	0.917	0.917	0.917	0.75	0.33	0	0	0	-0.334	-0.083	-0.083	-0.083	-0.083	0.08	0	0	0	E
133	13	d133s13	“In Catalonia, everything is ready to welcome them.”	"V Katalánsku, všetko je pripravené, aby je vítaný."	"V Katalánsku, všetko je pripravené na to, aby ich uvítali."	„V Katalánsku sú pripravení ich privítať“.	1	1	1	1	0.833	0.12	0	0	0	1	1	1	1	0.667	0.2	0	0	0	0	0	0	0	-0.166	0.08	0	0	0	E
133	14	d133s14	https://www.theguardian.com/world/catalonia	https://www.theguardian.com/world/catalonia	https://www.theguardian.com/world/catalonia	https://www.theguardian.com/world/catalonia	0	0	0	0	0	1	0	0	0	0	0	0	0	0	1	0	0	0	0	0	0	0	0	0	0	0	0	E
133	15	d133s15	The protest, organised by a group calling itself Casa Nostra Casa Vostra (Our home is your home), finished at the Mediterranean coast – a symbolic location given the more than 5,000 migrants who lost their lives trying to cross the sea last year.	Protest, organizovaný skupinou volať seba Casa Nostra Casa Vostrá (Náš domov je váš domov), skončil na pobreží Stredozemného mora - symbolické umiestnenie získaného na viac ako 5000 migrantov, ktorí prišli o život pri pokuse o prekonanie mora vlani.	Protest, zorganizovaný skupinou, ktorá samu seba nazýva Casa Nostra Casa Vostrá (Náš domov je váš domov), skončil na pobreží Stredozemného mora - symbolické miesto pre viac ako 5000 migrantov, ktorí minulý rok prišli o život pri pokuse dostať sa cez more.	Protest zorganizovaný skupinou, ktorá samu seba nazýva Casa Nostra Casa Vostra (Náš domov je Váš domov) skončil na pobreží Stredozemného mora na symbolickom mieste. Minulý rok tu prišlo o život viac ako 5 000 migrantov, ktorí sa snažili dostať do Európy cez more.	0.465	0.581	0.581	0.581	0.535	0.58	0.33	0.22	0.17	0.233	0.465	0.465	0.465	0.349	0.74	0.54	0.39	0.35	-0.232	-0.116	-0.116	-0.116	-0.186	0.16	0.21	0.17	0.18	E
133	16	d133s16	Senior Barcelona lawmaker Merce Conesa said on Wednesday that it was “shameful” that Spain had not taken in more refugees, and urged the European commission to begin “severely sanctioning” countries that did not meet their pledges on the issue.	Senior Barcelona zákonodarca Merce Conesa v stredu uviedol, že to bolo "hanebné", že Španielsko neprijalo vo viac utečencov, a vyzval Európsku komisiu na začatie "prísne sankčné" krajiny, ktoré nesplnili svoje záväzky na danú problematiku.	Najvýšší barcelonský zákonodarca Merce Conesa v stredu uviedol, že bolo "hanebné", že Španielsko neprijalo viac utečencov, a vyzval Európsku komisiu, aby začala udeľovať "prísne sankcie" krajinám, ktoré nesplnili svoje záväzky týkajúce sa danej problematiky.	Najvyšší barcelonský zákonnodarca Merce Conesa v stredu uviedol, že Španielsko sa zachovalo „hanebne“, keď neprijalo viac utečencov. Vyzval Európsku Komisiu k tomu, aby začala „s udeľovaním prísnych sankcií“ krajinám, ktoré svoje záväzky nesplnili.	0.515	0.697	0.697	0.697	0.636	0.52	0.3	0.15	0.09	0.364	0.576	0.576	0.576	0.485	0.67	0.39	0.18	0.09	-0.151	-0.121	-0.121	-0.121	-0.151	0.15	0.09	0.03	0	E
134	1	d134s1	Zweisprachige Kinder klären Irrtümer eher auf	Bilingválne deti objasniť chyby trochu	Bilingválne deti objasnia chyby skôr	Bilingválne deti majú tendenciu odhaliť chyby skôr	0.571	0.571	0.571	0.571	0.571	0.42	0.17	0	0	0.429	0.429	0.429	0.429	0.429	0.57	0.35	0	0	-0.142	-0.142	-0.142	-0.142	-0.142	0.15	0.18	0	0	C
134	2	d134s2	Wer bilingual aufwächst, lernt früh, mit Missverständnissen umzugehen - und diese zu entwirren.	Ľudia, ktorí vyrastajú bilingválne vzdelávanie v ranom veku sa vysporiadať s nedorozumenia - a rozpletať toto.	Ľudia, ktorí vyrastajú bilingválne sa naučia vysporiadať skôr s nedorozumenia - a rozpletú ich.	Tí, ktorí vyrastajú v dvojjazyčnom prostredí sa skôr vysporiadajú s nedorozumeniami a objasnia ich.	0.5	0.813	0.813	0.813	0.688	0.43	0.06	0	0	0.438	0.688	0.688	0.688	0.625	0.5	0.06	0	0	-0.062	-0.125	-0.125	-0.125	-0.063	0.07	0	0	0	C
134	3	d134s3	Sprachliches Kuddelmuddel schult auch soziale Fähigkeiten.	Jazyková zmätok vlaky sociálne zručnosti.	Jazyková zmätok precvičuje sociálne zručnosti.	Jazykové trmy-vrmy cvičia aj sociálne schopnosti.	0.833	0.833	0.833	0.833	0.667	0.16	0	0	0	0.833	0.833	0.833	0.833	0.667	0.16	0	0	0	0	0	0	0	0	0	0	0	0	C
134	4	d134s4	Wie bitte?	Skrývať?	Ako prosím?	Ako prosím?	1	1	1	1	0.5	0	0	0	0	0	0	0	0	0	1	1	0	0	-1	-1	-1	-1	-0.5	1	1	0	0	C
134	5	d134s5	What?	Čo?	Čo?	Was?	1	1	1	1	0	0	0	0	0	1	1	1	1	0	0	0	0	0	0	0	0	0	0	0	0	0	0	C
134	6	d134s6	Kinder, die mit zwei Sprachen aufwachsen, lernen diese zwar leichter als Erwachsene, doch auch sie stoßen im Alltag häufig auf Hindernisse.	Deti, ktoré vyrastajú s dvoma jazykmi, táto štúdia síce ľahšie ako u dospelých, ale aj oni sa stretnú v bežnom živote často prekážok.	Deti, ktoré vyrastajú s dvoma jazykmi, sa ich učia ľahšie ako dospelí, ale aj oni sa stretnú v bežnom živote často s prekážkami.	Deti, ktoré vyrastajú v dvojjazyčnom prostredí, sa učia jednoduchšie ako dospelí, ale denne tiež narážajú často na problémy.	0.833	1	1	1	0.778	0.34	0.09	0.04	0	0.722	0.778	0.778	0.778	0.611	0.47	0.18	0.09	0	-0.111	-0.222	-0.222	-0.222	-0.167	0.13	0.09	0.05	0	C
134	7	d134s7	So fanden Forscher heraus, dass bilinguale Kinder häufiger unpassende Wörter benutzen, falsche Satzkonstruktionen verwenden oder während des Gesprächs in eine andere Sprache wechseln.	Napríklad, vedci zistili, že bilingválne deti často používajú nevhodné slová, použite nesprávne vetné konštrukcie alebo zmeny počas konverzácie v inom jazyku.	Napríklad, vedci zistili, že bilingválne deti často používajú nevhodné slová, nesprávne vetné konštrukcie alebo zmenia počas konverzácie jazyk.	Napríklad vedci zistili, že bilingválne deti používajú častejšie nehodiace sa slová, chybné vetné konštrukcie alebo počas rozhovoru začnú hovoriť iným jazykom.	0.429	0.571	0.571	0.571	0.571	0.57	0.35	0.26	0.16	0.429	0.524	0.524	0.524	0.524	0.57	0.35	0.26	0.17	0	-0.047	-0.047	-0.047	-0.047	0	0	0	0.01	C
134	8	d134s8	Der Grund:	dôvod:	Dôvod:	Dôvod:	0	0	0	0	0	1	0	0	0	0	0	0	0	0	1	0	0	0	0	0	0	0	0	0	0	0	0	C
134	9	d134s9	Pro Sprache verfügen sie über weniger Vokabeln.	Pre jazyk majú menej slov.	Pre jazyk majú menej slov.	Majú menšiu slovnú zásobu pre jednotlivé jazyky.	0.714	1	1	1	0.857	0.28	0	0	0	0.714	1	1	1	0.857	0.28	0	0	0	0	0	0	0	0	0	0	0	0	C
134	10	d134s10	Das muss kein Nachteil sein.	To nie je nevýhodné.	To nie je nevýhodné.	Nemusí to byť nevýhodou.	0.75	1	1	1	0.75	0.25	0	0	0	0.75	1	1	1	0.75	0.25	0	0	0	0	0	0	0	0	0	0	0	0	C
134	11	d134s11	"Durch diese alltäglichen Erfahrungen sind zweisprachige Kinder geübter darin, sprachliche Missverständnisse zu entdecken und dann auch zu korrigieren", erklärt die Entwicklungspsychologin Stephanie Wermelinger.	"Prostredníctvom týchto každodenných skúseností bilingválne deti vykonávali v objavovaní jazykovým nedorozumeniam a tiež k náprave," vysvetľuje vývojový psychológ Stephanie Wermelinger.	"Prostredníctvom týchto každodenných skúseností bilingválne deti odkrývali jazykové nedorozumenia a opravovali ich," vysvetľuje vývojová psychologička Stephanie Wermelinger.	„Dvojjazyčné deti sa pomocou týchto každodenných skúseností učia odhaliť jazykové nedorozumenia a opraviť ich“, vysvetľuje vývinová psychologička Stephanie Wermelinger.	0.632	0.842	0.842	0.842	0.684	0.4	0.15	0.05	0	0.421	0.526	0.526	0.526	0.474	0.57	0.33	0.17	0	-0.211	-0.316	-0.316	-0.316	-0.21	0.17	0.18	0.12	0	C
134	12	d134s12	Herausgefunden haben die Zürcher Forscher das mithilfe des grauen Plüschelefanten Otto:	To bolo preukázané, Zürichu výskumníkom použitie šedá plyšový slon Otto:	To bolo dokázané výskumníkmi z Zürichu použitím šedého plyšového slona Otta:	Zürišskí vedci na to prišli pomocou sivého plyšového slona, Otta:	0.9	1	1	1	0.9	0.1	0	0	0	0.8	0.9	0.9	0.9	0.8	0.27	0	0	0	-0.1	-0.1	-0.1	-0.1	-0.1	0.17	0	0	0	C
134	13	d134s13	Fürihre Studie spielten Wermelinger und ihr Team mit insgesamt 111 Kindern, die zwischen zwei und drei Jahre alt waren und einsprachig, mit zwei Dialekten (Schweizerdeutsch und Hochdeutsch) oder zweisprachig (Schweizerdeutsch und eine andere Sprache) aufwuchsen.	Štúdia Fürihre hral Wermelinger a jej tím s celkovým počtom 111 detí, ktorí boli vo veku dva až tri roky a jedným jazykom, s dvoma dialekty (švajčiarskej nemčiny a vysoká nemčina), alebo bilingválnych (švajčiarsky nemeckých a iný jazyk) vyrastal.	Počas štúdie sa hrala Wermelinger a jej tím s celkovým počtom 111 detí, ktoré boli vo veku dva až tri roky a vystali s jedným jazykom, s dvoma dialekty (švajčiarska nemčina a vysoká nemčina), alebo bilingválne (švajčiarsky a iný jazyk).	Wermelinger a jej tím sa počas ich výskumu hrali s celkovo 111 deťmi. Tieto deti boli vo veku od dvoch do troch rokov a vyrastali jednojazyčne alebo s dvoma dialektmi (švajčiarska a spisovná nemčina) alebo dvojjazyčne (švajčiarska nemčina a iný jazyk).	0.512	0.707	0.707	0.707	0.659	0.43	0.22	0.1	0.02	0.415	0.707	0.707	0.707	0.634	0.56	0.27	0.12	0.02	-0.097	0	0	0	-0.025	0.13	0.05	0.02	0	C
134	14	d134s14	Irrtümer aus dem Weg räumen	priznať chyby z cesty	Odstrániť chyby z cesty	Odpratať nedorozumenia z cesty.	0.75	0.75	0.75	0.75	0.5	0.25	0	0	0	0.75	0.75	0.75	0.75	0.5	0.25	0	0	0	0	0	0	0	0	0	0	0	0	C
134	15	d134s15	Weil Plüschelefant Otto zum Spaziergang aufbrechen wollte, zog die Versuchsleiterin ihm zunächst drei Schuhe an.	Vzhľadom k tomu, Plyšové Slon Otto sa chystal odísť na prechádzku, experimentátor spočiatku ho pritiahol k trom topánky.	Vzhľadom k tomu, že sa plyšový Slon Otto chystal odísť na prechádzku, obula mu experimentátorka spočiatku tri topánky.	Pretože sa chcel plyšový slon Otto vybrať na prechádzku, obula mu vedúca výskumu najprv tri topánky.	0.75	0.813	0.813	0.813	0.688	0.33	0.11	0	0	0.5	0.625	0.625	0.625	0.438	0.55	0.35	0.18	0.06	-0.25	-0.188	-0.188	-0.188	-0.25	0.22	0.24	0.18	0.06	C
134	16	d134s16	Den vierten behielt sie in der Hand, gab aber vor, ihn zu suchen.	Štvrtý držal ju v ruke, ale predstieral, že ho hľadať.	Štvrtú držala v ruke, ale predstierala, že ju hľadá.	Štvrtú si nechala v ruke a predstierala, že ju hľadá.	0.6	0.7	0.7	0.7	0.6	0.4	0.11	0	0	0.3	0.3	0.3	0.3	0.3	0.7	0.45	0.25	0.15	-0.3	-0.4	-0.4	-0.4	-0.3	0.3	0.34	0.25	0.15	C
134	17	d134s17	Wenn ein Kind helfen wollte und auf den Schuh zeigte, tat die Forscherin, als wolle das Kind auf ein Bild, das hinter ihr angebracht war, deuten.	Ak dieťa chcel pomôcť, ukázal na topánky, robil výskumného pracovníka, ako by dieťa na obraze, ktorý bol namontovaný za ňou, interpretovať.	Ak dieťa chcelo pomôcť, ukázalo na topánku, výskumný pracovník robil tak, akoby dieťa ukazovalo na obraz, ktorý bol namontovaný za ňou.	Akonáhle chcelo dieťa pomôcť a ukázalo na topánku, výskumníčka konala tak, ako keby dieťa ukazovalo na obraz, ktorý bol za ňou.	0.524	0.667	0.667	0.667	0.619	0.47	0.1	0	0	0.286	0.476	0.476	0.476	0.429	0.71	0.4	0.26	0.16	-0.238	-0.191	-0.191	-0.191	-0.19	0.24	0.3	0.26	0.16	C
134	18	d134s18	Sie kreierte ein Missverständnis.	Vytvorila nedorozumenie.	Vytvorila nedorozumenie.	Takto vytvorila nedorozumenie.	0.333	0.333	0.333	0.333	0.333	0.66	0.66	0	0	0.333	0.333	0.333	0.333	0.333	0.66	0.66	0	0	0	0	0	0	0	0	0	0	0	C
134	19	d134s19	Dabei zeigte sich, dass es vor allem die bilingualen Kinder waren, die häufiger den Irrtum aufklärten, um dem Elefanten seinen vierten Schuh zu verschaffen.	Ukázalo sa, že to bolo hlavne bilingválne deti častejšie objasnenie chybu dať slona svoj štvrtý topánku.	Ukázalo sa, že to boli hlavne bilingválne deti, ktoré častejšie objasnili chybu a dali slonovi jeho štvrtú topánku.	Tým sa ukázalo, že predovšetkým bilingválne deti tento omyl objasnili, aby slonovi zaobstarali jeho štvrtú topánku.	0.625	0.813	0.813	0.813	0.688	0.37	0.06	0	0	0.5	0.688	0.688	0.688	0.5	0.55	0.17	0.06	0	-0.125	-0.125	-0.125	-0.125	-0.188	0.18	0.11	0.06	0	C
134	20	d134s20	Wohl, weil sie es eher gewohnt waren, mit solchen Irrtümern umzugehen.	No, pretože oni boli viac zvyknutí na riešenie týchto chýb.	No, pretože oni boli viac zvyknutí na riešenie takýchto chýb.	Azda preto, lebo boli zvyknuté stretávať sa s takýmito nedorozumeniami.	0.909	0.909	0.909	0.909	0.818	0.09	0	0	0	0.909	0.909	0.909	0.909	0.818	0.09	0	0	0	0	0	0	0	0	0	0	0	0	C
134	21	d134s21	"Zweisprachigkeit bedeutet nicht nur, mehr Wörter zu lernen und das Gleiche auf unterschiedliche Art und Weise sagen zu können", sagt Moritz Daum, Professor für Entwicklungspsychologie an der Universität Zürich.	"Dvojjazyčnosť je nielen naučiť sa viac slov a vedieť povedať to isté rôznymi spôsobmi," hovorí Moritz Daum, profesor vývojovej psychológie na univerzite v Zürichu.	"Dvojjazyčnosť je nielen naučiť sa viac slov a vedieť povedať to isté rôznymi spôsobmi," hovorí Moritz Daum, profesor vývojovej psychológie na univerzite v Zürichu.	„Dvojjazyčnosť neznamená len naučiť sa viac slov a vedieť to isté povedať odlišným spôsobom“, hovorí Moritz Daum, profesor vývinovej psychológie na Univerzite v Zürichu.	0.25	0.333	0.333	0.333	0.292	0.75	0.56	0.4	0.28	0.25	0.333	0.333	0.333	0.292	0.75	0.56	0.4	0.28	0	0	0	0	0	0	0	0	0	C
134	22	d134s22	Die Studie zeige vielmehr, dass Zweisprachigkeit auch einen Einfluss darauf hat, wie Kinder komplexe Situationen verstehen und mit ihnen umgehen.	Štúdia ukazuje skôr to, že bilingvizmus má tiež vplyv na to, ako deťom pochopiť zložité situácie a vysporiadať sa s nimi.	Štúdia ukazuje skôr to, že bilingvizmus má tiež vplyv na to, ako deti pochopia zložité situácie a vysporiadajú sa s nimi.	Táto štúdia dokonca ukazuje, že dvojjazyčnosť ovplyvňuje aj detské chápanie komplexných situácii a zaobchádzanie s nimi.	0.938	1	1	1	0.813	0.28	0.05	0	0	0.938	1	1	1	0.813	0.28	0.05	0	0	0	0	0	0	0	0	0	0	0	C
134	23	d134s23	http://www.spiegel.de/gesundheit/psychologie/zweisprachige-kinder-klaeren-irrtuemer-eher-auf-a-1134674.html	http://www.spiegel.de/gesundheit/psychologie/zweisprachige-kinder-klaeren-irrtuemer-eher-auf-a-1134674.html	http://www.spiegel.de/gesundheit/psychologie/zweisprachige-kinder-klaeren-irrtuemer-eher-auf-a-1134674.html	http://www.spiegel.de/gesundheit/psychologie/zweisprachige-kinder-klaeren-irrtuemer-eher-auf-a-1134674.html	0	0	0	0	0	1	0	0	0	0	0	0	0	0	1	0	0	0	0	0	0	0	0	0	0	0	0	C
135	1	d135s1	Forschung absurd	výskum absurdné	Absurdný výskum	Absurdný výskum	0.5	1	1	1	0.5	0.5	0	0	0	0	0	0	0	0	1	1	0	0	-0.5	-1	-1	-1	-0.5	0.5	1	0	0	C
135	1	d135s1	Forschung absurd	výskum absurdné	Absurdný výskum	Absurdný výskum	0.5	1	1	1	0.5	0.5	0	0	0	0	0	0	0	0	1	1	0	0	-0.5	-1	-1	-1	-0.5	0.5	1	0	0	C
135	1	d135s1	Forschung absurd	výskum absurdné	Absurdný výskum	Absurdný výskum	0.5	1	1	1	0.5	0.5	0	0	0	0	0	0	0	0	1	1	0	0	-0.5	-1	-1	-1	-0.5	0.5	1	0	0	C
135	2	d135s2	Die perfekten Lippen	perfektné pery	Perfektné pery	Dokonalé pery	0.5	0.5	0.5	0.5	0	0.5	0	0	0	0.5	0.5	0.5	0.5	0	0.5	0	0	0	0	0	0	0	0	0	0	0	0	C
135	3	d135s3	Forscher wollen objektiv bestimmt haben, wie die perfekten Lippen aussehen.	Výskumníci chcú mať objektívne určené ako perfektný pery vyzerajú.	Výskumníci chcú mať objektívne určené ako perfektný pery vyzerajú.	Vedci mienia objektívne určiť, ako v skutočnosti vyzerajú dokonalé pery.	0.6	0.8	0.8	0.8	0.7	0.4	0	0	0	0.6	0.8	0.8	0.8	0.7	0.4	0	0	0	0	0	0	0	0	0	0	0	0	C
135	4	d135s4	Wir finden:	nájdeme:	My myslíme, že:	My si ale myslíme, že:	1	1	1	1	0.8	0	0	0	0	0.4	0.4	0.4	0.4	0.4	0.6	0.3	0	0	-0.6	-0.6	-0.6	-0.6	-0.4	0.6	0.3	0	0	C
135	5	d135s5	Das können Sie auch selbst entscheiden - ganz ohne wissenschaftliche Hilfe.	Môžete sa tiež rozhodnúť pre seba - bez akéhokoľvek vedeckého podporu.	Môžete sa tiež rozhodnúť podľa seba - bez akéhokoľvek vedeckého podpory.	o tom, ako práve takéto pery vyzerajú, môžete rozhodnúť aj vy, a to dokonca aj bez vedeckej pomoci.	0.833	0.944	0.944	0.944	0.889	0.16	0	0	0	0.833	0.944	0.944	0.944	0.889	0.16	0	0	0	0	0	0	0	0	0	0	0	0	C
135	6	d135s6	Probieren Sie es aus.	Skús to.	Skúste to.	Tak si to teda vyskúšajte.	0.8	0.8	0.8	0.8	0.6	0.2	0	0	0	0.8	0.8	0.8	0.8	0.6	0.2	0	0	0	0	0	0	0	0	0	0	0	0	C
135	7	d135s7	Es gibt wissenschaftliche Zeitschriften, die Woche für Woche Erkenntnisse seriöser Forscher publizieren.	Existujú vedecké časopisy, ktoré zverejňujú výsledky za týždeň seriózne bádateľ týždeň.	Existujú vedecké časopisy, ktoré zverejňujú týždeň čo týždeň výsledky serióznych bádateľov.	Existujú vedecké časopisy, ktoré každý týždeň publikujú poznatky serióznych výskumníkov.	0.6	0.7	0.7	0.7	0.6	0.54	0.3	0.22	0.12	0.5	0.5	0.5	0.5	0.5	0.63	0.3	0.22	0.12	-0.1	-0.2	-0.2	-0.2	-0.1	0.09	0	0	0	C
135	8	d135s8	Was in "Nature", "Science", "PNAS" oder "The Lancet" steht, hat zumindest das Potenzial, unser Verständnis der Welt voranzubringen und Menschen zu helfen.	Čo je v "Nature", "Science", "PNAS" alebo "The Lancet", aspoň potenciál k nášmu chápaniu sveta, musí postupovať a pomáhať ľuďom.	Čo je v "Nature", "Science", "PNAS" alebo "The Lancet", má aspoň potenciál k nášmu chápaniu sveta a pomáhať ľuďom.	A všetko, čo je vo vedeckých časopisoch „Nature", „Science“, „PNAS" alebo "The Lancet", má prinajmenšom potenciál pohnúť s našim chápaním sveta a pomáhať najmä ľuďom.	0.56	0.68	0.68	0.68	0.64	0.4	0.16	0.04	0	0.52	0.56	0.56	0.56	0.56	0.44	0.25	0.13	0.04	-0.04	-0.12	-0.12	-0.12	-0.08	0.04	0.09	0.09	0.04	C
135	9	d135s9	Und dann gibt es "JAMA Facial Plastic Surgery".	A potom sú tu "JAMA tvárovej plastickej chirurgie".	A potom sú tu "JAMA Facial Plastic Surgery".	A potom tu je ešte „JAMA Facial Plastic Surgery".	0.667	0.778	0.778	0.778	0.778	0.33	0.12	0	0	0.333	0.444	0.444	0.444	0.444	0.66	0.38	0.14	0	-0.334	-0.334	-0.334	-0.334	-0.334	0.33	0.26	0.14	0	C
135	10	d135s10	Die Zeitschrift beschäftigt sich damit, wie Schönheitschirurgen Menschen "schöner" aussehen lassen können - was immer das heißen mag.	Predmet sa zaoberá ako plastickí chirurgovia ľudia "krásny" časopis môže vyzerať - čo to znamená.	Časopis sa zaoberá ako robia plastickí chirurgovia ľudí "krásnymi" no neplatí to vždy..	Tento časopis sa zaoberá témou, ako môžu plastickí chirurgovia urobiť ľudí "krajšími" - takýmto slovom to môžeme ešte stále nazvať.	0.6	0.75	0.75	0.75	0.65	0.4	0.1	0	0	0.6	0.6	0.6	0.6	0.6	0.4	0.16	0.05	0	0	-0.15	-0.15	-0.15	-0.05	0	0.06	0.05	0	C
135	11	d135s11	Der meistgelesene Artikel der vergangenen 30 Tage:	Najčítanejšie príbeh o posledných 30 dňoch:	Najčítanejšie článok za posledných 30 dňoch:	Najčítanejší článok za posledných 30 dní bol:	0.714	0.714	0.714	0.714	0.571	0.28	0.17	0	0	0.429	0.429	0.429	0.429	0.286	0.57	0.51	0.42	0.28	-0.285	-0.285	-0.285	-0.285	-0.285	0.29	0.34	0.42	0.28	C
135	12	d135s12	Wie man mit einer bestimmten Lifting-Methode das Gesicht verjüngt.	Ako omladzuje tvár s konkrétnym spôsobu zdvihu.	Ako omladiť tvár s konkrétnym spôsobu liftingu.	Ako si môžeme omladiť tvár pomocou špeciálnej liftingovej metódy.	0.778	0.778	0.778	0.778	0.778	0.22	0	0	0	0.667	0.667	0.667	0.667	0.667	0.33	0.12	0	0	-0.111	-0.111	-0.111	-0.111	-0.111	0.11	0.12	0	0	C
135	13	d135s13	Das neueste Untersuchungsobjekt ist:	Poslednej skúšky sa:	Poslednej predmetom výskumu je:	Posledným predmetom vyšetrovania je:	1	1	1	1	0.75	0	0	0	0	0.5	0.5	0.5	0.5	0.25	0.5	0	0	0	-0.5	-0.5	-0.5	-0.5	-0.5	0.5	0	0	0	C
135	14	d135s14	Wie groß sind die perfekten Lippen?	Aké veľké sú dokonalými pery?	Aké veľké sú perfektné pery?	Aké veľké sú dokonalé pery?	0.2	0.2	0.2	0.2	0.2	0.8	0.5	0.33	0	0.2	0.2	0.2	0.2	0.2	0.8	0.5	0.33	0	0	0	0	0	0	0	0	0	0	C
135	15	d135s15	Genauer gesagt die perfekten Lippen von Frauen.	Presnejšie povedané, perfektné pery žien.	Presnejšie povedané, perfektné pery žien.	Presnejšie povedané, dokonalé pery žien.	0.2	0.2	0.2	0.2	0.2	0.8	0.5	0	0	0.2	0.2	0.2	0.2	0.2	0.8	0.5	0	0	0	0	0	0	0	0	0	0	0	C
135	16	d135s16	Noch genauer gesagt die perfekten Lippen von weißen Frauen zwischen 18 und 25 Jahren.	Ešte presnejšie špecifikované, perfektné pery bielych žien vo veku 18 až 25 rokov.	Ešte presnejšie špecifikované, perfektné pery bielych žien vo veku 18 až 25 rokov.	A ak by sme to chceli definovať ešte presnejšie, dokonalé pery bielych žien vo veku od 18 do 25 rokov.	0.5	0.55	0.55	0.55	0.55	0.5	0.32	0.17	0.13	0.5	0.55	0.55	0.55	0.55	0.5	0.32	0.17	0.13	0	0	0	0	0	0	0	0	0	C
135	17	d135s17	Dazu wurden insgesamt rund 600 Probanden in zwei Runden Fotos von Gesichtern gezeigt.	Vzhľadom k tomu, celkovo 600 subjektov bolo ukázané v dvoch kolách obrazy tvárí.	Vzhľadom k tomu, celkovo 600 subjektom boli ukázané v dvoch kolách obrazy tvárí.	Celkovo sme ukázali približne 600 dobrovoľníkom dve kolá fotografií rôznych tvárí.	0.909	1	1	1	0.818	0.23	0	0	0	0.909	1	1	1	0.818	0.23	0	0	0	0	0	0	0	0	0	0	0	0	C
135	18	d135s18	Die Lippengröße wurde mittels digitaler Bildbearbeitung variiert.	Veľkosť peru meniť pomocou digitálneho spracovania obrazu.	Veľkosť pier bola zmenená pomocou digitálneho spracovania obrazu.	Veľkosť pier bola na fotografiách digitálne pozmenená.	0.857	0.857	0.857	0.857	0.857	0.14	0	0	0	0.714	0.714	0.714	0.714	0.714	0.37	0.28	0.16	0	-0.143	-0.143	-0.143	-0.143	-0.143	0.23	0.28	0.16	0	C
135	19	d135s19	Die Teilnehmer. Das Ergebnis: mussten jeweils die Attraktivität bewerten	Účastníci museli hodnotiť príťažlivosť každého z nich.	Účastníci museli hodnotiť príťažlivosť každého z nich.	Účastníci mali hodnotiť atraktívnosť jednotlivých pier.	0.833	0.833	0.833	0.833	0.833	0.28	0	0	0	0.833	0.833	0.833	0.833	0.833	0.28	0	0	0	0	0	0	0	0	0	0	0	0	C
135	20	d135s20	http://jamanetwork.com/journals/jamafacialplasticsurgery/fullarticle/2601230	http://jamanetwork.com/journals/jamafacialplasticsurgery/fullarticle/2601230	http://jamanetwork.com/journals/jamafacialplasticsurgery/fullarticle/2601230	http://jamanetwork.com/journals/jamafacialplasticsurgery/fullarticle/2601230	1	1	0	1	0	0	0	0	0	1	1	0	1	0	0	0	0	0	0	0	0	0	0	0	0	0	0	C
135	21	d135s21	Artikel in JAMA Facial Plastic Surgery	výsledok:	Článok v JAMA Facial Plastic Surgery	Článok v JAMA Facial Plastic Surgery	1	1	1	1	0.833	0	0	0	0	0	0	0	0	0	1	1	1	1	-1	-1	-1	-1	-0.833	1	1	1	1	C
135	22	d135s22	Bei den perfekten Lippen ist die Unterlippe doppelt so groß wie die Oberlippe.	? Pre dokonalé pery, spodná výstupok je dvakrát tak veľký ako horná pera.	U dokonalých pier je spodná pera dvakrát tak veľká ako horná pera.	Pri dokonalých perách je spodná pera dvakrát väčšia ako horná.	0.7	0.9	0.9	0.9	0.8	0.46	0.08	0	0	0.5	0.5	0.5	0.5	0.4	0.66	0.36	0.2	0.11	-0.2	-0.4	-0.4	-0.4	-0.4	0.2	0.28	0.2	0.11	C
135	23	d135s23	Die Fläche der Lippen nimmt zehn Prozent des unteren Gesichtsdrittels ein.	? Oblasť pier trvá desať percent dolnej tretine tváre.	Plocha pier zaberá desať percent dolnej tretiny tváre.	Plocha, ktorú dokonalé pery zaberajú na tvári, tvorí 10 percent zo spodnej tretiny tváre.	0.857	0.857	0.857	0.857	0.786	0.14	0	0	0	0.786	0.786	0.786	0.786	0.714	0.21	0.08	0	0	-0.071	-0.071	-0.071	-0.071	-0.072	0.07	0.08	0	0	C
135	24	d135s24	Sie finden das absurd?	Nájdete absurdné?	Považujete to za absurdné?	Myslíte si, že je to absurdné?	0.833	0.833	0.833	0.833	0.667	0.16	0	0	0	0.667	0.833	0.833	0.833	0.667	0.33	0	0	0	-0.166	0	0	0	0	0.17	0	0	0	C
135	25	d135s25	Wir auch.	Tiež sme.	My tiež.	My tiež.	0.5	1	1	1	0.5	0.5	0	0	0	0	0	0	0	0	1	1	0	0	-0.5	-1	-1	-1	-0.5	0.5	1	0	0	C
135	26	d135s26	In einem nicht ganz ernst gemeinten Wettbewerb können Sie daher hier die schönsten Lippen wählen - ganz unwissenschaftlich und natürlich für Männer und Frauen.	V nie celkom vážnu konkurenciu, môžete si teda vybrať tú najkrajšiu pery - úplne nevedecké a, samozrejme, pre mužov aj ženy.	V jednej, nie veľmi vážne vnímanej súťaži, si môžete teda vybrať tie najkrajšie pery - úplne neodborne a samozrejme, u mužov aj žien.	V jednej, nie veľmi vážne vnímanej súťaži, si môžete vybrať tie najkrajšie pery - úplne nevedecky a samozrejme, takisto u mužov, ako aj u žien.	0.52	0.56	0.56	0.56	0.56	0.48	0.12	0.04	0	0.12	0.2	0.2	0.2	0.2	0.84	0.62	0.48	0.41	-0.4	-0.36	-0.36	-0.36	-0.36	0.36	0.5	0.44	0.41	C
135	27	d135s27	Finden Sie heraus, ob Sie das Ergebnis der Forscher bestätigen - und wenn nicht, ist es auch egal.	Zistite si, či sa potvrdil výsledok výskumu - a ak nie, na tom nezáleží.	Zistite si, či sa potvrdil výsledok výskumu - a ak nie, na tom nezáleží.	Takto zistíte, či sa výsledok výskumníkov potvrdí - a ak nie, je to taktiež jedno.	0.533	0.6	0.6	0.6	0.533	0.46	0.28	0.15	0.08	0.533	0.6	0.6	0.6	0.533	0.46	0.28	0.15	0.08	0	0	0	0	0	0	0	0	0	C
135	28	d135s28	Schönheit liegt, so heißt es ja, im Auge des Betrachters.	Krása je, hovoria áno, oko diváka.	Krása spočíva, ako sa hovorí, v oku diváka.	Ako sa často hovorí, krása spočíva v oku pozorovateľa.	0.889	1	1	1	0.889	0.11	0	0	0	0.222	0.667	0.667	0.667	0.556	0.77	0.38	0	0	-0.667	-0.333	-0.333	-0.333	-0.333	0.66	0.38	0	0	C
135	29	d135s29	Hier abstimmen für die schönsten Frauenlippen - danach können Sie im Slider auch sehen, wie andere Leser abgestimmt haben und zu wem Ihr Lieblingsmund gehört ("Ihre Wahl").	Hlasujte tu najkrajšia žena pery - potom môžete vidieť jazdca, ako ostatní čitatelia hlasovali, a kto je váš obľúbený ústnu časť ( "Vaša voľba").	Tu zahlasujete za najkrajšia ženské pery - potom môžete vidieť na jednotlivých slajdoch, ako hlasovali ostatní čitatelia, a komu patria najobľúbenejšie pery ( "Vaša voľba").	Tu si zvolíte najkrajšie ženské pery - následne môžete na jednotlivých stranách zbadať ako hlasovali ostatní čitatelia a komu patria najobľúbenejšie pery. („Vaša voľba“)	0.583	0.875	0.875	0.875	0.75	0.41	0.08	0	0	0.375	0.417	0.417	0.417	0.417	0.68	0.5	0.34	0.27	-0.208	-0.458	-0.458	-0.458	-0.333	0.27	0.42	0.34	0.27	C
135	30	d135s30	http://www.spiegel.de/wissenschaft/mensch/schoenheit-wie-die-perfekten-lippen-aussehen-a-1135061.html	http://www.spiegel.de/wissenschaft/mensch/schoenheit-wie-die-perfekten-lippen-aussehen-a-1135061.html	http://www.spiegel.de/wissenschaft/mensch/schoenheit-wie-die-perfekten-lippen-aussehen-a-1135061.html	http://www.spiegel.de/wissenschaft/mensch/schoenheit-wie-die-perfekten-lippen-aussehen-a-1135061.html	0	0	0	0	0	1	0	0	0	0	0	0	0	0	1	0	0	0	0	0	0	0	0	0	0	0	0	C
136	1	d136s1	REUTERS	REUTERS	REUTERS	Reuters	0	0	0	0	0	1	0	0	0	0	0	0	0	0	1	0	0	0	0	0	0	0	0	0	0	0	0	B
136	2	d136s2	Cannabis-Ernte in Israel	Konope zber v Izraeli	Zber konopy v Izraeli	Konopa siata, Izrael	1	1	1	1	1	0	0	0	0	1	1	1	1	1	0	0	0	0	0	0	0	0	0	0	0	0	0	B
136	3	d136s3	Montag, 20.02.2017 10:58 Uhr	Pondelok, 20/02/2017 10:58	Pondelok, 20/02/2017 10:58	Pondelok, 20.02.2017 10:58	0.333	0.333	0.333	0.333	0.333	0.66	0	0	0	0.333	0.333	0.333	0.333	0.333	0.66	0	0	0	0	0	0	0	0	0	0	0	0	B
136	4	d136s4	Medizinisches Cannabis Sehr beliebt, kaum erforscht	Liečivé konope Veľmi obľúbená, veľmi málo výskumov	Liečivá konopa Veľmi obľúbená, veľmi málo preskúmaná	Konopa lekárska: Veľmi obľúbená, sotva preskúmaná	0.833	0.833	0.833	0.833	0.667	0.42	0.16	0	0	0.5	0.667	0.667	0.667	0.5	0.71	0.16	0	0	-0.333	-0.166	-0.166	-0.166	-0.167	0.29	0	0	0	B
136	5	d136s5	Schwerkranke Patienten in Deutschland können bald Cannabis auf Rezept erhalten, bezahlt von der Krankenkasse.	Kriticky chorých pacientov v Nemecku môže čoskoro získať konope na predpis sa vzťahuje zdravotného poistenia.	Kriticky chorí pacienti si budú môcť v Nemecku čoskoro nechať predpísať u lekára konopu, preplatenú zdravotnou poisťovňou.	Ťažko chorí pacienti v Nemecku si čoskoro budú môcť nechať u lekára predpísať konopu, preplatenú zdravotnou poisťovňou.	0.824	0.824	0.824	0.824	0.765	0.17	0.06	0	0	0.176	0.588	0.588	0.588	0.412	0.84	0.33	0.05	0	-0.648	-0.236	-0.236	-0.236	-0.353	0.67	0.27	0.05	0	B
136	6	d136s6	Doch welche Nebenwirkungen gibt es?	Ale aké sú vedľajšie účinky?	Ale aké sú jej vedľajšie účinky?	Avšak aké sú jej vedľajšie účinky?	0.333	0.333	0.333	0.333	0.167	0.66	0.41	0	0	0.167	0.167	0.167	0.167	0	0.83	0.8	0.75	0.66	-0.166	-0.166	-0.166	-0.166	-0.167	0.17	0.39	0.75	0.66	B
136	7	d136s7	Und welche Dosis ist empfehlenswert?	A čo dávka sa odporúča?	A aká dávka sa odporúča?	A aké dávky sa odporúčajú?	0.6	0.6	0.6	0.6	0.6	0.4	0	0	0	0.6	0.6	0.6	0.6	0.6	0.4	0	0	0	0	0	0	0	0	0	0	0	0	B
136	8	d136s8	Cannabis ist die am häufigsten konsumierte illegale Droge in Deutschland.	Konope je najčastejšie užívanou nelegálnou drogou v Nemecku.	Konope je najčastejšie užívanou nelegálnou drogou v Nemecku.	Konopa je najčastejšie užívanou drogou v Nemecku	0.286	0.286	0.286	0.286	0.143	0.75	0.57	0.33	0	0.286	0.286	0.286	0.286	0.143	0.75	0.57	0.33	0	0	0	0	0	0	0	0	0	0	B
136	9	d136s9	In einigen Ländern ist die Pflanze aber auch als Medizin zugelassen, vor allem für chronische Schmerzpatienten, denen alle konventionellen Mittel nicht ausreichend helfen.	V niektorých krajinách rastlín, ale je tiež schválený ako liek, a to najmä u pacientov s chronickou bolesťou, kde sú všetky bežné prostriedky nepomôžu dosť.	V niektorých krajinách je rastlina povolená aj ako liek, a to najmä pre pacientov s chronickými bolesťami, ktorým všetky bežné prostriedky viac nepomôžu.	V niektorých krajinách je táto rastlina povolená aj ako liek, najmä pre chronicky chorých pacientov, ktorým všetky konvenčné prostriedky už dostatočne nepomáhajú.	0.682	0.818	0.818	0.818	0.682	0.4	0.12	0.04	0	0.364	0.5	0.5	0.5	0.409	0.65	0.4	0.23	0.15	-0.318	-0.318	-0.318	-0.318	-0.273	0.25	0.28	0.19	0.15	B
136	10	d136s10	Ab März gibt es dann auch in Deutschland Cannabis für Schwerkranke auf Rezept.	V marci, tam je potom tiež v Nemecku konope pre ťažko chorých pacientov na predpis.	V marci budú môcť ťažko chorí pacienti dostať konopu na predpis aj v Nemecku.	Od marca bude možné dať si predpísať konopu u lekára aj v Nemecku.	1	1	1	1	0.846	0.2	0.07	0	0	0.769	0.769	0.769	0.769	0.692	0.35	0.15	0.08	0	-0.231	-0.231	-0.231	-0.231	-0.154	0.15	0.08	0.08	0	B
136	11	d136s11	Doch es gibt viele Fragen:	Ale existuje veľa otázok:	Ale existuje veľa otázok:	Avšak existuje mnoho otázok:	0.5	0.5	0.5	0.5	0.25	0.5	0	0	0	0.5	0.5	0.5	0.5	0.25	0.5	0	0	0	0	0	0	0	0	0	0	0	0	B
136	12	d136s12	Wie sicher ist die Einnahme?	Ako bezpečné je dávka?	Je bezpečné jej užívanie?	Je užívanie konopy bezpečné?	0.5	1	1	1	0.75	0.5	0	0	0	0.25	0.75	0.75	0.75	0.75	0.75	0	0	0	-0.25	-0.25	-0.25	-0.25	0	0.25	0	0	0	B
136	13	d136s13	Welche Nebenwirkungen drohen?	Aké vedľajšie účinky ohroziť?	Aké vedľajšie účinky hrozia?	Aké vedľajšie účinky hrozia?	0.25	0.25	0.25	0.25	0.25	0.75	0.66	0.5	0	0	0	0	0	0	1	1	1	1	-0.25	-0.25	-0.25	-0.25	-0.25	0.25	0.34	0.5	1	B
136	14	d136s14	Was sind mögliche Langzeiteffekte?	Aké sú možné dlhodobé účinky?	Aké sú možné dlhodobé účinky?	Aké sú možné dlhodobé účinky?	0	0	0	0	0	1	1	1	1	0	0	0	0	0	1	1	1	1	0	0	0	0	0	0	0	0	0	B
136	15	d136s15	Und welche Dosierung ist überhaupt empfehlenswert?	A aké dávkovanie je odporúčané vôbec?	A aké dávkovanie je vôbec odporúčané?	A aké dávkovanie je odporúčané?	0.2	0.2	0.2	0.2	0.2	0.83	0.8	0.75	0.66	0.2	0.2	0.2	0.2	0.2	0.83	0.6	0.5	0.33	0	0	0	0	0	0	-0.2	-0.25	-0.33	B
136	16	d136s16	Auf all diese Fragen gibt es bisher nur unzureichende Antworten.	Na všetky tieto otázky existuje nenaplnená odpovede.	Všetky tieto otázky sú doposiaľ nezodpovedané.	Na všetky tieto otázky zatiaľ neexistujú dostatočné odpovede.	0.375	0.375	0.375	0.375	0.375	0.62	0.43	0.35	0.21	0.625	0.625	0.625	0.625	0.625	0.37	0.3	0.18	0	0.25	0.25	0.25	0.25	0.25	-0.25	-0.13	-0.17	-0.21	B
136	17	d136s17	Normalerweise durchlaufen Medikamente, ehe sie auf den Markt kommen, diverse Studien, in denen unter anderem die Sicherheit erforscht wird.	Za normálnych okolností prostredníctvom liekov, než sa dostanú na trh, rôzne štúdie, v ktorej okrem iného, bezpečnosť je preskúmaná.	Za normálnych okolností sa vykonávajú rôzne štúdie, než sa dostanú lieky na trh, v ktorých je okrem iného preskúmaná ich bezpečnosť.	Obvykle skôr než nejaký liek príde na trh, musí prejsť rozličnými štúdiami, v ktorých sa okrem iného skúma aj ich bezpečnosť.	0.619	0.857	0.857	0.857	0.714	0.38	0.1	0	0	0.571	0.762	0.762	0.762	0.571	0.5	0.19	0	0	-0.048	-0.095	-0.095	-0.095	-0.143	0.12	0.09	0	0	B
136	18	d136s18	Besser als Placebo?	Lepšie ako placebo?	Lepšie ako placebo?	Lepšie než placebo?	0.333	0.333	0.333	0.333	0.333	0.66	0	0	0	0.333	0.333	0.333	0.333	0.333	0.66	0	0	0	0	0	0	0	0	0	0	0	0	B
136	19	d136s19	Medizinisches Cannabis aber hat oft einen anderen Weg genommen.	Medicinal cannabis, ale často vydali inou cestou.	Lekárska konopa sa ale vydala inou cestou.	Lekárska konopa sa však často uberala inou cestou	0.625	0.625	0.625	0.625	0.5	0.37	0.14	0	0	0.375	0.375	0.375	0.375	0.375	0.62	0.43	0.17	0	-0.25	-0.25	-0.25	-0.25	-0.125	0.25	0.29	0.17	0	B
136	20	d136s20	In Kanada beispielsweise sind Bürger in den Neunzigerjahren vor Gericht gezogen, um ihr Recht auf Cannabis als Medikament einzuklagen.	V Kanade, napríklad, občania sú kreslené v deväťdesiatych rokoch k súdu presadiť svoje právo na konope ako liek.	Napríklad v Kanade sa občania v deväťdesiatych rokoch snažili pred súdom presadiť svoje právo na konopu ako liek.	Napríklad v Kanade sa v 90. rokoch občania snažili presadiť pred súdom právo konopy ako lieku.	0.563	0.813	0.813	0.813	0.688	0.5	0.05	0	0	0.313	0.563	0.563	0.563	0.5	0.72	0.23	0.12	0.06	-0.25	-0.25	-0.25	-0.25	-0.188	0.22	0.18	0.12	0.06	B
136	21	d136s21	Inzwischen gilt das einem weiteren Gerichtsurteil zufolge nicht nur für getrocknetes Cannabis, sondern auch für Blüten oder Öle, die Kanadier mit einer entsprechenden Erlaubnis kaufen können.	Zatiaľ sa to týka ďalšieho rozhodnutia súdu Podľa môže kúpiť nielen pre sušené konope, ale aj pre kvety alebo oleje, ktoré Kanaďania s príslušným povolením.	Medzitým došlo k ďalšiemu rozhodnutiu súdu, podľa ktorého si človek v Kanade môže kúpiť nielen sušené konope, ale aj konopu vo forme kvetov alebo olejov.	Medzičasom došlo aj k ďalšiemu súdnemu rozhodnutiu, ktoré platí nie len pre sušenú konopu, ale tiež pre kvety alebo oleje, ktoré môžu Kanaďania nakupovať s príslušným povolením.	0.519	0.593	0.593	0.593	0.556	0.44	0.23	0.16	0.08	0.704	0.852	0.852	0.852	0.778	0.29	0.03	0	0	0.185	0.259	0.259	0.259	0.222	-0.15	-0.2	-0.16	-0.08	B
136	22	d136s22	Systematisch erforscht werden mögliche Nebenwirkungen und Wirkungen jedoch erst seit Kurzem.	sa preskúmať systematicky možných vedľajších účinkov a efektov, ale len nedávno.	Systematicky sa skúmali možné vedľajšie účinky a efekty len nedávno.	Možné vedľajšie účinky a vplyvy sa systematicky skúmali avšak len prednedávnom.	0.636	0.909	0.909	0.909	0.818	0.36	0	0	0	0.273	0.818	0.818	0.818	0.636	0.72	0.3	0.22	0.12	-0.363	-0.091	-0.091	-0.091	-0.182	0.36	0.3	0.22	0.12	B
136	23	d136s23	Gute wissenschaftliche Belege gibt es dafür, dass Cannabis bei chronischem Schmerz helfen kann und bei Übelkeit während einer Chemotherapie besser hilft als Placebo.	Dostatočnými vedeckými dôkazmi je tam, že konope môže pomôcť s chronickou bolesťou a lepšie pomáha nevoľnosť pri chemoterapii v porovnaní s placebom.	Dostatočným vedeckým dôkazom je to, že konope môže pomôcť s chronickou bolesťou a zmierňuje tiež nevoľnosť pri chemoterapii lepšie ako placebo.	Existujú dostatočné vedecké dôkazy, že konopa môže pomôcť pri chronických bolestiach, a pri nevoľnosti počas chemoterapie pomáha lepšie ako placebo.	0.7	0.9	0.9	0.9	0.8	0.31	0.04	0	0	0.6	0.7	0.7	0.7	0.65	0.38	0.15	0.05	0	-0.1	-0.2	-0.2	-0.2	-0.15	0.07	0.11	0.05	0	B
136	24	d136s24	Ebenso könne es die schmerzhaften Muskelanspannungen und Verkrampfungen bei Multipler Sklerose lindern, sagt Staci Gruber von der Harvard Medical School auf der US-Wissenschaftskonferenz AAAS in Boston.	Podobne, mohlo by to zmierniť bolestivé svalové napätie a kŕčov pri roztrúsenej skleróze, hovorí Staci Gruber z Harvard Medical School v americkom sci konferencii AAAS v Bostone.	Podobne by mohla zmierniť bolestivé svalové napätie a kŕče pri skleróze Multiplex, hovorí Staci Gruberová z Harvardskej lekárskej fakulty na americkej vedeckej konferencii AAAS v Bostone.	Rovnako dokáže zmierniť bolestivé svalové napätie a kŕče pri skleróze Multiplex, povedal Staci Gruber z Harvardskej lekárskej školy na americkej vedeckej konferencii Americkej asociácie pre rozvoj vedy (AAAS) v Bostone.	0.567	0.667	0.667	0.667	0.6	0.46	0.24	0.14	0.07	0.333	0.4	0.4	0.4	0.367	0.63	0.48	0.36	0.26	-0.234	-0.267	-0.267	-0.267	-0.233	0.17	0.24	0.22	0.19	B
136	25	d136s25	Bei allen anderen Beschwerden ist die Datenlage dünn.	Pri všetkých ostatných sťažností, dáta vrstva je tenká.	Pri všetkých ostatných sťažnostiach existuje málo informácií.	Pri všetkých ostatných sťažnostiach sú dôkazy nedostačujúce.	0.714	0.714	0.714	0.714	0.714	0.37	0.28	0.16	0	0.429	0.429	0.429	0.429	0.429	0.57	0.5	0.4	0.25	-0.285	-0.285	-0.285	-0.285	-0.285	0.2	0.22	0.24	0.25	B
136	26	d136s26	2015 hatte ein internationales Forscherteam 28 Datenbanken auf der Suche nach Studien durchgeforstet, die sich mit der Wirkung von Cannabis als Medikament auseinandergesetzt hatten.	2015 mal medzinárodným výskumným tímom 28 databáz pri hľadaní štúdií durchgeforstet, ktorí sa zaoberal účinkami konope ako liek.	V roku 2015 preskúmal medzinárodný výskumným tímom 28 databáz pri hľadaní štúdií, ktoré sa zaoberali účinkami konopy ako lieku.	Medzinárodný tím výskumníkov v roku 2015 preskúmal pri hľadaní štúdií 28 databáz, ktoré by dokázali presadiť vplyv liečivých účinkov konopy.	0.7	0.85	0.85	0.85	0.8	0.3	0.15	0.05	0	0.4	0.75	0.75	0.75	0.65	0.59	0.31	0.16	0.05	-0.3	-0.1	-0.1	-0.1	-0.15	0.29	0.16	0.11	0.05	B
137	1	d137s1	Mike Pence widens US rift with Europe over Nato defence spending	Mike Pence rozširuje amerických roztržku s Európou nad výdavkami na obranu NATO	Mike Pence rozširuje americký spor s Európou týkajúci sa výdavkov na obranu NATO	Mike Pence prehlbuje spor Spojených štátov s Európou týkajúci sa výdavkov na obranu organizácie Nato	0.533	0.533	0.533	0.533	0.533	0.46	0.21	0	0	0.267	0.333	0.333	0.333	0.333	0.73	0.5	0.39	0.34	-0.266	-0.2	-0.2	-0.2	-0.2	0.27	0.29	0.39	0.34	C
137	2	d137s2	On first visit to Europe since taking office, US vice-president tells Munich conference Nato allies must step up their contributions	Na prvej návšteve Európy od nástupu do úradu, americký viceprezident hovorí mníchovskou konferencii NATO spojenci musia zvýšiť svoje príspevky	Na prvej návšteve Európy od nástupu do úradu, americký viceprezident hovorí na mníchovskej konferencii NATO, že spojenci musia zvýšiť svoje príspevky	Na svojej prvej návšteve Európy, odkedy prevzal úrad, americký viceprezident na konferencii v Mníchove tvrdí, že spojenci organizácie NATO musia zvýšiť svoje príspevky	0.391	0.565	0.565	0.565	0.565	0.56	0.27	0.14	0.05	0.348	0.522	0.522	0.522	0.522	0.65	0.31	0.14	0.05	-0.043	-0.043	-0.043	-0.043	-0.043	0.09	0.04	0	0	C
137	4	d137s4	On his first visit to Europe since taking office, Mike Pence said “some of our largest allies do not have a credible path” towards paying their share of Nato’s financial burden.	Na svojej prvej návšteve Európy od nástupu do úradu, Mike Pence povedal: "niektoré z našich najväčších spojencov nemajú vierohodnou cestu" k plateniu svoj podiel na finančnej záťaže NATO.	Na svojej prvej návšteve Európy od nástupu do úradu, Mike Pence povedal: "Niektorí z našich najväčších spojencov nemajú vierohodnoú cestu k splateniu svojho podielu finančnej záťaže NATO.	Počas jeho prvej návštevy Európy odkedy prevzal úrad Mike Pence povedal: „niektorí z vašich najväčších spojencov nekráčajú vierohodnou cestou k splateniu svojho podielu finančného bremena organizácie NATO.	0.63	0.63	0.63	0.63	0.593	0.39	0.11	0.03	0	0.556	0.556	0.556	0.556	0.519	0.46	0.22	0.11	0.04	-0.074	-0.074	-0.074	-0.074	-0.074	0.07	0.11	0.08	0.04	C
137	5	d137s5	Although he did not name individual countries, his targets included Germany, France and Italy.	Hoci nemal vymenovať jednotlivé krajiny, jeho ciele zahrnuté Nemecko, Francúzsko a Taliansko.	Hoci nemenoval jednotlivé krajiny, jeho ciele zahŕňajú Nemecko, Francúzsko a Taliansko.	Napriek tomu, že krajiny nemenoval jednotlivo, jeho cieľom je Nemecko, Francúzsko a Taliansko.	0.538	0.615	0.615	0.615	0.538	0.46	0.25	0.18	0.1	0.462	0.538	0.538	0.538	0.462	0.53	0.25	0.18	0.1	-0.076	-0.077	-0.077	-0.077	-0.076	0.07	0	0	0	C
137	6	d137s6	“The time has come to do more,” he said.	"Nastal čas, aby sa viac," povedal.	"Nastal čas, aby sa urobilo viac," povedal.	„Nastal čas urobiť viac,“ povedal.	0.8	0.8	0.8	0.8	0.6	0.33	0	0	0	1	1	1	1	0.6	0.28	0	0	0	0.2	0.2	0.2	0.2	0	-0.05	0	0	0	C
137	7	d137s7	This section of his speech to the Munich security conference, which is being attended by 500 delegates including government leaders and defence and foreign ministers from around the world, was greeted with lukewarm applause.	Táto časť jeho prejavu na bezpečnostnej konferencii v Mníchove, ktorý sa zúčastnilo 500 delegátov, vrátane vládnych predstaviteľov a obrany a zahraničných vecí z celého sveta, bol pozdravený s vlažnou potleskom.	Táto časť jeho prejavu na bezpečnostnej konferencii v Mníchove, ktorej sa zúčastnilo 500 delegátov, vrátane vládnych predstaviteľov a ministrov obrany a zahraničných vecí z celého sveta, sa stretla s vlažným potleskom.	Táto časť jeho prejavu na bezpečnostnej konferencii v Mníchove, na ktorej sa zúčastnilo 500 delegátov vrátane vládnych lídrov, lídrov obrany a zahraničncýh ministrov z celého sveta, sa stretla s vlažným aplauzom.	0.258	0.323	0.323	0.323	0.323	0.7	0.53	0.41	0.32	0.129	0.226	0.226	0.226	0.226	0.87	0.7	0.58	0.5	-0.129	-0.097	-0.097	-0.097	-0.097	0.17	0.17	0.17	0.18	C
137	8	d137s8	He was speaking immediately after the German chancellor, Angela Merkel, made it clear she would not be bullied by the US over defence spending.	On bol okamžite hovoriť po tom, čo nemecká kancelárka Angela Merkelová dala jasne najavo, že by nemal byť nútený USA cez obranu výdavkov.	Hovoril hneď po tom, čo nemecká kancelárka Angela Merkelová dala jasne najavo, že sa nenechá zastrašovať USA kvôli zvyšovaniu výdavkov.	Rozprával ihneď po tom, ako nemecká kancelárka Angela Merkelová dala jasne najavo, že sa nenechá zastrašovať Spojenými štátmi kvôli výdavkom na obranu.	0.545	0.636	0.636	0.636	0.545	0.47	0.36	0.28	0.25	0.364	0.364	0.364	0.364	0.318	0.63	0.52	0.45	0.42	-0.181	-0.272	-0.272	-0.272	-0.227	0.16	0.16	0.17	0.17	C
137	9	d137s9	She said Germany had made a promise to increase defence over the next decade and would fulfil that commitment rather than be forced into the faster rises that Trump is looking for.	Povedala, že Nemecko urobil sľub zvýšiť obranu cez nasledujúce desaťročie a bol by splnenie tohto záväzku, skôr než byť nútený do rýchlejších stúpa že Trump je hľadajú.	Povedala, že Nemecko sľúbilo, že zvýši obranu počas nasledujúceho desaťročia a radšej by splnilo tento záväzok, než by malo byť nútené do rýchlejších zvýšenia výdavkov, ktoré žiada Trump.	Povedala, že Nemecko prisľúbilo zvýšiť obranu na nasledujúce desaťročie a radšej splní tento záväzok než by malo byť nútené do rýchleho zvýšenia, ktoré vyžaduje Trump.	0.56	0.68	0.68	0.68	0.64	0.51	0.19	0.08	0	0.48	0.48	0.48	0.48	0.48	0.65	0.32	0.18	0.11	-0.08	-0.2	-0.2	-0.2	-0.16	0.14	0.13	0.1	0.11	C
137	10	d137s10	Merkel said the focus on defence spending could be misleading.	Merkelová povedal, že zameranie na výdavkoch na obranu by mohli byť zavádzajúce.	Merkelová povedal, že zameranie na výdavky na obranu by mohlo byť zavádzajúce.	Merkelová sa vyjadrila, že zameranie sa na výdavky obrany by mohlo byť zavádzajúce.	0.462	0.538	0.538	0.538	0.538	0.61	0.16	0	0	0.308	0.385	0.385	0.385	0.385	0.76	0.41	0.18	0.1	-0.154	-0.153	-0.153	-0.153	-0.153	0.15	0.25	0.18	0.1	C
137	10	d137s10	Merkel said the focus on defence spending could be misleading.	Merkelová povedal, že zameranie na výdavkoch na obranu by mohli byť zavádzajúce.	Merkelová povedal, že zameranie na výdavky na obranu by mohlo byť zavádzajúce.	Merkelová sa vyjadrila, že zameranie sa na výdavky obrany by mohlo byť zavádzajúce.	0.462	0.538	0.538	0.538	0.538	0.61	0.16	0	0	0.308	0.385	0.385	0.385	0.385	0.76	0.41	0.18	0.1	-0.154	-0.153	-0.153	-0.153	-0.153	0.15	0.25	0.18	0.1	C
137	11	d137s11	Even if Germany was to spend more, there was not the military capacity available to invest in. She added that Germany saw spending on development in countries in Africa and elsewhere as vital to security as military spending.	Dokonca aj keď Nemecko bolo minúť viac, nebol vojenský potenciál k dispozícii investovať. Dodala, že Nemecko videl výdavky na vývoj v krajinách v Afrike aj inde životne dôležité pre bezpečnosť, ako vojenských výdavkov.	Dokonca aj keby Nemecko malo minúť viac, nebola by k dispozícii vojenská kapacita, do ktorej investovať. Dodala, že Nemecko vidí výdavky na vývoj v krajinách Afriky aj inde rovnako dôležité pre bezpečnosť, ako aj vojenských výdavkov.	Aj keby malo Nemecko minúť viac, nemalo by dostatočnú dostupnú vojenskú kapacitu, do ktorej by investovalo. Dodala, že Nemecko vidí výdavky penazí na rozvoj v krajinách Afriky a kdekoľvek inde tak nevyhnutné pre bezpečnosť ako sú aj vojenské výdavky.	0.564	0.667	0.667	0.667	0.641	0.43	0.15	0.05	0	0.359	0.538	0.538	0.538	0.538	0.61	0.26	0.1	0.05	-0.205	-0.129	-0.129	-0.129	-0.103	0.18	0.11	0.05	0.05	C
137	12	d137s12	The conference marks the first major meeting between the Trump administration and leaders from across Europe since Trump took office.	Konferencia predstavuje prvý významný stretnutie medzi správou a vedúcich Trump z celej Európy, pretože Trump nastúpil do úradu.	Konferencia predstavuje prvé významné stretnutie medzi Trampovým úradom a lídermi z celej Európy, odkedy Trump nastúpil do úradu.	Konferencia predstavuje prvé významné stretnutie Trumpovej vlády a Európských lídrov odkedy Trump prevzal úrad.	0.929	0.929	0.929	0.929	0.714	0.33	0.05	0	0	0.714	0.714	0.714	0.714	0.643	0.44	0.29	0.18	0.13	-0.215	-0.215	-0.215	-0.215	-0.071	0.11	0.24	0.18	0.13	C
137	13	d137s13	Pence went further than the US defence secretary, James Mattis, at Nato headquarters on Wednesday in warning Nato allies to stump up more.	Pence išli ďalej, než minister obrany USA, James Mattis, v hlavnom sídle NATO v stredu v varovanie Nato spojencov, aby pahýľ tvorí viac.	Pence zašiel ďalej, než minister obrany USA, James Mattis, v hlavnom sídle NATO, kde v stredu varoval Nato spojencov, aby vysolili viac.	Pence zašiel ďalej ako americký minister obrany, James Mattis, ktorý v stredu v centrále NATO varoval varoval spojencov NATO, aby vysolili viac.	0.391	0.609	0.609	0.609	0.565	0.65	0.18	0.04	0	0.217	0.522	0.522	0.522	0.478	0.73	0.31	0.09	0	-0.174	-0.087	-0.087	-0.087	-0.087	0.08	0.13	0.05	0	C
137	14	d137s14	He said:	Povedal:	Povedal:	Povedal:	0	0	0	0	0	1	0	0	0	0	0	0	0	0	1	0	0	0	0	0	0	0	0	0	0	0	0	C
138	1	d138s1	The English have placed a bomb under the Irish peace process	Angličania umiestnili bombu za írskeho mierového procesu	Angličania umiestnili bombu pod írsky mierový proces	Angličania umiestnili časovanú bombu pod írsky mierový proces	0.625	0.625	0.625	0.625	0.625	0.37	0.14	0	0	0.125	0.125	0.125	0.125	0.125	0.87	0.72	0.52	0.43	-0.5	-0.5	-0.5	-0.5	-0.5	0.5	0.58	0.52	0.43	B
138	2	d138s2	Fintan O'Toole	Fintan O'Toole	Fintan O'Toole	Autor: Fintan O´Toole	0.667	0.667	0.667	0.667	0.667	0.33	0	0	0	0.667	0.667	0.667	0.667	0.667	0.33	0	0	0	0	0	0	0	0	0	0	0	0	B
138	3	d138s3	The vote for Brexit unthinkingly jeopardises the Good Friday Agreement, the greatest modern achievement of British diplomacy.	Hlasovanie pre Brexit bezmyšlienkovite ohrozuje dobrú zhodu piatok najväčšou moderné dosiahnutie britskej diplomacie.	Hlasovanie pre Brexit bezmyšlienkovite ohrozuje veľkopiatkovú dohodu, najväčšie moderné dosiahnutie britskej diplomacie.	Hlasovanie v prospech Brexitu nepremyslene ohrozuje Veľkopiatkovú dohodu, ktorá je najväčším novodobým úspechom britskej diplomacie.	0.733	0.733	0.733	0.733	0.733	0.26	0.07	0	0	0.6	0.6	0.6	0.6	0.6	0.4	0.21	0.08	0	-0.133	-0.133	-0.133	-0.133	-0.133	0.14	0.14	0.08	0	B
138	4	d138s4	It’s an insult to Ireland	Je to urážka Írska	Je to urážka pre Írsko	Pre Írsko je to urážka.	0.6	0.8	0.8	0.8	0.8	0.4	0.26	0	0	0.2	1	1	1	0.8	0.8	0.5	0	0	-0.4	0.2	0.2	0.2	0	0.4	0.24	0	0	B
138	5	d138s5	The rather patronising English joke used to be that whenever the Irish question was about to be solved, the Irish would change the question.	Trochu povýšený anglický vtip Kedysi sa, že vždy, keď írsky otázka bola o ktoré je potrebné vyriešiť, Irish by sa zmenila na otázku.	Trochu povýšený anglický vtip Kedysi sa, že vždy, keď írsku otázku bolo potrebné vyriešiť, Íri by sa zmenili otázku.	Pomerne povýšenecký anglický vtip hovoril o tom, že vždy keď už írska otázka bola takmer vyriešená, Íri otázku zmenili.	0.737	0.947	0.947	0.947	0.579	0.39	0.18	0.04	0	0.632	0.789	0.789	0.789	0.632	0.45	0.15	0.05	0	-0.105	-0.158	-0.158	-0.158	0.053	0.06	-0.03	0.01	0	B
138	6	d138s6	And now, when the Irish question seemed indeed to have been solved, at least for a generation, it is the English who have changed the question.	A teraz, keď írsky otázka zdalo vskutku boli vyriešené, aspoň pre jednu generáciu, to je anglický ktorí zmenili otázku.	A teraz, keď sa írska otázka zdala vskutku byť vyriešená, aspoň pre jednu generáciu, to sú Angličania ktorí zmenili otázku.	Teraz, keď sa už írska otázka zdala byť takmer po generáciu vyriešená, sú to Angličania, ktorí ju menia.	0.722	0.889	0.889	0.889	0.833	0.31	0.05	0	0	0.389	0.611	0.611	0.611	0.556	0.65	0.26	0.11	0	-0.333	-0.278	-0.278	-0.278	-0.277	0.34	0.21	0.11	0	B
138	7	d138s7	Recklessly, casually, with barely a thought, English nationalists have planted a bomb under the settlement that brought peace to Northern Ireland and close cordiality to relations between Britain and Ireland.	Nedbalo, ležérne, sotva myšlienkou, anglickí nacionalisti bombu v rámci vyrovnania, ktorý priniesol mier do Severného Írska a úzke srdečnosťou vo vzťahoch medzi Britániou a Írskom.	Nedbalo, ležérne, sotva myšlienkou, anglickí nacionalisti bombu v rámci vyrovnania, ktorý priniesol mier do Severného Írska a úzkou srdečnosťou vo vzťahoch medzi Britániou a Írskom.	Anglickí nacionalisti ľahkovážne, bezstarostne a bez rozmyslu umiestnili časovanú bombu pod dohodu, ktorá bola pre Severné Írsko zárukou mieru a srdečnosti vo vzťahu Británie a Írska.	0.692	0.923	0.923	0.923	0.885	0.26	0.04	0	0	0.692	0.923	0.923	0.923	0.885	0.26	0.04	0	0	0	0	0	0	0	0	0	0	0	B
138	8	d138s8	To do this seriously and soberly would have been bad.	Ak chcete to vážne a triezvo by bolo zlé.	Ak chcete to vážne a triezvo by bolo zlé.	Ak by tak urobili s vážnosťou a s rozvážnosťou, bolo by to zlé.	0.462	0.692	0.692	0.692	0.692	0.46	0	0	0	0.462	0.692	0.692	0.692	0.692	0.46	0	0	0	0	0	0	0	0	0	0	0	0	B
138	9	d138s9	To do it so carelessly, with nothing more than a pat on the head and a reassurance that everything will be all right, is frankly insulting.	Ak chcete to tak nedbalo, s ničím viac než potľapkanie po hlave a uistenie, že všetko bude v poriadku, je otvorene urážlivý.	Ak chcete to tak nedbalo, s ničím viac než potľapkaním po hlave a uistením, že všetko bude v poriadku, je otvorene urážlivé.	No fakt, že to urobili celkom nedbanlivo a iba s potľapkaním po ramene a s prísľubom, že všetko bude v poriadku, je, úprimne povedané, urážlivé.	0.48	0.64	0.64	0.64	0.6	0.4	0.2	0.17	0.13	0.4	0.56	0.56	0.56	0.52	0.48	0.25	0.17	0.13	-0.08	-0.08	-0.08	-0.08	-0.08	0.08	0.05	0	0	B
138	10	d138s10	Just five years ago, when Queen Elizabeth became the first reigning British monarch to visit southern Ireland in a century, there was a massive sense of relief.	Ešte pred piatimi rokmi, keď Queen Elizabeth sa stal prvým panujúcim britského monarchu navštíviť južné Írsko za posledných sto rokov, došlo k masívnemu pocit úľavy.	Ešte pred piatimi rokmi, keď kráľovná Alžbeta sa stala prvým panujúcim britským monarchom navštíviť južné Írsko za posledných sto rokov, došlo k masívnemu pocitu úľavy.	Len pred piatimi rokmi, kedy sa kráľovná Alžbeta stala prvým vládnúcim britským monarchom, ktorý za storočie navštívil južné Írsko, sa v krajine rozľahol obrovský pocit úľavy.	0.577	0.769	0.769	0.769	0.692	0.38	0.16	0.04	0	0.423	0.654	0.654	0.654	0.577	0.53	0.24	0.04	0	-0.154	-0.115	-0.115	-0.115	-0.115	0.15	0.08	0	0	B
138	11	d138s11	It was not just relief that the visit went off peacefully and well.	Nebolo to len úľava, že návšteva odišiel v pokoji a dobre.	Nebolo to len úľava, že návšteva odišla v pokoji a dobre.	Nebola to len úľava z toho, že návšteva prebehla v mieri a v pokoji.	0.357	0.5	0.5	0.5	0.429	0.57	0.31	0.08	0	0.357	0.5	0.5	0.5	0.429	0.57	0.31	0.08	0	0	0	0	0	0	0	0	0	0	B
138	12	d138s12	It was much deeper than that: it was relief from centuries of both British condescension and Irish Anglophobia.	Bolo to oveľa hlbšie ako to: je to úľava od stáročia oboch britskej a írskej blahosklonnosť anglofobií.	Bolo to oveľa hlbšie ako to: je to úľava od stáročia oboch britskej a írskej blahosklonnosti anglofóbie.	Táto úľava má oveľa hlbšie korene, je to úľava od britskej nadradenosti, ako aj od írskej anglofóbie.	0.353	0.706	0.706	0.706	0.647	0.64	0.25	0.13	0.07	0.294	0.647	0.647	0.647	0.588	0.7	0.25	0.13	0.07	-0.059	-0.059	-0.059	-0.059	-0.059	0.06	0	0	0	B
138	13	d138s13	A long story – often nasty, sometimes merely tediously wasteful – was over.	Dlhý príbeh - často protivný, niekedy len zdĺhavo nehospodárne - skončila.	Dlhý príbeh - často protivný, niekedy len zdĺhavo nehospodárne - skončil.	Tento dlhý príbeh, ktorý bol častokrát strašný, no niekedy len únavne zbytočný, sa skončil.	0.714	0.714	0.714	0.714	0.714	0.28	0.15	0	0	0.643	0.643	0.643	0.643	0.643	0.35	0.15	0	0	-0.071	-0.071	-0.071	-0.071	-0.071	0.07	0	0	0	B
138	14	d138s14	There was a dignified, decent, democratic settlement that allowed the natural warmth of a neighbourly relationship to come fully to the surface.	Tam bol dôstojný, slušné, demokratické osada, ktorá dovolila prirodzené teplo o susedské vzťahy plne prísť k povrchu.	Tam bola dôstojná, slušná, demokratická osada, ktorá dovolila prirodzené teplo o susedské vzťahy plne prísť k povrchu.	Prišla totiž dôstojná, prijateľná a demokratická dohoda, ktorá umožnila vrúcnym susedským vzťahom naplno sa prejaviť.	1	1	1	1	0.933	0.05	0	0	0	0.933	1	1	1	0.8	0.17	0	0	0	-0.067	0	0	0	-0.133	0.12	0	0	0	B
138	15	d138s15	I never imagined then that I would ever feel bitter about England again.	Nikdy som si vtedy predstaviť, že by som niekedy pocit horkosti Anglicku znova.	Nikdy som si vtedy nevedel predstaviť, že by som niekedy znova mal pocit horkosti k Anglicku.	Nikdy som si nepredstavoval, že by som voči Anglicku opäť pociťoval zatrpknutosť.	0.5	0.583	0.583	0.583	0.583	0.53	0.33	0.18	0	0.75	0.833	0.833	0.833	0.583	0.43	0.26	0.14	0	0.25	0.25	0.25	0.25	0	-0.1	-0.07	-0.04	0	B
138	16	d138s16	But I do feel bitter now, because England has done a very bad day’s work for Ireland.	Ale ja sa cítim horkosť teraz, pretože Anglicko odviedol veľmi zlý deň v práci pre Írsko.	Ale ja cítim horkosť teraz, pretože Anglicko odvielol veľmi zlý deň v práci pre Írsko.	Teraz však tú zatrpknutosť cítim, pretože Anglicko dostalo Írsko do zlej situácie	0.917	1	1	1	0.75	0.31	0.06	0	0	0.833	1	1	1	0.75	0.33	0.07	0	0	-0.084	0	0	0	0	0.02	0.01	0	0	B
138	17	d138s17	It is dragging Irish history along in its triumphal wake, like tin cans tied to a wedding car.	Je ťahaním írskej histórii spolu vo svojom víťaznom ťažení brázde, ako plechovky viazaných na svadobné autá.	Je ťahaním írskej histórii spolu vo svojom víťaznom ťažení brázde, ako plechovky viazané na svadobné autá.	a triumfálne za sebou ťahá írsku históriu ako plechovky priviazané k svadobnému autu.	1	1	1	1	0.846	0.12	0.06	0	0	1	1	1	1	0.846	0.12	0.06	0	0	0	0	0	0	0	0	0	0	0	B
138	18	d138s18	All but a few diehards had learned to live with the partition of the island of Ireland.	Všetci ale niekoľko spiatočníkov naučil žiť s rozdelenie ostrova Írska.	Všetci až na niekoľko spiatočníkov sa naučili žiť s rozdelenie ostrova Írska.	Až na pár konzervatívcov sa všetci bez problémov naučili žiť na rozdelenom Írskom ostrove.	0.857	0.929	0.929	0.929	0.857	0.14	0	0	0	0.5	0.714	0.714	0.714	0.714	0.42	0.15	0	0	-0.357	-0.215	-0.215	-0.215	-0.143	0.28	0.15	0	0	B
138	19	d138s19	Why?	Prečo?	Prečo?	Prečo je to tak?	0.75	0.75	0.75	0.75	0.75	0.25	0	0	0	0.75	0.75	0.75	0.75	0.75	0.25	0	0	0	0	0	0	0	0	0	0	0	0	B
138	20	d138s20	Because the border between Northern Ireland and the Republic had become so soft as to be barely noticeable.	Pretože hranice medzi Severným Írskom a ČR sa stala tak mäkké, aby boli sotva znateľné.	Pretože hranice medzi Severným Írskom a republikou sa stala tak mäkkou, až je sotva znateľná.	Pretože hranica medzi Severným Írskom a Republikou sa stala tak bezproblémovou, že si ju takmer nevšimneme.	0.5	0.5	0.5	0.5	0.5	0.5	0.33	0.21	0.07	0.438	0.438	0.438	0.438	0.438	0.56	0.46	0.43	0.39	-0.062	-0.062	-0.062	-0.062	-0.062	0.06	0.13	0.22	0.32	B
138	21	d138s21	If you crossed it, you had to change currencies, and if you were driving you had to remember that the speed limits were changing from kilometres per hour to miles.	Pokiaľ ju prekročil, museli meniť meny, a ak ste išli ste mali mať na pamäti, že obmedzenie rýchlosti sa menili od kilometrov za hodinu na míle.	Pokiaľ ju prekročil, museli meniť meny, a ak ste išli ste mali mať na pamäti, že obmedzenie rýchlosti sa menili od kilometrov za hodinu na míle.	Ak ste ju prekročili, museli ste zmeniť menu a ak ste šoférovali, museli ste mať na pamäti, že rýchlosť sa zmení z kilometrov za hodinu na míle,	0.259	0.481	0.481	0.481	0.444	0.59	0.34	0.24	0.12	0.259	0.481	0.481	0.481	0.444	0.59	0.34	0.24	0.12	0	0	0	0	0	0	0	0	0	B
138	22	d138s22	But these are just banal details.	Ale to sú len banálne detaily.	Ale to sú len banálne detaily.	no tieto rozdiely sú len banalitou	0.667	0.833	0.833	0.833	0.667	0.33	0.2	0	0	0.667	0.833	0.833	0.833	0.667	0.33	0.2	0	0	0	0	0	0	0	0	0	0	0	B
138	23	d138s23	They do not impinge on the simple, ordinary experience of people sharing an island without having to be deeply conscious of division.	Oni nezasahujú do jednoduchého, bežné skúsenosti ľudí zdieľajúcich ostrov, bez toho aby museli byť hlboko vedomí divízie.	Oni nezasahujú do jednoduchých, bežných skúsenosti ľudí zdieľajúcich ostrov, bez toho aby museli byť hlboko vedomí divízie.	a nezasahujú do jednoduchých a bežných skúseností ľudí, ktorí sa delia o ostrov bez toho, aby si túto hranicu uvedomovali.	0.65	0.7	0.7	0.7	0.65	0.35	0.21	0.11	0.06	0.55	0.6	0.6	0.6	0.55	0.44	0.26	0.17	0.06	-0.1	-0.1	-0.1	-0.1	-0.1	0.09	0.05	0.06	0	B
138	24	d138s24	Zdroj: https://www.theguardian.com/commentisfree/2016/jun/24/northern-irish-peace-sacrificed-english-nationalism	Zdroj: https://www.theguardian.com/commentisfree/2016/jun/24/northern-irish-peace-sacrificed-english-nationalism	Zdroj: https://www.theguardian.com/commentisfree/2016/jun/24/northern-irish-peace-sacrificed-english-nationalism	Source: https://www.theguardian.com/commentisfree/2016/jun/24/northern-irish-peace-sacrificed-english-nationalism	0.5	0.5	0.5	0.5	0	0.5	0	0	0	0.5	0.5	0.5	0.5	0	0.5	0	0	0	0	0	0	0	0	0	0	0	0	B
139	1	d139s1	Beauty: selfie powders that flatter on and off camera	Krása: chrličmi prášky, ktoré plochejšie zapnutie a vypnutie fotoaparátu	Krása: selfie púdre, ktoré pomáhajú fotoaparátu	Krása: selfie púdre, ktoré lichotia foťáku	1	1	1	1	0.833	0.22	0	0	0	0.333	0.333	0.333	0.333	0.333	0.66	0.6	0.5	0.33	-0.667	-0.667	-0.667	-0.667	-0.5	0.44	0.6	0.5	0.33	B
139	2	d139s2	Many of social media’s favourite makeup looks, while striking and flawless in photographs, look pretty bad in real life	Mnoho z obľúbeného make-upu sociálnych médií vyzerá, zatiaľ čo štrajkujúci a bezchybné na fotografiách, vyzerajú dosť zlý v reálnom živote	Mnoho z obľúbených make-upov v médiách vyzerá bezchybne na fotografiách, ale vyzerá dosť zle v reálnom živote	Mnohé púdre, ktoré sú obľúbené v médiách a vyzerajú bezchybne na fotografiách, pôsobia naozaj zle v reálnom živote.	0.722	0.889	0.889	0.889	0.722	0.3	0.1	0	0	0.556	0.611	0.611	0.611	0.556	0.44	0.29	0.12	0	-0.166	-0.278	-0.278	-0.278	-0.166	0.14	0.19	0.12	0	B
139	3	d139s3	I approach any beauty product designed and declared as an aid to good selfies with some scepticism.	Aj priblížiť k žiadnemu kozmetický výrobok určený a deklarovaná ako pomôcka k dobrým selfie s nejakým skepticizmom.	Ku kozmetickým výrobkom určeným ako pomôcky k dobrým selfie pristupujem skepticky.	Ku kozmetickým výrobkom, ktoré sú navrhnuté ako pomôcky pre vydarené selfie, pristupujem skepticky.	1	1	1	1	1	0.05	0	0	0	0.538	0.538	0.538	0.538	0.538	0.46	0.25	0	0	-0.462	-0.462	-0.462	-0.462	-0.462	0.41	0.25	0	0	B
139	4	d139s4	Not because I’ve anything against selfie culture within reason, but because many of social media’s favourite makeup looks, while striking and flawless in photographs, look pretty bad in real life.	Nie preto, že som niečo proti selfie kultúry v rozumných medziach, ale preto, že mnohí z obľúbeného make-upu sociálnych médií vyzerá, zatiaľ čo štrajkujúci a bezchybné na fotografiách, vyzerajú dosť zlý v reálnom živote.	Nie preto, že som proti selfie kultúre v rozumných medziach, ale preto, že mnoho obľúbených make-upov médií vyzerá dosť zle v reálnom živote, zatiaľ čo sú bezchybné na fotografiách.	Nie je to preto, že by som mala bezdôvodne niečo proti „kultúre selfie“, ale preto, že mnohé púdre, ktoré sú obľúbené v médiách a vyzerajú bezchybne na fotografiách, pôsobia naozaj zle v reálnom živote.	0.5	0.735	0.735	0.735	0.618	0.5	0.21	0.06	0	0.529	0.794	0.794	0.794	0.676	0.47	0.21	0.09	0.03	0.029	0.059	0.059	0.059	0.058	-0.03	0	0.03	0.03	B
139	5	d139s5	Away from filters and flashlights, sharp brows look harsh, heavy contouring robs the skin of its natural texture and signs of vitality, and “baking” (powder daubed heavily under eyes and left for several minutes to stick and provide maximum coverage) appears dry, caked and exacerbates any lines as the day wears on.	Ďaleko od filtrov a baterky, ostré obočie vyzerajú drsne, ťažký tvarovanie okráda koži jej prirodzenú štruktúru a známky vitality a "pečenie" (prášok zatierali silne pod očami a odišiel na niekoľko minút, aby sa držať a poskytujú maximálne pokrytie) sa objaví suchý, upečený a zhoršuje všetky riadky ako deň nosia ďalej.	Bez filtrov a blesku, ostré obočie vyzerá drsne, kontúrovanie okráda kožu o jej prirodzenú štruktúru a známky vitality a "pečenie" (púder zatieraný silne pod oči a nechaný tak niekoľko minút, aby sa držal a poskytoval maximálne krytie) sa javí byť suchý, stvrdnutý a zhoršuje linky, ktoré by počas dňa vznikli.	Bez použitia filtrov a bleskov, ostré hrany obočia vyzerajú kruto, výrazné kontúrovanie ochudobňuje pleť o jej prirodzenú textúru a známky vitality a hrubá vrstva mejkapu, ktorá sa necháva zaschnúť pod očami a poskytuje maximálne krytie pôsobí sucho, stvrdnuto a nedovoľuje preniknúť akýmkoľvek nedokonalostiam, ktoré by pod okom vznikli počas dňa.	0.66	0.82	0.82	0.82	0.72	0.36	0.14	0.06	0.02	0.52	0.74	0.74	0.74	0.64	0.5	0.18	0.06	0.02	-0.14	-0.08	-0.08	-0.08	-0.08	0.14	0.04	0	0	B
139	6	d139s6	But several new “selfie powders”, all promising to flatter photographed skin with clever use of colour filters and light-reflecting particles, were sufficiently intriguing.	Ale niekoľko nových "chrličmi prášky", to všetko sľubuje, že plochejšie nadobudnutého pokožku šikovnému využitie farebných filtrov a ľahkých-odrážajúce častice boli dostatočne zaujímavé.	Ale niekoľko nových "selfie púdrov" sľubuje, že vylepší pokožku šikovným využitím farebných filtrov a ľahkých odrážajúcich častíc, ktoré sú dostatočne zaujímavé.	Ale niekoľko nových „selfie púdrov“, ktoré sľubujú dokonalý vzhľad na fotografiách pri použití farebných filtrov a prvkov, ktoré odrážajú svetlo, je naozaj zvláštnych.	0.739	0.783	0.783	0.783	0.783	0.26	0.18	0.09	0	0.652	0.739	0.739	0.739	0.739	0.3	0.18	0.09	0	-0.087	-0.044	-0.044	-0.044	-0.044	0.04	0	0	0	B
139	7	d139s7	Estée Edit’s Flash Photo Powder (L24) is a baby-blue, micro-fine finishing powder designed to brighten and enliven the face, while blurring lines.	Estee Edit je Flash Photo Powder (L 24) je baby-blue, mikro-jemný prášok úprava navrhnutá tak, aby prejasnenie a oživiť tvár, zatiaľ čo rozmazanie linky.	Estee Edit je Flash Photo Powder (L 24) je bábätkovo modrý, mikro-jemný púder, navrhnutý tak, aby rozjasnil a oživil tvár, zatiaľ čo rozmaže linky.	Púder Estée Edit’s Flash Photo Powder (L24) je bábätkovsky modrý púder obsahujúci mikro častice navrhnutý tak, aby rozžiaril a oživil pleť a zakryl vrásky.	0.625	0.75	0.75	0.75	0.708	0.37	0.17	0.04	0	0.417	0.625	0.625	0.625	0.583	0.54	0.26	0.09	0	-0.208	-0.125	-0.125	-0.125	-0.125	0.17	0.09	0.05	0	B
139	8	d139s8	And it works remarkably well.	A funguje to pozoruhodne dobre.	A funguje to pozoruhodne dobre.	A funguje to naozaj pozoruhodne.	0.2	0.4	0.4	0.4	0.4	0.8	0.5	0.33	0	0.2	0.4	0.4	0.4	0.4	0.8	0.5	0.33	0	0	0	0	0	0	0	0	0	0	B
139	9	d139s9	My under-eyes were subtly, but visibly, perkier, minus the big-box washing powder cast I was expecting to be left on my skin.	Moje nedostatočne oči jemne, ale viditeľne, perkier, mínus big-box prací prášok obsadenie som očakával, aby bola ponechaná na mojej koži.	Okolie pod očami som mala viditeľne jemnejšie a živšie, avšak mala som pocit, že na tvári mám celú krabicu prášku na pranie.	Okolie pod očami som mala viditeľne jemnejšie a živšie, avšak mala som pocit, že na tvári mám celú krabicu prášku na pranie.	0.773	0.955	0.955	0.955	0.909	0.13	0	0	0	0	0	0	0	0	1	1	1	1	-0.773	-0.955	-0.955	-0.955	-0.909	0.87	1	1	1	B
139	10	d139s10	It’s ostensibly for “all skins”, but I’d think twice about dusting it over brown or black complexions, which would do much better with Becca’s new Soft Blurring Powder (L32), a golden tone product (too dark for me.	Je to zdanlivo pre "všetky skiny", ale ja by som dvakrát premýšľať o tom, oprašovanie ju cez hnedej alebo čiernej pleti, ktoré by urobiť oveľa lepšie s Becca novej Soft rozmazanie prášok (32 L), zlatý tón produktu (príliš tmavý pre mňa.	Je zdanlivo pre "všetky pleti", ale ja by som dvakrát premýšľala o tom, či ho dám na hnedú alebo čiernu pleť, ktorej by urobil oveľa lepšie nový Becca Soft Blurring Powder (32 L), zlatý tón produktu (príliš tmavý pre mňa.	Púder je údajne pre „všetky typy pleti“, ale dvakrát by som si rozmyslela, či by som ho naniesla aj na tmavšiu pokožku, pre ktorú by bol vhodnejší Beccin púder Soft Blurring Powder (L32) výrobok zlatistej farby (pre mňa príliš tmavý,	0.625	0.875	0.875	0.875	0.8	0.31	0.07	0	0	0.475	0.75	0.75	0.75	0.725	0.45	0.15	0.05	0.02	-0.15	-0.125	-0.125	-0.125	-0.075	0.14	0.08	0.05	0.02	B
139	11	d139s11	Palefaces, avoid) that does the same thing, albeit less conveniently than a compact.	Palefaces, vyhnúť), ktorá robí to isté, aj keď menej pohodlne ako kompaktu.	bledšie tváre by sa mu mali vyhnúť), ktorý robí to isté, aj keď menej pohodlne ako kompaktný púder.	bledšie tváre by sa mu mali vyhýbať), ktorý má rovnaký účinok, avšak nie až taký dobrý ako púdrenka.	0.944	0.944	0.944	0.944	0.889	0.05	0	0	0	0.556	0.611	0.611	0.611	0.611	0.44	0.29	0.25	0.2	-0.388	-0.333	-0.333	-0.333	-0.278	0.39	0.29	0.25	0.2	B
139	12	d139s12	It gives a pretty, almost ethereal glow to any skin upwards of beige and, to my eye, a little more coverage than the Estée Edit, which, I should mention, has been mimicked pretty shamelessly by W7 with its new Selfie Powder (L6.95).	To dáva pekný, takmer éterickú žiaru na akékoľvek kože smerom nahor béžovej ak môjmu oku, trochu väčšie pokrytie ako Estée Edit, ktorý by som mal spomenúť, bol napodobnil celkom nehanebne podľa W7 so svojím novým selfie prášku (6,95 L ).	Dáva peknú, takmer éterickú žiaru akejkoľvek koži, od béžovej, podľa mňa, trochu lepšie pokrytie ako Estée Edit, ktorý by som mala spomenúť, bol napodobnený celkom nehanebne novým púdrom W7 s jeho Selfie Powder (6,95 L ).	Typy pleti s odtieňom tmavším ako béžová budú krásne a budú takmer étericky žiariť. Podľa mňa kryje lepšie ako Estée Edit, ktorú úplne nehanebne napodobnila W7 so svojím selfie púdrom (L6,95).	0.903	1	1	1	0.774	0.27	0.1	0.05	0	0.71	1	1	1	0.774	0.36	0.08	0.02	0	-0.193	0	0	0	0	0.09	-0.02	-0.03	0	B
139	13	d139s13	It’s not as good, but worth trying if you’re merely curious.	Nie je to tak dobré, ale stojí za vyskúšanie, ak ste len zvedaví.	Nie je to také dobré, ale stojí za vyskúšanie, ak ste len zvedaví.	Nie je taký dobrý, ale oplatí sa ho vyskúšať, ak ste zvedaví.	0.583	0.667	0.667	0.667	0.667	0.46	0.16	0	0	0.583	0.667	0.667	0.667	0.667	0.46	0.16	0	0	0	0	0	0	0	0	0	0	0	B
140	1	d140s1	Star of postwar German cinema was Soviet spy, declassified files show	Hviezda povojnového nemeckého filmu bol sovietsky špión, odtajnené súbory zobraziť	Tajné záznamy ukázali, že hviezda povojnového nemeckého filmu bola sovietskou špiónkou	Tajné záznamy odhalili, že hviezda povojnovej nemeckej kinematografie bola sovietskou špiónkou	0.909	1	1	1	0.909	0.09	0	0	0	0.364	0.364	0.364	0.364	0.364	0.63	0.4	0.11	0	-0.545	-0.636	-0.636	-0.636	-0.545	0.54	0.4	0.11	0	B
140	2	d140s2	One of Germany’s best-loved postwar actors has been exposed as a Soviet agent following the declassification of top secret intelligence documents.	Jeden z najobľúbenejších hercov povojnových nemeckých bola vystavená ako sovietsky agent po odtajnení tajných spravodajských dokumentov.	Jedena z najobľúbenejších herečiek povojnového Nemecka bola označená za sovietsku agentku po odhalení tajných dokumentov.	Odhalili jednu z najobľúbenejších herečiek povojnového Nemecka. Po odtajnení dokumentov sa ukázalo, že bola sovietskou špiónkou.	0.625	0.938	0.938	0.938	0.75	0.37	0.13	0	0	0.5	0.688	0.688	0.688	0.625	0.5	0.26	0.21	0.15	-0.125	-0.25	-0.25	-0.25	-0.125	0.13	0.13	0.21	0.15	B
140	3	d140s3	Marika Rökk, who was banned from acting for two years for her apparent closeness to the Nazi regime, had in fact been working from the 1940s onwards for a reconnaissance network passing Third Reich secrets to Moscow.	Marika Rokk, ktorý bol zakázaný od hrania po dobu dvoch rokov pre jej zjavnú blízkosť k nacistickému režimu, mal v skutočnosti pracuje od roku 1940 a ďalej na prieskumnú sieť prechádzajúcej Tretej ríše tajomstvo do Moskvy.	Marika Rökková, ktorá dostala zákaz hrania po dobu dvoch rokov pre jej zjavnú blízkosť k nacistickému režimu, pracovala v skutočnosti od roku 1940 pre sovietsku informačnú jednotku a posúvala tajomstvá tretej ríše priamo do Moskvy.	Marika Rökková, ktorá dostala zákaz hrania na dva roky v dôsledku zdanlivej priazni k nacistickému režimu, pracovala v skutočnosti od roku 1940 pre sovietsku informačnú jednotku a posúvala tajomstvá tretej ríše priamo do Moskvy.	0.529	0.676	0.676	0.676	0.676	0.5	0.2	0.05	0	0.206	0.235	0.235	0.235	0.235	0.8	0.73	0.69	0.65	-0.323	-0.441	-0.441	-0.441	-0.441	0.3	0.53	0.64	0.65	B
140	4	d140s4	Rökk was born in Cairo in 1913 to Hungarian parents and spent her childhood in Budapest.	Rokk sa narodil v Káhire v roku 1913 maďarským rodičom a strávil svoje detstvo v Budapešti.	Rökková sa narodila v Káhire v roku 1913 maďarským rodičom a svoje detstvo strávila v Budapešti.	Rökková sa narodila v roku 1913 v Káhire maďarským rodičom a detstvo strávila v Budapešti.	0.267	0.6	0.6	0.6	0.4	0.75	0.4	0.14	0	0.067	0.333	0.333	0.333	0.267	0.93	0.73	0.42	0.15	-0.2	-0.267	-0.267	-0.267	-0.133	0.18	0.33	0.28	0.15	B
140	5	d140s5	Her career began during the Nazi era as an operetta star, and she went on toperform in almost 40 films before her death aged 90 in 2004.	Jej kariéra začala počas nacistickej éry ako operetné hviezdy, a ona pokračovala na vykonanie v takmer 40 filmoch pred jej smrti vo veku 90 v roku 2004.	Jej kariéru začínala ako operná diva počas nacistickej éry a pokračovala hraním v takmer 40 filmoch pred jej smrťou v roku 2004 vo veku 90.	Kariérnu cestu začínala ako operná diva za éry nacizmu a pokračovala ako herečka, pričom do smrti v roku 2004 vo veku 90 rokov účinkovala v takmer 40 filmoch.	0.429	0.857	0.857	0.857	0.679	0.53	0.25	0.15	0.04	0.357	0.679	0.679	0.679	0.5	0.6	0.44	0.31	0.2	-0.072	-0.178	-0.178	-0.178	-0.179	0.07	0.19	0.16	0.16	B
140	6	d140s6	It is believed she was recruited as a KGB agent by her manager, Heinz Hoffmeister, who was already working for Soviet intelligence.	Predpokladá sa, že bol prijatý ako agent KGB jej manažérom, Heinz Hoffmeistera, ktorý už pracoval pre sovietsku inteligenciou.	Predpokladá sa, že do KGB bola prijatá jej manažérom, Heinzom Hoffmeisterom, ktorý už pracoval pre sovietsku tajnú službu.	Panuje presvedčenie, že do KGB ju priviedol jej manažér Heinz Hoffmeister, ktorý v tom čase pracoval pre sovietsku tajnú službu.	0.6	0.7	0.7	0.7	0.6	0.4	0.1	0.05	0	0.5	0.5	0.5	0.5	0.45	0.5	0.31	0.22	0.12	-0.1	-0.2	-0.2	-0.2	-0.15	0.1	0.21	0.17	0.12	B
140	7	d140s7	What Rökk’s role was, and specifically what information she might have passed on to Moscow, remains unclear.	Akú úlohu Rokk bol, a to konkrétne, aké informácie jej mohli preniesť na Moskve, zostáva nejasné.	Akú úlohu mala Rökková a to, aké informácie konkrétne posunula do Moskvy, zostáva nejasné.	Čo bolo Rökkovej úlohou, a aké informácie poskytla Moskve, zatiaľ zostáva nejasné.	0.833	0.917	0.917	0.917	0.583	0.37	0.13	0	0	0.75	0.75	0.75	0.75	0.667	0.35	0.15	0	0	-0.083	-0.167	-0.167	-0.167	0.084	-0.02	0.02	0	0	B
140	8	d140s8	Her husband, the film director Georg Jacoby, is thought to have spied alongside her.	Jej manžel, filmový režisér Georg Jacoby, je myšlienka k uvidel vedľa nej.	Jej manžel, filmový režisér Georg Jacoby, bol vraj tiež špión.	Mnohí sa domnievajú, že špiónom bol aj jej manžel, režisér Georg Jacoby.	0.583	1	1	1	0.75	0.41	0.27	0.1	0	0.5	1	1	1	0.75	0.5	0.27	0.1	0	-0.083	0	0	0	0	0.09	0	0	0	B
140	9	d140s9	Krona, the network of agents she was a member of, was responsible for passing on high-class military intelligence, including plans for Operation Barbarossa and the Battle of Kursk.	Krona, sieť agentov bola členom, bol zodpovedný za odovzdávanie prvotriedne vojenskej spravodajskej služby, vrátane plánov pre operácie Barbarossa a bitky pri Kursku.	Krona, sieť agentov, ktorej členom bola Rökková, bola zodpovedná za odovzdávanie dôležitých informácií najvyššej vojenskej tajnej službe, vrátane plánov operácie Barbarossa a bitky pri Kursku.	Krona, sieť agentov, ktorej členkou bola aj Rökková, poskytovala dôležité informácie, ako napríklad plány operácie Barbarossa alebo bitky pri Kursku, priamo najvyšším vojenským tajným službám.	0.64	0.76	0.76	0.76	0.68	0.36	0.2	0.08	0	0.56	0.8	0.8	0.8	0.6	0.48	0.25	0.13	0.04	-0.08	0.04	0.04	0.04	-0.08	0.12	0.05	0.05	0.04	B
140	10	d140s10	The network was led by the legendary Soviet agent Yan Chernyak, nicknamed the “man without a shadow” for his ability to move around undetected.	Sieť viedol legendárny sovietsky agent Yan Chernyak, přezdíval "muž bez tieňa" pre jeho schopnosť pohybovať nepozorovane.	Sieť viedol legendárny sovietsky agent Yan Chernyak, prezývaný ako "muž bez tieňa" pre jeho schopnosť pohybovať sa nepozorovane.	Táto sieť bola pod vedením legendárneho sovietskeho agenta Yana Chernyaka, prezývaného aj "muž bez tieňa" pre jeho schopnosť pohybovať sa bez povšimnutia.	0.591	0.636	0.636	0.636	0.636	0.36	0.29	0.25	0.22	0.545	0.591	0.591	0.591	0.591	0.4	0.33	0.3	0.27	-0.046	-0.045	-0.045	-0.045	-0.045	0.04	0.04	0.05	0.05	B
140	11	d140s11	Chernyak himself was recruited by Soviet military reconnaissance while studying in Berlin in the 1940s.	Chernyak sám bol regrutovanie sovietskej vojenskej prieskum pri štúdiu v Berlíne v roku 1940.	Sám Chernyak bol prijatý do sovietskej vojenskej tajnej služby počas štúdia v Berlíne v roku 1940.	Chernyaka povolala Sovietska informačná jednotka počas štúdií v Berlíne v roku 1940.	0.75	0.75	0.75	0.75	0.583	0.35	0.3	0.25	0.18	0.833	0.833	0.833	0.833	0.5	0.37	0.26	0.21	0.15	0.083	0.083	0.083	0.083	-0.083	0.02	-0.04	-0.04	-0.03	B
140	12	d140s12	His network of around 35 agents included bankers, military officials and secretaries, as well as the actor Olga Chekhova.	Jeho sieť s dĺžkou približne 35 agentov zahŕňali bankára, vojenské úradníkmi a sekretárky, rovnako ako herec Olga Chekhov.	Jeho sieť s približne 35 agentmi zahŕňala bankárov, vojenských úradníkov a sekretárov, rovnako ako herečku Olgu Chekhovú.	Chernyakova sieť pozostávala z približne 35 agentov vrátane bankárov, vojenských úradníkov, tajomníkov a členkou bola tiež herečka Olga Chekhova.	0.684	0.684	0.684	0.684	0.632	0.31	0.11	0.05	0	0.632	0.632	0.632	0.632	0.579	0.36	0.16	0.05	0	-0.052	-0.052	-0.052	-0.052	-0.053	0.05	0.05	0	0	B
140	13	d140s13	Rökk’s role as a Soviet spy was uncovered by Gehlen, the West German organisation which preceded Germany’s current domestic intelligence agency, the BND, and first made a formal note of its suspicions in its records in November 1951.	Úloha Rokk ako sovietskeho špióna bol odkrytý Gehlen, západonemeckého organizáciu, ktorá predchádzala nemeckej aktuálnej domácej rozviedky BND, a prvý urobil vedomia svojich podozrenia vo svojej evidencii v novembri 1951.	Úlohu Rökkovej ako sovietskej špiónky odhalila západonemecká organizácia Gehlen, ktorá predchádzala súčasnej nemeckej domácej tajnej službe BND a ktorá mala ako prvá podozrenie už v novembri roku 1951, ktoré formálne zaznamenala vo svojich spisoch.	Rökkovej špionážna rola bola odhalená organizáciou Gehlen. Išlo o západonemeckú organizáciu, ktorá predchádzala súčasným nemeckým tajným službám, a ktorá mala ako prvá podozrenie už v novembri roku 1951, ktoré formálne zaznamenala vo svojich spisoch.	0.647	0.882	0.882	0.882	0.824	0.32	0.09	0.03	0	0.382	0.5	0.5	0.5	0.441	0.64	0.51	0.46	0.45	-0.265	-0.382	-0.382	-0.382	-0.383	0.32	0.42	0.43	0.45	B
140	14	d140s14	In a file published by the tabloid Bild that had been classified top secret for 50 years, but which has just been released, Rökk’s “connections to Russian intelligence posts” – as Bild put it – are laid bare.	V súbore zverejnenej bulvárny Bild, ktorý bol klasifikovaný prísne tajné po dobu 50 rokov, ale ktorý bol práve prepustený, Rokk je "napojenie na ruských spravodajských príspevkov" - ako to Bild povedané - sú obnažená.	Záznam zverejnený bulvárnym časopisom Bild, ktorý bol klasifikovaný ako prísne tajný po dobu 50 rokov, ale bol nedávno zverejnený, obsahuje jasné dôkazy o Rökkovej "prepojení s ruskou tajnou službou".	Časopis Bild zverejnil viac než 50 rokov prísne tajný spis, ktorý obsahuje jasné dôkazy o Rökkovej "prepojení s ruskou tajnou službou".	1	1	1	1	0.905	0.2	0.03	0	0	0.619	0.762	0.762	0.762	0.429	0.55	0.39	0.29	0.26	-0.381	-0.238	-0.238	-0.238	-0.476	0.35	0.36	0.29	0.26	B
140	15	d140s15	Advertisement	Reklama	Reklama	Reklama	0	0	0	0	0	1	0	0	0	0	0	0	0	0	1	0	0	0	0	0	0	0	0	0	0	0	0	B
140	16	d140s16	In 1951 Rökk announced she was giving up her acting career after 16 years.	V roku 1951 Rokk oznámila, že sa vzdáva svoju hereckú kariéru po 16 rokoch.	V roku 1951 Rökková oznámila, že sa po 16 rokoch vzdáva svojej hereckej kariéry.	V roku 1951 Rökková oznámila, že sa po 16 rokoch vzdáva svojej hereckej kariéry.	0.286	0.571	0.571	0.571	0.429	0.71	0.46	0.25	0	0.071	0.071	0.071	0.071	0.071	0.93	0.85	0.76	0.66	-0.215	-0.5	-0.5	-0.5	-0.358	0.22	0.39	0.51	0.66	B
140	17	d140s17	Newspapers at the time said that she wanted to devote herself to running a boutique selling authentic Swiss woollenware in Düsseldorf.	Noviny v tom čase povedal, že sa chce venovať sama na prevádzkovanie butiku predávajú autentickej švajčiarskej woollenware v Düsseldorfe.	Noviny v tom čase tvrdili, že sa chce venovať prevádzkovaniu butiku a predávať autentické švajčiarske vlnené výrobky v Düsseldorfe.	Vtedajšia denná tlač tvrdila, že si chce v Düsseldorfe založiť butik s autentickými švajčiarskymi vlnenými výrobkami.	0.938	1	1	1	0.813	0.26	0.05	0	0	0.938	1	1	1	0.813	0.26	0.05	0	0	0	0	0	0	0	0	0	0	0	B
140	18	d140s18	But west German intelligence concluded the plan was a “clever chess-move cover” allowing her to continue to spy for the Soviets.	Ale západnej Nemecká spravodajská dospel k záveru, plán bol "šikovný šachový ťah-cover" ktorá jej umožnila pokračovať k špionáži pre Sovietov.	Ale západonemecká tajná služba dospel k záveru, že bol jej plán "šikovný šachový krycí manéver", ktorý jej umožnil pokračovať v špionáži pre Sovietov.	Západonemecká tajná služba z toho však vyvodila, že ide len o plán, ako pokračovať v špionáži pre Sovietov.	0.833	0.889	0.889	0.889	0.722	0.25	0.1	0.05	0	0.722	0.833	0.833	0.833	0.556	0.43	0.27	0.19	0.1	-0.111	-0.056	-0.056	-0.056	-0.166	0.18	0.17	0.14	0.1	B
140	19	d140s19	Rökk was groomed by the Nazi regime to offer the Third Reich public homegrown acting talent to compete with the likes of Hollywood stars Ginger Rogers and Rita Hayworth.	Rokk bol upravený nacistickým režimom ponúknuť Tretej ríše verejnej homegrown herecký talent súťažiť s podobnými hollywoodskych hviezd Ginger Rogers a Rita Hayworth.	Nacisti sa o Rökkovú príkladne starali. Predstavovala totiž pre nich tamojší herecký talent, ktorý mohol konkurovať hollywoodskym hviezdam, ako napríklad Ginger Rogersová alebo Rita Hayworthová.	Nacisti sa o Rökkovú príkladne starali. Predstavovala totiž pre nich tamojší herecký talent, ktorý mohol konkurovať hollywoodskym hviezdam, ako napríklad Ginger Rogersovej alebo Rite Hayworthovej.	0.92	0.92	0.92	0.92	0.88	0.08	0	0	0	0.12	0.12	0.12	0.12	0.12	0.88	0.83	0.82	0.81	-0.8	-0.8	-0.8	-0.8	-0.76	0.8	0.83	0.82	0.81	B
140	20	d140s20	She was considered to be one of Hitler’s favourite actors and is reported to have had an affair with his propaganda minister, Joseph Goebbels.	Ona bola považovaná za jeden z Hitlerových obľúbených hercov a údajne mal pomer s jeho propagandistického ministra, Joseph Goebbels.	Bola považovaná za jednu z Hitlerových obľúbených herečiek a údajne mala pomer s jeho propagandistickým ministrom, Josephom Goebbelsom.	Bola tiež Hitlerovou obľúbenkyňou a údajne mala pomer s ministrom jeho propagandy, Josephom Goebbelsom.	0.929	1	1	1	0.714	0.31	0.11	0	0	0.571	0.714	0.714	0.714	0.5	0.55	0.29	0.18	0.13	-0.358	-0.286	-0.286	-0.286	-0.214	0.24	0.18	0.18	0.13	B
140	21	d140s21	She shot to fame in 1935 after starring in Leichte Kavallerie (Light Cavalry), becoming one of the most prolific stars of her time.	Natočila ku sláve v roku 1935 po tom, čo hral v Leichte Kavallerie (ľahká jazda), sa stal jedným z najplodnejších hviezdami svojej doby.	Za vrchol jej kariéry je považované natáčanie filmu Leichte Kavallerie (Ľahká kavaléria) v roku 1935, kde stvárnila hlavnú postavu. Vďaka tejto role sa Rökková stala jednou z najväčších hviezd svojej doby.	Za vrchol jej kariéry sa považuje natočenie filmu Leichte Kavallerie (Ľahká kavaléria) v roku 1935, kde stvárnila hlavnú postavu. Vďaka tejto role sa Rökková stala jednou z najväčších hviezd svojej doby.	0.645	0.839	0.839	0.839	0.742	0.35	0.16	0.07	0	0.065	0.097	0.097	0.097	0.097	0.9	0.86	0.82	0.78	-0.58	-0.742	-0.742	-0.742	-0.645	0.55	0.7	0.75	0.78	B
140	22	d140s22	She often starred alongside Johannes Heesters in propaganda films, and was said to bring a degree of exoticism to her roles with a light Hungarian accent.	Často hral pozdĺž Johannes Heesters v propagandistických filmov, a bol povedal, aby priniesť určitý stupeň exotiky do jej rola s ľahkým maďarským prízvukom.	Často hrala s Johannesom Heestersom v propagandistických filmov a vraj so svojim miernym maďarským prízvukom dokázala do role priniesť určitý stupeň exotiky.	Často hrávala po boku Johannesa Heestersa v propagandistických filmoch. Mnohí tvrdili, že vďaka svojmu maďarskému akcentu dokázala do filmu vniesť určitý stupeň exotiky.	0.696	0.87	0.87	0.87	0.783	0.3	0.13	0.04	0	0.652	0.652	0.652	0.652	0.652	0.34	0.18	0.04	0	-0.044	-0.218	-0.218	-0.218	-0.131	0.04	0.05	0	0	B
140	23	d140s23	It is not known if Rökk ever knew she was under suspicion for espionage.	Nie je známe, či Rokk vôbec vedela, že je v podozrení pre špionáž.	Nie je známe, či Rökková vôbec vedela, že je podozrievaná zo špionáže.	Nie je známe, či si bola Rökková vedomá podozrení zo špionážnej činnosti.	0.667	0.75	0.75	0.75	0.667	0.46	0.25	0.18	0.1	0.5	0.667	0.667	0.667	0.583	0.58	0.27	0.2	0.11	-0.167	-0.083	-0.083	-0.083	-0.084	0.12	0.02	0.02	0.01	B
140	24	d140s24	Neither is it known whether any attempts were made to prevent her from continuing.	Ani sa to známe, či boli všetky pokusy, aby nemohla pokračovať.	Nie je tiež známe, či sa pokúsili zabrániť jej kariére.	Nie je tiež známe, či boli podniknuté kroky, ktoré by jej zabránili v činnosti pokračovať.	0.733	0.733	0.733	0.733	0.667	0.26	0.14	0.08	0	0.6	0.6	0.6	0.6	0.6	0.4	0.29	0.25	0.19	-0.133	-0.133	-0.133	-0.133	-0.067	0.14	0.15	0.17	0.19	B
140	25	d140s25	She was for years considered to have been anti-communist.	Bola celé roky považovaný za anti-komunista.	Celé roky bola považovaná za odporkyňu komunizmu.	Dlhé roky ju považovali za odporkyňu komunizmu.	0.714	0.857	0.857	0.857	0.714	0.28	0	0	0	0.429	0.429	0.429	0.429	0.286	0.57	0.33	0.2	0	-0.285	-0.428	-0.428	-0.428	-0.428	0.29	0.33	0.2	0	B
140	26	d140s26	The two-year work ban imposed on her at the end of the second world war as punishment for the close relationship she had with the inner circle of the Nazi leadership may have helped her keep up the pretence.	Dvojročný zákaz práce uložená na nej na konci druhej svetovej vojny ako trest za úzke vzťahy, ktorú mala s vnútorným kruhu nacistického vedenia môže pomohli jej udržať predstierať.	Dvojročný zákaz hrania, ktorý jej uložili na konci druhej svetovej vojny ako trest za úzke vzťahy s vnútorným kruhom nacistického vedenia, jej pravdepodobne pomohol ostať v utajení.	Dvojročný zákaz hrania na konci druhej svetovej vojny, ktorý mal byť trestom za úzke vzťahy s nacistickými vodcami, jej pravdepodobne dopomohol ostať v utajení.	0.667	0.792	0.792	0.792	0.625	0.46	0.25	0.15	0.08	0.375	0.5	0.5	0.5	0.375	0.7	0.46	0.28	0.12	-0.292	-0.292	-0.292	-0.292	-0.25	0.24	0.21	0.13	0.04	B
140	27	d140s27	Or she managed to keep a close relationship with both regimes.	Alebo sa jej podarilo udržať blízky vzťah s oboma režimami.	Alebo sa jej podarilo udržať blízky vzťah s oboma režimami.	Alebo sa jej podarilo udržať úzky vzťah s oboma režimami.	0.1	0.1	0.1	0.1	0.1	0.9	0.77	0.62	0.42	0.1	0.1	0.1	0.1	0.1	0.9	0.77	0.62	0.42	0	0	0	0	0	0	0	0	0	B
140	28	d140s28	A postcard dated November 1940 that she wrote to Hitler in which she thanks him profusely for a bouquet of flowers he sent her is on display in Berlin’s film museum.	Pohľadnicu z 11. 1940, ktorá napísala Hitlerovi v ktorom sa vďaka nemu hojne na kyticu kvetov poslal jej ich na displeji v berlínskom filmovom múzeu.	Pohľadnica z novembra 1940, ktorú napísala Hitlerovi, v ktorej mu ďakuje za kyticu kvetov, je vystavená v berlínskom filmovom múzeu.	Pohľadnica z novembra 1940, ktorú napísala Hitlerovi, a v ktorej mu ďakuje za krásnu kyticu, sa nachádza vo výklade filmového múzea v Berlíne.	0.739	0.826	0.826	0.826	0.739	0.32	0.04	0	0	0.391	0.435	0.435	0.435	0.435	0.6	0.45	0.38	0.3	-0.348	-0.391	-0.391	-0.391	-0.304	0.28	0.41	0.38	0.3	B
141	1	d141s1	‘Sao Paulo makes London seem like a village’	"Sao Paulo robí v Londýne vyzerať ako dediny"	"Londýn vyzerá pri Sao Paule ako dedina"	Popri Sao Paule pôsobí Londýn ako dedina	0.857	1	1	1	0.857	0.25	0	0	0	0.286	0.714	0.714	0.714	0.429	0.71	0.33	0	0	-0.571	-0.286	-0.286	-0.286	-0.428	0.46	0.33	0	0	B
141	2	d141s2	With its feverish energy, opulent nightlife, culture and chaos, the Brazilian megalopolis is a perfect setting for Joe Thomas’s debut crime thriller	S jeho horúčkovité energie, bohatý nočný život, kultúru a chaosu, brazílska metropola je ideálne prostredie pre debutový krimi Joe Thomas	S jeho horúčkovitou energiou, bohatým nočným životom, kultúrou a chaosom, brazílska metropola je ideálne prostredie pre debutový kriminálny román Joea Thomasa.	Svojou spaľujúcou energiou, rozmanitým nočným životom, kultúrou a rozruchom je toto brazílske veľkomesto dokonalým prostredím pre dej debutového kriminálneho trileru Joea Thomasa.	0.864	0.955	0.955	0.955	0.909	0.13	0	0	0	0.591	0.682	0.682	0.682	0.636	0.4	0.19	0.1	0.05	-0.273	-0.273	-0.273	-0.273	-0.273	0.27	0.19	0.1	0.05	B
141	3	d141s3	I went to Sao Paulo for love – a good reason to do anything – and stayed for 10 years.	Išiel som do Sao Paulo lásky - dobrý dôvod na to čokoľvek - a zostal po dobu 10 rokov.	Išiel som do Sao Paulo kvôli láske - dobrý dôvod na čokoľvek - a zostal som 10 rokov.	Do Sao Paula som išiel kvôli láske. Dôvod, pre ktorý dokážeme urobiť čokoľvek. Zostal som tam desať rokov.	0.611	0.889	0.889	0.889	0.833	0.36	0.05	0	0	0.444	0.778	0.778	0.778	0.667	0.55	0.17	0	0	-0.167	-0.111	-0.111	-0.111	-0.166	0.19	0.12	0	0	B
141	4	d141s4	It’s the setting for my debut novel.	Je to nastavenie pre môj debut román.	Je to prostredie pre môj debutový román.	Je to mesto, kde sa odohráva dej môjho debutového románu.	0.8	0.8	0.8	0.8	0.8	0.2	0.11	0	0	0.8	0.8	0.8	0.8	0.8	0.2	0.11	0	0	0	0	0	0	0	0	0	0	0	B
141	5	d141s5	The sheer size of the city is staggering: it takes a long time to fly in over the urban sprawl.	Samotná veľkosť mesta je ohromujúci: to trvá dlhú dobu na let v priebehu rastu miest.	Samotná veľkosť mesta je ohromujúca: treba veľa času na prejdenie rastúceho mesta.	Veľkosť mesta vás úplne ohromí. Zaberie vám veľa času, kým preletíte rastúce predmestie.	1	1	1	1	1	0.13	0.07	0	0	0.769	0.846	0.846	0.846	0.846	0.3	0.08	0	0	-0.231	-0.154	-0.154	-0.154	-0.154	0.17	0.01	0	0	B
141	6	d141s6	You feel like you’re being drawn into the city on the drive from the international airport.	Máte pocit, že ste bol vypracovaný do mesta na jazdy od medzinárodného letiska.	Máte pocit, že vás mesto ťahá už od medzinárodného letiska.	Už na ceste z medzinárodného letiska vás akoby ťahala neviditeľná sila mesta.	0.75	1	1	1	0.75	0.3	0.08	0	0	0.667	1	1	1	0.833	0.33	0.09	0	0	-0.083	0	0	0	0.083	0.03	0.01	0	0	B
141	7	d141s7	The air gets heavier, the stink of the river stronger, the heat more intense.	Vzduch dostane ťažšie, pach rieky silnejší, tepla intenzívnejší.	Vzduch oťažie, pach rieky zosilnie, teplo zintenzívnie.	Vzduch oťažie, zápach rieky zosilnie, horúčava stúpa.	0.857	0.857	0.857	0.857	0.857	0.25	0	0	0	0.429	0.429	0.429	0.429	0.429	0.57	0.33	0	0	-0.428	-0.428	-0.428	-0.428	-0.428	0.32	0.33	0	0	B
141	8	d141s8	Flying into the domestic airport, you come so close to the skyscrapers you can almost see into people’s windows.	Lietanie do domáceho letiska, prídete tak blízko mrakodrapy môžete takmer vidieť do okien ľudí.	Ak letíte do miestneho letiska, ste tak blízko mrakodrapov, že vidíte do okien ľudí.	Na vnútroštátne letisko letíte tak blízko mrakodrapov, že takmer vidíte do ich okien.	0.692	0.769	0.769	0.769	0.692	0.42	0.07	0	0	0.462	0.692	0.692	0.692	0.462	0.64	0.3	0.16	0.09	-0.23	-0.077	-0.077	-0.077	-0.23	0.22	0.23	0.16	0.09	B
141	10	d141s10	Though the day-to-day grind is pretty full on – it makes London feel like a village – it’s an energising place.	Hoci grind zo dňa na deň, je celkom plné - to robí Londýn pocit, ako dedina - je to energizujúci miesto.	Hoci v meste vládne každodenná rutina, Londýn vyzerá pri Sao Paule ako dedina. Je to energizujúce miesto.	Hoci tu ľudia prepadajú každodennej rutine, je to mesto plné energie. Londýn pri ňom pôsobí ako dedina.	0.824	1	1	1	0.765	0.42	0.1	0	0	0.588	0.941	0.941	0.941	0.824	0.41	0.12	0	0	-0.236	-0.059	-0.059	-0.059	0.059	-0.01	0.02	0	0	B
141	11	d141s11	It’s not beautiful, it’s very dense and the traffic and crime are terrible, but it’s so full of life that you feel powerful, politicised and important.	Nie je to krásne, je to veľmi hustý letovú prevádzku a zločin sú hrozné, ale je to tak plná života, že sa cítite silný, spolitizovaná a dôležité.	Nie je krásne, je veľmi husté, doprava a kriminalita sú hrozné, ale je plné života. Dodáva vám silu, aktivizuje vás a máte pocit, že ste dôležitý.	Nie je krásne. Je preľudnené, doprava a kriminalita sú hrozné, ale aj napriek tomu je plné života a cítite sa v ňom mocne a dôležito.	0.52	0.72	0.72	0.72	0.64	0.48	0.15	0.04	0	0.44	0.64	0.64	0.64	0.52	0.53	0.4	0.29	0.17	-0.08	-0.08	-0.08	-0.08	-0.12	0.05	0.25	0.25	0.17	B
141	12	d141s12	There are more places to find peace and quiet than you’d imagine.	Existuje viac miest, kde pokoj a ticho, ako by ste predstaviť.	Existuje viac miest, kde nájdete pokoj a ticho, ako by ste si predstavili.	Pokoj nájdete na viacerých miestach, než by ste čakali.	0.889	1	1	1	0.778	0.27	0.1	0	0	1	1	1	1	0.778	0.3	0.08	0	0	0.111	0	0	0	0	0.03	-0.02	0	0	B
141	13	d141s13	Parque Ibirapuera is big and green, with people rollerblading and playing football, basketball and tennis, and two of the city’s best museums.	Parque Ibirapuera je veľký a zelený, s ľuďmi na kolieskových korčuliach a hrá futbal, basketbal a tenis a dva z najlepších mestských múzeí.	Park Ibirapuera je veľký a zelený, ľudia sa v ňom korčuľujú na kolieskových korčuliach, hrajú futbal, basketbal a tenis. Nachádzajú sa v ňom dve najlepšie múzeá v meste.	Park Ibirapuera je rozľahlý a plný zelene. Ľudia tu trávia čas korčuľovaním, hraním futbalu, basketbalu a tenisu. V parku sa nachádzajú dve najlepšie múzeá na celom meste.	0.815	0.852	0.852	0.852	0.815	0.25	0.03	0	0	0.519	0.741	0.741	0.741	0.667	0.6	0.14	0.07	0	-0.296	-0.111	-0.111	-0.111	-0.148	0.35	0.11	0.07	0	B
141	14	d141s14	The Museum of Modern Art is a bit like London’s Serpentine but much bigger, and amazing.	Múzeum moderného umenia je trochu ako londýnskej Serpentine, ale oveľa väčšie a úžasné.	Múzeum moderného umenia je trochu ako londýnsky Serpentine, ale oveľa väčšie a úžasnejšie.	Múzeum moderného umenia sa podobá na galériu Serpentine v Londýne, no je oveľa veľkolepejšie.	0.571	0.714	0.714	0.714	0.714	0.42	0.15	0.08	0	0.571	0.714	0.714	0.714	0.714	0.42	0.15	0.08	0	0	0	0	0	0	0	0	0	0	B
141	15	d141s15	The museum and park were designed by the great Brazilian architect Oscar Niemeyer, whose work is all over the city.	V múzeu a parku boli navrhnuté veľkým brazílsky architekt Oscar Niemeyer, ktorého dielo je po celom meste.	Múzeu a park boli navrhnuté významným brazílskym architektom Oscarom Niemeyerom, ktorého diela nájdete v celom meste.	Múzeum a park navrhol významný brazílsky architekt Oscar Niemeyer, ktorého návrhy môžete nájsť po celom meste.	0.5	0.563	0.563	0.563	0.5	0.52	0.37	0.26	0.14	0.688	0.75	0.75	0.75	0.688	0.31	0.13	0	0	0.188	0.187	0.187	0.187	0.188	-0.21	-0.24	-0.26	-0.14	B
141	16	d141s16	And the Museu Afro Brasil gives a fascinating history of the country.	A Museu Afro Brasil dáva fascinujúce histórii krajiny.	V Múzeum Afro Brasil môžete nazrieť do fascinujúcej histórii krajiny.	Múzeum Afro Brazil umožňuje návštevníkom nahliadnuť do fascinujúcich dejín mesta.	0.9	1	1	1	0.9	0.1	0	0	0	0.7	0.8	0.8	0.8	0.8	0.3	0.11	0	0	-0.2	-0.2	-0.2	-0.2	-0.1	0.2	0.11	0	0	B
141	17	d141s17	Another one not to miss is the house of the Maria Luisa and Oscar Americano Foundation.	Ďalšie človek nemal nechať ujsť je dom Maria Luisa a Oscar Americano Foundation.	Nemali by ste si nechať ujsť dom Maria Luisa a Oscar Americano Foundation.	Nenechajte si ujsť ani tropické záhrady nadácie Maria Luisa Oscar Americano.	0.727	0.818	0.818	0.818	0.727	0.38	0.16	0	0	0.636	0.818	0.818	0.818	0.727	0.46	0.16	0	0	-0.091	0	0	0	0	0.08	0	0	0	B
141	18	d141s18	It’s the residence of a family of art, history and nature collectors, surrounded by lush greenery – when you walk in from the street the air suddenly feels a bit damper and cleaner.	Je to sídlo rodiny umenia, histórie a prírody kolektorov, obklopený bujnou zeleňou - keď vojdete z ulice vzduch náhle cíti trochu tlmič a čistejšie.	Je to sídlo rodiny zberateľov umenia, histórie a prírodných artefaktov, obklopené bujnou zeleňou - keď vojdete z ulice vzduch je zrazu vlhší a čistejší.	Je to sídlo rodiny zberateľov umenia, dejín a prírodných artefaktov, obklopené bujnou zeleňou. Keď vojdete z ulice do záhrady, vzduch má zrazu viac vlhkosti a je čistejší.	0.444	0.519	0.519	0.519	0.519	0.51	0.27	0.16	0.08	0.222	0.296	0.296	0.296	0.296	0.77	0.5	0.4	0.29	-0.222	-0.223	-0.223	-0.223	-0.223	0.26	0.23	0.24	0.21	B
141	19	d141s19	Oscar Americano established the foundation in 1974, two years after the death of his arts philanthropist Maria Luisa and months before his own death.	Oscar Americano založil nadáciu v roku 1974, dva roky po smrti jeho umenie filantropa Maria Luisa a mesiacov pred jeho vlastnou smrťou.	Oscar Americano založil nadáciu v roku 1974, dva roky po smrti svojej filantropky umenia Marii Luisi a mesiace pred svojou vlastnou smrťou.	Oscar Americano založil nadáciu v roku 1974, dva roky po smrti jeho filantropky Marii Luisy a dva mesiace pred jeho vlastnou smrťou.	0.182	0.273	0.273	0.273	0.273	0.77	0.66	0.6	0.52	0.136	0.227	0.227	0.227	0.227	0.81	0.57	0.45	0.42	-0.046	-0.046	-0.046	-0.046	-0.046	0.04	-0.09	-0.15	-0.1	B
141	20	d141s20	If you’re attracted to seediness as well as art and culture, you’ll find Sao Paulo fascinating – the two live side by side.	Ak ste priťahovaní k seediness, rovnako ako umenie a kultúry, nájdete Sao Paulo fascinujúce - Obaja žijú vedľa seba.	Ak vás priťahujú ošarpané predmety rovnako ako umenie a kultúra, Sao Paulo vás úplne očarí - Obe idú ruka v ruke.	Ak vás priťahujú ošarpané predmety, umenie a kultúra, Sao Paolo vás úplne očarí. Nájdete tu všetko.	0.938	1	1	1	0.875	0.21	0.05	0	0	0.688	0.688	0.688	0.688	0.5	0.5	0.38	0.25	0.1	-0.25	-0.312	-0.312	-0.312	-0.375	0.29	0.33	0.25	0.1	B
141	21	d141s21	In the old centre is Pinacoteca, a beautiful gallery, and Sala Sao Paolo, a classical music venue, just a few blocks away from Crackland, hell on earth in a beautiful part of town.	V starom centre je Pinacoteca, krásny galérie a Sala Sao Paolo, klasickej hudby miesto, len pár blokov od Crackland, peklo na zemi v krásnej časti mesta.	V starom centre je Pinacoteca, krásna galéria a Sala Sao Paolo, podujatia klasickej hudby, nájdete len pár blokov od Cracklandu, pekla na zemi v krásnej časti mesta.	V starom meste sa nachádza nádherná galéria Pinacoteca a podujatia klasickej hudby sa organizujú len niekoľko ulíc od Cracklandu, epicentra drogovo závislých, pekla v rajskej časti mesta.	0.593	0.704	0.704	0.704	0.667	0.4	0.11	0	0	0.444	0.63	0.63	0.63	0.556	0.55	0.19	0.04	0	-0.149	-0.074	-0.074	-0.074	-0.111	0.15	0.08	0.04	0	B
141	22	d141s22	For extraordinary views (and expensive drinks) go to the 30th-floor View Bar in Jardins.	Pre mimoriadnymi výhľadmi (a drahé nápoje), prejdite na 30. poschodí View Bar v Jardins.	Pre mimoriadny výhľad (a drahé nápoje), navštívte View Bar na 30. poschodí v Jardins.	Ak chcete zažiť výnimočný výhľad (s predraženými nápojmi) navštívte reštauráciu a bar The View Bar na tridsiatom poschodí v štvrti Jardins.	0.619	0.81	0.81	0.81	0.762	0.33	0.05	0	0	0.524	0.619	0.619	0.619	0.571	0.42	0.15	0.05	0	-0.095	-0.191	-0.191	-0.191	-0.191	0.09	0.1	0.05	0	B
141	24	d141s24	It’s surrounded by a mix of office and residential blocks, so at dusk lights go off and on around town like some weird morse code as people leave work and go home.	Je obklopený kombinácia kancelárskych a obytných blokoch, takže za súmraku svetlá zhasnú a okolo mesta ako nejaký divný Morseovej abecede, ako ľudia odísť z práce a ísť domov.	Je obklopený kancelárskymi a obytnými budovami, takže keď ľudia odchádzajú za súmraku z roboty, svetlá sa zhasínajú a zožínajú ako zvláštna Morseová abeceda.	Je obklopený kancelárskymi a obytnými budovami, takže pri súmraku sa svetlá v budovách zažínajú a zhasínajú ako zvláštna morzeovka.	1	1	1	1	0.737	0.35	0.03	0	0	0.474	0.632	0.632	0.632	0.526	0.6	0.31	0.23	0.2	-0.526	-0.368	-0.368	-0.368	-0.211	0.25	0.28	0.23	0.2	B
141	25	d141s25	Jardins is probably the best area to stay in, too, with lots of great bars and restaurants.	Jardins je pravdepodobne najlepší priestor, aby zostali v taky, s množstvom skvelých barov a reštaurácií.	Jardins je pravdepodobne najlepšia obytná štvrť s množstvom skvelých barov a reštaurácií.	Štvrť Jardins je pravdepodobne ideálnym miestom na bývanie s mnohými skvelými barmi a reštauráciami.	0.714	0.786	0.786	0.786	0.714	0.33	0.14	0.07	0	0.571	0.643	0.643	0.643	0.643	0.42	0.15	0.08	0	-0.143	-0.143	-0.143	-0.143	-0.071	0.09	0.01	0.01	0	B
141	26	d141s26	The rooftop Skye Bar in Hotel Unique has more great views and would be a perfect place for Bond to parachute on to.	Strešné Skye Bar v hoteli Unique má viac nádherný výhľad a bolo by ideálne miesto pre Bond k padáku na.	Strešný Skye Bar v hoteli Unique ponúka mnoho skvelých výhľadov a bolo by ideálne miesto pre Bonda na pristátie s padákom.	Ďalší nádherný výhľad ponúka reštaurácia Skye Bar na streche hotela Unique. Bola by tiež dokonalým miestom pre Bonda na pristátie s padákom.	0.591	0.909	0.909	0.909	0.773	0.36	0.09	0	0	0.455	0.682	0.682	0.682	0.545	0.5	0.28	0.2	0.15	-0.136	-0.227	-0.227	-0.227	-0.228	0.14	0.19	0.2	0.15	B
141	27	d141s27	There’s a pool and the hotel’s shaped like a big boat.	K dispozícii je bazén a hotelová v tvare veľkej lodi.	K dispozícii je bazén a hotel má tvar veľkej lodi.	Nachádza sa tam aj bazén a hotel má tvar veľkej lode.	0.727	0.727	0.727	0.727	0.636	0.27	0.1	0	0	0.455	0.455	0.455	0.455	0.364	0.54	0.5	0.45	0.38	-0.272	-0.272	-0.272	-0.272	-0.272	0.27	0.4	0.45	0.38	B
141	28	d141s28	My book, Paradise City, is named after the Paraisópolis favela, where a key incident happens at the beginning.	Moja kniha, Paradise City, je pomenovaná po Paraisópolis Favela, kde kľúčovú udalosť sa stane na začiatku.	Moja kniha, Paradise City, je pomenovaná po Paraisópolis Favela, kde sa kľúčová udalosť odohráva na začiatku.	Moja kniha Rajské mesto (Paradise City) je pomenovaná po chudobnej štvrti Paraisópolis, predmestskej časti Sao Paula, ktorá je dejiskom kľúčovej udalosti na začiatku knihy.	0.625	0.667	0.667	0.667	0.667	0.33	0.17	0.04	0	0.625	0.667	0.667	0.667	0.667	0.33	0.17	0.04	0	0	0	0	0	0	0	0	0	0	B
141	29	d141s29	Sao Paulo’s a great setting for crime fiction because of the huge gulf between rich and poor – there’s a disenfranchised underclass and a sense of lawlessness.	Sao Paulo je skvelý nastavenie pre detektívky vzhľadom k obrovskému priepasť medzi bohatými a chudobnými - je tu disenfranchised chudobnej a pocit nespravodlivosti.	Sao Paulo je skvelé prostredie pre detektívky, vzhľadom na obrovskú priepasť medzi bohatými a chudobnými - nemajú hlasovacie právo a zmysel pre spravodlivosť.	Kvôli priepastným rozdielom medzi bohatými a chudobnými je Sao Paolo skvelým prostredím pre kriminálny román. Je bydliskom ľudí nízkej spoločenskej vrstvy bez hlasovacieho práva a zmyslu pre zákon a poriadok.	0.667	0.933	0.933	0.933	0.8	0.26	0.1	0.07	0.03	0.667	0.9	0.9	0.9	0.8	0.26	0.1	0.07	0.03	0	-0.033	-0.033	-0.033	0	0	0	0	0	B
141	30	d141s30	It’s a place rich in culture, dripping in cash and undermined by political lawlessness.	Je to miesto s bohatou kultúrou, kvapkajúcej v hotovosti a podkopal politickú bezprávie.	Je to miesto s bohatou kultúrou, topiace sa v peniazoch a zničené politickými zločinmi.	Mesto má bohatú kultúru, topí sa v peniazoch a je zničené politickými zločinmi.	0.769	0.923	0.923	0.923	0.846	0.23	0	0	0	0.462	0.615	0.615	0.615	0.462	0.57	0.38	0.25	0.09	-0.307	-0.308	-0.308	-0.308	-0.384	0.34	0.38	0.25	0.09	B
141	31	d141s31	A crime novel allows access to these different worlds.	Zločin román umožňuje prístup k týmto rozdielnych svetov.	Kriminálny román nám sprístupňuje tieto rozdielne svety.	Román nám umožňuje nahliadnuť do týchto odlišných miest.	0.75	0.875	0.875	0.875	0.75	0.25	0	0	0	0.75	0.875	0.875	0.875	0.875	0.25	0.14	0	0	0	0	0	0	0.125	0	0.14	0	0	B
141	32	d141s32	Crime in Sao Paulo is run by a gang called PCC – from jail.	Zločin v Sao Paulo je prevádzkovaný gang s názvom PCC - z väzenia.	Zločin v Sao Paulo je riadený väzenským gangom nazývaným Prvá jednotka mesta (PCC).	Podsvetie v Sao Paule patrí väzenskému gangu nazývanému Primeiro Comando da Capital (Prvá jednotka mesta).	0.933	0.933	0.933	0.933	0.867	0.06	0	0	0	0.733	0.8	0.8	0.8	0.733	0.26	0.14	0.07	0	-0.2	-0.133	-0.133	-0.133	-0.134	0.2	0.14	0.07	0	B
141	33	d141s33	On the weekend before the World Cup in 2006, they demanded wide screen TVs to watch the game.	Cez víkend pred Svetovom pohári v roku 2006, oni požadovali veľkoplošná obrazovka TV sledovať hru.	Cez víkend pred Svetovým pohárom v roku 2006, žiadali širokouhlé televízore, aby mohli sledovať zápas.	Počas víkendu pred Svetovým pohárom v roku 2006 požadovali širokouhlé televízory, aby mohli sledovať zápas.	0.6	0.667	0.667	0.667	0.6	0.4	0.14	0.07	0	0.267	0.267	0.267	0.267	0.2	0.73	0.57	0.46	0.33	-0.333	-0.4	-0.4	-0.4	-0.4	0.33	0.43	0.39	0.33	B
141	34	d141s34	When the authorities refused they said they’d cause chaos across the city – and they did for three days.	Keď úrady odmietli povedali, že by spôsobiť chaos po celom meste - a oni robili po dobu troch dní.	Keď úrady odmietli povedali, že spôsobia chaos v celom meste - Trval tri dni.	Keď to vláda odmietla, povedali, vyhrážali rozruchom v celom meste, čo sa nakoniec aj splnili. Trval tri dni,	0.833	0.889	0.889	0.889	0.833	0.21	0.05	0	0	0.556	0.611	0.611	0.611	0.611	0.44	0.23	0.12	0	-0.277	-0.278	-0.278	-0.278	-0.222	0.23	0.18	0.12	0	B
141	35	d141s35	Police were attacked, buses hijacked and set on fire – when they authorities finally agreed to the TVs the mayhem stopped.	Polícia boli napadnutí, autobusy unesená a zapálený - keď úrady nakoniec súhlasil s televízormi zmrzačenie zastavil.	Napadli policajtov, uniesli autobusy a podpálili domy. Keď úrady nakoniec súhlasili s televízormi, zmätok prestal.	počas ktorých napadli policajtov, uniesli a podpálili autobusy. Keď nakoniec vláda vyhovela ich žiadosti, nepokoje ustali.	0.75	0.875	0.875	0.875	0.813	0.25	0	0	0	0.5	0.688	0.688	0.688	0.688	0.5	0.2	0.07	0	-0.25	-0.187	-0.187	-0.187	-0.125	0.25	0.2	0.07	0	B
141	36	d141s36	It was that weekend that the seed of the idea for my novel was planted.	Bol to ten víkend, že osivo nápadom môjho románu bola vysadená.	V ten víkend sa zrodila téma pre môj román.	V ten víkend sa vo mne zrodil nápad napísať román.	0.9	0.9	0.9	0.9	0.8	0.18	0.1	0	0	0.5	0.5	0.5	0.5	0.5	0.5	0.33	0.25	0.15	-0.4	-0.4	-0.4	-0.4	-0.3	0.32	0.23	0.25	0.15	B
141	37	d141s37	The best thing to do in Sao Paulo is eat.	To najlepšie, čo robiť v Sao Paulo je jesť.	Najlepšie v Sao Paulo je ich jedlo.	Najlepšia vec v Sao Paule je jedlo.	0.857	0.857	0.857	0.857	0.571	0.33	0.12	0	0	0.429	0.571	0.571	0.571	0.429	0.57	0.16	0	0	-0.428	-0.286	-0.286	-0.286	-0.142	0.24	0.04	0	0	B
141	38	d141s38	You have to have feijoada, a pork and bean stew that is Brazil’s national dish and traditionally eaten on Wednesdays and Saturdays.	Musíte mať Feijoada, bravčovú a fazuľa guláš, ktorý je brazílska národné jedlo a tradične jedol v stredu av sobotu.	Dajte si Feijoada, dusené bravčové mäso s fazuľou, ktoré Brazílčania jedia stredy a soboty.	Určite ochutnajte brazílske národné jedlo feijoada, dusené bravčové mäso s fazuľou, ktoré jedávajú Brazílčania v stredy a soboty.	0.778	1	1	1	0.833	0.31	0.05	0	0	0.389	0.389	0.389	0.389	0.333	0.61	0.47	0.38	0.28	-0.389	-0.611	-0.611	-0.611	-0.5	0.3	0.42	0.38	0.28	B
141	39	d141s39	It’s said to have been invented by slaves who used to cook up left over hoofs, trotters and ears with beans.	Hovorí sa, že bol vynájdený otrokov, ktorí používajú uvariť zostane kopýt, klusákov a uši s fazuľou.	Hovorí sa, že bol vynájdený otrokmi, ktorí zvykli uvariť zvyšky kopýt, bravčových paprčiek a uší s fazuľou.	Hovorí sa, že ho vynašli otroci, ktorí zvykli variť zvyšky konských kopýt, bravčových paprčiek a uší s fazuľou.	0.556	0.556	0.556	0.556	0.556	0.44	0.17	0.06	0	0.278	0.278	0.278	0.278	0.278	0.72	0.53	0.37	0.26	-0.278	-0.278	-0.278	-0.278	-0.278	0.28	0.36	0.31	0.26	B
141	40	d141s40	There are two versions: completa, where you might get a pig’s ear, or “light”, the genteel version with good cuts of meat.	Existujú dve verzie: Completa, kde by ste mohli dostať ucho prasacia alebo "light", tým nóbl verzia s dobrými kusy mäsa.	Existujú dve verzie: Completa, s uchom z prasaťa alebo "light", ľahká verzia s kvalitnými kúskami mäsa.	Existujú dve verzie: completa s prasacím uchom, alebo diétna verzia z kvalitnejšieho mäsa.	0.923	1	1	1	0.615	0.4	0.15	0.11	0.05	0.462	0.615	0.615	0.615	0.462	0.68	0.26	0.21	0.15	-0.461	-0.385	-0.385	-0.385	-0.153	0.28	0.11	0.1	0.1	B
141	41	d141s41	Try it at Figueira Rubaiyat, a beautiful restaurant built around an enormous fig tree.	Skúste si to na Figueira Rubaiyat, krásne reštaurácie postavený okolo obrovského figovníka.	Skúste Figueira Rubaiyatu, krásnu reštauráciu postavenú okolo obrovskej figy.	Objednajte si ho vo Figueira Rubaiyat, nádhernej reštaurácii postavenej okolo obrovského figovníka.	0.5	0.5	0.5	0.5	0.417	0.5	0.27	0.1	0	0.833	0.833	0.833	0.833	0.75	0.16	0	0	0	0.333	0.333	0.333	0.333	0.333	-0.34	-0.27	-0.1	0	B
141	42	d141s42	The detective in my novel is constantly eating a pastel – a deep-fried pastry with a cheese or meat filling which you’ll find at stalls everywhere.	Detektív v mojom románe neustále jesť pastel - vyprážaný pečivo so syrom alebo mäsom náplňou, ktorá nájdete v stánkoch po celom svete.	Detektív v mojom románe neustále je pastel - vyprážané cesto plnené syrom a mäsom, ktoré predávajú v stánkoch v celom meste.	Detektív môjho románu často jedáva pastel, fritované cesto plnené syrom alebo mäsom, ktoré si môžete kúpiť v každom stánku s jedlom.	0.762	0.81	0.81	0.81	0.81	0.31	0.09	0.05	0	0.619	0.714	0.714	0.714	0.714	0.47	0.15	0.05	0	-0.143	-0.096	-0.096	-0.096	-0.096	0.16	0.06	0	0	B
141	43	d141s43	Eat them with hot sauce, they’re crunchy and delicious.	Jesť s horúcou omáčkou, sú chrumkavé a chutné.	Dajte si k nemu štipľavú omáčku, cesto je chrumkavé a chutné.	Odporúčame k nemu štipľavú omáčku. Je chrumkavé a chutné.	0.667	0.667	0.667	0.667	0.556	0.33	0.25	0.14	0	0.333	0.333	0.333	0.333	0.222	0.72	0.6	0.44	0.25	-0.334	-0.334	-0.334	-0.334	-0.334	0.39	0.35	0.3	0.25	B
141	44	d141s44	Beside caipirinha, the key drink here is chope, draft beer.	Vedľa Caipirinha, kľúč nápoj je tu chopí, čapované pivo.	Okrem nápoja Caipirinha, tradičným nápojom je chope, čapované pivo.	Okrem caipirinha je obľúbeným nápojom chope, čapované pivo.	0.625	0.75	0.75	0.75	0.5	0.44	0.12	0	0	0.25	0.5	0.5	0.5	0.5	0.77	0.25	0.14	0	-0.375	-0.25	-0.25	-0.25	0	0.33	0.13	0.14	0	B
141	45	d141s45	There are so many little bars – Bar do Juarez in Vila Madalena is a great chopperia, and Bar Léo, right in the centre, is tiny but the beer is out of this world.	Existuje mnoho malých barov - Bar robiť Juarez Vila Madalena je skvelý Chopperia a Bar Léo, priamo v centre, je malý, ale pivo je z tohto sveta.	V meste je mnoho malých barov - Bar do Juarez vo štvrti Vila Madalena je skvelý, a Bar Léo, priamo v centre, je malý, ale pivo majú božské.	V Sao Paule nájdete množstvo malých barov. Bar do Juarez je skvelá pivnica v štvrti Vila Madalena a Bar Léo, priamo v centre mesta, je síce malý, ale pivo je božské.	0.355	0.613	0.613	0.613	0.516	0.58	0.33	0.2	0.14	0.258	0.452	0.452	0.452	0.419	0.7	0.4	0.24	0.1	-0.097	-0.161	-0.161	-0.161	-0.097	0.12	0.07	0.04	-0.04	B
141	46	d141s46	If you want nightlife, try Love Story (Rua Araujo 232) – it’s very famous:	Ak chcete, nočný život, skúste milostný príbeh (Rua Araujo 232) - to je veľmi známy:	Ak si chcete v noci niekam vyraziť, navštívte bar Love Story (na ulici Rua Araujo 232), ktorý je slávny pretože:	Ak si chcete večer niekam vyraziť, vyskúšajte preslávený klub Love Story (ulica Araujo 232),	0.786	1	1	1	0.786	0.26	0.07	0	0	0.857	0.929	0.929	0.929	0.571	0.42	0.25	0.05	0	0.071	-0.071	-0.071	-0.071	-0.215	0.16	0.18	0.05	0	B
141	47	d141s47	Nick Cave used to be a regular and Mike Tyson got arrested here.	Nick Cave býval pravidelný a Mike Tyson tu zatkli.	Nick Cave bol ich pravidelným hosťom a Mikea Tysona tu zatkli.	v ktorom bol Nick Cave stálym hosťom a bol tu zatknutý Mike Tyson.	0.538	0.769	0.769	0.769	0.692	0.46	0.17	0	0	0.462	0.769	0.769	0.769	0.692	0.46	0.16	0	0	-0.076	0	0	0	0	0	-0.01	0	0	B
141	48	d141s48	It doesn’t get going until 2.30am and attracts everyone from off-duty policemen and off-duty prostitutes to rich kids and criminals.	To nie je ísť do 2.30am a priťahuje každého z off-povinnosti policajtov a mimo službu prostitútky do bohatých deti a zločinci.	V klube to začína žiť až o 2.30 ráno a priťahuje každého od policajtov a prostitútky mimo služby po bohatých a zločincov.	V klube to začne žiť až o pol tretej ráno a láka každého. Od policajtov a prostitútok mimo služby až po zbohatlíkov a kriminálnikov.	0.708	0.792	0.792	0.792	0.792	0.29	0.04	0	0	0.292	0.333	0.333	0.333	0.333	0.66	0.39	0.18	0.04	-0.416	-0.459	-0.459	-0.459	-0.459	0.37	0.35	0.18	0.04	B
141	49	d141s49	The best way to end an evening is at a padaria (bakery) that sells beer, sharing a drink and swapping stories with strangers as the sun comes up.	Najlepší spôsob, ako ukončiť večer je na Padaria (Pekáreň), ktorá predáva pivo, zdieľanie drink a vymení príbehy s cudzími ľuďmi, ako vyjde slnko.	Najlepší spôsob, ako ukončiť večer je v Padarii (Pekáreň), v ktorej sa predáva pivo, môžete popíjať s neznámymi ľuďmi a vymieňať si historky pri východe slnka.	Najlepší spôsob ako zakončiť zábavu je v padarii (pekáreni), kde si môžete kúpiť pivo, popíjať a vymieňať si historky s neznámymi ľuďmi pri východe slnka.	0.68	0.72	0.72	0.72	0.72	0.36	0.08	0.04	0	0.24	0.56	0.56	0.56	0.44	0.76	0.44	0.25	0.04	-0.44	-0.16	-0.16	-0.16	-0.28	0.4	0.36	0.21	0.04	B
141	50	d141s50	Paulistanos (people from Sao Paulo) are very proud.	Paulistanos (ľudia z Sao Paulo), sú veľmi hrdí.	Paulistanos (ľudia z Sao Paulo), sú veľmi hrdí.	Paulistanos (ako sa obyvatelia Sao Paula nazývajú) sú veľmi hrdí.	0.6	0.6	0.6	0.6	0.6	0.4	0.22	0.13	0	0.6	0.6	0.6	0.6	0.6	0.4	0.22	0.13	0	0	0	0	0	0	0	0	0	0	B
141	51	d141s51	They like to complain about their city, but no one else can!	Radi sa sťažujú na svoje mesto, ale nikto iný nemôže!	Radi sa sťažujú na svoje mesto, ale nikto iný nemôže!	Radi sa sťažujú na svoje mesto, ale robiť to môžu len oni!	0.417	0.417	0.417	0.417	0.417	0.58	0.55	0.52	0.47	0.417	0.417	0.417	0.417	0.417	0.58	0.55	0.52	0.47	0	0	0	0	0	0	0	0	0	B
141	52	d141s52	There’s a great rivalry between them and Cariocas (people from Rio).	Je tu veľká rivalita medzi nimi a Cariocas (ľudia z Ria).	Je tu veľká rivalita medzi nimi a Cariocas (ľudia z Ria).	Medzi nimi a Cariocas (obyvatelia Ria) je veľká rivalita.	0.333	1	1	1	0.667	0.72	0.4	0.22	0.12	0.333	1	1	1	0.667	0.72	0.4	0.22	0.12	0	0	0	0	0	0	0	0	0	B
141	53	d141s53	We think they’re trivial and lazy and spend all day on the beach.	Myslíme si, že sú triviálne a lenivý a stráviť celý deň na pláži.	Myslíme si, že sú triviálnia lenivý a trávia celý deň na pláži.	Myslíme si, že sú triviálni, leniví a celý deň trávia na pláži.	0.333	0.417	0.417	0.417	0.333	0.76	0.41	0.18	0.1	0.167	0.333	0.333	0.333	0.333	0.83	0.45	0.2	0.11	-0.166	-0.084	-0.084	-0.084	0	0.07	0.04	0.02	0.01	B
141	54	d141s54	They think we’re work-obsessed and square and spend all our time in shopping malls!	Myslia si, že sme medzi pracovným a súkromným posadnutí a námestia a tráviť všetok svoj čas v nákupných centrách!	O nás si zase myslia, že sme posadnutí prácou, nudní a všetok svoj čas trávime v nákupných centrách!	O nás si zase myslia, že sme vorkoholici, nudní a všetok čas trávime v nákupných centrách!	0.563	0.875	0.875	0.875	0.5	0.63	0.16	0.05	0	0.188	0.188	0.188	0.188	0.188	0.83	0.7	0.56	0.4	-0.375	-0.687	-0.687	-0.687	-0.312	0.2	0.54	0.51	0.4	B
142	1	d142s1	Revealed: thousands of children at London schools breathe toxic air	Odhalenie: tisícky detí v Londýne školách dýchať jedovatý vzduch	Odhalenie: tisícky detí v školách v Londýne dýchajú jedovatý vzduch	Odhalené: tisíce detí v školách v Londýne dýchajú toxický vzduch	0.4	0.7	0.7	0.7	0.6	0.5	0.22	0	0	0.3	0.3	0.3	0.3	0.2	0.7	0.55	0.5	0.42	-0.1	-0.4	-0.4	-0.4	-0.4	0.2	0.33	0.5	0.42	A
142	2	d142s2	Exclusive:	exkluzívne:	Exkluzívna správa:	Mimoriadna správa:	1	1	1	1	0.5	0	0	0	0	0.5	0.5	0.5	0.5	0	0.5	0	0	0	-0.5	-0.5	-0.5	-0.5	-0.5	0.5	0	0	0	A
142	3	d142s3	802 schools, nurseries and colleges are in areas where levels of nitrogen dioxide breach EU legal limits	802 školy, škôlky a vysoké školy sú v oblastiach, kde koncentrácia oxidu dusičitého porušenie zákonné limity EÚ	802 škôl, škôlok a vysokých škôl sú v oblastiach, kde koncentrácia oxidu dusičitého porušuje zákonné limity EÚ	802 škôl, vrátane materských a stredných sa nachádza v oblasti, kde hodnota oxidu dusičitého v ovzduší presahuje povolenú hranicu stanovenú Európskou úniou	0.682	0.727	0.727	0.727	0.727	0.27	0.04	0	0	0.636	0.682	0.682	0.682	0.682	0.36	0.09	0	0	-0.046	-0.045	-0.045	-0.045	-0.045	0.09	0.05	0	0	A
142	4	d142s4	Tens of thousands of children at more than 800 schools, nurseries and colleges in London are being exposed to illegal levels of air pollution that risk causing lifelong health problems, the Guardian can disclose.	Desiatky tisíc detí vo viac ako 800 škôl, škôlok a škôl v Londýne sú vystavení nelegálnym úrovne znečistenia ovzdušia, ktoré však môže vyvolať celoživotné zdravotné problémy, Guardian môže zverejniť.	Desiatky tisíc detí vo viac ako 800 školách, škôlkach a vysokých školách v Londýne sú vystavené nelegálnym úrovniam znečistenia ovzdušia, čo môže vyvolať celoživotné zdravotné problémy, odhaľuje denník Guardian.	Desiatky tisíc detí vo viac než 800 materských a stredných školách v Londýne sú vystavované znečistenému vzduchu, ktorý presahuje povolené hodnoty, čo môže spôsobiť celoživotné zdravotné problémy, odhaľuje denník the Guardian.	0.516	0.581	0.581	0.581	0.581	0.51	0.26	0.17	0.07	0.387	0.419	0.419	0.419	0.419	0.64	0.4	0.27	0.17	-0.129	-0.162	-0.162	-0.162	-0.162	0.13	0.14	0.1	0.1	A
142	5	d142s5	A study identifies 802 educational institutions where pupils as young as three are being exposed to levels of nitrogen dioxide that breach EU legal limits and which the government accepts are harmful to health.	Štúdia identifikuje 802 vzdelávacích inštitúcií, kde žiaci tak mladý ako tri sú vystavené úrovniam oxidu dusičitého, ktoré porušujú zákonné limity EÚ a ktoré vláda prijíma sú škodlivé pre zdravie.	Štúdia identifikovala 802 vzdelávacích inštitúcií, kde už trojročné deti sú vystavené úrovniam oxidu dusičitého, ktoré porušujú zákonné limity EÚ, ktoré prijala aj vláda,a ktoré sú škodlivé pre zdravie.	Štúdia určila 802 vzdelávacích inštitúcií, v ktorých sú už 3-ročné deti vystavované hodnotám oxidu dusičitého presahujúcim povolenú hranicu stanovenú Európskou úniou, ktorú prijala i vláda, a ktoré sú zdraviu škodlivé.	0.6	0.8	0.8	0.8	0.733	0.43	0.13	0.03	0	0.567	0.7	0.7	0.7	0.667	0.5	0.13	0.03	0	-0.033	-0.1	-0.1	-0.1	-0.066	0.07	0	0	0	A
142	6	d142s6	The research, commissioned by the mayor of London, Sadiq Khan, suggests thousands more children and young people are at risk from toxic air than previously thought.	Výskum zadala starosta Londýna, Sadiq Khan, navrhne ďalšie tisícky detí a mladých ľudí sú ohrozené toxických vzduchu, než sa predtým myslelo.	Výskum, ktorý zadal starosta Londýna, Sadiq Khan, naznačuje, že v ohrození zdravia v dôsledku vystavenia toxickému vzduchu je o tisíce detí a mladých ľudí viac ako sa predpokladalo.	Výskum, ktorý si dal vypracovať starosta Londýna Sadiq Khan naznačuje, že v ohrození zdravia v dôsledku vystavovania sa toxickému vzduchu je o tisíce detí a mladých ľudí viac ako sa predpokladalo.	0.613	0.806	0.806	0.806	0.742	0.35	0.2	0.14	0.07	0.129	0.161	0.161	0.161	0.161	0.83	0.76	0.69	0.65	-0.484	-0.645	-0.645	-0.645	-0.581	0.48	0.56	0.55	0.58	A
142	7	d142s7	Khan said the results were devastating and warned that it was the capitalâ€™s poorest children who were bearing the brunt of the air pollution crisis.	Khan povedal, že výsledky boli zničujúce a varoval, že to bolo najchudobnejšie deti Capital € ™ s, ktorí nesú hlavný nápor znečistenia ovzdušia krízy.	Khan povedal, že výsledky boli zničujúce a varoval, že to sú najchudobnejšie deti hlavného mesta, ktoré nesú bremeno krízy znečisteného ovzdušia.	Khan povedal, že výsledky boli šokujúce a upozornil na fakt, že sú to práve najchudobnejšie deti hlavného mesta, ktoré nesú bremeno krízy znečisteného ovzdušia.	0.458	0.625	0.625	0.625	0.583	0.54	0.21	0.13	0.09	0.208	0.25	0.25	0.25	0.25	0.79	0.56	0.5	0.43	-0.25	-0.375	-0.375	-0.375	-0.333	0.25	0.35	0.37	0.34	A
142	8	d142s8	â€oIt is an outrage that more than 800 schools, nurseries and other educational institutions are in areas breaching legal air pollution limits,â€? he said.	â € oIt je škandalózne, že viac ako 800 škôl, škôlok a ďalších vzdelávacích inštitúcií sa v oblasti porušujú zákonné limity znečistenia ovzdušia, â € povedal.	"Je škandalózne, že viac ako 800 škôl, škôlok a ďalších vzdelávacích inštitúcií je v oblasti, kde sa porušujú zákonné limity znečistenia ovzdušia," povedal.	„Je poburujúce, že viac než 800 materských a základných škôl či iných vzdelávacích inštitúcií sa nachádza v oblastiach, kde stupeň znečistenia ovzdušia presahuje povolenú hranicu,“ povedal.	0.538	0.769	0.769	0.769	0.654	0.46	0.16	0.04	0	0.5	0.692	0.692	0.692	0.615	0.5	0.12	0	0	-0.038	-0.077	-0.077	-0.077	-0.039	0.04	-0.04	-0.04	0	A
142	9	d142s9	â€oThis is an environmental challenge, a public health challenge but also â€“ and no one talks about this â€“ it is fundamentally an issue of social justice.	â € oThis je výzvou pre životné prostredie, verejné zdravie, ale aj výzvou â € "a nikto sa hovorí o tomto €" to je v zásade otázkou sociálnej spravodlivosti.	"Je to problém životného prostredia, verejného zdravia, ale je to v zásade aj otázkou sociálnej spravodlivosti, o čom nikto hovorí"	„Je to environmentálny problém a problém verejného zdravia, avšak je to v zásade tiež otázka sociálnej spravodlivosti, o čom však nik nehovorí.	0.909	1	1	1	0.727	0.31	0.07	0	0	0.409	0.455	0.455	0.455	0.409	0.59	0.38	0.2	0.1	-0.5	-0.545	-0.545	-0.545	-0.318	0.28	0.31	0.2	0.1	A
142	10	d142s10	If you are a poor Londoner you are more likely to suffer from illegal air.â€	Ak ste chudobný Londýnčan je viac pravdepodobné, že trpí nelegálnym air.â €	Ak ste chudobný Londýnčan je viac pravdepodobné, že ste vystavený nelegálnemu ovzdušiu.	Ak ste chudobným Londýnčanom, tak je tu vyššia pravdepodobnosť, že ste vystavený presahujúcim hodnotám znečisteného prostredia.“	0.688	0.75	0.75	0.75	0.75	0.25	0.06	0	0	0.625	0.625	0.625	0.625	0.625	0.37	0.2	0.07	0	-0.063	-0.125	-0.125	-0.125	-0.125	0.12	0.14	0.07	0	A
142	11	d142s11	Khan called for the government to introduce a clean air act and for a diesel scrappage scheme to take polluting cars off the road quickly.	Khan vyzval vládu, aby zaviedla zákonom o ochrane ovzdušia a o systéme diesel zošrotovania, aby sa rýchlo znečisťujúcich automobilov z ciest.	Khan vyzval vládu, aby zaviedla zákon o ochrane ovzdušia a systém zošrotovania áut s naftovým motorom, aby z ciest čo najrýchlejšie stiahla znečisťujúce autá.	Khan vyzval vládu, aby predložila zákon o čistom ovzduší, a aby z ciest čo najrýchlejšie stiahla znečisťujúce autá na základe plánu o zavedení šrotovného na vozidlá s naftovým motorom.	0.655	0.793	0.793	0.793	0.759	0.34	0.14	0.07	0.04	0.345	0.69	0.69	0.69	0.483	0.62	0.46	0.33	0.23	-0.31	-0.103	-0.103	-0.103	-0.276	0.28	0.32	0.26	0.19	A
142	12	d142s12	The results show nearly double the number of educational institutions than previously highlighted are affected by illegal levels of toxic air.	Výsledky ukazujú, takmer dvojnásobný počet vzdelávacích inštitúcií ako predtým upozorňoval stanú obeťou nelegálnych úrovňou toxického vzduchu.	Výsledky ukazujú takmer dvojnásobný počet vzdelávacích inštitúcií než ako sa predtým poukazovalo, ktoré sú obeťou nelegálnych úrovní toxického vzduchu.	Výsledky ukazujú, takmer dvojnásobok vzdelávacích inštitúcií než ako sa predtým poukazovalo je postihnutý vysokými hodnotami toxického vzduchu.	0.471	0.529	0.529	0.529	0.529	0.52	0.25	0.06	0	0.412	0.412	0.412	0.412	0.412	0.63	0.5	0.35	0.25	-0.059	-0.117	-0.117	-0.117	-0.117	0.11	0.25	0.29	0.25	A
142	13	d142s13	A report that was kept secret by former mayor Boris Johnson revealed last year 433 primaries were exposed to dangerous levels of air pollution.	Správa, ktorá bola držaná v tajnosti bývalý starosta Boris Johnson odhalila v minulom roku 433 primárky boli vystavené nebezpečným úrovniam znečistenia ovzdušia.	Správa, ktorá bola držaná v tajnosti bývalým starostom Borisom Johnsonom odhalila v minulom roku 433 základných škôl, ktoré boli vystavené nebezpečným úrovniam znečistenia ovzdušia.	Písomná správa, ktorú bývalý starosta Boris Johnson uchovával v tajnosti odhalila, že minulý rok bolo nebezpečným hodnotám znečisteného vzduchu vystavených 433 základných škôl.	0.565	0.87	0.87	0.87	0.739	0.47	0.18	0.09	0.05	0.696	1	1	1	0.783	0.37	0.13	0.04	0	0.131	0.13	0.13	0.13	0.044	-0.1	-0.05	-0.05	-0.05	A
142	14	d142s14	The new data shows 802 out of 3261 nurseries, primary and secondary schools and higher education colleges, are within 150 metres of nitrogen dioxide pollution levels that exceed the EU legal limit of 40Âµg/m3 (40 micrograms per cubic metre of air).	Nové dáta ukazujú 802 von 3261 škôlok, základných a stredných škôl a vysokých škôl vyššieho vzdelávania, sú do 150 metrov od hladiny dusíka znečistenia uhličitý, ktoré presahujú povolený limit EÚ 40Âµg / m3 (40 mikrogramov na meter kubický vzduchu).	Nové údaje ukazujú 802 z 3261 škôlok, základných, stredných škôl a vysokých škôl, ktoré sú do 150 metrov od oblasti, kde hladiny znečistenia oxidom uhličitým presahujú povolený limit EÚ 40Âµg / m3 (40 mikrogramov na meter kubický vzduchu).	Nové údaje hovoria o 802 z celkovo 3261 materských, základných, stredných a vysokých škôl, ktoré sa nachádzajú menej ako 150 metrov od oblasti, kde hladiny oxidu dusičitého presahujú povolenú hranicu stanovenou Európskou úniou o 40µg/m3 (40 mikrogramov na kubický meter vzduchu).	0.512	0.659	0.659	0.659	0.659	0.53	0.15	0.07	0	0.415	0.512	0.512	0.512	0.512	0.6	0.32	0.18	0.1	-0.097	-0.147	-0.147	-0.147	-0.147	0.07	0.17	0.11	0.1	A
143	2	d143s2	New study reveals negative impact of climate change on ocean and its creatures.	Nová štúdia ukazuje negatívny dopad klimatických zmien na oceánu a jeho stvorenia.	Nová štúdia ukazuje negatívny dopad klimatických zmien na oceán a jeho stvorenia.	Nová štúdia odhaľuje negatívny vplyv klimatických zmien na oceán a živočíchy v ňom žijúce.	0.5	0.5	0.5	0.5	0.5	0.5	0.23	0.08	0	0.429	0.429	0.429	0.429	0.429	0.57	0.38	0.25	0.19	-0.071	-0.071	-0.071	-0.071	-0.071	0.07	0.15	0.17	0.19	C
143	3	d143s3	The deep ocean and the creatures that live there are facing a desperate future due to food shortages and changing temperatures.	Hlboký oceán a bytosti, ktoré tam žijú, sa stretávajú s zúfalý budúcnosti vzhľadom na nedostatok potravín a meniace sa teploty.	Hlboký oceán a bytosti, ktoré tam žijú, budú čeliť negatívnej budúcnosti vzhľadom na nedostatok potravín a meniace sa teploty.	Hlbiny oceánu a jeho „obyvatelia" nemajú najlepšie vyhliadky do budúcnosti. To je zapríčinené najmä nedostatkom potravy a zmenami teplôt.	0.895	0.947	0.947	0.947	0.895	0.15	0	0	0	0.842	0.947	0.947	0.947	0.895	0.15	0	0	0	-0.053	0	0	0	0	0	0	0	0	C
143	4	d143s4	“We need to wake up and start really realising that [with] the deep ocean, even though we can’t see it … we are going to be having a huge effect on the largest environment on the planet,” said Andrew Sweetman, the co-author of the research from Heriot-Watt University in Edinburgh.	"Musíme sa prebudiť a začať naozaj uvedomil, že [s] hlboký oceán, aj keď nemôžeme vidieť ... budeme sa, že má obrovský vplyv na najväčšiu životné prostredie na planéte," povedal Andrew Sweetman sa spoluautor výskumu z Heriot-Watt University v Edinburghu.	"Musíme sa prebudiť a začať si naozaj uvedomovať, že hlboký oceán, aj keď ho nemôžeme vidieť, má obrovský vplyv na najväčšiu časť životného prostredie na planéte," povedal Andrew Sweetman, poluautor výskumu z Heriot-Wattovej Univerzity v Edinburghu.	„Musíme sa zobudiť a uvedomiť si, že i keď to nevidíme, zmeny v oceáne značne ovplyvnia životné prostredie na celej planéte,“ hovorí spoluautor výskumu na Heriot-Wattovej Univerzite v Edinburgu, Andrew Sweetman.	0.806	1	1	1	0.742	0.41	0.1	0.02	0	0.71	0.903	0.903	0.903	0.774	0.36	0.05	0	0	-0.096	-0.097	-0.097	-0.097	0.032	-0.05	-0.05	-0.02	0	C
143	5	d143s5	“It is pretty scary.”	"Je to celkom desivé."	"Je to celkom desivé."	„Je to desivé.“	1	1	1	1	0.667	0.25	0	0	0	1	1	1	1	0.667	0.25	0	0	0	0	0	0	0	0	0	0	0	0	C
143	6	d143s6	Published in the journal Elementa by an international group of scientists from 20 research institutes, the study describes how the team harnessed a number of climate models to explore how oceans around the world are set to change over the 21st century.	Zverejnená v časopise Elementa medzinárodná skupina vedcov z 20 výskumných ústavov, štúdie opisuje, ako sa tím využitá rad klimatických modelov, aby preskúmala, ako sú oceány po celom svete má zmeniť v priebehu 21. storočia.	Štúdia zverejnená v časopise Elementa bola vykonaná medzinárodnou skupinou vedcov z 20 výskumných ústavov. Štúdia opisuje, ako tím využitá rad klimatických modelov, aby preskúmal, ako sa oceány po celom svete majú zmeniť v priebehu 21. storočia.	Výskum bol publikovaný v časopise Elementa, podujala sa na ňom medzinárodná skupina vedcov z dvadsiatich výskumných inštitútov. Počas výskumu sa vedci zaoberali niekoľkými klimatickými modelmi, aby zistili akú zmenu môže svet v 21. storočí očakávať.	0.629	0.829	0.829	0.829	0.714	0.34	0.14	0.09	0.03	0.714	0.886	0.886	0.886	0.771	0.27	0.08	0.02	0	0.085	0.057	0.057	0.057	0.057	-0.07	-0.06	-0.07	-0.03	C
143	7	d143s7	“We wanted to look at how all of these combined stressors – warming, reduced food supply to the sea floor, deoxygenation – would work together to impact the ocean,” said Sweetman.	"Chceli sme sa pozrieť na to, ako všetky tieto kombinované stresorov - otepľovanie, znížené dodávky potravín do morského dna, dezoxygenační - bude spolupracovať, aby dopad na oceán," povedal Sweetman.	"Chceli sme sa pozrieť na to, ako všetky tieto kombinované stresové faktory - otepľovanie, znížené dodávky potravín do morského dna, odkysličovanie - budú mať dopad na oceán," povedal Sweetman.	“Chceli sme sa pozrieť na zmes všetkých negatívnych faktorov, ako je otepľovanie, nedostatok potravy na morskom dne či odkysličovanie, a aký bude ich dopad na oceán,“ vyjadril sa Sweetman.	0.586	0.759	0.759	0.759	0.69	0.34	0.14	0.07	0.03	0.586	0.759	0.759	0.759	0.655	0.34	0.14	0.07	0.03	0	0	0	0	-0.035	0	0	0	0	C
143	8	d143s8	The results reveal that the future for the deep sea is bleak.	Výsledky ukazujú, že budúcnosť hlbokého mora je bezútešný.	Výsledky ukazujú, že budúcnosť hlbokého mora je bezútešná.	Výsledky ukazujú, že budúcnosť hlbín oceána nie je ružová.	0.444	0.444	0.444	0.444	0.444	0.55	0.38	0.29	0.17	0.444	0.444	0.444	0.444	0.444	0.55	0.38	0.29	0.17	0	0	0	0	0	0	0	0	0	C
143	9	d143s9	By 2100 ocean conditions will have changed dramatically, say the authors, with so-called bathyal depths (waters reaching roughly 200 metres to 3,000 metres in depth) in the Pacific, Atlantic and Arctic Oceans increasing in temperature by up to 4C.	Tým 2100 oceáne podmienky budú dramaticky zmenili, hovoria autori, s takzvanými bathyal hĺbkach (vody dosahujúce približne 200 metrov do 3000 metrov do hĺbky) v Pacifiku, Atlantiku a Severného ľadového oceánu zvýšenie teploty až o 4 ° C.	Do roku 2100 oceánske podmienky sa dramaticky zmenia, hovoria autori. V takzvanej batypelagiálnych hĺbkach (vody dosahujúce približne 200 metrov do 3000 metrov do hĺbky) v Tichom oceáne, Atlantiku a v Severnom ľadovom oceáne nastane zvýšenie teploty až o 4 ° C.	Autori výskumu tvrdia, že podmienky v oceáne by sa mali do roku 2100 drasticky zmeniť. V tzv. batypelagiále (v hĺbke od 200 do 3 000 metrov) sa teploty Tichého, Atlantického a Severného ľadového oceánu zvýšia na 4 stupne Celzia.	0.564	0.872	0.872	0.872	0.821	0.41	0.07	0.05	0.02	0.667	1	1	1	0.846	0.44	0.04	0.02	0	0.103	0.128	0.128	0.128	0.025	0.03	-0.03	-0.03	-0.02	C
143	10	d143s10	The seafloor of even deeper ocean regions, known as abyssal depths ranging from 3,000 metres to 6,000 metres deep, could increase in temperature by up to 0.5C to 1C.	Morskom dne z ešte hlbších morských oblastiach, známy ako hlbinných hĺbok od 3000 metrov do 6000 metrov hlboká, by mohla zvýšiť teplota až o 0.5cm až 1C.	Na morskom dne v ešte hlbších morských oblastiach, známych ako abysopegiálna hĺbka, od 3000 metrov do 6000 metrov, by sa mohla zvýšiť teplota až o 0.5C až 1C.	Teplota v ešte nižších oceánskych polohách, v tzv. abysopelagiálnej vrstve, ktorá siaha do hĺbky od 3 000 do 6 000 metrov pod morom, môže teplota vystúpiť o 0,5 až 1 stupeň.	0.71	0.839	0.839	0.839	0.806	0.29	0	0	0	0.645	0.839	0.839	0.839	0.774	0.32	0.03	0	0	-0.065	0	0	0	-0.032	0.03	0.03	0	0	C
143	11	d143s11	Warming oceans are expected to result in lower oxygen concentrations, with levels predicted to fall in bathyal seafloor habitats by up to 3.7%.	Otepľovanie oceány sa očakáva, že za následok nižšiu koncentráciu kyslíka, sa hladina predpokladá, že by v bathyal Seafloor stanovíšť až o 3,7%.	Otepľovanie oceánov bude mať za následok nižšiu koncentráciu kyslíka, predpokladá sa, že v batypelagiálom živočíšnom spoločenstve by to mal byť 3,7% pokles.	Následky otepľovania oceánov sa očakávajú v podobe zníženej koncentrácie kyslíka. Jeho úroveň v batypelagiálom živočíšnom spoločenstve by mala klesnúť o 3,7%.	0.714	0.905	0.905	0.905	0.81	0.31	0.04	0	0	0.619	0.762	0.762	0.762	0.714	0.39	0.18	0.14	0.1	-0.095	-0.143	-0.143	-0.143	-0.096	0.08	0.14	0.14	0.1	C
143	12	d143s12	But even small changes, said Sweetman, could have a large impact.	Ale aj malé zmeny, povedal Sweetman, by mohlo mať veľký dopad.	Ale aj malé zmeny, povedal Sweetman, by mohli mať veľký dopad.	Podľa Sweetmana aj malé zmeny môžu so sebou priniesť rozsiahle následky.	0.727	0.818	0.818	0.818	0.727	0.27	0.2	0.11	0	0.727	0.818	0.818	0.818	0.727	0.27	0.2	0.11	0	0	0	0	0	0	0	0	0	0	C
143	13	d143s13	Rising levels of carbon dioxide, says the study, will cause waters to become more acidic – a situation that is likely to be disastrous for organisms with shells, such as molluscs, as well as corals, while fish and other creatures will also be affected.	Stúpajúcej hladiny oxidu uhličitého, uvádza štúdia, spôsobí vody, aby sa viac kyslý - je situácia, ktorá bude pravdepodobne mať katastrofálne následky pre organizmy s mušlí, ako sú mäkkýše, rovnako ako koraly, zatiaľ čo bude mať vplyv aj ryby a ostatné bytosti.	Stúpajúcej hladiny oxidu uhličitého, uvádza štúdia, urobia vodu kyslastejšou. To je situácia, ktorá bude pravdepodobne mať katastrofálne následky pre mušľovité organizmy, ako sú mäkkýše, rovnako ako koraly, zatiaľ čo to bude mať vplyv aj ryby a ostatné bytosti.	Stúpajúca hladina oxidu uhličitého by podľa štúdie mohla spôsobiť zvýšenie kyslosti vody. Táto situácia by bola katastrofálna pre koraly, či jedince žijúce v mušliach a ulitách, ako napríklad mäkkýše. Negatívny dopad neobíde ani ryby či iné živočíchy.	0.838	0.973	0.973	0.973	0.838	0.26	0.02	0	0	0.784	0.919	0.919	0.919	0.838	0.26	0.02	0	0	-0.054	-0.054	-0.054	-0.054	0	0	0	0	0	C
143	14	d143s14	The large changes are expected to occur by the end of the century, Sweetman said, “It is very unlikely that they are going to be able to adapt.”	Veľké zmeny sa očakáva, že dôjde do konca tohto storočia, povedal Sweetman, "Je veľmi pravdepodobné, že sa bude môcť sa prispôsobiť."	Veľké zmeny sa očakávajú do konca tohto storočia, povedal Sweetman, "Je veľmi pravdepodobné, že sa organizmy nebudú môcť prispôsobiť."	Sweetman hovorí, že obrovské zmeny môžeme očakávať koncom 21. storočia. “Je veľmi pravdepodobné, že sa živočíchy nebudú schopné adaptovať.”	0.684	0.842	0.842	0.842	0.737	0.47	0.15	0.1	0.05	0.526	0.737	0.737	0.737	0.684	0.47	0.16	0.11	0.06	-0.158	-0.105	-0.105	-0.105	-0.053	0	0.01	0.01	0.01	C
143	15	d143s15	As far as is known, Sweetman said, change is happening faster than at any previous point in geological history.	Pokiaľ je známe, povedal Sweetman, zmena sa deje rýchlejšie ako v ktoromkoľvek predchádzajúcom bode v geologickej histórii.	Pokiaľ je známe, povedal Sweetman, zmena sa deje rýchlejšie ako v ktoromkoľvek predchádzajúcom bode v geologickej histórii.	Doposiaľ vieme len toľko, že ešte nikdy v geologickej histórii neprišlo k zmenám tak rýchlo ako teraz.	0.765	1	1	1	0.824	0.29	0.12	0.06	0	0.765	1	1	1	0.824	0.29	0.12	0.06	0	0	0	0	0	0	0	0	0	0	C
145	1	d145s1	At the heart of our galaxy, a vast black hole is devouring matter from the dust clouds that surround it.	V centre našej galaxie, obrovská čierna diera pohlcuje hmotu z prachových mračien, ktoré ju obklopujú.	V srdci našej galaxie, obrovská čierna diera pohlcuje hmotu z prachových mračien, ktoré ju obklopujú.	V srdci našej galaxie, rozsiahla čierna diera pohlcuje hmotu z oblakov prachu, ktoré ju obklopujú.	0.267	0.267	0.267	0.267	0.267	0.73	0.5	0.3	0.16	0.2	0.2	0.2	0.2	0.2	0.8	0.64	0.46	0.25	-0.067	-0.067	-0.067	-0.067	-0.067	0.07	0.14	0.16	0.09	B
145	2	d145s2	Little by little, expanses of interstellar material are being swallowed up by this voracious galactic carnivore that, in the process, has reached a mass that is 4m times that of our sun.	Kúsok po kúsku, rozlohy medzihviezdneho materiálu sú pohltení týmto nenásytným galaktickej mäsožravec, že ??v procese, dosiahol hmotu, ktorá je 4m krát väčšia než naše Slnko.	Kúsok po kúsku, množstvá medzihviezdneho materiálu sú pohltené týmto nenásytným galaktickým mäsožravcom, ktorý počas tohto procesu, dosiahol veľkosť, ktorá je 4m krát väčšia než naše Slnko.	Postupne sú rozsiahle plochy medzihviezdneho materiálu pohlcované týmto nenásytným galaktickým mäsožravcom, ktorý počas toho dosiahol objem 4 miliónkrát väčší ako Slnko.	0.857	0.905	0.905	0.905	0.762	0.28	0.08	0	0	0.714	0.762	0.762	0.762	0.619	0.42	0.24	0.16	0.13	-0.143	-0.143	-0.143	-0.143	-0.143	0.14	0.16	0.16	0.13	B
145	3	d145s3	The Milky Way’s great black hole is 25,000 light years distant, surrounded by dense clusters of stars, shrouded by interstellar dust and, like all other black holes, incapable of emitting light.	Mliečna dráha je veľký čierna diera je 25.000 svetelných rokov ďaleko, obklopené hustými zhluky hviezd, zahalená medzihviezdneho prachu a rovnako ako všetky ostatné čierne diery, ktoré nie sú schopné emitovať svetlo.	Veľká čierna diera na Mliečnej dráhe je vzdialená 25.000 svetelných rokov, obklopená hustými zhlukmi hviezd, zahalená medzihviezdnym prachom, rovnako, ako všetky ostatné čierne diery, ktoré nie sú schopné vyžarovať svetlo.	Čierna diera na Mliečnej ceste je vzdialená 25000 svetelných rokov a je obklopená hustými zhlukmi hviezd, zahalenými medzihviezdnym prachom. Tak ako všetky ostatné čierne diery, aj táto je neschopná vyžarovať svetlo.	0.484	0.71	0.71	0.71	0.645	0.48	0.2	0.1	0.07	0.258	0.355	0.355	0.355	0.355	0.67	0.46	0.24	0.14	-0.226	-0.355	-0.355	-0.355	-0.29	0.19	0.26	0.14	0.07	B
145	5	d145s5	“It is going to be very, very hard to take this photograph but we think we now have the technological capability to do it,” says Manchester University astronomer Tom Muxlow, based at the Jodrell Bank observatory in Cheshire.	"To bude veľmi, veľmi ťažké prijať túto fotografiu, ale myslíme si, že máme teraz technologické možnosti, ako to urobiť," hovorí Manchester University astronóm Tom Muxlow, založený na observatóriu Jodrell Bank v Cheshire.	"Bude veľmi, veľmi ťažké vytvoriť takúto fotografiu, ale myslíme si, že teraz máme technologické možnosti, ako to urobiť," hovorí astronóm Tom Muxlow z Manchester University, so sídlom v observatóriu Jodrell Bank v Cheshire.	"Bude veľmi, naozaj veľmi ťažké spraviť takúto fotografiu ale myslíme si, že na to máme potrebné technologické vymoženosti," hovorí Tom Muxlow, astronóm Manchesterskej univerzity so sídlom v observatóriu Jodrell Bank v Cheshire.	0.281	0.563	0.563	0.563	0.5	0.71	0.35	0.2	0.13	0.25	0.406	0.406	0.406	0.344	0.75	0.46	0.32	0.26	-0.031	-0.157	-0.157	-0.157	-0.156	0.04	0.11	0.12	0.13	B
145	6	d145s6	“To be precise, we are not going to take a direct photograph of the black hole at our galaxy’s heart.	"Aby sme boli presní, nebudeme brať priamy fotografiu čiernej diery v centre našej galaxie.	"Aby sme boli presní, nebudeme robiť priamu fotografiu čiernej diery v centre našej galaxie.	"Aby sme boli presní, nejdeme zhotoviť priamu fotografiu čiernej diery v srdci našej galaxie.	0.286	0.286	0.286	0.286	0.286	0.71	0.53	0.33	0.18	0.214	0.214	0.214	0.214	0.214	0.78	0.61	0.41	0.27	-0.072	-0.072	-0.072	-0.072	-0.072	0.07	0.08	0.08	0.09	B
145	7	d145s7	We are actually going to take a picture of its shadow.	Sme vlastne bude odfotiť jeho tieni.	Vlastne budeme fotiť jej tieň.	V podstate ideme odfotografovať jej tieň.	1	1	1	1	0.833	0	0	0	0	0.667	0.667	0.667	0.667	0.5	0.33	0.2	0	0	-0.333	-0.333	-0.333	-0.333	-0.333	0.33	0.2	0	0	B
145	8	d145s8	It will be an image of its silhouette sliding against the background glow of radiation of the heart of the Milky Way.	Bude to obraz jeho siluetu posuvné proti pozadia žiaru žiareniu centre Mliečnej dráhy.	Bude to obraz jej siluety posúvajúcej sa proti žiarivému pozadiu zo srdca Mliečnej dráhy.	Bude to obraz siluety posúvajúcej sa oproti pozadiu žiary radiácie v srdci našej Mliečnej cesty.	0.733	0.733	0.733	0.733	0.733	0.26	0.14	0.07	0	0.467	0.6	0.6	0.6	0.6	0.53	0.28	0.15	0	-0.266	-0.133	-0.133	-0.133	-0.133	0.27	0.14	0.08	0	B
145	9	d145s9	That photograph will reveal the contours of a black hole for the first time.”	Že snímka odhalí obrysy čiernej diery prvýkrát. "	Takéto snímka prvýkrát odhalí obrysy čiernej diery."	Táto fotografia po prvý raz odhalí obrysy čiernej diery."	0.556	0.667	0.667	0.667	0.556	0.44	0.38	0.31	0.19	0.556	0.556	0.556	0.556	0.444	0.44	0.38	0.31	0.19	0	-0.111	-0.111	-0.111	-0.112	0	0	0	0	B
145	10	d145s10	It’s like a telescope that allows you to read a newspaper headline on the moon while standing on Earth	Je to ako ďalekohľad, ktorý umožňuje čítať novinový titulok na Mesiaci, keď stál na Zemi	Je to ako ďalekohľad, ktorý umožňuje čítať novinový titulok na Mesiaci, kým stojíte na Zemi	Je to ako teleskop, ktorý vám umožňuje čítať nadpisy v novinách na Mesiaci, zatiaľ čo budete stáť na Zemi.	0.526	0.526	0.526	0.526	0.526	0.47	0.22	0.06	0	0.526	0.526	0.526	0.526	0.526	0.47	0.22	0.06	0	0	0	0	0	0	0	0	0	0	B
145	11	d145s11	Our galaxy’s great black hole is also known as Sagittarius A*, because it lies in the constellation Sagittarius and the data collection that will be used to create its image is set to take place in April.	veľká čierna diera našej galaxie je tiež známy ako Sagittarius A *, pretože leží v súhvezdí Strelca a zber dát, ktorá bude použitá na vytvorenie jeho obraz je nastavený na konať v apríli.	Veľká čierna diera v našej galaxii je tiež známa ako Sagittarius A*, pretože leží v súhvezdí Strelca a zber dát, ktoré budú použité na vytvorenie jej obrazu sa bude konať v apríli.	Veľká čierna diera našej galaxie je známa ako Strelec A*, pretože leží v súhvezdí Strelca. Zbierka dát, ktoré budú použité na vytvorenie tohto obrazu bude vykonaná v apríli.	0.5	0.536	0.536	0.536	0.5	0.66	0.34	0.22	0.16	0.321	0.321	0.321	0.321	0.321	0.78	0.45	0.3	0.2	-0.179	-0.215	-0.215	-0.215	-0.179	0.12	0.11	0.08	0.04	B
145	12	d145s12	However, it will probably require a further six months of work to put together the observations made by all of the Event Horizon Telescope project’s component telescopes, which include instruments at the south pole and in the Andes, Hawaii and Europe.	Avšak, bude to pravdepodobne vyžadovať ďalších šesť mesiacov práce dať dohromady pripomienky všetkými komponentmi ďalekohľadov projektu Event Horizon Telescope, ktoré musí obsahovať nástroje na južnom póle a v Andách, Havaj a Európe.	Avšak, bude to pravdepodobne vyžadovať ďalších šesť mesiacov práce dať dohromady pozorovania zo všetkých projektových komponentov ďalekohľadu Event Horizon Telescope, ktorého súčasti sa nachádzajú na južnom póle a v Andách, na Havaji a v Európe.	Je však pravdepodobné, že prepojenie týchto pozorovaní vykonaných Event Horizon teleskopmi, ktorých časti sa nachádzajú na južnom póle, v Andách, na Hawaji a v Európe, potrvá ďalších šesť mesiacov.	0.621	1	1	1	0.69	0.4	0.22	0.06	0	0.655	0.897	0.897	0.897	0.552	0.48	0.35	0.18	0.06	0.034	-0.103	-0.103	-0.103	-0.138	0.08	0.13	0.12	0.06	B
145	13	d145s13	The resulting image, say scientists, could look very much like the one created by director Christopher Nolan for the film Interstellar.	Výsledný obraz, hovoria vedci, môže vyzerať veľmi podobne ako ten vytvorený režisér Christopher Nolan pre film Interstellar.	Vedci hovoria, že výsledný obraz môže vyzerať veľmi podobne ako ten, ktorý vytvoril režisér Christopher Nolan pre film Interstellar.	Vedci tvrdia, že výsledný obraz môže byť veľmi podobný tomu, ktorý vytvoril režisér Christopher Nolan vo filme Interstellar.	0.5	0.667	0.667	0.667	0.611	0.49	0.17	0.06	0	0.389	0.389	0.389	0.389	0.389	0.63	0.38	0.29	0.18	-0.111	-0.278	-0.278	-0.278	-0.222	0.14	0.21	0.23	0.18	B
145	14	d145s14	Working with US astrophysicist Kip Thorne, Nolan went to considerable pains to develop something that looked like a “realistic” black hole.	Práca s USA astrofyzik Kip Thorne, Nolan išiel do značnej bolesti vyvinúť niečo, čo vyzeralo ako "realistické" čiernej diery.	V spolupráci s americkým astrofyzikom Kipom Thorneom, mal Nolan poriadne ťažkosti vytvoriť niečo, čo by vyzeralo ako "realistická" čierna diera.	Nolan v spolupráci s americkým astrofyzikom Kipom Thornom prešiel mnohými útrapami pri vytváraní niečoho, čo by vyzeralo ako realistická čierna diera.	0.762	0.857	0.857	0.857	0.81	0.23	0.05	0	0	0.333	0.381	0.381	0.381	0.381	0.66	0.55	0.47	0.39	-0.429	-0.476	-0.476	-0.476	-0.429	0.43	0.5	0.47	0.39	B
145	15	d145s15	Gargantua, as it is named in the film, is depicted as a round black patch that hangs menacingly in the sky with swirling, luminous strands of matter pouring into it.	Gargantua, pretože to je menovaných vo filme, je predstavovaný ako okrúhle čierne náplasť, ktorá visí hrozivo na oblohe s víriace, svetelné pramene hmoty nalial do neho.	Gargantua, pretože tak je menovaná vo filme, je predstavovaná ako okrúhla čierna škvrna, ktorá hrozivo visí na oblohe s víriacimi sa, svetelnými prameňmi hmoty nalievajúcej sa do nej.	Gargantua, ako je pomenovaná v tomto filme, je zobrazená ako okrúhla čierna škvrna hrozivo visiaca na nebi, do ktorej sa vlievajú vírivé svetielkujúce čiastočky.	0.708	0.875	0.875	0.875	0.792	0.3	0.04	0	0	0.625	0.75	0.75	0.75	0.667	0.46	0.14	0.07	0.04	-0.083	-0.125	-0.125	-0.125	-0.125	0.16	0.1	0.07	0.04	B
146	1	d146s1	Kim Jong-nam death: poison dose so high he died in '15 to 20 minutes'	Kim Čong-nam smrť: jed dávkovať tak vysoko zomrel v roku '15 až 20 minút '	Kim Čong-nam smrť: dávka jedu bola taká vysoká, že zomrel v '15 až 20 minútach '	Smrť Kim Jong-nama nastala v priebehu 15 až 20 minút.	0.8	0.9	0.9	0.9	0.6	0.42	0.15	0.08	0	0.9	1	1	1	0.6	0.4	0.14	0.07	0	0.1	0.1	0.1	0.1	0	-0.02	-0.01	-0.01	0	C
146	2	d146s2	Ministers believe half-brother of North Korean leader was killed with more than 10mg of UN classified VX nerve agent.	Ministri veria, nevlastný brat severokórejského vodcu bol zabitý s viac ako 10 mg OSN klasifikovaná VX agenta nervu.	Ministri veria, že nevlastný brat severokórejského vodcu bol zabitý s viac ako 10 mg VX nerového plynu, klasifikovaného OSN.	Ministri sú presvedčení, že nevlastného brata severokórejského vodcu zabila vyše 10mg dávka, ktorú OSN zaraďuje k nervovému plynu VX.	0.737	0.895	0.895	0.895	0.842	0.26	0.05	0	0	0.632	0.789	0.789	0.789	0.789	0.36	0.05	0	0	-0.105	-0.106	-0.106	-0.106	-0.053	0.1	0	0	0	C
146	3	d146s3	The dose of poison given to North Korean ruler Kim Jong-un’s half-brother was so high it killed him “within 15 to 20 minutes”, Malaysia’s health minister has said.	Dávka jedu venovať severokórejského vládcu Kim Čong-un nevlastný brat bol tak vysoký, že ho zabila "počas 15 až 20 minút," Malajzia je minister zdravotníctva uviedol.	Dávka jedu podaná nevlastnému bratovi severokórejského vládcu Kim Čong-un, bola tak vysoká, že ho zabila "počas 15 až 20 minút," Malajzijský minister zdravotníctva uviedol.	Ako oznámil malajzijský minister zdravotníctva, dávka jedu, ktorou otrávili nevlastného brata Severokórejského vodcu bola tak vysoká, že zomrel v priebehu 15 až 20 minút.	0.583	0.917	0.917	0.917	0.708	0.44	0.2	0.08	0.04	0.417	0.792	0.792	0.792	0.583	0.58	0.39	0.22	0.09	-0.166	-0.125	-0.125	-0.125	-0.125	0.14	0.19	0.14	0.05	C
146	4	d146s4	Kim Jong-nam died on 13 February at Kuala Lumpur airport from being poisoned with VX nerve agent, a banned chemical substance classified by the UN as a weapon of mass destruction.	Kim Čong-nam zomrel 13. februára na letisku v Kuala Lumpur z otravy s VX agenta nervu, zakázané chemické látky OSN klasifikovaná ako zbraň hromadného ničenia.	Kim Čong-nam zomrel 13. februára na letisku v Kuala Lumpur, z otravy VX nerovým plynom, zakázanou chemickou látkou, klasifikovanou OSN ako zbraň hromadného ničenia.	Kim Jong-nam zomrel 13. februára na letisku v Kuala Lampur na následky otravy nervovým plynom VX, zakázanou chemickou látkou, ktorú OSN zaraďuje k zbraniam hromadného ničenia.	0.462	0.538	0.538	0.538	0.538	0.5	0.28	0.2	0.17	0.308	0.423	0.423	0.423	0.423	0.65	0.36	0.25	0.17	-0.154	-0.115	-0.115	-0.115	-0.115	0.15	0.08	0.05	0	C
146	5	d146s5	Subramaniam Sathasivam said on Sunday that the dose of VX given to Kim was so high it “would have affected everything”.	Subramaniam Sathasivam povedal v nedeľu, že dávka VX daná Kim bola tak vysoká, že "by ovplyvnila všetko".	Subramaniam Sathasivam povedal v nedeľu, že dávka VX podaná Kimovi bola tak vysoká, že "by ovplyvnila všetko".	Subramaniam Sathasivam v nedeľu oznámil, že dávka nervového plynu VX, ktorou otrávili Kima, bola tak vysoká, že zasiahla všetko.	0.368	0.474	0.474	0.474	0.474	0.63	0.33	0.11	0.06	0.368	0.474	0.474	0.474	0.474	0.63	0.33	0.11	0.06	0	0	0	0	0	0	0	0	0	C
146	6	d146s6	“VX only requires 10mg to be absorbed into the system to be lethal, so I presume that the amount of dose that went in is more than that,” he said at a news conference.	"VX vyžaduje iba 10mg byť včlenený do systému, ktorý má byť smrteľné, takže predpokladám, že množstvo lieku, ktorý išiel vo viac než to," povedal na tlačovej konferencii.	"VX vyžaduje iba 10mg, aby sa dostal do systému a bol smrteľný, takže predpokladám, že množstvo lieku, ktorú mu podali, bola viac než to," povedal na tlačovej konferencii.	Na tlačovej konferencii poznamenal: "Na usmrtenie stačí, aby sa do ľudského tela dostalo len 10mg VX, takže predpokladám, že množstvo, ktoré ho usmrtilo, bolo väčšie."	0.64	1	1	1	0.8	0.37	0.19	0.12	0.04	0.6	1	1	1	0.76	0.42	0.22	0.11	0.04	-0.04	0	0	0	-0.04	0.05	0.03	-0.01	0	C
146	7	d146s7	“The doses were so high and it did it so fast and all over the body, so it would have affected his heart, it would have affected his lungs, it would have affected everything.”	"Dávky boli také vysoké, a to robilo to tak rýchlo a po celom tele, takže by ovplyvnila jeho srdce, bolo by ovplyvnila jeho pľúca, že by ovplyvnila všetko."	"Dávky boli také vysoké, a účinkovali tak rýchlo a po celom tele, že by ovplyvnili jeho srdce, ovplyvnili jeho pľúca, ovplyvnili by všetko."	"Dávka bola veľmi vysoká a v tele sa rýchlo rozšírila, takže zasiahla srdce, pľúca a úplne všetko."	1	1	1	1	0.824	0.28	0	0	0	0.941	1	1	1	0.765	0.3	0	0	0	-0.059	0	0	0	-0.059	0.02	0	0	0	C
146	8	d146s8	Asked how long it took for Kim to die after he was attacked, Subramaniam said:	Na otázku, ako dlho trvalo Kim zomrel potom, čo bol napadnutý, Subramaniam povedal:	Na otázku, ako dlho trvalo kým Kim zomrel po tom, čo bol napadnutý, Subramaniam povedal:	Na otázku, po akej dobe Kim skonal, Subramaniam odpovedal:	1	1	1	1	0.667	0.3	0.08	0	0	1	1	1	1	0.667	0.33	0.07	0	0	0	0	0	0	0	0.03	-0.01	0	0	C
146	9	d146s9	“I would think it was about, from the time of onset, from the time of application, 15-20 minutes.”	"Povedal by som, že to bolo asi od doby ich nástupu, od podania žiadosti 15-20 minút."	"Povedal by som, že to bolo asi od doby ich účinkovania, od doby podania 15-20 minút."	"Myslím, že to bolo 15-20 minút od podania jedu a začiatku jeho pôsobenia."	0.692	1	1	1	0.615	0.5	0.26	0.07	0	0.692	1	1	1	0.692	0.5	0.2	0.07	0	0	0	0	0	0.077	0	-0.06	0	0	C
146	10	d146s10	Despite the poisoning, Malaysia has insisted the killing poses no remaining danger to the public and on Sunday declared its international airport a “safe zone” after completing a sweep of the terminal where Kim had been assaulted.	Cez otravy, Malajzia trvala zabíjanie nepredstavuje žiadnu zostávajúce nebezpečenstvo pre verejnosť a v nedeľu vyhlásila, že je medzinárodné letisko za "bezpečné zóny", potom, čo dokončil zákrutu terminálu, kde bol Kim napadol.	Napriek otrave, Malajzia trvala na tom, že zabíjanie nepredstavuje žiadne zostávajúce nebezpečenstvo pre verejnosť a v nedeľu vyhlásila medzinárodné letisko za "bezpečnú zónu", po tom, čo dokončili obhliadku terminálu, kde bol Kim napadnutý.	Malajzia trvala na tom, že smrtiaca dávka nepredstavuje pre verejnosť žiadne nebezpečenstvo a v nedeľu vyhlásila svoje medzinárodné letisko za bezpečnú zónu po tom, čo dokončili prehľadávanie terminálu, kde zaútočili na Kima,	0.469	0.656	0.656	0.656	0.625	0.53	0.25	0.1	0.03	0.219	0.438	0.438	0.438	0.344	0.75	0.53	0.38	0.3	-0.25	-0.218	-0.218	-0.218	-0.281	0.22	0.28	0.28	0.27	C
146	11	d146s11	The site of the assault was cordoned off during the sweep, but the rest of the terminal remained open.	Miesto útoku bola ohraničená kordónom počas ťahania, ale zvyšok terminálu zostala otvorená.	Miesto útoku bolo ohraničené kordónom počas zaisťovania, ale zvyšok terminálu zostal otvorený.	Miesto útoku bolo v čase prehľadávania ohraničené kordónom, ale ostatné terminály ostali otvorené.	0.692	0.769	0.769	0.769	0.769	0.3	0.08	0	0	0.538	0.692	0.692	0.692	0.615	0.46	0.25	0.09	0	-0.154	-0.077	-0.077	-0.077	-0.154	0.16	0.17	0.09	0	C
146	12	d146s12	Since the incident, tens of thousands of people have passed through the terminal, with the location of the assault remaining accessible.	Vzhľadom k tomu incidentu, desaťtisíce ľudí, ktoré prešli cez terminál, s umiestnením zostávajúce prístupný útoku.	Vzhľadom k tomu incidentu, desaťtisíce ľudí prešli cez terminál na mieste útoku a zostáva sprístupnený.	Miesto, kde došlo k útoku ostalo sprístupnené a aj napriek incidentu prešli terminálom desaťtisíce ľudí.	0.6	1	1	1	0.733	0.4	0.07	0	0	0.533	1	1	1	0.733	0.46	0.07	0	0	-0.067	0	0	0	0	0.06	0	0	0	C
146	13	d146s13	Security camera footage released by Japanese broadcaster Fuji TV showed the moment two women assaulted Kim with a cloth authorities suspect was laced with the nerve agent.	Bezpečnostná kamera zábery prepustený Japonská vysielacej Fuji TV ukázal v okamihu, keď obe ženy napadol Kim handrou orgány podozrivý bol oživený s nervovým agentom.	Zábery z bezpečnostnej kamery zverejnené Japonskou vysielacou Fuji TV ukázali okamih, keď obe ženy napadli Kima handrou, a úrady majú podozrenie, že bola napustená nervovým plynom.	Na bezpečnostnom zázname z kamery, ktorú poskytla televízna stanica Fuji TV je vidieť dve ženy, ktoré zaútočili na Kima kusom látky, pričom úrady majú podozrenie, že išlo o tkaninu napustenú nervovým plynom.	0.875	0.906	0.906	0.906	0.875	0.12	0.03	0	0	0.625	0.688	0.688	0.688	0.656	0.37	0.16	0.06	0.03	-0.25	-0.218	-0.218	-0.218	-0.219	0.25	0.13	0.06	0.03	C
146	14	d146s14	In later clips Kim is seen asking airport officials for medical help and rubbing his eyes and stumbling as he entered an airport clinic.	V neskorších klipov Kim je videný žiadať letiskové úradníci lekársku pomoc a šúchal si oči a potkýnal keď vstúpil kliniku na letisko.	Na ďalších záberoch je vidieť Kima, ako žiada letiskových úradníkov o lekársku pomoc a šúcha si oči a potkýna, keď vstupuje do kliniky na letisko.	Na ďalších záberoch vidieť Kima, ako zamestnancov letiska žiada o lekársku pomoc,utiera si oči a potkýna sa, keď vchádza do ošetrovne na letisku.	0.696	0.826	0.826	0.826	0.739	0.3	0.09	0.04	0	0.391	0.478	0.478	0.478	0.435	0.68	0.33	0.17	0.04	-0.305	-0.348	-0.348	-0.348	-0.304	0.38	0.24	0.13	0.04	C
146	15	d146s15	Airport authorities said he complained of dizziness and died on the way to hospital.	Letiskové úrady povedal, že sa sťažoval na závrate a zomrel na ceste do nemocnice.	Letiskové úrady povedali, že sa sťažoval na závrate a zomrel cestou do nemocnice.	Predstavitelia letiska potvrdili, že Kim sa sťažoval na závraty a zomrel pri prevoze do nemocnice.	0.467	0.467	0.467	0.467	0.4	0.6	0.28	0.07	0	0.467	0.467	0.467	0.467	0.4	0.53	0.28	0.07	0	0	0	0	0	0	-0.07	0	0	0	C
146	17	d146s17	They also said medical staff at the clinic were in good health.	Oni tiež povedal, zdravotnícky personál na klinike boli v dobrom zdravotnom stave.	Povedali tiež, že zdravotnícky personál na klinike bol v dobrom zdravotnom stave.	Rovnako potvrdili, že zdravotnícky personál kliniky je v dobrom zdravotnom stave.	0.545	0.545	0.545	0.545	0.455	0.5	0.36	0.2	0.11	0.455	0.455	0.455	0.455	0.364	0.58	0.45	0.3	0.11	-0.09	-0.09	-0.09	-0.09	-0.091	0.08	0.09	0.1	0	C
147	1	d147s1	Don’t dread old age.	Nenechajte strach starobe.	Nenechajte strach starobe.	Nezastrašujte starších.	1	1	1	1	1	0	0	0	0	1	1	1	1	1	0	0	0	0	0	0	0	0	0	0	0	0	0	B
147	2	d147s2	I’m 94, and I won’t spend my last years in fear of the Tories	Je mi 94, a nebudem tráviť svoje posledné roky v strachu z konzevativců	Mám 94, a nebudem tráviť svoje posledné roky v strachu z konzevatívcov	Mám 94 a nehodlám posledné roky prežiť v strachu z konzervatívcov.	0.545	0.636	0.636	0.636	0.455	0.53	0.33	0.09	0	0.364	0.455	0.455	0.455	0.364	0.66	0.45	0.2	0	-0.181	-0.181	-0.181	-0.181	-0.091	0.13	0.12	0.11	0	B
147	3	d147s3	Harry Leslie Smith	Harry Leslie Smith	Harry Leslie Smith	Autor: Harry Leslie Smith	0.25	0.25	0.25	0.25	0.25	0.75	0.75	0.75	0	0.25	0.25	0.25	0.25	0.25	0.75	0.75	0.75	0	0	0	0	0	0	0	0	0	0	B
147	4	d147s4	I have lived a very long time.	Žil som veľmi dlho.	Žil som veľmi dlho.	Žijem už veľmi dlhý čas.	0.8	0.8	0.8	0.8	0.6	0.2	0	0	0	0.8	0.8	0.8	0.8	0.6	0.2	0	0	0	0	0	0	0	0	0	0	0	0	B
147	5	d147s5	Tomorrow, it will be exactly 94 years ago that a midwife with a love of harsh gin and rolled cigarettes delivered me into my mother’s tired, working-class arms.	Zajtra to bude presne pred 94 rokmi, že pôrodná asistentka s láskou kruté ginu a šúľané cigarety ma vydal do unavený, pracujúcej triedy náručí svojej matky.	Zajtra to bude presne pred 94 rokmi, že pôrodná asistentka s láskou kruté ginu a šúľané cigarety ma vydala do unaveného, pracujúcej triedy náručia svojej matky.	Zajtra to bude presne 94 rokov, odkedy ma pôrodná asistentka so záľubou v gine a v cigaretách dala do unaveného náručia mojej robotníckej matky.	0.625	0.708	0.708	0.708	0.708	0.42	0.16	0.08	0.04	0.542	0.667	0.667	0.667	0.625	0.5	0.2	0.08	0.04	-0.083	-0.041	-0.041	-0.041	-0.083	0.08	0.04	0	0	B
147	6	d147s6	Neither the midwife nor my mother would have expected me to live to almost 100 because my ancestors had lived in poverty for as long as there was recorded history in Yorkshire.	Ani pôrodná asistentka, ani moja matka by očakával, aby som žil takmer 100, pretože moji predkovia žili v biede tak dlho, kým tam bol zaznamenaný histórii Yorkshire.	Ani pôrodná asistentka, ani moja matka by očakával, aby som žil takmer 100, pretože moji predkovia žili v biede tak dlho, kým tam bola zaznamenaná história Yorkshire.	Ani pôrodníčka, ani matka by však nečakali, že sa dožijem takmer 100 rokov, pretože moji predkovia žili v chudobe už odkedy sa zaznamenáva história v Yorkshire.	0.538	0.654	0.654	0.654	0.654	0.44	0.23	0.12	0.08	0.5	0.654	0.654	0.654	0.615	0.48	0.23	0.12	0.08	-0.038	0	0	0	-0.039	0.04	0	0	0	B
147	7	d147s7	Nowadays, when wealth is considered wisdom, too often old age is derided, disrespected or feared, perhaps because it is the last stage in our human journey before death.	V dnešnej dobe, keď je bohatstvo považovaný za múdrosť, až príliš často starobe sa posmieval, disrespected alebo sa bál, snáď preto, že to je poslednou etapou v našej ľudskej ceste pred smrťou.	V dnešnej dobe, keď je bohatstvo považované za múdrosť, až príliš často starobe sa posmieval, nerešpektoval ju alebo sa bál, snáď preto, že to je poslednou etapou v našej ľudskej ceste pred smrťou.	Dnes, keď je bohatstvo považované za múdrosť, sa starším ľudom príliš často vysmievajú, obávajú sa ich alebo ich nerešpektujú, možno aj preto, lebo žijú v poslednej etape cesty života pred smrťou.	0.581	0.774	0.774	0.774	0.645	0.5	0.16	0.03	0	0.581	0.774	0.774	0.774	0.613	0.51	0.21	0.12	0.1	0	0	0	0	-0.032	0.01	0.05	0.09	0.1	B
147	8	d147s8	But in this era of Trump and Brexit, ignoring the assets of knowledge that are acquired over a long life could be as lethal as disregarding a dead canary in a coal mine.	Ale v tejto dobe Trump a Brexit, ignoruje majetok znalostí, ktoré sú získané v priebehu dlhého života môže byť až smrteľné následky nerešpektovanie mŕtveho kanárika v uhoľnej bani.	Ale v tejto dobe Trumpa a Brexitu, ignorovanie majetku znalostí, ktoré sú získané v priebehu dlhého života môže byť až smrteľné následky nerešpektovanie mŕtveho kanárika v uhoľnej bani.	V tomto období Trumpa a Brexitu by však ignorovanie prínosu vedomostí získaných počas tak dlhého života mohlo byť tak osudným ako prehliadnutie mŕtveho kanárika v uhoľnej bani.	0.667	0.667	0.667	0.667	0.667	0.39	0.18	0.11	0.08	0.556	0.593	0.593	0.593	0.593	0.5	0.25	0.15	0.08	-0.111	-0.074	-0.074	-0.074	-0.074	0.11	0.07	0.04	0	B
147	9	d147s9	I have been living on borrowed time since my birth in Barnsley all those years ago:	Bol som žijú na požičanom čase od môjho narodenia v Barnsley všetky tie roky:	Žil som na požičanom čase od môjho narodenia v Barnsley všetky tie roky:	Za tie roky od môjho narodenia v Barnsley som už prežil kadečo;	0.5	0.833	0.833	0.833	0.5	0.57	0.38	0.25	0.18	0.417	0.75	0.75	0.75	0.5	0.61	0.41	0.27	0.2	-0.083	-0.083	-0.083	-0.083	0	0.04	0.03	0.02	0.02	B
147	10	d147s10	I survived both the depression and the second world war.	Prežil som ako depresie a druhou svetovou vojnou.	Prežil som ako depresie a druhú svetovú vojnu.	prežil som hospodársku krízu aj druhú svetovú vojnu.	0.75	0.75	0.75	0.75	0.75	0.25	0.14	0	0	0.375	0.375	0.375	0.375	0.375	0.62	0.42	0.16	0	-0.375	-0.375	-0.375	-0.375	-0.375	0.37	0.28	0.16	0	B
147	11	d147s11	Even in advanced old age, because I walked free of those two events, I feel like a man who beat all the odds in a high-stakes casino.	Dokonca aj v pokročilom veku, pretože som išiel bez týchto dvoch udalostí, cítim sa ako človek, ktorý porazil všetky kurzy v high-stakes kasína.	Dokonca aj v pokročilom veku, pretože som išiel bez týchto dvoch udalostí, cítim sa ako človek, ktorý porazil všetky kurzy v kasíne.	Pretože som z týchto udalostí vyšiel po vlastných nohách, sa aj napriek pokročilému veku cítim ako muž, ktorému hrá v kasíne všetko do kariet.	0.583	0.958	0.958	0.958	0.875	0.45	0.04	0	0	0.542	0.958	0.958	0.958	0.833	0.5	0.08	0	0	-0.041	0	0	0	-0.042	0.05	0.04	0	0	B
147	12	d147s12	It’s why I’ve embraced each season of my life with both joy and wonderment because I know our time on Earth is a brief interlude between nonexistence.	To je dôvod, prečo som prijal každú sezónu svojho života s oboma radosti a úžasu, pretože viem, že náš čas na Zemi je krátka prestávka medzi nebytie.	To je dôvod, prečo som prijal každú sezónu svojho života s oboma radosti a úžasu, pretože viem, že náš čas na Zemi je krátka prestávka medzi nebytím.	Aj preto som vždy každé ročné obdobie vítal s radosťou i údivom, pretože viem, že čas, ktorý strávime na Zemi, je len krátkou epizódou v nekonečne.	0.692	0.808	0.808	0.808	0.731	0.37	0.15	0.08	0	0.692	0.808	0.808	0.808	0.731	0.37	0.15	0.08	0	0	0	0	0	0	0	0	0	0	B
147	13	d147s13	Still, many people persist in thinking that old age is the end of one’s usefulness or purpose, which could explain why the news that women in South Korea can expect to live into their 90s has been badly received.	Napriek tomu mnoho ľudí pretrvávajú v domnení, že staroba je koniec niečí užitočnosti alebo účelu, čo by mohlo vysvetľovať, prečo bolo zle prijaté správy, že ženy v Južnej Kórei môžu očakávať, že žiť do ich 90s.	Napriek tomu mnoho ľudí pretrváva v domnení, že staroba je koniec niečej užitočnosti alebo účelu, čo by mohlo vysvetľovať, prečo bolo zle prijaté správy, že ženy v Južnej Kórei môžu očakávať, že budú žiť do ich 90ky.	Mnoho ľudí si však napriek tomu stále myslí, že vysoký vek je koniec užitočnosti alebo zmyslu človeka, čo by tiež vysvetľovalo, prečo informáciu, že sa ženy v Južnej Kórei môžu bežne dožiť 90 rokov verejnosť zle prijala.	0.486	0.73	0.73	0.73	0.649	0.56	0.25	0.08	0.05	0.486	0.73	0.73	0.73	0.649	0.56	0.25	0.08	0.05	0	0	0	0	0	0	0	0	0	B
147	14	d147s14	Some fear the indignity that old age may bring, or the dependence it may cause because of physical or mental impairment.	Niektorí sa obávajú, pokorovanie, že vek môže priniesť, alebo závislosť by mohlo dôjsť z dôvodu fyzického alebo mentálneho postihnutia.	Niektorí sa obávajú, pokorovanie, že vek môže priniesť, alebo závislosť by mohlo dôjsť z dôvodu fyzického alebo mentálneho postihnutia.	Niektorí sa boja nedôstojnosti, ktorá by mohla prísť s vysokým vekom, alebo nesamostatnosti, ktorú môže spôsobiť zhoršený fyzický alebo psychický stav.	0.714	0.857	0.857	0.857	0.857	0.28	0.05	0	0	0.714	0.857	0.857	0.857	0.857	0.28	0.05	0	0	0	0	0	0	0	0	0	0	0	B
147	15	d147s15	On occasion I too worry that before death sets in on me that it may rob me of the elements that make me who I am.	Príležitostne som taky strach, že predtým, než stanovuje smrť na mňa, že to môže okradnúť ma z prvkov, ktoré mi robia, kto som.	Príležitostne som taký strach, že predtým, než stanovuje smrť na mňa, že to môže okradnúť ma z prvkov, ktoré ma robia, kým som.	Z času na čas sa obávam aj toho, že predtým ako príde smrť ma tieto prvky zbavia vlastností, ktoré zo mňa robia to, kým som.	0.56	0.88	0.88	0.88	0.72	0.52	0.04	0	0	0.52	0.84	0.84	0.84	0.68	0.6	0.08	0	0	-0.04	-0.04	-0.04	-0.04	-0.04	0.08	0.04	0	0	B
147	16	d147s16	But ultimately, having experienced the profound indignity of extreme poverty during the 1930s and the sheer terror of war in the 1940s, I know that life must be battled until the bitter end.	Ale nakoniec, keď zažil hlboké poníženie extrémnej chudoby počas 1930 a číre hrôzy vojny v roku 1940, ja viem, že život musí byť bojoval až do trpkého konca.	Ale nakoniec, keď zažil hlboké poníženie extrémnej chudoby počas 1930 a číre hrôzy vojny v roku 1940, ja viem, že život musí byť boj až do trpkého konca.	Koniec koncov, tým, že som prežil hlboké poníženie počas extrémnej chudoby v 30. rokoch a hotový teror počas vojny v 40. rokoch, viem, že v živote treba bojovať až do trpkého konca.	0.455	0.636	0.636	0.636	0.606	0.42	0.21	0.06	0.03	0.455	0.636	0.636	0.636	0.606	0.42	0.21	0.06	0.03	0	0	0	0	0	0	0	0	0	B
147	17	d147s17	Eternity is just around the corner for me but I don’t fear my death.	Večnosť je hneď za rohom pre mňa, ale ja sa nebojím moju smrť.	Večnosť je hneď za rohom pre mňa, ale ja sa nebojím mojej smrti.	Večnosť už na mňa čaká za rohom, no smrti sa nebojím.	0.636	0.909	0.909	0.909	0.727	0.46	0.16	0	0	0.545	0.909	0.909	0.909	0.727	0.53	0.16	0	0	-0.091	0	0	0	0	0.07	0	0	0	B
147	18	d147s18	I only regret that death will end my dance to the music of time, no matter how slow the waltz has become to allow me keep up.	len ma mrzí, že smrť ukončí svoj tanec na hudbu času, bez ohľadu na to, ako pomalý valčík stalo, aby mi držať krok.	len ma mrzí, že smrť ukončí svoj tanec na hudbu času, bez ohľadu na to, ako pomalým sa valčík stal, aby som držal krok.	Je mi ľúto len toho, že smrť ukončí môj tanec na hudbu času, bez ohľadu na to, akým pomalým sa pre mňa stal waltz, aby som dokázal držať tempo.	0.483	0.552	0.552	0.552	0.517	0.51	0.32	0.26	0.19	0.414	0.448	0.448	0.448	0.414	0.58	0.39	0.26	0.19	-0.069	-0.104	-0.104	-0.104	-0.103	0.07	0.07	0	0	B
147	19	d147s19	I know that my physical wellbeing and dignity may yet be affected adversely by the government’s self-created social care crisis but I will not spend either my last years or days living in fear of the Tories.	Viem, že moje telesné zdravie a dôstojnosť môže napriek tomu byť nepriaznivo ovplyvnené sociálnej starostlivosti krízu vlády sami vytvorili, ale nebudem tráviť buď moje posledné roky alebo dni žijú v strachu konzevativců.	Viem, že moje telesné zdravie a dôstojnosť môže napriek tomu byť nepriaznivo ovplyvnené sociálnej starostlivosti krízu vlády sami vytvorili, ale nebudem tráviť buď moje posledné roky alebo dni životom v strachu konzevatívcov.	Viem, že moja fyzická pohoda a hrdosť môžu byť nepriaznivo ovplyvnené krízou, ktorú vláda sama vytvorila okolo sociálnej starostlivosti, no nestrávim zvyšné roky alebo dni v strachu z konzervatívcov.	0.655	0.759	0.759	0.759	0.655	0.4	0.22	0.06	0	0.655	0.759	0.759	0.759	0.655	0.4	0.22	0.06	0	0	0	0	0	0	0	0	0	0	B
147	20	d147s20	Zdroj: https://www.theguardian.com/commentisfree/2017/feb/24/dont-dread-old-age-fear-tories-tyranny-austerity	Zdroj: https://www.theguardian.com/commentisfree/2017/feb/24/dont-dread-old-age-fear-tories-tyranny-austerity	Zdroj: https://www.theguardian.com/commentisfree/2017/feb/24/dont-dread-old-age-fear-tories-tyranny-austerity	Zdroj: https://www.theguardian.com/commentisfree/2017/feb/24/dont-dread-old-age-fear-tories-tyranny-austerity	0	0	0	0	0	1	1	0	0	0	0	0	0	0	1	1	0	0	0	0	0	0	0	0	0	0	0	B
148	1	d148s1	Blind date:	Rande na slepo:	Rande na slepo:	Rande na slepo	0	0	0	0	0	1	1	1	0	0	0	0	0	0	1	1	1	0	0	0	0	0	0	0	0	0	0	B
148	2	d148s2	‘He’s a smooth talker.	"Je to hladké rečník.	"Je to hladký rečník.	"Rozpráva sa s ním skvelo.	1	1	1	1	0.8	0	0	0	0	1	1	1	1	0.8	0	0	0	0	0	0	0	0	0	0	0	0	0	B
148	3	d148s3	I think he enjoyed himself’	Myslím, že bavil '	Myslím, že sa bavil '	Myslím si, že si to užil."	0.667	0.667	0.667	0.667	0.667	0.33	0	0	0	0.667	0.667	0.667	0.667	0.667	0.33	0	0	0	0	0	0	0	0	0	0	0	0	B
148	4	d148s4	‘Super, super cool’ Dominique, 30, meets ‘confident gentleman’ Ed, 37	"Super, super cool" Dominique, 30, spĺňa "verí, pán" Ed, 37	"Super, super cool" Dominique, 30, stretla "sebavedomého, džentlmena" Eda, 37	"Super, super skvelá“ Dominique, 30, stretne „sebavedomého džentlmena“ Eda, 37	0.5	0.5	0.5	0.5	0.5	0.5	0.22	0	0	0.4	0.4	0.4	0.4	0.4	0.6	0.33	0	0	-0.1	-0.1	-0.1	-0.1	-0.1	0.1	0.11	0	0	B
148	5	d148s5	Dominique on Ed	Dominique na Ed	Dominique o Edovi	Dominique o Edovi	0.667	0.667	0.667	0.667	0.667	0.33	0	0	0	0	0	0	0	0	1	1	1	0	-0.667	-0.667	-0.667	-0.667	-0.667	0.67	1	1	0	B
148	6	d148s6	What were you hoping for?	Čo ste dúfali?	Čo ste dúfali?	Čo si očakávala?	0.667	0.667	0.667	0.667	0.667	0.33	0	0	0	0.667	0.667	0.667	0.667	0.667	0.33	0	0	0	0	0	0	0	0	0	0	0	0	B
148	7	d148s7	A fun night – and I got one.	Zábavná noc - a ja som dostal jeden.	Že to bude zábavná noc - a aj bola.	Večer plný zábavy a aj som ho zažila.	0.75	0.75	0.75	0.75	0.625	0.25	0	0	0	0.875	1	1	1	0.75	0.22	0.12	0	0	0.125	0.25	0.25	0.25	0.125	-0.03	0.12	0	0	B
148	8	d148s8	First impressions?	Prvé dojmy?	Prvé dojmy?	Prvé dojmy?	0	0	0	0	0	1	1	0	0	0	0	0	0	0	1	1	0	0	0	0	0	0	0	0	0	0	0	B
148	9	d148s9	A gentleman.	Gentleman.	Džentlmen.	Džentlmen.	1	1	1	1	0	0	0	0	0	0	0	0	0	0	1	0	0	0	-1	-1	-1	-1	0	1	0	0	0	B
148	10	d148s10	He stood up and greeted me with a kiss.	Vstal a pozdravil ma bozkom.	Vstal a pozdravil ma bozkom.	Postavil sa a privítal ma s bozkom.	0.571	0.571	0.571	0.571	0.429	0.42	0	0	0	0.571	0.571	0.571	0.571	0.429	0.42	0	0	0	0	0	0	0	0	0	0	0	0	B
148	11	d148s11	What did you talk about?	Čo ste sa rozprávali?	O čom ste sa rozprávali?	O čom ste sa rozprávali?	0.4	0.4	0.4	0.4	0.2	0.6	0.53	0.4	0	0	0	0	0	0	1	1	1	1	-0.4	-0.4	-0.4	-0.4	-0.2	0.4	0.47	0.6	1	B
148	12	d148s12	Melbourne, where I’m from, being close to our families, our similar jobs, and travel.	Melbourne, odkiaľ som, že v blízkosti našich rodín, našich obdobných pracovných miest a cestovanie.	O Melbourne, odkiaľ som, o blízkosti našich rodín, našich podobných pracovných miestach a cestovaní.	O Melbourne, meste, odkiaľ pochádzam, o rodinách, o našich podobných prácach a o cestovaní.	0.714	0.929	0.929	0.929	0.786	0.35	0	0	0	0.286	0.571	0.571	0.571	0.571	0.64	0.15	0	0	-0.428	-0.358	-0.358	-0.358	-0.215	0.29	0.15	0	0	B
148	13	d148s13	Any awkward moments?	Akékoľvek nevhodné momenty?	Akékoľvek nevhodné momenty?	Nejaké trápne chvíle?	1	1	1	1	0.667	0	0	0	0	1	1	1	1	0.667	0	0	0	0	0	0	0	0	0	0	0	0	0	B
148	14	d148s14	No, he’s a smooth talker.	Nie, je to hladké rečník.	Nie, je to hladký rečník.	Neboli žiadne, rozprávalo sa s ním skvelo.	1	1	1	1	0.857	0	0	0	0	1	1	1	1	0.857	0	0	0	0	0	0	0	0	0	0	0	0	0	B
148	15	d148s15	Good table manners?	Dobré stolovanie?	Dobré stolovanie?	Správal sa pri stole slušne?	1	1	1	1	0.8	0	0	0	0	1	1	1	1	0.8	0	0	0	0	0	0	0	0	0	0	0	0	0	B
148	16	d148s16	Yes – and a good sharer.	Áno - a dobrý zdieľa.	Áno - a rád sa delí.	Áno a rád sa podelí.	0.6	0.8	0.8	0.8	0.8	0.4	0	0	0	0.4	0.4	0.4	0.4	0.4	0.66	0.4	0.25	0	-0.2	-0.4	-0.4	-0.4	-0.4	0.26	0.4	0.25	0	B
148	17	d148s17	Best thing about Ed?	Najlepšia vec, o Eda?	Najlepšia vec na Edovi?	Najlepšia vec na Edovi?	0.5	0.5	0.5	0.5	0.5	0.5	0.33	0	0	0	0	0	0	0	1	1	1	1	-0.5	-0.5	-0.5	-0.5	-0.5	0.5	0.67	1	1	B
148	18	d148s18	Good fun: he asked lots of questions.	Dobrá zábava: opýtal sa veľa otázok.	Dobrá zábava: opýtal sa veľa otázok.	Je zábavný, veľa sa pýtal.	0.8	1	1	1	0.8	0.33	0	0	0	0.8	1	1	1	0.8	0.33	0	0	0	0	0	0	0	0	0	0	0	0	B
148	19	d148s19	He’s endearing and conversation flowed.	Je to roztomilé a konverzácie plynula.	Je roztomilý a konverzácia plynula.	Je milý a rozhovor prebiehal hladko.	0.667	0.833	0.833	0.833	0.833	0.33	0	0	0	0.667	0.667	0.667	0.667	0.667	0.33	0	0	0	0	-0.166	-0.166	-0.166	-0.166	0	0	0	0	B
148	20	d148s20	Would you introduce him to your friends?	Chceli by ste ho predstaviť svojim priateľom?	Chceli by ste ho predstaviť svojim priateľom?	Predstavila by si ho svojím kamarátom?	0.833	0.833	0.833	0.833	0.667	0.28	0	0	0	0.833	0.833	0.833	0.833	0.667	0.28	0	0	0	0	0	0	0	0	0	0	0	0	B
148	21	d148s21	Yes, I think so.	Áno Myslím si.	Áno, myslím si.	Asi áno.	1	1	1	1	1	0.33	0	0	0	1	1	1	1	1	0.33	0	0	0	0	0	0	0	0	0	0	0	0	B
148	22	d148s22	Describe Ed in three words	Popísať Ed tromi slovami	Popíš Eda tromi slovami	Opíš Eda troma slovami.	1	1	1	1	0.75	0	0	0	0	0.75	0.75	0.75	0.75	0.5	0.25	0	0	0	-0.25	-0.25	-0.25	-0.25	-0.25	0.25	0	0	0	B
148	23	d148s23	Confident, smooth, gentlemanly.	Verí, hladký, gentleman.	Sebavedomý, hladký, džentlmen.	Sebavedomý, priateľský, džentlmen.	1	1	1	1	0.667	0	0	0	0	0.333	0.333	0.333	0.333	0.333	0.66	0	0	0	-0.667	-0.667	-0.667	-0.667	-0.334	0.66	0	0	0	B
148	24	d148s24	What do you think he made of you?	Čo si myslíte, že z vás?	Čo si myslíš, ako sa bavil?	Čo si myslíš, ako si na neho zapôsobila?	0.625	0.75	0.75	0.75	0.75	0.25	0.15	0	0	0.375	0.5	0.5	0.5	0.5	0.5	0.45	0.37	0.25	-0.25	-0.25	-0.25	-0.25	-0.25	0.25	0.3	0.37	0.25	B
148	25	d148s25	We’ve been in touch since, so I think he enjoyed himself.	Boli sme v kontakte od tej doby, takže myslím, že bavil.	Boli sme v kontakte od tej doby, takže myslím, že sa bavil.	Odvtedy sme boli v kontakte, takže si myslím, že si to užil.	0.417	0.75	0.75	0.75	0.5	0.58	0.18	0	0	0.417	0.75	0.75	0.75	0.5	0.58	0.18	0	0	0	0	0	0	0	0	0	0	0	B
148	26	d148s26	Did you go on somewhere?	Vedeli ste ísť niekam?	Išli ste ešte niekam?	Išli ste potom niekam?	0.5	0.5	0.5	0.5	0.25	0.5	0	0	0	0.25	0.25	0.25	0.25	0.25	0.75	0.33	0	0	-0.25	-0.25	-0.25	-0.25	0	0.25	0.33	0	0	B
148	27	d148s27	To a nearby pub for a couple more drinks.	Do neďalekej krčmy na pár ďalších nápojov.	Do neďalekej krčmy na pár ďalších nápojov.	Do blízkej krčmy na niekoľko ďalších drinkov.	0.429	0.429	0.429	0.429	0.429	0.57	0.16	0	0	0.429	0.429	0.429	0.429	0.429	0.57	0.16	0	0	0	0	0	0	0	0	0	0	0	B
148	28	d148s28	And… did you kiss?	A ... si pobozkať?	A ... pobozkali ste sa?	A... pobozkali ste sa?	0.75	0.75	0.75	0.75	0.75	0.25	0	0	0	0.25	0.25	0.25	0.25	0.25	0.8	0.5	0.33	0	-0.5	-0.5	-0.5	-0.5	-0.5	0.55	0.5	0.33	0	B
148	29	d148s29	Just on the cheek.	Len na tvár.	Len na tvár.	Len na líce.	0.333	0.333	0.333	0.333	0.333	0.66	0.5	0	0	0.333	0.333	0.333	0.333	0.333	0.66	0.5	0	0	0	0	0	0	0	0	0	0	0	B
148	30	d148s30	If you could change one thing about the evening, what would it be?	Ak by ste mohli zmeniť jednu vec o večeru, čo by to bolo?	Ak by ste mohli zmeniť jednu vec na večeri, čo by to bolo?	Ak by si mohla zmeniť jednu vec na tomto večeri, čo by to bolo?	0.357	0.357	0.357	0.357	0.357	0.64	0.46	0.25	0.09	0.214	0.214	0.214	0.214	0.214	0.78	0.61	0.42	0.27	-0.143	-0.143	-0.143	-0.143	-0.143	0.14	0.15	0.17	0.18	B
148	31	d148s31	Nothing – it was lots of fun.	Nič - to bola kopa zábavy.	Nič - bola to kopa zábavy.	Nič, skvele som sa bavila.	1	1	1	1	1	0	0	0	0	1	1	1	1	1	0	0	0	0	0	0	0	0	0	0	0	0	0	B
148	32	d148s32	Marks out of 10?	Označí z 10?	Známka z 10?	Koľko bodov z 10 mu dávaš?	0.667	0.667	0.667	0.667	0.5	0.33	0.25	0	0	0.667	0.667	0.667	0.667	0.5	0.33	0.25	0	0	0	0	0	0	0	0	0	0	0	B
148	33	d148s33	7.	7.	7.	7.	0	0	0	0	0	1	0	0	0	0	0	0	0	0	1	0	0	0	0	0	0	0	0	0	0	0	0	B
148	34	d148s34	Would you meet again?	Chceli by ste stretnúť znova?	Chceli by ste stretnúť znova?	Stretla by si sa s ním znova?	0.714	0.714	0.714	0.714	0.571	0.28	0	0	0	0.714	0.714	0.714	0.714	0.571	0.28	0	0	0	0	0	0	0	0	0	0	0	0	B
148	35	d148s35	Yes, we already have.	Áno, už máme.	Áno, už sme sa.	Áno, už sme sa vlastne stretli.	0.667	0.667	0.667	0.667	0.667	0.33	0.25	0	0	0.333	0.333	0.333	0.333	0.333	0.66	0.66	0.66	0.66	-0.334	-0.334	-0.334	-0.334	-0.334	0.33	0.41	0.66	0.66	B
148	36	d148s36	Ed on Dominique	Ed na Dominique	Ed o Dominique	Ed o Dominique	0.333	0.333	0.333	0.333	0.333	0.66	0	0	0	0	0	0	0	0	1	1	1	0	-0.333	-0.333	-0.333	-0.333	-0.333	0.34	1	1	0	B
148	37	d148s37	What were you hoping for?	Čo ste dúfali?	Čo ste dúfali?	Čo si očakával?	0.667	0.667	0.667	0.667	0.667	0.33	0	0	0	0.667	0.667	0.667	0.667	0.667	0.33	0	0	0	0	0	0	0	0	0	0	0	0	B
148	38	d148s38	A fun night out with a great girl: both boxes ticked.	Zábava večer s veľkým dievčaťom: zaškrtnutá obe políčka.	Zábavný večer so skvelým dievčaťom: obe veci sa splnili.	Večer plný zábavy so skvelým dievčaťom, obe sa splnili.	0.778	0.889	0.889	0.889	0.778	0.22	0	0	0	0.333	0.556	0.556	0.556	0.444	0.66	0.25	0	0	-0.445	-0.333	-0.333	-0.333	-0.334	0.44	0.25	0	0	B
148	39	d148s39	First impressions?	Prvé dojmy?	Prvé dojmy?	Prvé dojmy?	0	0	0	0	0	1	1	0	0	0	0	0	0	0	1	1	0	0	0	0	0	0	0	0	0	0	0	B
148	40	d148s40	Pretty, friendly and kind.	Pekný, priateľský a milý.	Pekná, priateľská a milá.	Pekná, priateľská a milá.	0.75	0.75	0.75	0.75	0.5	0.25	0	0	0	0	0	0	0	0	1	1	1	1	-0.75	-0.75	-0.75	-0.75	-0.5	0.75	1	1	1	B
148	41	d148s41	What did you talk about?	Čo ste sa rozprávali?	O čom ste sa rozprávali?	O čom ste sa rozprávali?	0.4	0.4	0.4	0.4	0.2	0.6	0.53	0.4	0	0	0	0	0	0	1	1	1	1	-0.4	-0.4	-0.4	-0.4	-0.2	0.4	0.47	0.6	1	B
148	42	d148s42	Sport, photography, music.	Šport, fotografie, hudba.	O športe, fotografiách, hudbe.	O športe, fotografovaní, hudbe.	1	1	1	1	0.75	0	0	0	0	0.25	0.25	0.25	0.25	0.25	0.75	0.33	0	0	-0.75	-0.75	-0.75	-0.75	-0.5	0.75	0.33	0	0	B
148	43	d148s43	She has excellent chit-chat.	Má vynikajúce rozprávanie.	Má vynikajúce rozprávanie.	Bolo super sa s ňou baviť.	1	1	1	1	0.833	0	0	0	0	1	1	1	1	0.833	0	0	0	0	0	0	0	0	0	0	0	0	0	B
148	44	d148s44	Any awkward moments?	Akékoľvek nevhodné momenty?	Akékoľvek nevhodné momenty?	Nejaké trápne chvíľky?	1	1	1	1	0.667	0	0	0	0	1	1	1	1	0.667	0	0	0	0	0	0	0	0	0	0	0	0	0	B
148	45	d148s45	None at all.	Vôbec nie.	Vôbec nie.	Absolútne žiadne.	1	1	1	1	0.5	0	0	0	0	1	1	1	1	0.5	0	0	0	0	0	0	0	0	0	0	0	0	0	B
148	46	d148s46	Good table manners?	Dobré stolovanie?	Dobré stolovanie?	Dobre sa správala pri stole?	1	1	1	1	0.8	0	0	0	0	1	1	1	1	0.8	0	0	0	0	0	0	0	0	0	0	0	0	0	B
148	47	d148s47	Her use of chopsticks was exemplary.	Jej používanie paličiek bolo príkladné.	Jej používanie paličiek bolo príkladné.	Vie ukážkovo používať paličky.	1	1	1	1	1	0	0	0	0	1	1	1	1	1	0	0	0	0	0	0	0	0	0	0	0	0	0	B
148	48	d148s48	Best thing about Dominique?	Najlepšia vec, o Dominique?	Najlepšia vec na Dominique?	Najlepšia vec na Dominique?	0.25	0.25	0.25	0.25	0.25	0.75	0.33	0	0	0	0	0	0	0	1	1	1	1	-0.25	-0.25	-0.25	-0.25	-0.25	0.25	0.67	1	1	B
148	49	d148s49	Her ability to talk about myriad subjects with infectious grace and enthusiasm.	Jej schopnosť hovoriť o nespočetných pacientov s infekčnou milosť a nadšenie.	Jej schopnosť hovoriť o nespočetných témach s nákazlivým pôvabom a entuziazmom.	Jej schopnosť hovoriť o mnohých veciach s obrovským pôvabom a entuziazmom.	0.455	0.455	0.455	0.455	0.455	0.54	0.3	0.22	0.12	0.273	0.273	0.273	0.273	0.273	0.72	0.5	0.33	0.12	-0.182	-0.182	-0.182	-0.182	-0.182	0.18	0.2	0.11	0	B
148	50	d148s50	Would you introduce her to your friends?	Chceli by ste ju predstaviť svojim priateľom?	Chceli by ste ju predstaviť svojim priateľom?	Predstavil by si ju svojim kamarátom?	0.667	0.667	0.667	0.667	0.5	0.42	0	0	0	0.667	0.667	0.667	0.667	0.5	0.42	0	0	0	0	0	0	0	0	0	0	0	0	B
148	51	d148s51	Absolutely – they’d love her.	Absolútne - že by ju rád.	Určite - páčila by sa im.	Určite, páčila by sa im.	1	1	1	1	0.8	0.16	0	0	0	0.4	0.4	0.4	0.4	0.2	0.66	0.6	0.5	0.33	-0.6	-0.6	-0.6	-0.6	-0.6	0.5	0.6	0.5	0.33	B
148	52	d148s52	Describe Dominique in three words	Popísať Dominique tromi slovami	Opíš Dominique tromi slovami	Opíš Dominique tromi slovami.	0.5	0.5	0.5	0.5	0.25	0.5	0.33	0	0	0.25	0.25	0.25	0.25	0.25	0.75	0.66	0.5	0	-0.25	-0.25	-0.25	-0.25	0	0.25	0.33	0.5	0	B
148	53	d148s53	Super, super, cool.	Super, super, super.	Super, super, cool.	Super, super, skvelá.	0.333	0.333	0.333	0.333	0.333	1	1	0	0	0.333	0.333	0.333	0.333	0.333	0.66	0.5	0	0	0	0	0	0	0	-0.34	-0.5	0	0	B
148	54	d148s54	What do you think she made of you?	Čo myslíš, že z vás?	Čo myslíš, ako sa bavila?	Čo si myslíš, ako si na ňu zapôsobil?	0.75	0.75	0.75	0.75	0.75	0.25	0	0	0	0.625	0.625	0.625	0.625	0.625	0.37	0.15	0	0	-0.125	-0.125	-0.125	-0.125	-0.125	0.12	0.15	0	0	B
148	55	d148s55	You’ll have to ask her.	Budete sa musieť spýtať jej.	Budete sa musieť spýtať jej.	To sa musíte spýtať jej.	0.4	0.4	0.4	0.4	0.2	0.6	0.25	0	0	0.4	0.4	0.4	0.4	0.2	0.6	0.25	0	0	0	0	0	0	0	0	0	0	0	B
148	56	d148s56	Did you go on somewhere?	Vedeli ste ísť niekam?	Išli ste ešte niekam?	Išli ste potom niekam?	0.5	0.5	0.5	0.5	0.25	0.5	0	0	0	0.25	0.25	0.25	0.25	0.25	0.75	0.33	0	0	-0.25	-0.25	-0.25	-0.25	0	0.25	0.33	0	0	B
148	57	d148s57	To a pub for a couple more.	Do krčmy pre pár ďalších.	Do krčmy na pár ďalších.	Do jednej krčmy na pár ďalších drinkov.	0.429	0.429	0.429	0.429	0.429	0.57	0.17	0	0	0.286	0.286	0.286	0.286	0.286	0.71	0.53	0.47	0.35	-0.143	-0.143	-0.143	-0.143	-0.143	0.14	0.36	0.47	0.35	B
148	58	d148s58	And… did you kiss?	A ... si pobozkať?	A ... pobozkali ste sa?	A... pobozkali ste sa?	0.75	0.75	0.75	0.75	0.75	0.25	0	0	0	0.25	0.25	0.25	0.25	0.25	0.8	0.5	0.33	0	-0.5	-0.5	-0.5	-0.5	-0.5	0.55	0.5	0.33	0	B
148	59	d148s59	A peck on the cheek.	Pobozkal na tvár.	Letmý bozk na líce.	Len letmo na líca.	0.75	0.75	0.75	0.75	0.5	0.25	0	0	0	0.75	0.75	0.75	0.75	0.5	0.25	0	0	0	0	0	0	0	0	0	0	0	0	B
148	60	d148s60	If you could change one thing about the evening, what would it be?	Ak by ste mohli zmeniť jednu vec o večeru, čo by to bolo?	Ak by ste mohli zmeniť jednu vec na večeri, čo by to bolo?	Ak by si mohol zmeniť jednu vec na tomto večeri, čo by to bolo?	0.357	0.357	0.357	0.357	0.357	0.64	0.46	0.25	0.09	0.214	0.214	0.214	0.214	0.214	0.78	0.61	0.42	0.27	-0.143	-0.143	-0.143	-0.143	-0.143	0.14	0.15	0.17	0.18	B
148	61	d148s61	Absolutely nothing.	Absolútne nič.	Absolútne nič.	Vôbec nič.	0.5	0.5	0.5	0.5	0	0.5	0	0	0	0.5	0.5	0.5	0.5	0	0.5	0	0	0	0	0	0	0	0	0	0	0	0	B
148	62	d148s62	I had a brilliant time.	Mal som skvelý čas.	Bolo to skvelé.	Skvele som sa bavil.	0.75	0.75	0.75	0.75	0.5	0.25	0	0	0	1	1	1	1	0.75	0	0	0	0	0.25	0.25	0.25	0.25	0.25	-0.25	0	0	0	B
148	63	d148s63	Marks out of 10?	Označí z 10?	Známka z 10?	Koľko bodov z 10 jej dávaš?	0.667	0.667	0.667	0.667	0.5	0.33	0.25	0	0	0.667	0.667	0.667	0.667	0.5	0.33	0.25	0	0	0	0	0	0	0	0	0	0	0	B
148	64	d148s64	10.	10.	10.	10.	0	0	0	0	0	1	0	0	0	0	0	0	0	0	1	0	0	0	0	0	0	0	0	0	0	0	0	B
148	65	d148s65	Would you meet again?	Chceli by ste stretnúť znova?	Chceli by ste stretnúť znova?	Stretol by si sa s ňou znova?	0.714	0.714	0.714	0.714	0.571	0.28	0	0	0	0.714	0.714	0.714	0.714	0.571	0.28	0	0	0	0	0	0	0	0	0	0	0	0	B
148	66	d148s66	For sure.	Pre istotu.	Istotne.	Určite.	1	1	1	1	1	0	0	0	0	1	1	1	1	0	0	0	0	0	0	0	0	0	-1	0	0	0	0	B
149	1	d149s1	Is the gym the best place to exercise?	Je telocvičňa je najlepším miestom na výkon?	Je posilňovňa najlepším miestom na cvičenie?	Je posilňovňa najlepším miestom na cvičenie?	0.5	0.5	0.5	0.5	0.5	0.71	0.33	0.2	0	0	0	0	0	0	1	1	1	1	-0.5	-0.5	-0.5	-0.5	-0.5	0.29	0.67	0.8	1	E
149	2	d149s2	A new study says gym-goers are indeed fitter and healthier than non-members.	Nová štúdia hovorí, telocvičňa diváci sú skutočne lepšej kondícii a zdravšie ako nečlenov.	Nová štúdia hovorí, že návštevníci posilňovní sú skutočne v lepšej kondícii a zdravší ako nečlenovia.	Podľa novej štúdie sú návštevníci posilňovní v skutočnosti zdravší ako tí, ktorí posilňovňu nenavštevujú.	0.857	1	1	1	0.857	0.14	0	0	0	0.643	0.929	0.929	0.929	0.714	0.4	0.14	0	0	-0.214	-0.071	-0.071	-0.071	-0.143	0.26	0.14	0	0	E
149	3	d149s3	But there are other ways to stay fit, and some of them may be even more beneficial.	Existujú však aj iné spôsoby, ako zostať fit, a niektoré z nich môžu byť dokonca výhodnejšie.	Existujú však aj iné spôsoby, ako zostať fit, a niektoré z nich môžu byť dokonca výhodnejšie.	Existujú aj iné spôsoby ako ostať vo forme a niekedy prinášajú dokoncia viac úžitku.	0.714	0.786	0.786	0.786	0.714	0.37	0.2	0.14	0.07	0.714	0.786	0.786	0.786	0.714	0.37	0.2	0.14	0.07	0	0	0	0	0	0	0	0	0	E
149	4	d149s4	The most popular New Year resolution in almost every survey is “exercise more” – which often translates into joining a gym.	Najpopulárnejší rozlíšenie Nový rok v takmer každej prieskumu je "vykonávať viac" - čo sa často prekladá do vstupu do posilňovne.	Najpopulárnejším predsavzatím na Nový rok takmer v každom prieskumu je viacej cvičiť - čo sa často prekladá ako vstup do posilňovne.	V každom prieskume je najpopulárnejším novoročným predsavzatím viacej cvičiť. Väčšinou sa tým chápe návšteva posilňovne.	1	1	1	1	0.867	0.2	0	0	0	0.867	1	1	1	0.733	0.4	0.09	0	0	-0.133	0	0	0	-0.134	0.2	0.09	0	0	E
149	5	d149s5	According to the 2016 State of the UK Fitness Industry report, one in seven people in the UK are members.	Podľa 2016 štátu správy UK fitness priemyslu, jeden zo siedmich ľudí vo Veľkej Británii sú členmi.	Podľa správy UK fitness priemyslu z roku 2016, jeden zo siedmich ľudí vo Veľkej Británii je členom posilňovne.	Podľa správy Stavu fitnes priemyslu v Spojenom Kráľovstve je jeden zo siedmych obyvateľov členom posilňovne.	0.688	0.938	0.938	0.938	0.813	0.31	0.06	0	0	0.625	0.813	0.813	0.813	0.625	0.44	0.17	0	0	-0.063	-0.125	-0.125	-0.125	-0.188	0.13	0.11	0	0	E
149	6	d149s6	But are they more likely to be fit?	Ale sú viac pravdepodobné, že bude fit?	Ale je pravdepodobnejšie, že budú v lepšej forme?	Sú však v lepšej forme?	1	1	1	1	1	0.14	0	0	0	1	1	1	1	0.4	0.37	0.28	0.16	0	0	0	0	0	-0.6	0.23	0.28	0.16	0	E
149	7	d149s7	The solution	Riešenie	Riešenie	Riešenie	0	0	0	0	0	1	0	0	0	0	0	0	0	0	1	0	0	0	0	0	0	0	0	0	0	0	0	E
149	9	d149s9	Gym members, on average, did six hours more exercise a week, and this activity did make them fitter than non-members.	Členovia Posilňovňa, v priemere, robil šesť hodín viac cvičiť týždenne, a táto činnosť však, aby boli lepšie kondícii než nečlenov.	Členovia posilňovňa, v priemere, cvičili týždenne o šesť hodín viac a vďaka tomu boli v lepšej kondícii než nečlenovia.	Členovia cvičia do týždňa v priemere o 6 hodín via, čo spôsobuje, že sú v lepšej forme.	0.882	1	1	1	0.824	0.2	0.05	0	0	0.765	0.882	0.882	0.882	0.706	0.35	0.1	0	0	-0.117	-0.118	-0.118	-0.118	-0.118	0.15	0.05	0	0	E
149	10	d149s10	They had lower heart-rates, smaller waists and higher levels of cardiovascular fitness as measured by heart strength, lung function and muscle mass.	Mali nižšie srdcovej sadzby, menšie pasy a vyššej úrovne kardiovaskulárne meraná srdcovej sily, funkcia pľúc a svalovej hmoty.	Mali nižší tep srdca, užší pás a vyššie hodnoty kardiovaskulárnej zdatnosti meranou silou srdca, funkčnosť pľúc a svalovej hmoty.	Mali nižšiu srdečnú frekvenciu, užší pás, výššiu hladinu kardiovaskulárnej zdatnosti meranou silou srdca, funkčnosť pľúc a svalovej hmoty.	0.722	0.722	0.722	0.722	0.722	0.33	0.17	0.12	0.06	0.333	0.333	0.333	0.333	0.333	0.78	0.55	0.47	0.43	-0.389	-0.389	-0.389	-0.389	-0.389	0.45	0.38	0.35	0.37	E
149	11	d149s11	They also spent less time sitting down every day than non-gym members.	Oni tiež strávil menej času v sede každý deň ako členovia non-telocvični.	Tiež každý deň strávili menej času v sede ako nečlenovia posilňovne.	Taktiež strávia menej času sedením ako nečlenovia posilňovní.	1	1	1	1	0.75	0.25	0.09	0	0	0.875	0.875	0.875	0.875	0.625	0.36	0.2	0	0	-0.125	-0.125	-0.125	-0.125	-0.125	0.11	0.11	0	0	E
149	12	d149s12	The results were similar for men and women.	Výsledky boli podobné pre mužov a ženy.	Výsledky boli podobné pre mužov a ženy.	Výsledky sú rovnaké pre mužov ako aj pre ženy.	0.444	0.556	0.556	0.556	0.556	0.44	0.12	0	0	0.444	0.556	0.556	0.556	0.556	0.44	0.12	0	0	0	0	0	0	0	0	0	0	0	E
149	13	d149s13	The study included 405 people between the ages of 30 to 64, and the general characteristics of those who were gym members were similar to those who were not.	Do štúdie bolo zahrnutých 405 ľudí vo veku 30 až 64 rokov medzi a všeobecné charakteristiky tých, ktorí boli členmi telocvični boli podobné tým, ktorí neboli.	Do štúdie bolo zahrnutých 405 ľudí vo veku 30 až 64 rokov a všeobecné charakteristiky tých, ktorí boli členmi telocvični boli podobné nečlenom.	Štúdia zahŕňa 405 ľudí vo veku od 30 do 64 rokov. Všeobecná charakteristika členov posilňovní bola podobná jej nečlenom.	0.947	1	1	1	0.684	0.3	0.16	0.08	0.04	0.737	0.842	0.842	0.842	0.632	0.39	0.18	0.09	0.05	-0.21	-0.158	-0.158	-0.158	-0.052	0.09	0.02	0.01	0.01	E
149	14	d149s14	The lead author, Elizabeth C Schroeder of the department of kinesiology and nutrition at the University of Illinois, says that gym members were also more likely than non-members – even those who did exercise – to do resistance training which strengthens muscles, reduces blood pressure and can increase metabolic rates.	Vedúci autor, Elizabeth C Schroeder katedry kineziológie a výživy na University of Illinois, hovorí, že členovia telocvične boli tiež častejšie ako nečlenom - dokonca aj tí, kto robil cvičenie - robiť cvičenia so záťažou, ktorá posilňuje svalstvo, znižuje krvný tlak a môže zvýšiť rýchlosti metabolizmu.	Vedúca autora, Elizabeth C Schroederová z katedry kineziológie a výživy z University of Illinois, hovorí, že členovia telocvične ako nečlenovia, dokonca aj tí, ktorí cvičili, zvládali lepšie cvičenia so záťažou, ktoré posilňujú svalstvo, znižujú krvný tlak a môže zvýšiť rýchlosť metabolizmu.	Vedúca autorka Elizabeth C Schroederová z oddelenia kineziológie a výživy na Univerzite v Illinois povedala, že členovia oproti nečlenom posilňovní, aj tým cvičiacim, zvládli lepšie odporovacie cvičenia, ktoré posilňujú svaly, znižujú krvný tlak a môžu zvýšiť rýchlosť metabolizmu.	0.737	0.763	0.763	0.763	0.632	0.37	0.15	0.06	0.02	0.553	0.579	0.579	0.579	0.5	0.54	0.27	0.14	0.04	-0.184	-0.184	-0.184	-0.184	-0.132	0.17	0.12	0.08	0.02	E
149	15	d149s15	While it might seem obvious that gym members exercise more, and are healthier than non-members, Schroeder says this has not previously been explicitly shown.	Aj keď by sa mohlo zdať zrejmé, že členovia telocvičňa viac cvičiť, a sú zdravšie ako nečlenom Schroeder hovorí, že to doteraz nebola jednoznačne preukázané.	Aj keď by sa mohlo zdať zrejmé, že členovia posilňovne cvičia a sú zdravší ako nečlenovia hovorí Schoederová, no doteraz to nebolo preukázané .	Schoederová sa vyjadrila, že aj keď môže byť zrejmé, že členovia cvičia viac a sú zdravší ako nečlenovia, nie je to zreteľne dokázané.	0.565	0.826	0.826	0.826	0.739	0.48	0.16	0.04	0	0.391	0.739	0.739	0.739	0.652	0.58	0.3	0.18	0.09	-0.174	-0.087	-0.087	-0.087	-0.087	0.1	0.14	0.14	0.09	E
149	17	d149s17	However, the study is only designed to show a link between gym membership and more exercise – it may be that active people are just more likely to join gyms.	Štúdia však je len na ukázať súvislosť medzi členstvo v telocvični a viac výkonu - to môže byť, že aktívni ľudia sú proste viac pravdepodobné, že pripojiť telocvične.	Štúdia má ukázať súvislosť medzi členstvo v telocvični a väčším výkonom- to môže byť, že aktívni ľudia sa pravdepodobnejšie stanú členmi posilňovne.	Avšak, štúdia je navrhnutá tak, aby poukázala na spojitosť medzi členmi posilňovne a častejším cvičením. Môže to byť tým, že aktívni ľudia sa s najväčšou pravdepodobnosťou stanú členmi posilňovní.	0.621	0.793	0.793	0.793	0.759	0.41	0.07	0.03	0	0.517	0.69	0.69	0.69	0.655	0.44	0.18	0.07	0.03	-0.104	-0.103	-0.103	-0.103	-0.104	0.03	0.11	0.04	0.03	E
149	18	d149s18	People in the study who exercised as much as gym members had similar reductions in cardiovascular risk factors.	Ľudia v štúdii, ktoré vykonávali rovnako ako členovia telocvičňa mali podobné zníženie rizikových faktorov kardiovaskulárnych ochorení.	Ľudia v štúdii, ktorí cvičili rovnako ako členovia telocvičňa mali podobné zníženie rizikových faktorov kardiovaskulárnych ochorení.	Ľudia, ktorí sa zúčastnili štúdie a cvičia rovnako ako členovia posilňovní, mali podobné zníženie kardiovaskulárnych rizikových faktorov.	0.412	0.588	0.588	0.588	0.529	0.58	0.31	0.13	0	0.353	0.588	0.588	0.588	0.529	0.64	0.31	0.13	0	-0.059	0	0	0	0	0.06	0	0	0	E
149	19	d149s19	You can get broadly the same benefit wherever you exercise.	Môžete získať zhruba rovnakú výhodu všade tam, kde cvičíte.	Môžete získať zhruba rovnaké výhody, než už cvičíte kdekoľvek.	Všeobecne dosiahnete tie isté výhody, nech už cvičíte kdekoľvek.	0.889	1	1	1	0.889	0.11	0	0	0	0.556	0.556	0.556	0.556	0.444	0.44	0.25	0.14	0	-0.333	-0.444	-0.444	-0.444	-0.445	0.33	0.25	0.14	0	E
149	20	d149s20	This study shows a gym membership makes it more likely you’ll do so, but other research shows that exercising outside has other benefits.	Táto štúdia ukazuje členstvo v telocvični robí to viac pravdepodobné, že ak budete tak urobiť, ale ďalší výskum ukazuje, že cvičenie vonku má aj ďalšie výhody.	Táto štúdia ukazuje, že členovia posilňovní dosiahnú pravdepodobnejšie, ale ďalší výskum zas ukazuje, že cvičenie vonku má aj ďalšie výhody.	Táto štúdia poukazuje na to, že členovia ich dosiahnu pravdepodobnejšie ako vy. Iná štúdia zas tvrdí, že cvičenie vonku má iné výhody.	0.727	0.818	0.818	0.818	0.727	0.34	0.16	0.08	0.04	0.455	0.545	0.545	0.545	0.545	0.5	0.23	0.1	0.05	-0.272	-0.273	-0.273	-0.273	-0.182	0.16	0.07	0.02	0.01	E
149	21	d149s21	Outdoor activity can boost your vitamin D levels, reduce tension and depression, and make you feel more revitalised and positive about life – especially if you run through a forest.	Outdoorové aktivity môžu zvýšiť hladinu vitamínu D, znížiť napätie a depresiou, a budete cítiť oživený a pozitívne o živote - najmä ak sa dostanete lesom.	Outdoorové aktivity môžu zvýšiť hladinu vitamínu D, znížiť napätie, depresiu a budete sa cítiť sviežejšie pozitívnejšie voči životu- najmä ak beháte lesom.	Vonkajšie aktivity zvýšia úroveň vitamínu D, znížia napätie a depresie a budete sa cítiť živší a optimistickejší. To platí najmä ak beháte cez les.	0.542	0.625	0.625	0.625	0.583	0.48	0.16	0	0	0.458	0.583	0.583	0.583	0.542	0.45	0.26	0.13	0.04	-0.084	-0.042	-0.042	-0.042	-0.041	-0.03	0.1	0.13	0.04	E
149	22	d149s22	Outdoor exercise is also rated as more enjoyable and less of an effort than going to the gym.	Vonkajšie cvičenie je tiež hodnotená ako príjemnejšie a menej úsilia, než chodiť do posilňovne.	Vonkajšie cvičenie je tiež príjemnejšie a vynaložíte menej úsilia, než chodiť do posilňovne.	Vonkajšie aktivity sú považované za zábavnejšie a treba na ne vynaložiť menej úsilia ako keď idete do posilňovne.	0.611	0.722	0.722	0.722	0.722	0.38	0.11	0	0	0.667	0.667	0.667	0.667	0.667	0.33	0.12	0	0	0.056	-0.055	-0.055	-0.055	-0.055	-0.05	0.01	0	0	E
149	23	d149s23	The first five minutes of outdoor exercise are particularly effective at making people feel good.	Prvých päť minút pohybu na čerstvom vzduchu sú obzvlášť účinné na to, aby sa ľudia cítili dobre.	Prvých päť minút pohybu na čerstvom vzduchu sú obzvlášť účinné na to, aby sa ľudia cítili dobre.	Za prvých päť minút vonkajšieho cvičenia sa nám zlepší nálada.	1	1	1	1	0.7	0.23	0.12	0.06	0	1	1	1	1	0.7	0.23	0.12	0.06	0	0	0	0	0	0	0	0	0	0	E
149	24	d149s24	But Schroeder says that a gym may also encourage greater exercise because it can be social and fun.	Ale Schroeder hovorí, že telocvičňa môže tiež podporiť väčší výkon, pretože to môže byť sociálne a zábavné.	No Schroederová hovorí, že posilňovne môže tiež podporiť väčší výkon, pretože sme v spoločnosti a je to zábava.	Schroederová však tvrdí, že posilňovňa nás podnecuje k lepšiemu výkonu, pretože sme v spoločnosti a je to zábava.	0.778	0.889	0.889	0.889	0.833	0.22	0	0	0	0.444	0.5	0.5	0.5	0.444	0.55	0.41	0.37	0.33	-0.334	-0.389	-0.389	-0.389	-0.389	0.33	0.41	0.37	0.33	E
150	1	d150s1	Gemüse ist mein Fleisch	Zelenina ist mein Fleisch	Zelenina ist moje mäso	Zelenina je moje mäso	0.75	0.75	0.75	0.75	0.75	0.25	0	0	0	0.25	0.25	0.25	0.25	0.25	0.75	0.33	0	0	-0.5	-0.5	-0.5	-0.5	-0.5	0.5	0.33	0	0	C
150	2	d150s2	Wer Muskeln bekommen will, braucht Eiweiß, so viel ist sicher.	Wer Muskeln bekommen vôle, braucht Eiweiß, takže viel ist sicher.	Kto chce svaly, potrebuje bielkoviny, toľko je isté.	Každý, kto chce mať svaly potrebuje bielkoviny, aspoň toľko je isté.	1	1	1	1	0.909	0	0	0	0	0.273	0.273	0.273	0.273	0.273	0.72	0.51	0.24	0	-0.727	-0.727	-0.727	-0.727	-0.636	0.72	0.51	0.24	0	C
150	3	d150s3	Doch welche Proteine erzeugen mehr Wachstum - die aus tierischen oder pflanzlichen Quellen Forscher haben nun eine Antwort gefunden.	Doch Welcha Proteine ??erzeugen mehr Wachstum - die aus tierischen oder pflanzlichen Quellen Forscher haben eine nun Antwort gefunden.	Ale z ktorých proteínov sa dosiahne väčší rast - z rastlinných alebo živočíšnych zdrojov? Vedci už našli odpoveď.	Ale z ktorých proteínov sa dosiahne väčší rast - z rastlinných alebo živočíšnych zdrojov? Vedci už našli odpoveď.	1	1	1	1	0.944	0.05	0	0	0	0	0	0	0	0	1	1	1	1	-1	-1	-1	-1	-0.944	0.95	1	1	1	C
150	4	d150s4	Eisen biegen, Eiweiß futtern - nach dieser Formel trainieren Kraftsportler und solche, die es werden wollen, seit Jahrzehnten.	Eisen biegen, Eiweiß futtern - nach dieser Formel trainieren Kraftsportler und solche, die es werden vlnené, seit Jahrzehnten.	Železo ohýbať, bielkovinami sa napchávať - podľa tohto vzorca trénujú kulturisti a tí, ktorí sa nimi chcú stať po celé desaťročia.	Železo ohýbať, bielkovinami sa napchávať - podľa tohto vzorca trénujú kulturisti a tí, ktorí sa nimi chcú stať po celé desaťročia.	0.952	0.952	0.952	0.952	0.905	0.04	0	0	0	0	0	0	0	0	1	1	1	1	-0.952	-0.952	-0.952	-0.952	-0.905	0.96	1	1	1	C
150	5	d150s5	Dabei denkt man in erster Linie an Männer mit dickem Bizeps, die sich hastig nach dem Training einen Eiweiß-Shake einverleiben.	Dabei denkt človeka erster Linie Männer mit Dickom Bizeps, die sich hastig nach dem školenia einen Eiweiß-Shake einverleiben.	V prvom rade si pritom pomyslíme na mužov s veľkým bicepsom, ktorí sa po tréningu náhlia vypiť nejaký proteínový shake.	V prvom rade si pritom pomyslíme na mužov s veľkým bicepsom, ktorí sa po tréningu náhlia vypiť nejaký proteínový shake.	1	1	1	1	0.95	0	0	0	0	0	0	0	0	0	1	1	1	1	-1	-1	-1	-1	-0.95	1	1	1	1	C
150	6	d150s6	Zudem täglich Steaks oder Hühnchen, Hauptsache mageres Fleisch, denn das macht Muskeln, so lautet das Klischee.	Zudem täglich Steaky oder Hühnchen, Hauptsache mageres Fleisch, denn das macht Muskeln, takže lautet das Klischee.	Ku tomu denne steaky alebo kurčatá, predovšetkým chudé mäso, pretože to robí svaly, taký je stereotyp.	Ku tomu denne steaky alebo kurčatá, predovšetkým chudé mäso, pretože to robí svaly, taký je stereotyp.	0.938	1	1	1	0.938	0.06	0	0	0	0	0	0	0	0	1	1	1	1	-0.938	-1	-1	-1	-0.938	0.94	1	1	1	C
150	7	d150s7	Und tatsächlich, egal ob man es als Kraftsportler auf Massezuwachs abgesehen hat oder einfach nur ein wenig für seine Gesundheit tun will Dass der Körper nach dem Sport zum Muskelaufbau Eiweiß braucht, ist unstrittig.	Und tatsächlich, RÁVNA ob muž es als Kraftsportler auf Massezuwachs abgesehen klobúk oder einfach nur ein wenig für seine Gesundheit ton bude dass der Körper nach dem Sport zum Muskelaufbau Eiweiß braucht, ist unstrittig.	A skutočne, bez ohľadu na to, či máte ako kulturista zálusk na získanie svalovej hmoty alebo len chcete urobiť niečo pre svoje zdravie: Fakt, že telo potrebuje bielkoviny po športe, je nesporný.	A skutočne, bez ohľadu na to, či máte ako kulturista zálusk na nabranie svalovej hmoty alebo len chcete urobiť niečo pre svoje zdravie: Fakt, že telo potrebuje bielkoviny po športe, je nesporný.	1	1	1	1	1	0	0	0	0	0.031	0.031	0.031	0.031	0.031	0.96	0.93	0.9	0.86	-0.969	-0.969	-0.969	-0.969	-0.969	0.96	0.93	0.9	0.86	C
150	8	d150s8	Nur so können unsere Muskeln, die selbst überwiegend aus Eiweiß bestehen, wachsen.	Nur takže können unsere Muskeln, die Selbst Überwiegend aus Eiweiß bestehen, wachsen.	Iba týmto spôsobom môžu naše svaly, ktoré sú sami o sebe tvorené prevažne z bielkovín, rásť.	Iba týmto spôsobom môžu naše svaly rásť, lebo sú sami o sebe tvorené prevažne z bielkovín.	1	1	1	1	0.938	0	0	0	0	0.063	0.188	0.188	0.188	0.188	0.93	0.8	0.71	0.61	-0.937	-0.812	-0.812	-0.812	-0.75	0.93	0.8	0.71	0.61	C
150	9	d150s9	Mit den Bausteinen aus der Ernährung verdickt der Körper Muskelfasern, neue entstehen.	Mit den Bausteinen aus der ernährung verdickt der Körper Muskelfasern, neue entstehen.	So základnými stavebnými kameňmi zo stravy zhustnú svalové vlákna a vznikajú nové.	Pomocou základných prvkov zo stravy svalové vlákna zhustnú a vznikajú nové.	1	1	1	1	0.917	0	0	0	0	0.333	0.583	0.583	0.583	0.5	0.66	0.36	0.1	0	-0.667	-0.417	-0.417	-0.417	-0.417	0.66	0.36	0.1	0	C
150	10	d150s10	Doch aus welcher Quelle das Eiweiß stammen sollte, um die besten Ergebnisse zu erzielen - das war bisher nicht eindeutig geklärt.	Doch aus Welcher Quelle das Eiweiß Stammen sollte, um die Ergebnisse besten zu erzielen - Das war Bishera nicht eindeutig geklärt.	Avšak z ktorého zdroja by mal proteín pochádzať, aby sa dosiahli čo najlepšie výsledky - to nebolo doteraz jasné.	Avšak z ktorého zdroja by mal proteín pochádzať, aby sa dosiahli čo najlepšie výsledky - to nebolo doteraz jasné.	1	1	1	1	0.947	0.04	0	0	0	0	0	0	0	0	1	1	1	1	-1	-1	-1	-1	-0.947	0.96	1	1	1	C
150	11	d150s11	Taugt eher tierisches Protein, wie es in magerem Fleisch wie Rind oder Hühnchen und in Fisch oder Milchprodukten vorkommt Oder bringt es pflanzliches Eiweiß etwa aus Hülsenfrüchten wie Bohnen oder Linsen genauso gut?	Taugt eher tierisches bielkoviny, wie es v Magera Fleisch wie Rind oder Hühnchen und v Fisch oder Milchprodukten vorkommt Oder bringt es pflanzliches Eiweiß etwa aus Hülsenfrüchten wie Bohnen oder Linsen genauso črevo?	Hodia sa na to skôr živočíšne bielkoviny, ktoré sú napríklad v chudom mäse, ako je hovädzie a kuracie mäso alebo tie, čo sa vyskytujú v rybách a mliečnych výrobkoch? Alebo sú to rastlinné bielkoviny, napríklad zo strukovín, ako bôby alebo šošovica?	Hodia sa na to skôr živočíšne bielkoviny, ktoré sú napríklad v chudom mäse, ako je hovädzie a kuracie mäso alebo tie, ktoré sa vyskytujú v rybách a mliečnych výrobkoch? Alebo sú to rastlinné bielkoviny, napríklad zo strukovín, ako bôby alebo šošovica?	0.902	0.951	0.951	0.951	0.927	0.07	0	0	0	0	0.024	0.024	0.024	0.024	0.97	0.95	0.92	0.89	-0.902	-0.927	-0.927	-0.927	-0.903	0.9	0.95	0.92	0.89	C
150	12	d150s12	Körperkraft auch in der Hülsenfrüchte-Gruppe	Körperkraft auch in der Hülsenfrüchte-Gruppe	Telesná sila aj v strukovinách	Telesná sila aj v strukovinách	1	1	1	1	0.8	0	0	0	0	0	0	0	0	0	1	1	1	1	-1	-1	-1	-1	-0.8	1	1	1	1	C
150	13	d150s13	Aus den Ernährungsdaten, die per Fragebogen erfasst wurden, entwickelten die Forscher sechs Kategorien Fast Food und fettreiches Essen, Fisch, rotes Fleisch, Hühnchen, Milch und Hülsenfrüchte.	Aus den Ernährungsdaten, zomrieť za Fragebogen erfasst wurden, entwickelten zomrieť Forscher sechs Kategórie Fast Food und fettreiches Essen, Fisch, rotes Fleisch, Hühnchen, Milch und Hülsenfrüchte.	Z nutričných údajov zozbieraných dotazníkom, vedci vytvorili šesť kategórii: Fastfood a jedlo s vysokým obsahom tuku, ryby, červené mäso, kuracie mäso, mlieko a strukoviny.	Z nutričných údajov zozbieraných dotazníkom, vedci vytvorili šesť kategórii: Fastfood a jedlo s vysokým obsahom tuku, ryby, červené mäso, kuracie mäso, mlieko a strukoviny.	1	1	1	1	1	0	0	0	0	0	0	0	0	0	1	1	1	1	-1	-1	-1	-1	-1	1	1	1	1	C
150	14	d150s14	Je nachdem, wie sie sich in erster Linie ernährten, kamen die Probanden in eine der Gruppen.	Je nachdem, wie sie sich v erster Línia ernährten, kachlí die Probanden v eine der Gruppen.	V závislosti od toho, ako sa účastníci pokusu stravovali, spadali do skupín.	V závislosti od toho, ako sa účastníci pokusu stravovali, spadali do skupín.	1	1	1	1	1	0.12	0	0	0	0	0	0	0	0	1	1	1	1	-1	-1	-1	-1	-1	0.88	1	1	1	C
150	15	d150s15	Zudem erfassten die Forscher Daten zur Knochendichte sowie zur Kraft der Oberschenkelmuskulatur.	Zudem erfassten zomrieť Forscher Daten zur Knochendichte sowie zur Kraft der Oberschenkelmuskulatur.	Okrem toho vedci zapisovali údaje o hustote kostí, ako aj o sile stehenných svalov.	Okrem toho vedci zapisovali údaje o hustote kostí, ako aj o sile stehenných svalov.	1	1	1	1	0.929	0	0	0	0	0	0	0	0	0	1	1	1	1	-1	-1	-1	-1	-0.929	1	1	1	1	C
150	16	d150s16	Und sie maßen die sogenannte appendikuläre, skelettale Muskelmasse (ASMM) - eine Größe, mit der unter anderem die Kraft zur Steuerung der Extremitäten bestimmt werden kann.	Und sie die Massen sogenannte appendikuläre, skelettale Muskelmasse (ASMM) - eine Größe, mit der unter Ander die Kraft zur Steuerung der Extremitäten bestimmt werden kann.	A merali tzv. apendikulárnu, kostrovú svalovú hmotu (ASMM) - hodnotu, ktorá môže byť okrem iného použitá na stanovenie výkonu pre ovládanie končatín.	A merali tzv. apendikulárnu, kostrovú svalovú hmotu (ASMM) - hodnotu, ktorá môže byť okrem iného použitá na stanovenie výkonu pre ovládanie končatín.	1	1	1	1	0.955	0.08	0.04	0	0	0	0	0	0	0	1	1	1	1	-1	-1	-1	-1	-0.955	0.92	0.96	1	1	C
151	1	d151s1	Karneval in Venedig	Karneval in Venedig	Karneval v Benátkach	Karneval v Benátkach	0.667	0.667	0.667	0.667	0.667	0.33	0	0	0	0	0	0	0	0	1	1	1	0	-0.667	-0.667	-0.667	-0.667	-0.667	0.67	1	1	0	C
153	1	d153s1	Saroo Brierley, the inspiration for the film Lion:	Saro Brierley, inšpiráciou pre film Lion:	Saro Brierley, inšpiráciou pre film Lion:	Saroo Brierley, námet filmu Lion.	1	1	1	1	0.8	0.16	0	0	0	1	1	1	1	0.8	0.16	0	0	0	0	0	0	0	0	0	0	0	0	E
153	2	d153s2	'My mother saw my face after 25 years'	"Moja matka videla môj tvár po 25 rokoch"	"Moja matka videla moju tvár po 25 rokoch"	"Moja matka uvidela moju tvár po dvadsiatich piatich rokoch."	0.556	0.556	0.556	0.556	0.556	0.44	0.25	0	0	0.444	0.444	0.444	0.444	0.444	0.55	0.38	0.14	0	-0.112	-0.112	-0.112	-0.112	-0.112	0.11	0.13	0.14	0	E
153	3	d153s3	When he was five, he fell asleep on a train and ended up 1,000 miles from home.	Keď mal päť, zaspal na vlak a skončil 1000 míľ od domova.	Keď mal päť, zaspal vo vlaku a skončil 1000 míľ od domova.	Keď mal päť, zaspal vo vlaku a ocitol sa na mieste vzdialenom 1600 kilometrov od domova.	0.5	0.563	0.563	0.563	0.563	0.5	0.27	0.15	0.08	0.438	0.438	0.438	0.438	0.438	0.56	0.47	0.37	0.33	-0.062	-0.125	-0.125	-0.125	-0.125	0.06	0.2	0.22	0.25	E
153	4	d153s4	His journey from Indian street-child to adopted Australian is now the subject of an Oscar-tipped film.	Jeho cesta od indického pouličné dieťaťa prijatú Austrálčan je teraz predmetom Oscar hrotom filmu.	Jeho cesta od indického pouličného dieťaťa k adoptovanému Austrálčanovi je teraz námetom na Oskara nominovaného filmu.	Jeho cesta od indického dieťaťa z ulice po adoptovaného Austrálčana je témou filmu nominovaného na Oskara.	0.563	0.688	0.688	0.688	0.688	0.43	0.2	0.14	0.07	0.375	0.688	0.688	0.688	0.625	0.62	0.26	0.14	0.07	-0.188	0	0	0	-0.063	0.19	0.06	0	0	E
153	5	d153s5	Here he and his biological mother talk about their reunion	Tu on a jeho biologická matka hovoriť o svojom stretnutí	Tu on a jeho biologická matka hovoria o svojom stretnutí	On a jeho biologická matka rozprávajú príbeh ich stretnutia po rokoch.	0.545	0.636	0.636	0.636	0.636	0.45	0.4	0.34	0.25	0.545	0.636	0.636	0.636	0.636	0.45	0.4	0.34	0.25	0	0	0	0	0	0	0	0	0	E
153	6	d153s6	The Academy Awards are on Sunday, and Los Angeles is in full Oscarsmode, with limousines ferrying stars, executives and other film folk through the winter sunshine to receptions and cocktail parties.	Akadémia Awards v nedeľu, a Los Angeles je v plnom Oscarsmode, s limuzíny trajekty hviezdy, manažérov a ďalšími filmovými ľud cez zimné slniečko do recepciou a koktailov.	Ceny Akadémie sú v nedeľu a Los Angeles je v plnom oskarovom ošiali, od limuzín prevážajúcich hviezdy, manažérov a ďalší filmový štáb,cez zimné slniečko, do recepciou s koktailami..	Ceny Akadémie sa odovzdávajú v nedeľu a Los Angeles je pohltené oskarovým ošiaľom, od limuzín pre celebrity, manažérov, filmových nadšencov, cez zimné slnečné lúče, až po recepcie a kokteilové večierky.	0.667	0.733	0.733	0.733	0.667	0.4	0.2	0.14	0.11	0.567	0.667	0.667	0.667	0.667	0.46	0.24	0.14	0.11	-0.1	-0.066	-0.066	-0.066	0	0.06	0.04	0	0	E
153	7	d153s7	Brierley, casual in a white T-shirt and black jeans, shrugs off the frenzy.	Brierley, príležitostná v bielom tričku a čiernych džínsoch, pokrčí mimo šialenstvo.	Brierley, ležérne v bielom tričku a čiernych džínsoch, ignoruje to šialenstvo.	Bierley, ležérne, v bielom tričku a čiernych rifliach, ignoruje všetko to šialenstvo.	0.5	0.5	0.5	0.5	0.417	0.5	0.36	0.3	0.22	0.25	0.25	0.25	0.25	0.167	0.74	0.55	0.4	0.34	-0.25	-0.25	-0.25	-0.25	-0.25	0.24	0.19	0.1	0.12	E
153	8	d153s8	“You can really submerge yourself in it and get lost – let it cloud you.	"Vy si naozaj ponoriť sa do neho a stratiť - nech ťa to oblak.	"Naozaj sa doň môžete ponoriť a stratiť sa v ňom.	"Môže vás to pohltiť a stratiť samého seba.	1	1	1	1	0.875	0.21	0.07	0	0	1	1	1	1	0.875	0.2	0.11	0	0	0	0	0	0	0	-0.01	0.04	0	0	E
153	9	d153s9	But I just don’t really want to get into it.	Ale ja proste naozaj nechcem, aby sa do nej dostať.	Ale ja sa proste naozaj nechcem do toho dostať.	Nechcem do toho vstupovať.	1	1	1	1	0.75	0.2	0	0	0	1	1	1	1	0.5	0.33	0.25	0.14	0	0	0	0	0	-0.25	0.13	0.25	0.14	0	E
153	10	d153s10	I’m sitting back, listening, you know, taking it in day by day.”	Sedím späť, počúvanie, viete, pričom ho deň po dni. "	Sedím späť, počúvanie, viete, pričom ho deň po dni. "	Sedím opodiaľ a načúvam, deň po dni."	0.714	0.714	0.714	0.714	0.571	0.44	0.25	0.14	0	0.714	0.714	0.714	0.714	0.571	0.44	0.25	0.14	0	0	0	0	0	0	0	0	0	0	E
153	12	d153s12	The story of his life, Lion, is up for six Oscars, including best picture.	Príbeh jeho života, lev, je až na šesť Oscarov, vrátane najlepší obraz.	Príbeh jeho života, Lion, je nominovaný až na šesť Oskarov, vrátane najlepší obraz.	Príbeh jeho života, Lion, bojuje o tohtoročnú cenu Akadémie a je nominovaný na šesť Oskarov, vrátane kategórie najlepší film.	0.579	0.579	0.579	0.579	0.579	0.42	0.17	0.06	0	0.421	0.474	0.474	0.474	0.474	0.57	0.39	0.24	0.13	-0.158	-0.105	-0.105	-0.105	-0.105	0.15	0.22	0.18	0.13	E
153	13	d153s13	“The feelgood movie we all need,” blares the promotional blurb, and for once the hype may be justified.	"The Feelgood film, ktorý sme všetci potrebujeme," reve propagačné reklama, a pre raz humbuk môže byť odôvodnené.	"Pohodový film, ktorý sme všetci potrebujeme," revú reklama, a pre tentokrát môže byť humbuk odôvodnený.	"Všetci potrebujeme pohodový film," chrlia na nás z reklám a v tomto prípade je to na mieste.	0.778	0.944	0.944	0.944	0.889	0.22	0.05	0	0	0.722	0.833	0.833	0.833	0.833	0.27	0.11	0	0	-0.056	-0.111	-0.111	-0.111	-0.056	0.05	0.06	0	0	E
153	14	d153s14	It tells the story of how, in 1986, Saroo, an illiterate, impoverished five-year-old in rural central India, got separated from his brother at a railway station in Burhanpur, and accidentally ended up alone on a train that took him almost a thousand miles to Kolkata (then called Calcutta).	Rozpráva príbeh o tom, ako v roku 1986, Sara, negramotný, ochudobnený päť-ročný vo vidieckych centrálnej Indii, dostal oddelený od svojho brata na stanici v Burhanpur a omylom skončil sám na vlak, ktorý ho takmer vzal tisíc míľ od Kalkaty (potom volal Kalkata).	Rozpráva príbeh o tom, ako v roku 1986, Saroo, negramotný, chudobný päť-ročný chlapec z´vidieka centrálnej Indii, oddelil od svojho brata na stanici v Burhanpur a omylom skončil sám vo vlaku, ktorý ho vzal takmer tisíc míľ do Kalkaty.	Príbeh je o tom ako sa v roku 1986, Saroo, negramotný, zbedačený, päť ročný chlapec z vidieka strednej Indie oddelí od svojho brata na železničnej stanici v Burhanpure a ocitne sa vo vlaku do Kalkaty, vzdialenej viac ako 1600 kilometrov.	0.6	0.775	0.775	0.775	0.625	0.45	0.19	0.1	0.02	0.45	0.6	0.6	0.6	0.525	0.52	0.3	0.15	0.08	-0.15	-0.175	-0.175	-0.175	-0.1	0.07	0.11	0.05	0.06	E
153	15	d153s15	Unable to speak Bengali, and unaware of the name of his home town, he had no way to return.	Nemožno hovoriť bengálsky, a nevedomý meno svojho rodného mesta, nemal spôsob, ako vrátiť.	Nevedel hovoriť bengálsky a nepoznal meno svojho rodného mesta, nemal spôsob, ako vrátiť.	Keďže nerozprával po bengálsky a nepoznal názov svojho rodného mesta, jeho šance na návrat boli mizivé.	0.688	0.688	0.688	0.688	0.625	0.31	0.2	0.07	0	0.625	0.625	0.625	0.625	0.563	0.37	0.27	0.14	0	-0.063	-0.063	-0.063	-0.063	-0.062	0.06	0.07	0.07	0	E
153	16	d153s16	He lived as a street urchin and survived on his wits and scraps of food.	Žil ako uličník a prežil na jeho inteligenciu a zvyšky jedla.	Žil ako uličník a prežil na jeho inteligencii a zvyškoch jedla.	Žil na ulici a prežil len vďaka svojmu dôvtipu a zvyškom jedla.	0.5	0.583	0.583	0.583	0.583	0.5	0.09	0	0	0.5	0.583	0.583	0.583	0.583	0.5	0.09	0	0	0	0	0	0	0	0	0	0	0	E
153	17	d153s17	He was later taken in by an orphanage, and was eventually adopted by an Australian couple, Sue and John Brierley, who took him to start a new life in Tasmania.	On bol neskôr prijatá do sirotinca, a bol nakoniec prijatý austrálsky pár, Sue a John Brierley, kto vzal ho začať nový život v Tasmánii.	On bol neskôr prijatý do sirotinca a adoptovaný austrálskym párom, Sue a Johnom Brierleyovcami, ktorí ho vzali začať nový život v Tasmánii.	Neskôr sa dostal do sirotinca a napokon ho adoptoval austrálsky pár, Sue a John Brierleyovci. Vďaka nim začal nový život v Tasmánii.	0.455	0.545	0.545	0.545	0.5	0.58	0.39	0.27	0.14	0.5	0.682	0.682	0.682	0.636	0.5	0.28	0.15	0.05	0.045	0.137	0.137	0.137	0.136	-0.08	-0.11	-0.12	-0.09	E
153	18	d153s18	A quarter-century later came the implausible twist.	O štvrť storočia neskôr prišiel nepravdepodobný zvrat.	O štvrť storočia neskôr prišiel nepravdepodobný zvrat.	O dvadsaťpäť rokov neskôr došlo k nečakanému zvratu.	0.75	0.75	0.75	0.75	0.75	0.25	0	0	0	0.75	0.75	0.75	0.75	0.75	0.25	0	0	0	0	0	0	0	0	0	0	0	0	E
153	19	d153s19	Saroo – by now a robust, happy, windsurfing, fully fledged Aussie – used Google Earth, a handful of visual memories and immense dedication to identify his home town:	Saro - teraz robustný, šťastný, windsurfing, plnohodnotné Aussie - použité aplikácie Google Earth, hrsť vizuálnych spomienok a nesmiernu obetavosť k identifikácii jeho domovské mesto:	Saroo, teraz robustný, šťastný, austrálsky windsurfer použil aplikáciu Google Earth, hrsť vizuálnych spomienok a nesmiernu obetavosť k identifikácii jeho domovského mesta:	Saroo, dnes už statný, zrelý austrálsky windsurfer, použil Google Earth, hŕstku spomienok a obrovské odhodlanie, aby našiel svoje rodné mesto, Khandwa v strednej Indii.	0.792	0.958	0.958	0.958	0.833	0.2	0.08	0	0	0.667	0.75	0.75	0.75	0.75	0.33	0.17	0.04	0	-0.125	-0.208	-0.208	-0.208	-0.083	0.13	0.09	0.04	0	E
153	21	d153s21	In February 2012 he travelled there and found his biological mother, Fatima.	Vo februári 2012 tam cestoval a zistil, že jeho biologická matka Fatima.	Vo februári 2012 tam cestoval a našiel jeho biologickú matku, Fatimu.	Vo februári 2012 tam vycestoval a našiel svoju biologickú matku, Fatimu.	0.636	0.636	0.636	0.636	0.636	0.41	0.27	0.2	0.11	0.182	0.182	0.182	0.182	0.182	0.81	0.6	0.33	0.12	-0.454	-0.454	-0.454	-0.454	-0.454	0.4	0.33	0.13	0.01	E
155	2	d155s2	Kuala Lumpur airport terminal to be decontaminated after deadly attack on North Korean leader’s half-brother	letiskový terminál Kuala Lumpur, ktoré majú byť dekontaminované po smrteľnom útoku na severokórejský vodca nevlastný brat	Letiskový terminál Kuala Lumpur má byť dekontaminovaný po smrteľnom útoku na nevlastného brata severokórejského vodcu.	Letisko Kuala Lumpur je predmetom dekontaminácie po smrteľnom útoku na brata severokórejského lídra	0.769	0.769	0.769	0.769	0.692	0.37	0.26	0.14	0.07	0.538	0.538	0.538	0.538	0.462	0.53	0.35	0.15	0.08	-0.231	-0.231	-0.231	-0.231	-0.23	0.16	0.09	0.01	0.01	B
155	4	d155s4	Shizuo Kambayashi, Wong Maye-E/AP	Shizuo Kambayashi, Wong Maye-E / AP	Shizuo Kambayashi, Wong Maye-E / AP	Shizuo Kambayashi, Wong Maye-E/AP	0.75	0.75	0.75	0.75	0.5	0.5	0.4	0.25	0	0.75	0.75	0.75	0.75	0.5	0.5	0.4	0.25	0	0	0	0	0	0	0	0	0	0	B
155	5	d155s5	The substance used in the killing of Kim Jong-nam was a “VX nerve agent”, a highly toxic liquid used only in chemical warfare, Malaysian police have said.	Látka používa v zabíjaní Kim Čong-nam bol "VX nervu agenta", vysoko toxická kvapalina použitá iba v chemických zbraní, Malajzijské polícia povedal.	Látka použítá na vraždu Kim Čong-nam bola "nervovo-paralytická látka VX", vysoko toxická kvapalina použitá iba v chemických zbraniach, informovala malajzijské polícia.	Podľa vyjadrení malajzijskej polície Kim Jong-nama zavraždili „nervovo-paralytickou látkou VX“, ktorá je vysoko toxická a používa sa iba na bojové chemické účely.	0.773	0.909	0.909	0.909	0.818	0.22	0.04	0	0	0.773	0.909	0.909	0.909	0.818	0.22	0.04	0	0	0	0	0	0	0	0	0	0	0	B
155	6	d155s6	Analysis What is the VX nerve agent that killed North Korean Kim Jong-nam?	Analýza Čo je nervovo paralytické látke VX, ktorá zabila severokórejský Kim Čong-nam?	Analýza Čo je nervovo-paralytická látká VX, ktorá zabila Severokórejsčana Kim Čong-nama?	Analýza nervovo-paralytickej látky VX, ktorá usmrtila Kim Jong-nama	1	1	1	1	0.75	0.33	0.09	0	0	0.875	0.875	0.875	0.875	0.75	0.36	0.1	0	0	-0.125	-0.125	-0.125	-0.125	0	0.03	0.01	0	0	B
155	7	d155s7	Declared a weapon of mass destruction by the UN, the banned chemical agent is more potent than any other	Deklarovaná zbraň hromadného ničenia OSN, zakázané chemické činidlo je silnejšia než akákoľvek iná	Deklarovaná zbraň hromadného ničenia OSN, zakázaná chemická látkaje silnejšia než čokoľvek iné.	Zakázaná chemická látka, ktorú je Organizácia spojených národov označuje ako zbraň hromadného ničenia, je silnejšia než čokoľvek iné.	0.611	0.833	0.833	0.833	0.667	0.33	0.24	0.13	0	0.5	0.778	0.778	0.778	0.611	0.5	0.36	0.2	0.07	-0.111	-0.055	-0.055	-0.055	-0.056	0.17	0.12	0.07	0.07	B
155	8	d155s8	Read more	Čítaj viac	Čítajte viac	Čítajte viac	0.5	0.5	0.5	0.5	0	0.5	0	0	0	0	0	0	0	0	1	1	0	0	-0.5	-0.5	-0.5	-0.5	0	0.5	1	0	0	B
155	9	d155s9	The inspector general, Khalid Abu Bakar, said later that one of the two women suspected of involvement in the poisoning also suffered its effects:	Generálneho inšpektora, Khalid Abu Bakar, neskôr povedal, že jedna z dvoch žien, podozrivých z účasti na otravu tiež trpel účinky:	Generálny inšpektor, Khalid Abu Bakar, neskôr povedal, že jedna z dvoch žien, ktoré boli podozrivé z účasti na otrave, tiež utrpeli účinky:	Policajný inšpektor Khalid Abu Bakar neskôr povedal, že jedna z dvoch žien podozrivých z účasti na trestnom čine taktiež utrpela účinky otravy:	0.318	0.318	0.318	0.318	0.273	0.68	0.62	0.6	0.58	0.318	0.409	0.409	0.409	0.318	0.68	0.57	0.5	0.42	0	0.091	0.091	0.091	0.045	0	-0.05	-0.1	-0.16	B
155	10	d155s10	“She was vomiting.”	"Bola zvracanie."	"zvracanie."	"Zvracala."	1	1	1	1	1	0	0	0	0	1	1	1	1	0	0	0	0	0	0	0	0	0	-1	0	0	0	0	B
155	11	d155s11	The findings follow a preliminary analysis of swabs taken from the face and eyes of the victim, who is the half-brother of the North Korean leader, Kim Jong-un.	Zistenie nasledovať predbežnú analýzu sterov odobratých z tváre a očí obete, ktorá je nevlastný brat severokórejského vodcu Kim Čong-un.	Zistenia pochádzajú z predbežnej analýzy sterov odobratých z tváre a očí obete, ktorou je nevlastný brat severokórejského vodcu Kim Čong-un.	Zistenia pochádzajú z predbežnej analýzy vatových tampónov odobratých z tváre a očí obete, ktorou bol brat severo-kórejského lídra Kim Jong-una.	0.55	0.65	0.65	0.65	0.6	0.4	0.26	0.22	0.17	0.3	0.35	0.35	0.35	0.35	0.7	0.52	0.44	0.35	-0.25	-0.3	-0.3	-0.3	-0.25	0.3	0.26	0.22	0.18	B
155	12	d155s12	More items linked to the attack at Kuala Lumpur airport were still being analysed and the terminal would be decontaminated, police said.	Ďalšie položky spojené s útokom na letisku v Kuala Lumpur ešte boli analyzované a terminál by byť dekontaminované, oznámila polícia.	Ďalšie položky spojené s útokom na letisku v Kuala Lumpur ešte boli analyzované a terminál bude dekontaminovaný, oznámila polícia.	Polícia uviedla, že viaceré položky v súvislosti s útokom na letisku Kuala Lumpur boli predmetom analýzy a terminál bude dekontaminovaný.	0.4	0.75	0.75	0.75	0.6	0.6	0.26	0.11	0.05	0.3	0.6	0.6	0.6	0.5	0.7	0.36	0.22	0.11	-0.1	-0.15	-0.15	-0.15	-0.1	0.1	0.1	0.11	0.06	B
155	13	d155s13	VX – also known as ethyl N-2-Diisopropylaminoethyl Methylphosphonothiolate – is classified by the United Nations as a weapon of mass destruction.	VX - tiež známy ako etyl-N-2-diizopropylaminoetyl Methylphosphonothiolate - sú klasifikované Organizáciou Spojených národov ako zbraň hromadného ničenia.	Látka VX tiež známa ako etyl-N-2-diizopropylaminoetylmethylphosphonothiolát je klasifikovaná Organizáciou Spojených národov ako zbraň hromadného ničenia.	Nervovo-paralytická látka VX taktiež známa pod chemickým názvom S-(2-(izopropylamino)etyl)-O-(etyl)metylfosfonotionát je Organizáciou spojených národov označená ako zbraň hromadného ničenia.	0.556	0.611	0.611	0.611	0.556	0.49	0.29	0.18	0.06	0.389	0.444	0.444	0.444	0.444	0.66	0.35	0.19	0.06	-0.167	-0.167	-0.167	-0.167	-0.112	0.17	0.06	0.01	0	B
155	14	d155s14	Kim Jong-nam died on 13 February from a seizure on while being taken to hospital after complaining that a woman had sprayed chemicals in his face at Kuala Lumpur airport.	Kim Čong-nam zomrel 13. februára od záchvate na zatiaľ čo je prevezený do nemocnice po tom, čo sťažovať, že žena bola nastriekaná chemických látok v jeho tvári na letisku v Kuala Lumpur.	Kim Čong-nam zomrel 13. februára počas prevozu do nemocnice po tom, čo sa sťažoval, že mu istá žena nastriekala chemikáliu na tvár na letisku v Kuala Lumpur.	Kim Jong-nam zomrel 13. februára počas prevozu do nemocnice po tom, ako mu istá žena nasprejovala chemikáliu do tváre na letisku Kuala Lumpur.	0.783	0.826	0.826	0.826	0.565	0.43	0.22	0.1	0.03	0.435	0.478	0.478	0.478	0.348	0.65	0.39	0.25	0.23	-0.348	-0.348	-0.348	-0.348	-0.217	0.22	0.17	0.15	0.2	B
155	15	d155s15	Leaked CCTV footage shows a woman grabbing his face.	Unikli CCTV stopáž ukazuje ženu popada jeho tvár.	Uniknutý záznam CCTV ukazuje, ako mu istá žena siaha na tvár.	Uniknutý záznam CCTV ukazuje, ako mu siaha na tvár.	0.778	0.778	0.778	0.778	0.667	0.22	0	0	0	0.333	0.333	0.333	0.333	0.111	0.75	0.63	0.5	0.33	-0.445	-0.445	-0.445	-0.445	-0.556	0.53	0.63	0.5	0.33	B
155	16	d155s16	Malaysian police had said earlier that two attackers rubbed a liquid on him before walking away and quickly washing their hands.	Malajzijské polícia už skôr uviedol, že dvaja útočníci trela kvapaliny na neho pred odchádzal a rýchlo umyjú ruky.	Malajzijská polícia už skôr uviedla, že dve útočníčky mu vtreli kvapalinu, následne si rýchlo umyli ruky a ušli.	Malajzijská polícia informovala, že dve útočníčky naňho natreli kvapalinu, vzápätí ušli a rýchlo si očistili ruky.	0.813	0.875	0.875	0.875	0.75	0.27	0.05	0	0	0.438	0.75	0.75	0.75	0.625	0.61	0.17	0.06	0	-0.375	-0.125	-0.125	-0.125	-0.125	0.34	0.12	0.06	0	B
155	18	d155s18	“Not very diplomatic.”	"Moc diplomatický."	"Nie je to veľmi diplomatické."	že to nie je veľmi diplomatické.	1	1	1	1	0.833	0	0	0	0	0.167	0.5	0.5	0.5	0.5	0.83	0.41	0	0	-0.833	-0.5	-0.5	-0.5	-0.333	0.83	0.41	0	0	B
155	19	d155s19	South Korea said the use of VX was a “blatant violation” of international norms.	Južná Kórea že používanie VX bol "do očí bijúce porušenie" medzinárodných noriem.	Južná Kórea tvrdí,že použitie látky VX bolo "do očí bijúce porušenie" medzinárodných noriem.	Južná Kórea označila použitie látky VX za do očí bijúce porušenie medzinárodných noriem.	0.308	0.308	0.308	0.308	0.308	0.69	0.5	0.36	0.3	0.154	0.154	0.154	0.154	0.154	0.84	0.66	0.45	0.3	-0.154	-0.154	-0.154	-0.154	-0.154	0.15	0.16	0.09	0	B
155	20	d155s20	“We are shocked by the latest revelation by the Malaysian authorities that VX … was used in the death of Kim Jong-nam,” Seoul’s foreign ministry said in a statement.	"Sme šokovaní najnovším odhalením tým, malajzijskej úrady, ktoré VX ... bol použitý k smrti Kim Čong-nam," Soul ministerstvo zahraničia vo vyhlásení.	"Sme šokovaní najnovším odhalením malajzijskej úrady, látlla VX bol použitá na usmrtenie Kim Čong-nama," výhlásilo ministerstvo zahraničia v Soule.	"Šokovalo nás najnovšie zistenie malajzijských úradov, ktoré odhalilo, že nervovo-paralytická látka VX bola použitá na usmrtenie Kim Jong-nama.“	1	1	1	1	0.944	0.14	0	0	0	0.778	1	1	1	0.722	0.26	0.16	0.11	0.06	-0.222	0	0	0	-0.222	0.12	0.16	0.11	0.06	B
155	21	d155s21	“The use of any chemical weapons is strictly banned for any reason and in any place,” it added	"Použitie akýchkoľvek chemických zbraní je prísne zakázaný z akéhokoľvek dôvodu a na každom mieste," dodal	"Použitie akýchkoľvek chemických zbraní je prísne zakázané z akéhokoľvek dôvodu a na akomkoľvek mieste," dodal	Ministerstvo ďalej dodalo, že použitie akýchkoľvek chemických zbraní je prísne zakázané pre akýkoľvek účel a na akomkoľvek mieste.	0.556	0.611	0.611	0.611	0.611	0.44	0.35	0.25	0.2	0.444	0.5	0.5	0.5	0.5	0.55	0.47	0.38	0.27	-0.112	-0.111	-0.111	-0.111	-0.111	0.11	0.12	0.13	0.07	B
155	21	d155s21	“The use of any chemical weapons is strictly banned for any reason and in any place,” it added	"Použitie akýchkoľvek chemických zbraní je prísne zakázaný z akéhokoľvek dôvodu a na každom mieste," dodal	"Použitie akýchkoľvek chemických zbraní je prísne zakázané z akéhokoľvek dôvodu a na akomkoľvek mieste," dodal	Ministerstvo ďalej dodalo, že použitie akýchkoľvek chemických zbraní je prísne zakázané pre akýkoľvek účel a na akomkoľvek mieste.	0.556	0.611	0.611	0.611	0.611	0.44	0.35	0.25	0.2	0.444	0.5	0.5	0.5	0.5	0.55	0.47	0.38	0.27	-0.112	-0.111	-0.111	-0.111	-0.111	0.11	0.12	0.13	0.07	B
156	1	d156s1	Is there anything good about that spider in the corner of my room?	Je niečo, čo dobre o tom pavúk v rohu mojej izby?	Je niečo dobré na tom pavúkovi v rohu mojej izby?	Je niečo dobré na tom pavúku v rohu mojej izby?	0.4	0.4	0.4	0.4	0.4	0.63	0.4	0.22	0.12	0.1	0.1	0.1	0.1	0.1	0.9	0.77	0.62	0.42	-0.3	-0.3	-0.3	-0.3	-0.3	0.27	0.37	0.4	0.3	E
156	2	d156s2	Is it true climate change is making spiders bigger?	Je pravda, že zmena klímy je robiť pavúkmi väčšie?	Je pravda, že kvôli zmene klímy sa pavúky zväčšujú?	Je pravda, že zmena klímy zväčšuje pavúky?	0.571	0.571	0.571	0.571	0.429	0.66	0.5	0.42	0.33	0.571	0.571	0.571	0.571	0.571	0.55	0.25	0.14	0	0	0	0	0	0.142	-0.11	-0.25	-0.28	-0.33	E
156	3	d156s3	Why do spiders give us the creeps?	Prečo pavúky nám naskakuje husia koža?	Prečo pri pavúkoch nám naskakuje husia koža?	Prečo nám pavúky naháňajú zimomriavky?	0.6	0.8	0.8	0.8	0.8	0.5	0	0	0	1	1	1	1	0.8	0.28	0	0	0	0.4	0.2	0.2	0.2	0	-0.22	0	0	0	E
156	4	d156s4	We get a spider expert to answer questions about our eight-legged friends	Dostávame pavúk expert odpovedať na otázky týkajúce sa našich osemnohého priateľmi	Spýtali sme sa experta na pavúky, aby nám odpovedal na otázky týkajúce sa našich osemnohých priateľov.	Požiadali sme odborníka na pavúky, aby nám odpovedal na otázky týkajúce sa našich osemnohých priateľov	0.6	0.667	0.667	0.667	0.6	0.33	0.29	0.24	0.18	0.2	0.2	0.2	0.2	0.133	0.87	0.73	0.71	0.69	-0.4	-0.467	-0.467	-0.467	-0.467	0.54	0.44	0.47	0.51	E
156	5	d156s5	Is it our imagination or are spiders getting bigger?	Je to naša predstavivosť, alebo sú pavúky čoraz väčšie?	Je to naša predstavivosť, alebo sú pavúky čoraz väčšie?	Je to len naša predstavivosť alebo sa pavúky naozaj zväčšujú?	0.4	0.4	0.4	0.4	0.4	0.6	0.33	0.12	0	0.4	0.4	0.4	0.4	0.4	0.6	0.33	0.12	0	0	0	0	0	0	0	0	0	0	E
156	6	d156s6	It’s true that some spiders respond positively to the changes that we make to the environment.	Je pravda, že niektorí pavúky reagujú pozitívne na zmeny, ktoré robíme pre životné prostredie.	Je pravda, že niektoré pavúky reagujú pozitívne na zmeny v životnom prostredí.	Je pravda, že niektoré pavúky reagujú pozitívne na zmeny v životnom prostredí?	0.5	0.5	0.5	0.5	0.417	0.57	0.46	0.33	0.18	0.083	0.083	0.083	0.083	0.083	0.91	0.9	0.9	0.88	-0.417	-0.417	-0.417	-0.417	-0.334	0.34	0.44	0.57	0.7	E
156	7	d156s7	Warming temperatures in particular are likely to benefit the growth and development of spiders.	Zahrievacie teploty najmä je pravdepodobné, že prospech rastu a rozvoja pavúkov.	Zdá sa, že najmä zahrievacie teploty prispievajú k rastu a rozvoju pavúkov.	Zdá sa, že najmä vysoké teploty prispievajú k rastu a rozšíreniu pavúkov.	0.5	0.667	0.667	0.667	0.583	0.5	0.09	0	0	0.167	0.167	0.167	0.167	0.167	0.83	0.63	0.5	0.33	-0.333	-0.5	-0.5	-0.5	-0.416	0.33	0.54	0.5	0.33	E
156	8	d156s8	We may also see larger spiders in areas like cities where there is lots of food for them, just like you see fat pigeons living off food waste.	Môžeme tiež vidieť väčšiu pavúkmi v oblastiach, ako je mestách, kde existuje veľa potravín pre nich, rovnako ako vidíte tuk holuby žijúci mimo potravinový odpad.	Veľké pavúky môžeme vidieť v oblastiach, ako v mestách, kde je pre nich veľa potravín. Rovnako tu môžeme vidieť aj holuby, ktoré sa živia potravinovým odpadom.	Väčšie pavúky môžeme vidieť v oblastiach ako sú mestá, kde je pre nich dostatok jedla. Rovnako tu môžete vidieť aj tučné holuby, ktoré sa živia odpadom z potravin.	0.571	0.821	0.821	0.821	0.714	0.42	0.11	0.03	0	0.321	0.357	0.357	0.357	0.321	0.75	0.52	0.3	0.2	-0.25	-0.464	-0.464	-0.464	-0.393	0.33	0.41	0.27	0.2	E
156	9	d156s9	There is a limit as to how big insects and spiders are able to get because they breathe through small holes in their exoskeleton where the oxygen goes straight to their muscles.	Tam je limit, ako veľký hmyz a pavúky sú schopní získať, pretože dýchať cez malé otvory v ich exoskeleton kde kyslík idú rovno do svojich svalov.	Existuje limit, ktorý určuje aký veľký hmyz a pavúky sú holuby schopné uloviť, pretože dýchajú cez malé otvory na exoskeletone, cez ktoré prúdi kyslík priamo svalov.	Holuby sú obmedzené tým, aký veľký hmyz a aké veľké pavúky dokážu chytiť, pretože dýchajú cez malé otvory na ich vonkajšej kostre, cez ktoré prúdi kyslík priamo do svalov.	0.517	0.69	0.69	0.69	0.655	0.44	0.14	0.07	0	0.345	0.483	0.483	0.483	0.414	0.65	0.42	0.33	0.23	-0.172	-0.207	-0.207	-0.207	-0.241	0.21	0.28	0.26	0.23	E
156	10	d156s10	Also, as spiders get bigger they become more obvious to predators and have more difficulty building their webs.	Tiež, ako pavúky získať väčšiu oni stanú sa viac zrejmé, dravce a budú mať väčšie ťažkosti budovanie ich rebrá.	Čim je pavúk väčší, tým je nápadnejší pre dravce a tým majú pavúky väčšie ťažkosti pri spletaní svojich pavučín.	Čim sú pavúky väčšie, tým sú nápadnejšie pre predátorov a oveľa ťažšie splietajú pavučiny.	1	1	1	1	0.857	0.15	0	0	0	0.929	1	1	1	0.786	0.36	0.05	0	0	-0.071	0	0	0	-0.071	0.21	0.05	0	0	E
156	11	d156s11	So we don’t need to worry about being overrun with giant spiders any time soon.	Takže nemusíme obávať, že prekročenie s obrími pavúkmi v dohľadnej dobe.	Takže sa nemusíme obávať, že nás v dohľadnej dobe zamoria obrie pavúky.	Vôbec sa preto nemusíme báť, že nás v najbližšej dobe zamoria obrovské pavúky.	0.692	0.846	0.846	0.846	0.692	0.3	0	0	0	0.385	0.385	0.385	0.385	0.308	0.61	0.25	0.09	0	-0.307	-0.461	-0.461	-0.461	-0.384	0.31	0.25	0.09	0	E
156	12	d156s12	Is there anything good about that spider in the corner of my room?	Je niečo, čo dobre o tom pavúk v rohu mojej izby?	Je niečo, čo je dobré na tom pavúkovi v rohu mojej izby?	Je niečo dobré na tom pavúku v rohu mojej izby?	0.4	0.4	0.4	0.4	0.4	0.63	0.4	0.22	0.12	0.3	0.3	0.3	0.3	0.2	0.83	0.54	0.3	0.11	-0.1	-0.1	-0.1	-0.1	-0.2	0.2	0.14	0.08	-0.01	E
156	13	d156s13	There are many advantages to having spiders around, and very few disadvantages!	Existuje mnoho výhod s pavúkmi okolo, a len veľmi málo nevýhody!	Existuje mnoho výhod mať doma pavúka, a len veľmi málo nevýhod!	Život v blízkosti pavúkov nám prináša veľa výhod a len málo nevýhod.	0.667	0.833	0.833	0.833	0.75	0.33	0.09	0	0	0.667	0.833	0.833	0.833	0.75	0.33	0.09	0	0	0	0	0	0	0	0	0	0	0	E
156	14	d156s14	Having spiders around the home will help control pests such as flies, cockroaches and mosquitos, which leads to a cleaner healthier living environment!	S pavúky okolo domácnosti pomôže regulácii škodcov, ako sú muchy, šváby a komáre, čo vedie k čistejšej zdravšie životné prostredie!	V domácnosti vám pavúky môžu pomôcť s reguláciou škodcov, ako sú muchy, šváby a komáre, čo vedie k čistejšiemu zdravšiemu životnému prostrediu!	Pavúky Vám pomôžu mať pod kontrolou škodcov ako muchy, šváby či komáre. Mať vôkol domu pavúkov vedie taktiež k čistejšiemu a zdravšiemu životnému prostrediu!	0.68	0.8	0.8	0.8	0.76	0.32	0.08	0	0	0.48	0.68	0.68	0.68	0.64	0.52	0.2	0.04	0	-0.2	-0.12	-0.12	-0.12	-0.12	0.2	0.12	0.04	0	E
156	15	d156s15	This doesn’t mean you have to leave every cobweb in the corner of your room, but it is best to avoid spraying lots of harmful pesticides.	To neznamená, že budete musieť opustiť všetky pavučina v rohu miestnosti, ale to je najlepšie, aby sa zabránilo striekanie veľké množstvo škodlivých pesticídov.	To neznamená, že sa musíte zbaviť všetkých pavučín v rohu miestnosti, ale najlepšie bude, ak nebudete používať veľké množstvo škodlivých pesticídov.	To však neznamená, že musíte mať pavučiny v každom rohu izby, ale bude lepšie, ak sa vyhnete nadmernému používaniu pesticídov.	0.75	0.85	0.85	0.85	0.75	0.39	0.04	0	0	0.5	0.7	0.7	0.7	0.7	0.52	0.05	0	0	-0.25	-0.15	-0.15	-0.15	-0.05	0.13	0.01	0	0	E
156	16	d156s16	Many of the beneficial spiders that live in your house or garden, such as jumping spiders, don’t make a web, so you won’t even know that they are there working hard eating all the pests for you.	Mnohé z týchto prospešných pavúky, ktoré žijú vo vašom dome alebo na záhrade, ako je Skákavkovití, nerobia webe, takže nebudete ani vedieť, že tam sú tvrdo pracuje jesť všetky škodcu pre vás.	Mnohé z týchto prospešných pavúkov, ktoré žijú vo vašom dome alebo v záhrade, ako je snovačka Hasseltova, nesplietajú pavučiny, takže nebudete ani vedieť, že u vás doma tvrdo pracujú a požierajú všetky škodcov.	Mnohé užitočné pavúky, ktoré žijú vo vašom dome alebo záhrade, ako napríklad skákavé pavúky, si netkajú pavučiny. A vy dokonca ani netušíte, ako pre vás ťažko pracujú a požierajú všetkých škodcov.	0.548	0.774	0.774	0.774	0.677	0.4	0.25	0.16	0.13	0.516	0.613	0.613	0.613	0.581	0.47	0.24	0.15	0.09	-0.032	-0.161	-0.161	-0.161	-0.096	0.07	-0.01	-0.01	-0.04	E
156	17	d156s17	Should we kill spiders?	Mali by sme zabíjať pavúky?	Mali by sme zabíjať pavúky?	Mali by sme preto zabíjať pavúky?	0.167	0.167	0.167	0.167	0.167	0.83	0.62	0.27	0	0.167	0.167	0.167	0.167	0.167	0.83	0.62	0.27	0	0	0	0	0	0	0	0	0	0	E
156	18	d156s18	There are some species, such as redbacks and funnel webs that are of some concern and should be removed from houses.	Tam sú niektoré druhy, ako Redbacks a lievik pásov, ktoré majú určité obavy a mali by byť odstránené z domov.	Existujú isté druhy, ako napríklad pavučiny snovačky Hasseltovej a lievikovité pavučiny, pred ktorými by ste sa doma mali mať na pozore a zbaviť sa ich.	Existujú isté druhy, ako napríklad pavučiny snovačky Hasseltovej a lievikovité pavučiny, pred ktorými by ste sa doma mali mať na pozore a zbaviť sa ich.	0.76	0.88	0.88	0.88	0.84	0.24	0.04	0	0	0	0	0	0	0	1	1	1	1	-0.76	-0.88	-0.88	-0.88	-0.84	0.76	0.96	1	1	E
156	19	d156s19	If you feel you have to kill them, the best way to do this is to catch them in a small container and put them in the freezer, this avoids the use of pesticides.	Ak máte pocit, že zabiť, najlepší spôsob, ako to urobiť, je chytiť do malého kontajnera a dať ich do mrazničky, to vyhýba používanie pesticídov.	Ak si myslíte, že bude lepšie ak ich zabijete, najlepší spôsob ako to urobiť je pochytať ich do malej nádoby a zamraziť. Týmto spôsobom sa vyhnete použitiu pesticídov.	Ak si myslíte, že bude lepšie ak ich zabijete, najlepší spôsob ako to urobiť je pochytať ich do malej nádoby a zamraziť. Týmto spôsobom sa vyhnete použitiu pesticídov.	0.5	0.643	0.643	0.643	0.643	0.5	0.22	0.15	0.12	0	0	0	0	0	1	1	1	1	-0.5	-0.643	-0.643	-0.643	-0.643	0.5	0.78	0.85	0.88	E
156	20	d156s20	But keep in mind that the vast majority of spiders are beneficial to humans and can quite happily live alongside us.	Ale majte na pamäti, že drvivá väčšina z pavúkov sú prospešné pre človeka a môžu celkom spokojne žiť vedľa nás.	Ale majte na pamäti, že drvivá väčšina pavúkov sú prospešné pre človeka a môžu celkom spokojne spolunažívať s vami.	No pamätajte, že väčšina pavúkov je pre ľudí užitočná a môžeme s nimi šťastne spolunažívať.	1	1	1	1	0.933	0.25	0	0	0	0.8	1	1	1	0.8	0.36	0.05	0	0	-0.2	0	0	0	-0.133	0.11	0.05	0	0	E
156	21	d156s21	So only kill all the spiders if you like living with cockroaches and flies.	Takže len zabiť všetky pavúky Ak máte radi žijú s šváby a muchy.	Takže pavúky zabíjajte len vtedy, ak vám nevadí. že doma budete mať muchy a švábov.	Pavúky zabíjajte len vtedy, ak vám vyhovuje spolužitie so švábmi a muchami.	0.75	0.917	0.917	0.917	0.75	0.3	0	0	0	0.667	0.667	0.667	0.667	0.583	0.46	0.35	0.3	0.25	-0.083	-0.25	-0.25	-0.25	-0.167	0.16	0.35	0.3	0.25	E
157	1	d157s1	Nahrungsmittelunverträglichkeiten:	potravinová intolerancia:	Potravinová intolerancia:	Potravinová neznášanlivosť:	0.5	0.5	0.5	0.5	0.5	0.5	0	0	0	0.5	0.5	0.5	0.5	0.5	0.5	0	0	0	0	0	0	0	0	0	0	0	0	B
157	3	d157s3	Intoleranz?	Neznášanlivosť?	Neznášanlivosť?	Intolerancia?	1	1	1	1	0	0	0	0	0	1	1	1	1	0	0	0	0	0	0	0	0	0	0	0	0	0	0	B
157	4	d157s4	Alles Einbildung?	Všetko fantázie?	Všetko klam?	Všetko len hlúposť?	0.667	0.667	0.667	0.667	0.667	0.33	0	0	0	0.667	0.667	0.667	0.667	0.667	0.33	0	0	0	0	0	0	0	0	0	0	0	0	B
157	5	d157s5	Laktose, Gluten, Histamin:	Laktózu, lepok, histamínu:	Laktóza, lepok, histamín:	Laktóza, glutén, histamín:	1	1	1	1	0.667	0	0	0	0	0.333	0.333	0.333	0.333	0.333	0.66	0	0	0	-0.667	-0.667	-0.667	-0.667	-0.334	0.66	0	0	0	B
157	10	d157s10	Der Blick in einen Hamburger Bürokühlschrank:	Pohľad v Hamburgu kancelárii Chladnička:	Pohľad do hamburgskej kancelárskej chladničky:	Náhľad do jednej Hamburgskej mini chladničky.	1	1	1	1	0.833	0	0	0	0	0.667	0.667	0.667	0.667	0.5	0.33	0	0	0	-0.333	-0.333	-0.333	-0.333	-0.333	0.33	0	0	0	B
157	12	d157s12	Zehn Personen, fünf verschiedene Kaffeezusätze.	Desať ľudí, päť rôznych kávové smotany.	Desať ľudí, päť rôznych príloh do kávy.	Desať ľudí, päť rozličných príloh ku káve.	0.571	0.571	0.571	0.571	0.571	0.42	0.34	0.21	0	0.429	0.429	0.429	0.429	0.429	0.57	0.33	0.2	0	-0.142	-0.142	-0.142	-0.142	-0.142	0.15	-0.01	-0.01	0	B
157	13	d157s13	Leidet die halbe Bürogemeinschaft an Laktoseintoleranz?	Trpí polovicu kancelárskych priestorov neznášanlivosťou laktózy?	Trpí polovica kancelárskej spoločnosti na neznášanlivosť laktózy?	Trpí polovica obyvateľstva intoleranciou laktózy?	0.8	0.8	0.8	0.8	0.8	0.33	0	0	0	0.8	0.8	0.8	0.8	0.6	0.42	0.16	0	0	0	0	0	0	-0.2	0.09	0.16	0	0	B
157	15	d157s15	Eine Kollegin findet Milch eklig, der Kollege will sich insgesamt gesünder ernähren, und zwei Kolleginnen vermuten, dass sie Milch nicht vertragen.	Kolega nájdených mlieko nechutí, môj kolega chce jesť celkovo zdravšie a dvaja kolegovia naznačujú, že neznášajú mlieko.	Jednému kolegovi mlieko nechutí, druhý kolega chce jesť celkovo zdravšie a dvaja kolegovia sa domnievajú, že neznášajú mlieko.	Jednej kolegyni nechutí mlieko, druhý kolega sa chce zas zdravšie stravovať, a dvaja ďalší kolegovia sa domnievajú, že mlieko nedokážu stráviť.	0.524	0.714	0.714	0.714	0.667	0.52	0.05	0	0	0.333	0.571	0.571	0.571	0.524	0.61	0.25	0.1	0.05	-0.191	-0.143	-0.143	-0.143	-0.143	0.09	0.2	0.1	0.05	B
157	17	d157s17	Das passt zu dem, was die Ernährungswissenschaftlerin Imke Reese beobachtet:	To sa hodí k tomu, čo pozorovať výživu Imke Reese:	To sa týka toho, čo pozorovala odborníčka na výživu Imke Reese:	To súvisí s tým, čo skúma jedna odborníčka v stravovaní.	0.8	0.9	0.9	0.9	0.9	0.2	0	0	0	0.8	0.9	0.9	0.9	0.8	0.27	0	0	0	0	0	0	0	-0.1	0.07	0	0	0	B
157	19	d157s19	"Viele Menschen werten Symptome, die sie haben, sehr schnell als pathologisch."	"Mnoho ľudí hodnotí symptómy, ktoré majú veľmi rýchlo za patologické."	"Mnoho ľudí považujú symptómy, ktoré majú ako veľmi rýchlo patologické."	"Mnohí ľudia považujú príznaky, ktoré majú za veľmi rýchlo patologické."	0.4	0.6	0.6	0.6	0.5	0.6	0.22	0	0	0.4	0.4	0.4	0.4	0.3	0.6	0.33	0.12	0	0	-0.2	-0.2	-0.2	-0.2	0	0.11	0.12	0	B
157	20	d157s20	Doch auch wenn viele Menschen ohne gesicherte Diagnose auf bestimmte Lebensmittel verzichten, möchte sie die Symptome der Menschen nicht als leicht hysterische Modekrankheit abtun.	Ale aj keď mnoho ľudí vzdať niektorých potravín, bez toho aby potvrdenou diagnózou, to by nemal byť zamietnutý ako ľahko hysterický móde choroba príznaky ľudí.	Ale aj keď sa mnoho ľudí vzdá niektorých potravín, bez toho aby mali potvrdenú diagnózu, nechce tieto príznaky ľudí hodnotiť ako mierne hystericky módnu chorobu.	Aj keď veľa ľudí sa zrieka určitých potravín bez potvrdenej diagnózy, nechcú považovať tieto príznaky za ľahkú hysterickú módnu chorobu.	0.95	1	1	1	0.8	0.28	0.08	0	0	0.8	0.9	0.9	0.9	0.8	0.42	0.12	0	0	-0.15	-0.1	-0.1	-0.1	0	0.14	0.04	0	0	B
157	21	d157s21	"Viele, die glauben, dass sie krank sind, haben ja auch etwas."	"Mnohí z tých, ktorí veria, že sú chorí, tak niečo."	"Mnohí z tých, ktorí veria, že sú chorí, chorí aj skutočne sú."	"Veľa ľudí, ktorí veria, že sú chorí, aj trochu chorí sú.“	0.455	0.636	0.636	0.636	0.545	0.45	0.4	0.34	0.25	0.455	0.636	0.636	0.636	0.545	0.66	0.45	0.3	0.22	0	0	0	0	0	0.21	0.05	-0.04	-0.03	B
157	22	d157s22	Manchmal sei es aber schlicht ein falsches Ernährungsverhalten, das sich mithilfe eines Ernährungsprotokolls aufdecken ließe.	Niekedy je to ale jednoducho zlé stravovacie návyky, ktoré by mohli byť odkryté pomocou stravy protokolu.	Niekedy ale ide o jednoducho zlé stravovacie návyky, ktoré by mohli byť odhalené pomocou stravacieho protokolu.	Niekedy by však mohlo ísť práve o nesprávne stravovanie, ktoré sa dá doložiť prostredníctvom stravovacieho protokolu.	0.75	0.875	0.875	0.875	0.875	0.25	0	0	0	0.688	0.875	0.875	0.875	0.875	0.31	0	0	0	-0.062	0	0	0	0	0.06	0	0	0	B
157	24	d157s24	An Nahrungsmittelunverträglichkeiten leiden nach eigener Einschätzung mehr als 20 Prozent der Bevölkerung in Industrieländern.	Na potravinovej intolerancie trpí svojou vlastnou odhad, viac ako 20 percent populácie v priemyselne vyspelých krajinách.	Na potravinovú intoleranciu trpí podľa jednotlivých odhadov, viac ako 20 percent populácie v priemyselne vyspelých krajinách.	Potravinovou neznášanlivosťou trpí podľa niektorých odhadov až viac ako 20 percent obyvateľov žijúcich v priemyselných krajinách.	0.563	0.688	0.688	0.688	0.625	0.43	0.2	0.14	0.07	0.438	0.563	0.563	0.563	0.5	0.56	0.26	0.14	0.07	-0.125	-0.125	-0.125	-0.125	-0.125	0.13	0.06	0	0	B
157	25	d157s25	Nicht nur auf den Milchzucker Laktose, sondern auch auf Weizen und das in vielen Getreidearten enthaltene Klebereiweiß Gluten oder auf Fruchtzucker reagieren Menschen mit Bauchschmerzen, Blähungen oder Durchfall - oder auch mit heftigen Hautreaktionen, wenn sie Rotwein trinken, Nüsse oder Fisch essen.	reagujú nielen na mliečny cukor laktózu, ale aj na pšenicu a prítomný v mnohých obilninách lepku lepok alebo fruktózy ľuďom s bolesťou brucha, nadúvanie alebo hnačky - alebo závažné kožné reakcie pri pitie červeného vína, jesť orechy alebo ryby.	Nielen mliečny cukor - laktóza, ale aj pšenica a v mnohých obilninách prítomný lepok alebo fruktóza vyvolávajú ľuďom bolesť brucha, nadúvanie alebo hnačky - alebo závažné kožné reakcie spôsobuje aj pitie červeného vína, jedenie orechov alebo rýb.	Nejde však len o neznášanlivosť na mliečny cukor - laktózu, ale aj na pšeničnú múku a lepok - glutén, ktorý obsahujú viaceré druhy obilnín.	1	1	1	1	0.667	0.25	0.13	0.08	0.02	1	1	1	1	0.708	0.26	0.08	0.02	0	0	0	0	0	0.041	0.01	-0.05	-0.06	-0.02	B
158	1	d158s1	Snapchat goes public at $29bn and makes co-founders tech billionaires	Snapchat je sprístupnený verejnosti na $ 29 mld a robí spoluzakladatelia tech miliardárov	Snapchat je sprístupnený verejnosti za $ 29 mld a spravil spoluzakladatelia tech miliardárov	Snapchat išiel/vstúpil do verejnej dražby za 29 miliárd dolárov a spravil zo spoluzakladateľov tech miliardárov	0.667	0.667	0.667	0.667	0.667	0.33	0.07	0	0	0.533	0.6	0.6	0.6	0.6	0.46	0.14	0	0	-0.134	-0.067	-0.067	-0.067	-0.067	0.13	0.07	0	0	C
158	2	d158s2	Snap Inc, the company behind disappearing messaging app Snapchat, went public on Thursday at price that values the loss-making tech company at $29bn and catapulted its twentysomething co-founders into the top tier of tech billionaires.	Snap Inc, spoločnosť za miznúce aplikácie messaging snapchat, išiel verejnosť vo štvrtok za cenu, ktorá si cení stratové tech spoločnosť na $ 29 mld a katapultoval svoje twentysomething spoluzakladatelia do hornej vrstve tech miliardárov.	Snap Inc, spoločnosť, ktorá vytvorila aplikácu s miznúcimi správami Snapchat, išiel na verejnosť vo štvrtok za cenu $ 29 mld a katapultoval svojich 20 spoluzakladateľov do hornej vrstvy tech miliardárov.	Snap Inc,, teda spoločnosť, ktorá vytvorila Snapchat, aplikáciu s miznúcimi správami, išla/vstúpila vo štvrtok do verejnej dražby za cenu 29 miliárd dolárov. Zároveň tak táto stratová technologická spoločnosť katapultovala svojich približne 20 spoluzakladateľov medzi najbohatších tech miliardárov.	0.622	0.811	0.811	0.811	0.757	0.43	0.11	0	0	0.432	0.622	0.622	0.622	0.595	0.54	0.25	0.05	0	-0.19	-0.189	-0.189	-0.189	-0.162	0.11	0.14	0.05	0	C
158	3	d158s3	Shortly after Snap co-founders Evan Spiegel and Bobby Murphy rang the opening bell on the New York Stock Exchange, the company’s share price rose 41% from its guide price of $17 a share to an opening price of $24.	Krátko potom, čo Snap spoluzakladatelia Evan Spiegel a Bobby Murphy zazvonil na otvorenie zvon na New York Stock Exchange, cena akcií spoločnosti vzrástol o 41% zo svojho vodiaceho cenu $ 17 za akciu na otvárací cene 24 $.	Krátko potom, čo Snap spoluzakladatelia Evan Spiegel a Bobby Murphy vošli na New York Stock Exchange, cena akcií spoločnosti vzrástli o 41% zo svojej základnej ceny $ 17 za akciu na otváraciu cenu 24 $.	Krátko potom, čo spoluzakladatelia Snapu, Evan Spiegel a Bobby Murphy, uviedli/predstavili spoločnosť na Newyorskej burze, cena akcií vzrástla o 41% z pôvodných 17 dolárov za akciu na otváraciu cenu 24 dolárov za akciu.	0.485	0.697	0.697	0.697	0.545	0.55	0.27	0.13	0.05	0.364	0.576	0.576	0.576	0.485	0.6	0.38	0.24	0.15	-0.121	-0.121	-0.121	-0.121	-0.06	0.05	0.11	0.11	0.1	C
158	5	d158s5	The move gave a measure of comfort to investors who are expecting Snapchat’s sale to push a new generation of successful tech firms, including Uber and Airbnb, to list publicly.	Tento krok dal mieru komfortu pre investorov, ktorí očakávajú snapchat svoje predaja, aby sa zasadila novú generáciu úspešných technologických firiem, vrátane Uber a Airbnb, zoznam verejne.	Tento krok dal mieru komfortu pre investorov, ktorí očakávajú, že predaj snapchatu umožní novej generácii úspešných technologických firiem, vrátane Uber a Airbnb, aby išli do verejnej ponuky.	Tento krok dal/poskytol určitú mieru komfortu investorom, ktorí očakávajú, že predaj Snapchatu pomôže novej generácii úspešných technologických firiem, vrátane Uber a Airbnb, zverejniť sa/zviditeľniť sa.	0.48	0.6	0.6	0.6	0.56	0.53	0.36	0.2	0.17	0.36	0.4	0.4	0.4	0.36	0.66	0.53	0.4	0.33	-0.12	-0.2	-0.2	-0.2	-0.2	0.13	0.17	0.2	0.16	C
158	6	d158s6	Snap’s initial public offering (IPO) potentially creates a serious rival for Facebook, which has come to dominate social media and online advertising and has shown clear signs that it regards Snapchat as a potential threat.	IPO Snap je (IPO) potenciálne vytvára vážny súper pre Facebook, ktorý dnes dominuje sociálne médiá a online inzercie a ukázali jasné známky, že ide o snapchat ako potenciálny hrozba.	Pôbodná verejná ponaka na Snap potenciálne vytvára vážneho súpera pre Facebook, ktorý dnes dominuje sociálnym médiám a online inzercii a ukázali jasné známky, že ide o snapchat ako potenciálny hrozba.	Pôvodná verejná ponuka Snapu potenciálne vytvára vážneho súpera pre Facebook, ktorý dnes dominuje v oblasti sociálnych médií a online inzercie a taktiež ukázala jasné známky toho, že považuje Snapchat ako/za potenciálnu hrozba.	0.5	0.531	0.531	0.531	0.5	0.5	0.29	0.16	0.1	0.438	0.5	0.5	0.5	0.469	0.56	0.32	0.23	0.2	-0.062	-0.031	-0.031	-0.031	-0.031	0.06	0.03	0.07	0.1	C
158	14	d158s14	The sale of Snap, which Spiegel describes as a “camera company”, is the largest since Chinese e-commerce company Alibaba’s initial public offering in 2014.	Predaj Snap, ktorý Spiegel opisuje ako "spoločnosť kamery", je najväčší od čínskej e-commerce firmy Alibaba na burzu v roku 2014.	Predaj Snapu, ktorý Spiegel opisuje ako "spoločnosť kamery", je najväčší od uvedenia čínskej e-commerce firmy Alibaba na burzu v roku 2014.	Predaj Snapu, ktorý Spiegel opisuje ako "kamerovú spoločnosť", je najväčší obchod od uvedenia/predstavenia čínskej spoločnosti Alibaba na burzu/burze v roku 2014.	0.286	0.381	0.381	0.381	0.381	0.71	0.35	0.15	0.05	0.238	0.333	0.333	0.333	0.333	0.76	0.45	0.26	0.16	-0.048	-0.048	-0.048	-0.048	-0.048	0.05	0.1	0.11	0.11	C
159	1	d159s1	Minnesota Vikings' new glass-plated stadium becomes 'death trap' for birds.	Minnesota Vikings "novým sklo-á štadión sa stáva" death trap "pre vtáky.	Nový sklenený štadión Minnesota Vikings sa stáva smrtiacou pascou pre vtáky.	Nový presklený štadión tímu Minnesota Vikings je smrtonosnou pascou pre vtáctvo.	0.636	0.909	0.909	0.909	0.818	0.36	0.1	0	0	0.455	0.545	0.545	0.545	0.545	0.54	0.2	0	0	-0.181	-0.364	-0.364	-0.364	-0.273	0.18	0.1	0	0	E
159	2	d159s2	The US Bank Stadium in Minneapolis, which opened last June and cost more than $1bn of mostly taxpayer money, is beautiful, large, glassy â€“ and deadly to birds.	Banka Stadium US v Minneapolis, ktoré bolo otvorené vlani v júni a stáť viac ako 1 miliardu $ väčšinou peňazí daňových poplatníkov, je krásny, veľký, sklený â € "a smrtiace pre vtáky.	US Bank Stadium v Minneapolise, ktorý bol otvorený vlani v júni a stál viac ako 1 miliardu dolárov, viac-menej z peňazí daňových poplatníkov, je krásny, veľký, sklenený, a smrtiace pre vtáky.	V júni minulého roku bol v Minneapolise postavený US Bank Stadium. Stál niečo cez miliardu dolárov, z čoho väčšinu poskytli daňoví poplatníci, a je krásny, majestátny, celý presklený... a smrtiaci pre vtáky.	0.625	0.875	0.875	0.875	0.813	0.37	0.09	0	0	0.438	0.813	0.813	0.813	0.688	0.56	0.22	0.03	0	-0.187	-0.062	-0.062	-0.062	-0.125	0.19	0.13	0.03	0	E
159	3	d159s3	A new report from a trio of conservation groups reveals that â€“ for wildlife, at least â€“ vast swathes of the new home of the Minnesota Vikings are indistinguishable from the sky and birds are being killed by flying straight into the stadiumâ€™s 200,000 sq ft of gleaming, clear glass.	Nová správa z trojice ochranných skupín ukazuje, že â € "pre divokú zver, aspoň â €" obrovské pruhy nového domov Minnesota Vikings sú na nerozoznanie od neba a vtáky sú zabíjaní tým, že letí priamo do stadiumâ € ™ s 200.000 štvorcových stôp žiariace, číre sklo.	Nová správa z trojice ochranných skupín ukazuje, že - aspoň pre zver - sú obrovské pruhy nového domova Minnesota Vikings na nerozoznanie od neba a vtáky sú zabíjané tým, že letia priamo do štadiónu z 200.000 štvorcovými stopami žiariaceho, číreho skla.	Tri ochranárske skupiny v novej výskumnej správe poukazujú na rozľahlé sklenené plochy pokrývajúce takmer 200000 m2 na novom domove Minnesotských Vikingov, ktoré sú pre vtáctvo nerozoznateľné od odrážajúcej sa oblohy, a pri priamom náraze do nich vtáky často zomierajú.	0.974	1	1	1	0.897	0.17	0	0	0	0.846	1	1	1	0.923	0.19	0	0	0	-0.128	0	0	0	0.026	0.02	0	0	0	E
159	4	d159s4	As CityPages, a local Twin Cities newspaper, put it: â€oCreatures crash into it like something out of an Alfred Hitchcock movie.â€	Ako CityPages, miestne Twin Cities noviny, dať to: â € oCreatures zrážke do neho ako niečo z Alfreda Hitchcocka movie.â €	Ako vravia CityPages, miestne Twin Cities noviny: "Narážky vtákov do neho sú ako niečo z filmu Alfreda Hitchcocka."	"Je to ako z Hitchcocka - vtáky vlietajú strmhlav priamo do stien budovy," píše sa v CityPages, miestnych novinách regiónu Twin Cities.	0.636	1	1	1	0.864	0.4	0.04	0	0	0.682	0.955	0.955	0.955	0.864	0.36	0.04	0	0	0.046	-0.045	-0.045	-0.045	0	-0.04	0	0	0	E
159	5	d159s5	Over an 11-week period in the autumn, bird enthusiasts undertook regular circuits of the stadium, and discovered 60 dead birds, and another 14 stunned from flying into the glass.	Po dobu 11 týždňov na jeseň, nadšenci vták podnikol pravidelné obvody štadióne, a objavil 60 mŕtvych vtákov a ďalších 14 ohúrený z lietania do pohára.	Po dobu 11 týždňov na jeseň vtákoví nadšenci podnikli pravidelné obhliadky štadiónu, a objavili 60 mŕtvych vtákov, a ďalších 14 omráčených z lietania do skla.	Na jeseň podnikali ochranári pravidelné obhliadky okolo štadióna, kedy počas 11-týždňového obdobia našli 60 mŕtvych jedincov a ďalších 14 nehybných, omráčených po náraze do skla.	0.6	0.8	0.8	0.8	0.72	0.44	0.16	0.04	0	0.48	0.72	0.72	0.72	0.6	0.56	0.25	0.04	0	-0.12	-0.08	-0.08	-0.08	-0.12	0.12	0.09	0	0	E
159	6	d159s6	The report said that would project to at least 360 deaths over a three-year period, but that number â€osignificantly underestimates true mortality at the stadium complex, because it does not include birds removed by maintenance staff, security guards, and scavengers.â€	V správe uviedol, že by sa premietnuť do najmenej 360 mŕtvych po dobu troch rokov, ale toto číslo â € osignificantly podhodnocuje skutočnú úmrtnosť na štadióne komplex, pretože nezahŕňa vtáky odobraté udržiavacie personál, bezpečnostnej stráže a scavengers.â €	V správe uviedli, že sa to premietne do najmenej 360 mŕtvych vtákov po dobu troch rokov, ale toto číslo značne podhodnocuje skutočnú úmrtnosť na štadióne, pretože nezahŕňa vtáky odstránené udržiavacím personálom, bezpečnostnou strážou a návštevníkmi.	Podľa týchto nálezov konštatujú minimálne 360 mŕtvych vtákov za tri roky, no podotýkajú, že toto číslo nie je úplne presné - neráta totiž s telami vtákov, ktoré mohli byť medzi časom odstránené personálom štadiónu, členmi bezpečnostnej služby či upratovačmi.	0.846	1	1	1	0.897	0.15	0.05	0	0	0.769	0.949	0.949	0.949	0.846	0.2	0.07	0.02	0	-0.077	-0.051	-0.051	-0.051	-0.051	0.05	0.02	0.02	0	E
159	7	d159s7	In 2014, the Audubon Society predicted that the stadiumâ€™s distinctive clear glass would prove to be a â€odeath trapâ€? for Minnesotaâ€™s local and migratory birds.	V roku 2014 sa Audubon Society predpovedal, že stadiumâ € ™ s výraznou z číreho skla by dokázal byť â € odeath Trapa € za Minnesotaâ € ™ s miestnou a sťahovavých vtákov.	V roku 2014 Audubon Society predpovedala, že štadión s výrazne čírym sklom bude smrtiacou pascou pre Minnesottských miestnych a sťahovavých vtákov.	Prírodovedecká spoločnosť Audubon Society už v roku 2014 predpovedala, že osobité sklenené steny štadiónu v Minnesote budú znamenať smrť pre miestne, ako aj sťahovavé vtáctvo.	1	1	1	1	0.92	0.18	0.09	0.03	0	0.64	0.84	0.84	0.84	0.8	0.32	0.16	0.04	0	-0.36	-0.16	-0.16	-0.16	-0.12	0.14	0.07	0.01	0	E
159	8	d159s8	The society pushed authorities to introduce changes so the birds could distinguish between the stadium and the sky. â€oWe know the people of Minnesota do not want their money killing birds,â€? the society said.	Spoločnosť tlačil orgány zaviesť zmeny, aby vtáky mohli rozlišovať medzi štadióne a na oblohe. â € oWe vedia ľudia z Minnesoty nechcú svoje peniaze usmrcovania vtákov, â € spoločnosť povedal.	Spoločnosť tlačila na orgány aby zaviedli zmeny, aby vtáky mohli rozlišovať medzi štadiónom a oblohou."Vieme, že ľudia z Minnesoty nechcú svojimi peniazmi usmrcovať vtákov," povedala spoločnosť.	Spoločnosť naliehala na príslušné orgány, aby schválili zmeny pomáhajúce vtáctvu rozoznávať medzi štadiónom a oblohou. "Vieme, že obyvatelia Minnesoty nechcú, aby ich peniaze zabíjali vtáky," vravia.	0.692	1	1	1	0.808	0.4	0.03	0	0	0.5	0.654	0.654	0.654	0.654	0.53	0.16	0.04	0	-0.192	-0.346	-0.346	-0.346	-0.154	0.13	0.13	0.04	0	E
159	9	d159s9	But the Minnesota Sports Facilities Authority, which owns the stadium, declined to take any steps, such as installing glass with a visible pattern, as happened at the Javits Center in Manhattan.	Ale Minnesota Športové areály Authority, ktorá je vlastníkom štadióna, odmietol prijať všetky opatrenia, ako je inštalácia skla s viditeľným vzorom, ako sa to stalo v Javits Center na Manhattane.	Ale Minnesotské Športové Areály, ktoré sú vlastníkom štadióna, odmietli prijať všetky opatrenia, ako je inštalácia skla s viditeľným vzorom, ako sa to stalo v Javits Center v Manhattane.	Majiteľ štadiónu však odmietol podniknúť akékoľvek kroky k zlepšeniu situácie. Takýmto krokom by mohlo byť napríklad použitie skla s jasne viditeľným vzorom, podobne ako v Manhattanskom Javits Center,	0.714	0.893	0.893	0.893	0.75	0.34	0.1	0	0	0.714	0.893	0.893	0.893	0.75	0.35	0.11	0	0	0	0	0	0	0	0.01	0.01	0	0	E
159	10	d159s10	The Javits changes quickly led a 90% decrease in bird collisions.	Javits sa mení rýchlo viedol k poklesu o 90% v vtáčích kolízií.	Javitské zmeny rýchlo viedli k poklesu vtáčích kolízií o 90%.	kde takéto zmeny znížili nárazy vtákov o 90%.	1	1	1	1	0.875	0.16	0.09	0	0	0.875	1	1	1	0.625	0.3	0.11	0	0	-0.125	0	0	0	-0.25	0.14	0.02	0	0	E
159	11	d159s11	Jim Sharpsteen, a volunteer who helped to conduct the stadium study, told CityPages: â€oWe knew that the glass would be highly confusing to the birds.	Jim Sharpsteen, dobrovoľník, ktorý pomohol vykonať štúdiu štadióne, povedal CityPages: â € oWe vedel, že sklo by bolo veľmi mätúce pre vtáky.	Jim Sharpsteen, dobrovoľník, ktorý pomohol vykonať štúdiu štadiónu, povedal CityPages: "Vedeli sme, že sklo by bolo veľmi mätúce pre vtáky.	"Vedeli sme, že sklo bude pre vtáky veľmi mätúce," vraví pre magazín CityPages Jim Sharpsteen, jeden z asistujúcich dobrovoľníkov.	0.632	1	1	1	0.737	0.4	0.19	0	0	0.421	1	1	1	0.684	0.55	0.31	0.11	0.05	-0.211	0	0	0	-0.053	0.15	0.12	0.11	0.05	E
159	12	d159s12	They see a reflection of a blue sky in the glass, they think itâ€™s a blue sky.	Vidí odraz modrou oblohou v skle, si myslí, že ita € ™ sa modrá obloha.	Vidia odraz modrej oblohy v skle a myslia si, že to je modrá obloha.	"Vidia v skle odraz modrej oblohy a myslia si, že je ozajstná.	0.833	1	1	1	0.833	0.33	0.07	0	0	0.25	0.583	0.583	0.583	0.5	0.78	0.46	0.25	0.09	-0.583	-0.417	-0.417	-0.417	-0.333	0.45	0.39	0.25	0.09	E
159	13	d159s13	They see reflections of trees, they think they can land in those reflections of trees.	Vidí odrazy stromov, si myslí, že môže pristáť v tých odrazy stromov.	Vidia odrazy stromov a myslia si, že môžu pristáť v tých odrazoch stromov.	Vidia odrazy stromov a myslia si,že v nich môžu pristáť.	0.8	0.9	0.9	0.9	0.7	0.5	0.18	0	0	0.5	0.7	0.7	0.7	0.4	0.69	0.41	0.27	0.2	-0.3	-0.2	-0.2	-0.2	-0.3	0.19	0.23	0.27	0.2	E
159	14	d159s14	This confirmed what we already believed would be bad.â€	Táto skutočnosť potvrdzuje to, čo už sme verili by bad.â €	Táto skutočnosť potvrdzuje to, čo už sme verili že bude zlé.	Náš výskum len potvrdzuje to, pred čím sme dopredu varovali," vysvetľuje.	0.727	0.818	0.818	0.818	0.727	0.27	0.1	0	0	0.727	0.818	0.818	0.818	0.727	0.27	0.1	0	0	0	0	0	0	0	0	0	0	0	E
159	15	d159s15	Sharpsteen said: â€oWe want them to either replace the glass with a less reflective glass or put a coating on the glass that would make it more bird friendly.	Sharpsteen povedal: â € oWe chcieť, aby buď nahradiť sklo s menej reflexného skla alebo dať povlaku na skle, že by s väčšou vták priateľský.	Sharpsteen povedal: "Chceme, aby buď nahradili sklo menej reflexným sklom alebo dali na sklo vrstvu priateľskú k vtákom.	"Žiadame výmenu všetkých sklenených plôch za plochy s menej reflexným sklom, alebo nasadenie špeciálnej vrstvy, ktorá by bola ku vtáctvu ohľaduplnejšia.	1	1	1	1	0.857	0.2	0.04	0	0	0.81	0.81	0.81	0.81	0.762	0.19	0.15	0.1	0.05	-0.19	-0.19	-0.19	-0.19	-0.095	-0.01	0.11	0.1	0.05	E
159	16	d159s16	I think the more realistic would be to apply coating to the outside of the glass.â€	Myslím, že realistickejšie bude aplikovať povlak na vonkajšej strane glass.â €	Myslím, že realistickejšie bude aplikovať vrstvu na vonkajšiu stranu skla.	Reálnejšia sa mi však zdá tá druhá možnosť."	1	1	1	1	1	0	0	0	0	1	1	1	1	1	0	0	0	0	0	0	0	0	0	0	0	0	0	E
159	17	d159s17	Another study is being commissioned, but that wonâ€™t be finished until 2019.	Ďalšie štúdie je práve uvádzaný do prevádzky, ale to wona € ™ t byť dokončený do roku 2019.	Ďalšia štúdia je práve uvádzaná do prevádzky, ale tá bude dokončená až v roku 2019.	Aktuálne prebieha ďalšia štúdia, ktorá však prinesie výsledky až v roku 2019.	1	1	1	1	0.833	0.11	0.05	0	0	0.75	0.917	0.917	0.917	0.583	0.4	0.28	0.15	0.08	-0.25	-0.083	-0.083	-0.083	-0.25	0.29	0.23	0.15	0.08	E
159	18	d159s18	Failure to act will â€oestablish US Bank Stadium as the top bird-killing building in the Twin Cities,â€? the report said.	Nečinnosť bude banka štadión € oestablish USA ako najlepší vtáka zabíjanie budovy v mestách dvojčaťa, â € píše sa v správe.	Nečinnosť urobí z US Bank Stadium "najlepšiu budovu na zabíjanie vtákov v Twin Cities," píše sa v správe.	Výskumy vravia, že pokiaľ sa nepodniknú vhodné opatrenia, US Bank Stadium sa pre vtáctvo stane najsmrteľnejšou budovou v celom Twin Cities regióne.	0.864	1	1	1	0.909	0.13	0	0	0	0.636	0.864	0.864	0.864	0.727	0.36	0.14	0.05	0	-0.228	-0.136	-0.136	-0.136	-0.182	0.23	0.14	0.05	0	E
160	1	d160s1	Snap’s revenues last year were just a fraction of Facebook’s $27.6bn.	Výnosy Snap vlani boli len zlomkom Facebook je $ 27.6bn.	Výnosy Snapu vlani boli len zlomkom výnosov Facebooku, ktorý zarobil $ 27.6bn.	Snap zarobil minulý rok len zlomok z 27,6 miliardového výnosu Facebooku.	0.818	0.909	0.909	0.909	0.818	0.18	0	0	0	0.818	1	1	1	0.818	0.25	0	0	0	0	0.091	0.091	0.091	0	0.07	0	0	0	C
160	2	d160s2	Nor, unlike its far larger rival, is it profitable.	Rovnako tak, na rozdiel od jeho oveľa väčší súper, je to výhodné.	Rovnako tak ako jeho oveľa väčší súper, je ziskový.	I keď sa zárobok nedá porovnať so zárobkami protivníkov, stále je výnosný.	0.917	1	1	1	0.917	0.08	0	0	0	0.917	0.917	0.917	0.917	0.833	0.08	0	0	0	0	-0.083	-0.083	-0.083	-0.084	0	0	0	0	C
160	3	d160s3	But Sir Martin Sorrell, chief executive of WPP, the world’s largest advertising company, called Snapchat “very important” and said:	Ale Sir Martin Sorrell, generálny riaditeľ WPP, najväčšej svetovej reklamná spoločnosť, s názvom snapchat "veľmi dôležité" a povedal:	Ale Sir Martin Sorrell, generálny riaditeľ WPP, najväčšej svetovej reklamnej spoločnosti, nazval snapchat "veľmi dôležitým" a povedal:	Martin Sorrell, generálny riaditeľ WPP, najväčšej svetovej reklamnej spoločnosti, nazval Snapchat "veľmi dôležitým" a povedal:	0.467	0.467	0.467	0.467	0.4	0.61	0.47	0.31	0.26	0.133	0.133	0.133	0.133	0.067	0.88	0.87	0.86	0.85	-0.334	-0.334	-0.334	-0.334	-0.333	0.27	0.4	0.55	0.59	C
160	4	d160s4	“I think it’s a defining moment in that it could well be the third force” against Google and Facebook.	"Myslím, že je určujúci okamih v tom, že by pokojne mohol byť tretia sila" proti spoločnosti Google a Facebook.	"Myslím, že je určujúci okamih v tom, že by pokojne mohol byť tretia sila" za spoločnosťami Google a Facebook.	"Myslím si, že ide rozhodujúci okamih, v ktorom sa Snapchat môže stať treťou veľmocou" hneď Googlom a Facebookom.	0.778	0.833	0.833	0.833	0.778	0.31	0.05	0	0	0.778	0.833	0.833	0.833	0.778	0.31	0.05	0	0	0	0	0	0	0	0	0	0	0	C
160	5	d160s5	Sign up to the new-look Media Briefing: bigger, better, brighter	Zaregistrujte sa na novom vzhľade Media Briefing: väčšie, lepšie, jasnejšie	Zaregistrujte sa na Media Briefing s novým vzhľadom: je väčší, lepší, jasnejší	Zaregistrujte sa na vynovený Media Brífing: väčší, lepší, jasnejší.	0.667	0.667	0.667	0.667	0.667	0.4	0.22	0.12	0	0.667	0.778	0.778	0.778	0.444	0.5	0.27	0.1	0	0	0.111	0.111	0.111	-0.223	0.1	0.05	-0.02	0	C
160	6	d160s6	Read more	Čítaj viac	Čítajte viac	Čítajte viac	0.5	0.5	0.5	0.5	0	0.5	0	0	0	0	0	0	0	0	1	1	0	0	-0.5	-0.5	-0.5	-0.5	0	0.5	1	0	0	C
160	7	d160s7	“The stock market conditions are good, there’s cash available on the sidelines so the market will welcome an offering like this,” said Josef Schuster, founder of IPOX Schuster, the index provider.	"Akciový trh podmienky sú dobré, je tu hotovosť k dispozícii na vedľajšiu koľaj, takže na trhu uvítajú ponuku, ako je tento," povedal Josef Schuster, zakladateľ IPOX Schuster, poskytovateľa indexu.	"Podmienky na akciovom trhu sú dobré, je tu hotovosť k dispozícii pomimo, takže na trhu uvítajú ponuku, ako je táto," povedal Josef Schuster, zakladateľ IPOX Schuster, poskytovateľa indexu.	"Podmienky akciového trhu sú dobré, k dispozícii je hotovosť pomimo, takže trh takúto ponuku uvíta," povedal Josef Schuster, zakladateľ poskytovateľa indexov IPOX Schuster.	0.478	0.826	0.826	0.826	0.609	0.65	0.21	0.07	0.03	0.435	0.739	0.739	0.739	0.565	0.71	0.29	0.11	0.04	-0.043	-0.087	-0.087	-0.087	-0.044	0.06	0.08	0.04	0.01	C
160	8	d160s8	“Investors are optimistic about the company’s revenue growth, so while there’s some uncertainty, they still want this stock in their portfolio.”	"Investori sú optimistickí ohľadom rastu tržieb spoločnosti, takže aj keď je tu určitá neistota, ale napriek tomu chcú túto populáciu vo svojom portfóliu."	"Investori sú optimistickí ohľadom rastu tržieb spoločnosti, takže aj keď je tu určitá neistota, ale napriek tomu chcú túto položku vo svojom portfóliu."	"Investori sú optimistickí vďaka rastu tržieb spoločnosti, takže zatiaľ čo je tu určitá neistota, aj napriek tomu chcú položku vo svojom portfóliu."	0.227	0.273	0.273	0.273	0.273	0.78	0.54	0.33	0.1	0.182	0.227	0.227	0.227	0.227	0.82	0.59	0.38	0.15	-0.045	-0.046	-0.046	-0.046	-0.046	0.04	0.05	0.05	0.05	C
160	9	d160s9	But others expressed wariness.	Ale iní vyjadrili nedôveru.	Ale iní vyjadrili nedôveru.	Iní zasa vyjadrili nedôveru.	0.25	0.5	0.5	0.5	0.25	0.75	0.33	0	0	0.25	0.5	0.5	0.5	0.25	0.75	0.33	0	0	0	0	0	0	0	0	0	0	0	C
160	10	d160s10	“While the company’s optimism for its potential growth makes sense given the trajectory of previous social media darlings, there’s reason for caution,” said Jessica Liu at Forrester Research.	"Kým optimizmus spoločnosti pre jej potenciálneho rastu dáva zmysel vzhľadom k trajektórii predošlých sociálnych médií miláčikov, že je dôvod k opatrnosti," povedala Jessica Liu spoločnosti Forrester Research.	"Kým optimizmus spoločnosti pre jej potenciálny rast dáva zmysel vzhľadom k trajektórii predošlých sociálnych médií, je dôvod k opatrnosti," povedala Jessica Liu na Forrester Research.	"I keď optimistický prístup spoločnosti k jej potenciálnemu rastu je opodstatnený vďaka množstvu predošlých miláčikov sociálnych médií, stále sa nájde dôvod k opatrnosti," povedala Jessica Liu z firmy Forrester Research.	0.433	0.567	0.567	0.567	0.533	0.6	0.24	0.14	0.11	0.5	0.6	0.6	0.6	0.567	0.5	0.24	0.14	0.11	0.067	0.033	0.033	0.033	0.034	-0.1	0	0	0	C
160	11	d160s11	“First, Facebook’s success is an anomaly.	"Po prvé, úspech Facebooku je anomália.	"Po prvé, úspech Facebooku je anomália.	"Po prvé, úspech Facebooku je nezrovnateľný.	0.167	0.167	0.167	0.167	0.167	0.83	0.8	0.75	0.66	0.167	0.167	0.167	0.167	0.167	0.83	0.8	0.75	0.66	0	0	0	0	0	0	0	0	0	C
160	12	d160s12	Second, while Snapchat has a grasp on mobile video, it’s TV-like revenue pursuit is new and untested.	Po druhé, zatiaľ čo snapchat má pochopenie pre mobilné video, je to TV-like príjmy prenasledovanie je nová a nevyskúšané.	Po druhé, zatiaľ čo snapchat sa venuje mobilnému videu, je to práve aplikácia podobná TV, ktorá je nová a nevyskúšaná.	Po druhé, zatiaľ čo Snapchat nie je žiadnym nováčikom v oblasti mobilného videa, funkcia podobná televízii, ktorá má dopomôcť k vyšším výnosom je nová a nevyskúšaná.	0.615	0.692	0.692	0.692	0.692	0.38	0.24	0.17	0.09	0.538	0.577	0.577	0.577	0.577	0.46	0.28	0.21	0.13	-0.077	-0.115	-0.115	-0.115	-0.115	0.08	0.04	0.04	0.04	C
160	13	d160s13	Snapchat has much room for improvement in the areas of user growth and delivering data and measurement to advertisers in order to live up to its high expectations.”	Snapchat má veľa priestoru na zlepšenie v oblasti rastu užívateľov a doručovanie dát a merania pre inzerentov, aby žil až do jeho vysoké očakávania. "	Snapchat má veľa priestoru na zlepšenie v oblasti rastu užívateľov, doručovania dát a merania pre inzerentov, aby splnili jeho vysoké očakávania."	Snapchat má veľa priestoru na zlepšenie v oblasti rastu počtu užívateľov doručovania dát a služieb pre inzerentov, aby tak splnil svoje vysoké očakávania."	0.304	0.348	0.348	0.348	0.348	0.75	0.52	0.36	0.28	0.217	0.217	0.217	0.217	0.217	0.78	0.63	0.48	0.35	-0.087	-0.131	-0.131	-0.131	-0.131	0.03	0.11	0.12	0.07	C
161	1	d161s1	Google is suing Uber for allegedly stealing the technology behind its self-driving cars.	Google žaluje Uber pre údajnú krádež technológie za svojimi samořiditelným automobilom.	Google žaluje Uber kvôli údajnej krádeži technológie ich autonómnych áut.	Google žaluje Uber, ktorý im údajne ukradol technológiu autonómnych áut.	0.9	0.9	0.9	0.9	0.9	0.18	0.1	0	0	0.6	0.6	0.6	0.6	0.6	0.4	0.22	0	0	-0.3	-0.3	-0.3	-0.3	-0.3	0.22	0.12	0	0	B
161	2	d161s2	The search giant, which has been working on driverless vehicles since 2009, has filed a lawsuit claiming Uber stole trade secrets and is using them in its autonomous cars.	Vyhľadávací gigant, ktorý pracuje na vozidlách bez vodiča od roku 2009, podal žalobu vyhlasovať Uber ukradol obchodné tajomstvo a ich použitie vo svojich autonómnych vozidiel.	Vyhľadávací gigant, ktorý pracuje na vozidlách bez vodiča od roku 2009, podal žalobu na Uber pre krádež ich obchodného tajomstva a jeho použitie vo svojich autonómnych vozidlách.	Vyhľadávací gigant, ktorý pracuje na projekte áut bez vodiča už od roku 2009, podal žalobu na Uber pre krádež obchodného tajomstva a jeho použitie v ich autonómnych autách.	0.357	0.429	0.429	0.429	0.429	0.6	0.33	0.23	0.16	0.179	0.25	0.25	0.25	0.25	0.82	0.63	0.5	0.4	-0.178	-0.179	-0.179	-0.179	-0.179	0.22	0.3	0.27	0.24	B
161	3	d161s3	If the Google lawsuit is successful, Uber could be blocked from using the technology powering its self-driving cars, which are currently being trialled in Arizona.	V prípade, že súd Google je úspešný, Uber mohlo byť blokované pomocou technológie napájania jeho self-riadiť vozidlá, ktoré sú v súčasnej dobe vyskúšané v Arizone.	V prípade, že Google súdny spor vyhrá, Uberu bude zakázané používať technológiu nabíjania ich autonómnych áut, ktoré v súčasnej dobe testujú v Arizone.	Ak Google súdny spor vyhrá, Uber už nebude môcť používať technológiu nabíjania ich autonómnych áut, ktorú práve testujú v Arizone.	1	1	1	1	0.85	0.24	0.04	0	0	0.5	0.55	0.55	0.55	0.4	0.65	0.45	0.33	0.2	-0.5	-0.45	-0.45	-0.45	-0.45	0.41	0.41	0.33	0.2	B
161	4	d161s4	The brains behind Uber's autonomous car fleet come from Otto, a self-driving truck startup founded by former Google employees, which Uber bought for $680 million (L543m) last year.	Mozgom Uber autonómnym vozového parku pochádzajú z Otto, uvedenie do prevádzky kamiónu self-hnacie založili bývalí zamestnanci spoločnosti Google, ktorý minulý rok Uber kúpil za 680 miliónov $ (L 543 m).	S nápadom autonómneho vozidla Uberu prišiel Otto, startupová spoločnosť zaoberajúca sa vývojom systémov samoriadiacich kamiónov. Spoločnosť založili bývalí zamestnanci Google, ktorí minulý rok odkúpili Uber za viac ako 640 miliónov eur.	Za nápadom autonómneho vozidla Uberu stojí startupová spoločnosť Otto, zaoberajúca sa vývojom systémov samoriadiacich kamiónov. Spoločnosť založili bývalí zamestnanci Google, ktorí minulý rok kúpili Uber za viac ako 640 miliónov eur.	0.645	0.806	0.806	0.806	0.742	0.35	0.1	0.03	0	0.065	0.161	0.161	0.161	0.129	0.9	0.76	0.65	0.57	-0.58	-0.645	-0.645	-0.645	-0.613	0.55	0.66	0.62	0.57	B
161	5	d161s5	Google is claiming that before leaving Otto's founders stole designs for its proprietary technology.	Google tvrdí, že pred opustením Ottove zakladatelia ukradla plány na jeho patentovanej technológie.	Google tvrdí, že zakladatelia Otta ukradli ich koncepty ešte pred odchodom z firmy.	Google tvrdí, že zakladatelia starupu Otto ukradli ich koncepty pre ich vlastné technológie.	0.615	0.692	0.692	0.692	0.692	0.38	0.16	0.09	0	0.385	0.538	0.538	0.538	0.538	0.53	0.41	0.27	0.1	-0.23	-0.154	-0.154	-0.154	-0.154	0.15	0.25	0.18	0.1	B
161	6	d161s6	"We're taking legal action against Otto and its parent company Uber for misappropriating Waymo trade secrets and infringing our patents," said Waymo, the driverless car division of Google's parent Alphabet.	"Berieme právne kroky proti Otto a jej materská spoločnosť Uber za zneužitie Waymo obchodné tajomstvo a porušuje naše patenty," povedal Waymo sa riadiaceho vozňa divízia spoločnosti Google rodičia abecedy.	"Podnikli sme právne kroky proti spoločnosti Otto a jej materskej spoločnosti Uber za zneužitie obchodného tajomstva Waymo a porušenie nášho patentu," povedal Waymo, spoločnosť zo skupiny Alphabet patriaca Google, ktorá sa zaoberá vývojom autonómnych áut.	„Podnikli sme právne kroky proti spoločnosti Otto a ich materskej spoločnosti Uber vo veci spreneverenia obchodných tajomstiev Waymo a porušenia našich patentov, vyhlásila Waymo, spoločnosť zo skupiny Alphabet patriaca Google, ktorá sa zaoberá vývojom autonómnych áut.	0.611	0.75	0.75	0.75	0.722	0.36	0.08	0.02	0	0.306	0.306	0.306	0.306	0.278	0.69	0.6	0.5	0.42	-0.305	-0.444	-0.444	-0.444	-0.444	0.33	0.52	0.48	0.42	B
161	7	d161s7	"Our parent company Alphabet has long worked with Uber in many areas and we didn't make this decision lightly.	"Naša materská spoločnosť Abeceda dlhodobo spolupracuje s Uber v mnohých oblastiach a nemali toto rozhodnutie brať na ľahkú váhu.	"Naša materská spoločnosť Abeceda dlhodobo spolupracuje s Uberom v mnohých oblastiach, a preto to bolo ťažké rozhodnutie.	„Naša rodičovská spoločnosť Alphabet už dlhodobo spolupracuje s Uberom v mnohých oblastiach, a preto to bolo ťažké rozhodnutie.“	0.667	0.722	0.722	0.722	0.611	0.36	0.16	0.05	0	0.278	0.278	0.278	0.278	0.222	0.72	0.64	0.62	0.6	-0.389	-0.444	-0.444	-0.444	-0.389	0.36	0.48	0.57	0.6	B
161	8	d161s8	"However, given the overwhelming facts that our technology has been stolen, we have no choice but to defend our investment and development of this unique technology."	"Vzhľadom na to, že prevažná skutočnosti, že naša technológia bola odcudzená, nemáme inú možnosť, než sa brániť našu investícií a rozvoja tejto jedinečnej technológie."	"Vzhľadom na to, že naša technológia bola ukradnutá, nemáme inú možnosť, len brániť našu investíciu a rozvoj tejto jedinečnej technológie."	„Avšak vzhaľadom na to, že našu technológiu ukradli musíme brániť naše investícia a vývoj tejto jedinečnej technológie.“	0.941	1	1	1	0.588	0.37	0.13	0.04	0	0.706	0.824	0.824	0.824	0.588	0.4	0.15	0.05	0	-0.235	-0.176	-0.176	-0.176	0	0.03	0.02	0.01	0	B
161	9	d161s9	Google alleges Otto's founder Anthony Levandowski, a former Google employee, downloaded reams of sensitive information before his departure and used it to develop his own version.	Google tvrdí, Ottov zakladateľ Anthony Levandowski, bývalý zamestnanec Google, stiahnuť kvantá citlivých informácií pred jeho odchodom a používal to, aby rozvíjať svoju vlastnú verziu.	Google tvrdí, že zakladateľ Otta Anthony Levandowski, bývalý zamestnanec Google, pred svojím odchodom stiahol kvantá citlivých informácií, aby rozvíjal svoju vlastnú verziu.	Podľa Google zakladateľ Otto a bývalý zamestnanec Google Anthony Levandowski pred svojím odchodom stiahol množstvo dokumentov obsahujúcich tajné informácie a použil ich na vývoj vlastnej verzie projektu.	0.593	0.852	0.852	0.852	0.741	0.37	0.11	0.04	0	0.593	0.815	0.815	0.815	0.741	0.4	0.23	0.12	0.04	0	-0.037	-0.037	-0.037	0	0.03	0.12	0.08	0.04	B
161	10	d161s10	"We found that six weeks before his resignation this former employee, Anthony Levandowski, downloaded over 14,000 highly confidential and proprietary design files for Waymo's various hardware systems," Google said.	"Zistili sme, že šesť týždňov pred jeho rezignáciu tento bývalý zamestnanec, Anthony Levandowski, stiahnutý už viac ako 14.000 vysoko dôverných a proprietárnych súborov návrhu z hľadiska rôznych hardvérových systémov Waymo," uviedol Google.	"Zistili sme, že šesť týždňov pred jeho rezignáciou tento bývalý zamestnanec, Anthony Levandowski, stiahol z počítača viac ako 14 000 vysoko dôverných súborov s návrhmi dizajnu zo systému Waymo," uviedol Google.	„Zistili sme, že šesť týždňov pred rezignáciou bývalý zamestnanec, Anthony Levandowski, stiahol do svojho notebooku viac ako 14 000 dôverných dokumentov, ako aj dizajnových súborov zo systému spoločnosti Waymo,“ tvrdí Google.	0.548	0.677	0.677	0.677	0.581	0.43	0.25	0.16	0.1	0.323	0.484	0.484	0.484	0.452	0.64	0.4	0.27	0.17	-0.225	-0.193	-0.193	-0.193	-0.129	0.21	0.15	0.11	0.07	B
161	11	d161s11	"He downloaded 9.7GB of Waymo's highly confidential files and trade secrets, including blueprints, design files and testing documentation."	"On stiahnuť 9,7GB vysoko dôverných súborov Waymo a obchodného tajomstva, vrátane plánov, dizajn súbory a dokumentáciou testu."	"Stiahol 9,7GB vysoko dôverných súborov Waymo a obchodné tajomstvo, vrátane plánov, dizajnových súborov a testovacej dokumentácie."	„Stiahol 9,7 gigabajtov veľmi dôverných súborov a obchodných tajomstiev vrátane plánov, dizajnových súborov a testovacej dokumentácie.“	0.625	0.688	0.688	0.688	0.625	0.35	0.12	0	0	0.438	0.5	0.5	0.5	0.438	0.56	0.4	0.28	0.23	-0.187	-0.188	-0.188	-0.188	-0.187	0.21	0.28	0.28	0.23	B
161	12	d161s12	Google claims other former employees who left to join Otto took further documents.	Google tvrdí, ďalší bývalých zamestnancov, ktorí odišli pripojiť Otto vzal ďalšie dokumenty.	Google tvrdí, ďalší bývalí zamestnanci, ktorí začali pracovať pre Otto vzali ďalšie dokumenty.	Google tvrdí, že ďalšie dokumenty ukradli aj iní bývalí zamestnanci Waymo, ktorí v súčasnosti pracujú v spoločnosti Otto.	0.667	0.833	0.833	0.833	0.833	0.33	0.12	0	0	0.556	0.778	0.778	0.778	0.722	0.44	0.18	0	0	-0.111	-0.055	-0.055	-0.055	-0.111	0.11	0.06	0	0	B
161	13	d161s13	Otto was founded in January 2016 and had sold to Uber within six months.	Otto bola založená v januári 2016 a bola predaná Uber do šiestich mesiacov.	Spoločnosť Otto bola založená v januári 2016 a bola predaná Uberu do šiestich mesiacov.	Starup Otto založili v januári 2016 a Uber ho kúpil v priebehu šiestich mesiacov.	0.357	0.571	0.571	0.571	0.5	0.57	0.3	0.16	0.09	0.429	0.571	0.571	0.571	0.5	0.5	0.3	0.16	0.09	0.072	0	0	0	0	-0.07	0	0	0	B
161	14	d161s14	The ride-hailing company began testing its fleet of self-driving cars less than four months after the acquisition in December last year.	Idúci ohlasovacích spoločnosť začala testovať svoju flotilu samořiditelným vozidiel menej ako štyri mesiace po akvizícii v decembri minulého roka.	Sprostredkovacia taxi služba začala testovať flotilu autonómnych vozidiel v decembri minulého roka, menej ako štyri mesiace po kúpe spoločnosti.	Sprostredkovacia taxi služba začala testovať flotilu autonómnych vozidiel v decembri minulého roka, menej ako štyri mesiace po kúpe spoločnosti.	0.368	0.737	0.737	0.737	0.526	0.63	0.38	0.23	0.12	0	0	0	0	0	1	1	1	1	-0.368	-0.737	-0.737	-0.737	-0.526	0.37	0.62	0.77	0.88	B
161	15	d161s15	Google said it was made aware of the possible copying when one of its suppliers mistakenly attached machine drawings of Uber's technology in an email.	Google uviedlo, že bola informovaná o možnom kopírovanie, keď jeden z jej dodávateľov chybne pripojené výkresy strojné technológie Uber v e-mailu.	Google uviedla, že bola informovaná o možnosti kopírovania, keď jeden z ich dodávateľov náhodou priložil v emaili nákresy vozidiel technológie Uberu.	Google sa vyjadril, že vedel o možnosti kopírovania ich súborov, pretože jeden z ich dodávateľov omylom priložil k mailu nákresy vozidiel technológie Uberu.	0.696	0.783	0.783	0.783	0.783	0.3	0.04	0	0	0.348	0.435	0.435	0.435	0.435	0.6	0.36	0.24	0.1	-0.348	-0.348	-0.348	-0.348	-0.348	0.3	0.32	0.24	0.1	B
161	16	d161s16	"Its design bore a striking resemblance to Waymo's unique LiDAR design," Google said.	"Jeho dizajn niesol nápadnú podobnosť k unikátnej konštrukcii LIDAR Waymo," uviedol Google.	"Jeho dizajn sa mimoriadne podobal unikátnemu dizajnu LIDAR spoločnosti Waymo," uviedol Google.	„Návrhy sa mimoriadne podobali na jedinečný LiDAR dizajn spoločnosti Waymo,“ povedal Google.	0.769	0.923	0.923	0.923	0.846	0.23	0	0	0	0.462	0.615	0.615	0.615	0.538	0.53	0.16	0	0	-0.307	-0.308	-0.308	-0.308	-0.308	0.3	0.16	0	0	B
161	17	d161s17	Uber said:	Uber povedal:	Uber povedal:	Uber vyhlásil:	0.5	0.5	0.5	0.5	0.5	0.5	0	0	0	0.5	0.5	0.5	0.5	0.5	0.5	0	0	0	0	0	0	0	0	0	0	0	0	B
161	18	d161s18	"We take the allegations made against Otto and Uber employees seriously and we will review this matter carefully."	"Berieme tvrdenia uvedené proti Otto a Uber zamestnancom vážne a budeme túto záležitosť starostlivo skontrolovať."	„Žalobu proti zamestnancom spoločností Otto a Uber berieme vážne a prípad dôkladne prešetríme.“	„Žalobu proti zamestnancom spoločností Otto a Uber berieme vážne a prípad dôkladne prešetríme.“	0.538	0.769	0.769	0.769	0.615	0.53	0.21	0.07	0	0	0	0	0	0	1	1	1	1	-0.538	-0.769	-0.769	-0.769	-0.615	0.47	0.79	0.93	1	B
161	18	d161s18	"We take the allegations made against Otto and Uber employees seriously and we will review this matter carefully."	"Berieme tvrdenia uvedené proti Otto a Uber zamestnancom vážne a budeme túto záležitosť starostlivo skontrolovať."	„Žalobu proti zamestnancom spoločností Otto a Uber berieme vážne a prípad dôkladne prešetríme.“	„Žalobu proti zamestnancom spoločností Otto a Uber berieme vážne a prípad dôkladne prešetríme.“	0.538	0.769	0.769	0.769	0.615	0.53	0.21	0.07	0	0	0	0	0	0	1	1	1	1	-0.538	-0.769	-0.769	-0.769	-0.615	0.47	0.79	0.93	1	B
162	1	d162s1	Community-based brands and personal engagement	značky komunitné a osobné angažovanosť	Komunitné značky a osobná angažovanosť.	Komunitné značky a zapájanie užívateľov	0.4	0.8	0.8	0.8	0.6	0.6	0	0	0	0.4	0.4	0.4	0.4	0.4	0.6	0.5	0.33	0	0	-0.4	-0.4	-0.4	-0.2	0	0.5	0.33	0	E
162	2	d162s2	Andrew Shapiro of Airbnb and Julia Hoffmann of Etsy offered aÂ peek into the world of these â€žplatform brandsâ€o at last yearâ€™s Brand New Conference in New York.	Andrew Shapiro z Airbnb a Julia Hoffmann z Etsy ponúkol AA nahliadnuť do sveta týchto â € žplatform Brands € o konečne year € ™ s zbrusu nový konferencii v New Yorku.	Andrew Shapiro z Airbnb a Julia Hoffmann z Etsy nám ponúkli nahliadnutie do sveta týchto "platformových značiek" na minuloročnej "Brand New" konferencii v New Yorku.	Minulý rok sme na konferencii Brand New Conference v New Yorku mali možnosť nahliadnuť do sveta tzv. platformových značiek. Okrem iných tu prednášali aj Andrew Shapiro z Airbnb a Julia Hoffmann z portálu Etsy.	0.5	0.912	0.912	0.912	0.647	0.47	0.33	0.25	0.16	0.412	0.882	0.882	0.882	0.559	0.58	0.36	0.22	0.16	-0.088	-0.03	-0.03	-0.03	-0.088	0.11	0.03	-0.03	0	E
162	3	d162s3	Both are community-based brands with ultra-strong ties to their users.	Obaja sú komunitné značky s ultra-silnými väzbami na svojich užívateľov.	Obe sú komunitné značky s ultra-silnými väzbami na svojich užívateľov.	Obe značky sú založené na komunite, s veľmi silným vzťahom k ich užívateľom.	0.692	0.846	0.846	0.846	0.769	0.3	0	0	0	0.615	0.769	0.769	0.769	0.769	0.38	0	0	0	-0.077	-0.077	-0.077	-0.077	0	0.08	0	0	0	E
162	4	d162s4	This is where the two worlds of branding split.	To je miesto, kde dva svety rozdelenie značky.	A toto je miesto, kde sa dva svety značiek rozchádzajú.	Ich stratégia však nie je rovnaká vo všetkých smeroch.	0.889	1	1	1	0.889	0.11	0	0	0	1	1	1	1	0.889	0.1	0	0	0	0.111	0	0	0	0	-0.01	0	0	0	E
162	5	d162s5	While one gives you aÂ set of rules, guidelines and restrictions, the other offers you aÂ personal relationship with the brand.	Zatiaľ čo jedna vám dáva aa súborom pravidiel, pokynov a obmedzenia, druhá ponúka aa osobný vzťah k značke.	Zatiaľ čo jedna vám dáva súbor pravidiel, pokynov a obmedzení, druhá ponúka osobný vzťah k značke.	Jedna zo služieb má stanovené jasné pravidlá, zásady a obmedzenia, zatiaľ čo druhá vám ponúka osobný vzťah so značkou.	0.474	0.789	0.789	0.789	0.737	0.52	0.16	0	0	0.526	0.737	0.737	0.737	0.684	0.47	0.16	0.06	0	0.052	-0.052	-0.052	-0.052	-0.053	-0.05	0	0.06	0	E
162	6	d162s6	The pioneering companies that are driving the paradigm shift in the way we work and live are also in the forefront of the change in branding and corporate identity.	Priekopnícke firmy, ktoré sú hnacou posun v spôsobe, akým budeme pracovať a žiť, sú tiež na čele zmien v brandingu a corporate identity.	Priekopnícke firmy, ktoré sú hnacou silou posunu v spôsobe, akým budeme pracovať a žiť, sú tiež na čele zmien v brandingu a corporate identity.	Okrem toho, že Airbnb a Etsy zásadne menia spôsob, akým žijeme a pracujeme, sú tiež priekopníkmi v zmenách v brandingu a firemnej identite.	0.609	0.739	0.739	0.739	0.696	0.39	0.13	0.04	0	0.652	0.739	0.739	0.739	0.696	0.37	0.13	0.04	0	0.043	0	0	0	0	-0.02	0	0	0	E
162	7	d162s7	IÂ donâ€™t think i tis aÂ coincidence that these shifts correlate to the rise of the freelance workforce, where one is in control of oneâ€™s own life and work balance, maintaining oneâ€™s autonomy and independence while realizing oneâ€™s creative potential.	IA dona € ™ t myslím, že tote AA náhoda, že tieto posuny korelujú s vzostupom na voľnej nohe pracovných síl, z ktorých jeden je pod kontrolou Rokujeme € ™ s vlastnou životné a pracovné rovnováhy pri zachovaní Rokujeme € ™ s samostatnosť a nezávislosť, zatiaľ čo si uvedomil, jednáte € ™ s tvorivý potenciál.	Nemyslím si, že je náhoda, že tieto posuny korelujú s vzostupom pracovnej sily na voľnej nohe, kde má človek pod kontrolou vlastnú životnú a pracovnú rovnováhu a zachováva si samostatnosť a nezávislosť, zatiaľ čo využíva svoj tvorivý potenciál.	Nie náhodu s nástupom týchto zmien vzrastá počet freelancerov, teda ľudí pracovne na voľnej nohe, ktorí sa sami rozhodujú koľko a ako pracujú, udržiavajú si vlastnú nezávislosť a samostatnosť, zatiaľ čo naplno využívajú svoj kreatívny potenciál.	1	1	1	1	0.806	0.27	0.05	0.01	0	0.667	0.833	0.833	0.833	0.722	0.42	0.08	0.02	0	-0.333	-0.167	-0.167	-0.167	-0.084	0.15	0.03	0.01	0	E
162	8	d162s8	Personal engagement is what makes these new brands so successfull and attractive, especially for aÂ younger audience that tends to value experiences more than material goods.	Osobnú angažovanosť je to, čo robí tieto nové značky tak úspešná a atraktívna, najmä pre AA mladšie publikum, ktoré má tendenciu sa cení skúsenosti viac ako hmotných statkov.	Osobná angažovanosť je to, čo robí tieto nové značky tak úspešné a atraktívne, najmä pre mladšie publikum, ktoré má tendenciu oceniť skúsenosti viac ako hmotné statky.	Nové spoločnosti a značky využívajúce osobný, ľudský prístup k užívateľom sú úspešnejšie a atraktívnejšie hlavne pre mladých ľudí, ktorí viac vyhľadávajú zážitky ako produkty.	0.875	1	1	1	0.875	0.21	0	0	0	0.792	1	1	1	0.875	0.23	0	0	0	-0.083	0	0	0	0	0.02	0	0	0	E
162	9	d162s9	These brands donâ€™t give you aÂ strict vessel to fill; they give you aÂ pottery shop where you can mould your own vessel.	Tieto značky dona € ™ t dáme AA prísne nádobu naplniť; oni vám AA keramiky obchod, kde si môžete pretváranie svoju vlastnú loď.	Tieto značky vám nedávajú prísnu nádobu na naplnenie; oni vám dajú obchod s keramikou, kde si môžete vytvoriť svoju vlastnú nádobu.	Tieto značky namiesto hotovej nádoby na naplnenie dávajú priestor a nástroje na vytvarovanie svojej vlastnej.	1	1	1	1	0.933	0.08	0.04	0	0	1	1	1	1	0.867	0.19	0.1	0	0	0	0	0	0	-0.066	0.11	0.06	0	0	E
162	10	d162s10	Airbnbâ€™s new mark went through aÂ round of public ridicule and harassment, but the company stood behind it.	Airbnb € ™ s novou značkou prešla AA bicykli verejnému výsmechu a obťažovania, ale spoločnosť stála za ním.	Airbnb si s novou značkou prešla verejným výsmechom a obťažovaním, ale spoločnosť stála za ňou.	Nový znak Airbnb sa stretol s obrovskou kritikou a zosmiešňovaním zo strany verejnosti, no spoločnosť si za ním aj tak stála.	0.667	0.857	0.857	0.857	0.762	0.33	0.05	0	0	0.667	0.81	0.81	0.81	0.81	0.33	0	0	0	0	-0.047	-0.047	-0.047	0.048	0	-0.05	0	0	E
162	11	d162s11	This perseverance turned aÂ simple mark into aÂ symbol of hospitality and personal involvement.	Táto vytrvalosť otočil AA jednoduchú značku do AA symbol pohostinnosti a osobné angažovanosť.	Táto vytrvalosť otočila jednoduchú značku na symbol pohostinnosti a osobnej angažovanosti.	Práve táto vytrvalosť a neústupnosť vytvorila z obyčajného znaku symbol pohostinnosti a ľudského prístupu.	0.571	0.643	0.643	0.643	0.643	0.35	0.23	0.08	0	0.571	0.643	0.643	0.643	0.643	0.35	0.23	0.08	0	0	0	0	0	0	0	0	0	0	E
162	12	d162s12	While safety-area boxes may have protected the logo from interference, they may have created a â€ždo not touchâ€o environment and attitude that would prevent the audience from truly connecting with the brand and adopting it as its own.	Kým bezpečnostná plocha boxy môžu byť chránené logo pred rušením, môžu vytvorili â € zdo nie je Touch € o prostredia a postoj, ktorý by zabránil divákov zo skutočne pripojiť so značkou a jeho prijatie za vlastné.	Kým ohraničená bezpečnostná plocha by mohla chrániť logo pred narušením, mohla by vytvoriť aj prostredie evokujúce nápis "Nedotýkať sa," a postoj, ktorý by zabránil divákom sa skutočne spojiť so značkou a prijať ju za vlastnú.	Rozhodli sa pre jednoduché logo bez striktného ohraničenia, ktoré by ho síce ochránilo pred väčšími zásahmi, no tiež by mohlo pôsobiť menej prístupne, a nevytváralo by akúsi domácu atmosféru, práve vďaka ktorej ľudia časom logo prijali, a osvojili si ho.	0.8	0.975	0.975	0.975	0.95	0.12	0	0	0	0.775	0.95	0.95	0.95	0.9	0.22	0	0	0	-0.025	-0.025	-0.025	-0.025	-0.05	0.1	0	0	0	E
162	13	d162s13	What Google started in aÂ controlled environment, Airbnb took to another level and let the people run with it.	Čo Google začal v AA kontrolovanom prostredí, Airbnb vzal na inú úroveň a nechať ľudí beh s ním.	Čo Google začal v kontrolovanom prostredí, Airbnb vzal na inú úroveň a nechať ľudí to rozbehnúť.	Airbnb si takpovediac požičalo tento "experiment" od Googlu, a rozbehlo sa s ním medzi ľudí.	0.867	1	1	1	0.867	0.27	0.05	0	0	0.867	1	1	1	0.933	0.18	0	0	0	0	0	0	0	0.066	-0.09	-0.05	0	0	E
162	14	d162s14	What seems to be working really well is aÂ combination of aÂ great product, aÂ simple but memorable logo (and yes, aÂ freaked-out public can help your new look go viral) and aÂ loose identity system and set of practical tools that let the consumers tailor the brand voice to their own needs and wishes.	Čo sa zdá, že pracuje naozaj dobre, je aa kombinácia aa skvelý produkt, AA jednoduché, ale pamätné logom (a áno, AA vadí out verejnosť môže pomôcť váš nový vzhľad ísť vírusovej) a aa voľný systém identity a sadu praktických nástrojov, ktoré im umožňovali spotrebitelia prispôsobiť značku hlas vlastných potrieb a prianí.	Čo sa zdá, že pracuje naozaj dobre, je kombinácia skvelého produktu, jednoduchého, ale zapamätateľného loga (a áno, vystrašená verejnosť môže pomôcť vášmu novému vzhľadu stať sa virálnym), voľného systému identity a sady praktických nástrojov, ktoré umožnia spotrebiteľom prispôsobiť si značku podľa vlastných potrieb a prianí.	Vyzerá to teda tak, že recept na úspech je založený na trojkombinácii: skvelý produkt; jednoduché, no zapamätateľné logo (znepokojená verejnosť nie je na škodu už len kvôli virálnosti); a voľný systém identity, ktorý užívateľom umožní prispôsobiť si využívanie značky podľa svojich potrieb a želaní.	0.864	0.955	0.955	0.955	0.795	0.27	0.06	0.02	0	0.773	0.864	0.864	0.864	0.795	0.24	0.04	0	0	-0.091	-0.091	-0.091	-0.091	0	-0.03	-0.02	-0.02	0	E
162	15	d162s15	This egagement translates into an extremely fast and powerful brand bond that only aÂ handful of traditional brands have acheived over aÂ much longer period of time and at much higher cost.	Tento egagement sa premieta do extrémne rýchle a účinné značky puto, že len aa hŕstka tradičných značiek majú, ktoré bolo dosiahnuté v priebehu AA oveľa dlhšie časové obdobie a za oveľa vyššiu cenu.	Táto angažovanosť sa premieta do extrémne rýchleho a účinného puta značky, ktoré má len hŕstka tradičných značiek, a ktoré dosiahli v priebehu oveľa dlhšieho časového obdobia a za oveľa vyššiu cenu.	Zapájanie užívateľa do kreatívneho procesu je to, z čoho vzniká extrémne rýchle a silné puto medzi značkou a užívateľom. Toto sa v rámci tradičných značiek podarilo len niekoľkým, a aj to za niekoľkonásobne dlhší čas a s oveľa väčšími nákladmi.	0.625	0.85	0.85	0.85	0.8	0.34	0.07	0.02	0	0.675	0.85	0.85	0.85	0.825	0.32	0.02	0	0	0.05	0	0	0	0.025	-0.02	-0.05	-0.02	0	E
162	16	d162s16	The results of these brand expressions can sometimes feel naA—ve or â€žunprofessional,â€o but they are authentic and honets, something that all brands strive for.	Výsledky týchto výrazov značky môžu niekedy cítiť naA—ve alebo A € žunprofessional, â € o ale sú autentické a honets, niečo, čo všetky značky usilovať.	Výsledky týchto výrazov značky môžu niekedy pôsobiť naivne alebo neprofesionálne, ale sú autentické a úprimné, čo je niečo, o čo sa všetky značky usilujú.	Takáto stratégia sa môže niekomu zdať neprofesionálna alebo priam naivná, no zároveň predstavuje to, o čo sa usilujú všetky značky: autentickosť a úprimnosť.	0.913	1	1	1	0.913	0.2	0	0	0	0.696	0.957	0.957	0.957	0.826	0.33	0.08	0.04	0	-0.217	-0.043	-0.043	-0.043	-0.087	0.13	0.08	0.04	0	E
163	1	d163s1	Fears for Antarctic penguins as new bird flu strain reaches frozen continent	Obavy o antarktických tučniakov ako nový kmeň vtáčej chrípky dosiahne zmrznutý kontinent	Obavy o antarktických tučniakov - nový kmeň vtáčej chrípky dosiahol zmrznutý kontinent	Obavy o tučniaky v Antarktíde, kvôli novému kmeňu vtáčej chrípky, ktorý zasiahol zamrznutý kontinent	0.714	0.714	0.714	0.714	0.714	0.28	0.07	0	0	0.714	0.714	0.714	0.714	0.714	0.28	0.07	0	0	0	0	0	0	0	0	0	0	0	A
163	2	d163s2	The discovery of a new strain of bird flu in Antarctic penguins has raised concerns the virus is reaching the frozen continent more often than previously thought, flown in by migratory birds.	Objav nového kmeňa vtáčej chrípky v antarktických tučniakov vyvolalo obavy, že vírus dosahuje zmrznuté kontinentu častejšie, než sa predtým myslelo, priletel sťahovavé vtáky.	Objav nového kmeňa vtáčej chrípky u antarktických tučniakov vyvolal obavy, že vírus zasahuje zmrznutý kontinent častejšie, než sa predtým myslelo, prinášaný sťahovavými vtákmi.	Objav nového kmeňa vtáčej chrípky v Antarktíde priniesol obavy, že vírus, ktorý sem prenáša migrujúce vtáctvo, zasahuje zamrznutý kontinent častejšie, než sa pôvodne myslelo.	0.458	0.625	0.625	0.625	0.542	0.54	0.39	0.27	0.14	0.417	0.583	0.583	0.583	0.5	0.58	0.39	0.27	0.14	-0.041	-0.042	-0.042	-0.042	-0.042	0.04	0	0	0	A
163	3	d163s3	Australian researchers helped uncover the new strain of avian influenza in the chinstrap penguin in 2015, finding striking similarities to a North American strain, which meant it had been introduced to Antarctica only recently.	Austrálski výskumníci pomohol odhaliť nový kmeň vtáčej chrípky v tučniak čiapočkatý v roku 2015, nájsť nápadné podobnosti k severoamerickej kmeňa, čo znamenalo, že bol zavedený do Antarktídy len nedávno.	Austrálski výskumníci pomohli v roku 2015 odhaliť nový kmeň vtáčej chrípky u tučniakov čiapočkatých, a nášli nápadné podobnosti so severoamerickým kmeňom, čo znamenalo, že do Antarktídy sa dostal len nedávno.	Austrálski vedci v roku 2015 pomohli odhaliť nový kmeň vtáčej chrípky u tučniakov čiapočkatých, keď objavili obrovské podobnosti so severoamerickým kmeňom, čo znamenalo, že do Antarktídy sa dostal len nedávno.	0.433	0.667	0.667	0.667	0.567	0.6	0.34	0.17	0.07	0.133	0.2	0.2	0.2	0.2	0.86	0.72	0.64	0.55	-0.3	-0.467	-0.467	-0.467	-0.367	0.26	0.38	0.47	0.48	A
163	4	d163s4	The virus was first detected in Antarctica in 2013, but the discovery of the new strain has raised a red flag to the vulnerability of penguins to avian flu and its capacity to reach Antarctica.	Tento vírus bol prvýkrát zistený v Antarktíde v roku 2013, ale objav nového kmeňa vyvolala červenú vlajku na zraniteľnosť tučniakov na vtáčej chrípky a jej schopnosť dosiahnuť Antarktídy.	Tento vírus bol prvýkrát v Antarktíde zistený v roku 2013, ale objav nového kmeňa je varovným signálom pokiaľ ide o náchylnosť tučniakov voči vtáčej chrípke a jej schopnosť dosiahnuť Antarktídu.	Prvýkrát bol vírus v Antarktíde zaznamenaný v roku 2013, ale odhalenie nového kmeňa je varovným signálom pokiaľ ide o náchylnosť tučniakov na vtáčiu chrípku a jej schopnosť dosiahnuť Antarktídu.	0.414	0.552	0.552	0.552	0.483	0.62	0.32	0.14	0.07	0.207	0.276	0.276	0.276	0.241	0.8	0.58	0.46	0.37	-0.207	-0.276	-0.276	-0.276	-0.242	0.18	0.26	0.32	0.3	A
163	5	d163s5	Associate professor Aeron Hurt, of the Melbourne-based Peter Doherty Institute for Infection and Immunity, said scientists had previously thought viruses rarely reached Antarctica.	Docent Aeron Hurt, z Melbourne-založené Pete Doherty Institute for Infection and Immunity, povedal vedci predtým myslelo vírusy zriedka dosiahol Antarktídy.	Docent Aeron Hurt z Pete Doherty Institute for Infection and Immunity sídliaceho v Melbourne povedal, že vedci si predtým mysleli, že vírusy dosiahnu Antarktídu len zriedka.	Docent Aeron Hurt z Inštitútu Petera Dohertyho pre infekcie a imunitu, ktorý sídli v Melbourne, povedal, že vedci si v minulosti mysleli, že vírus môže dosiahnuť Antarktídu len zriedka.	0.759	0.793	0.793	0.793	0.793	0.24	0.1	0.07	0.04	0.448	0.483	0.483	0.483	0.483	0.51	0.39	0.26	0.15	-0.311	-0.31	-0.31	-0.31	-0.31	0.27	0.29	0.19	0.11	A
[truncated: 2,483 more rows]
